# Supplementary material for: An open source tool for automatic spatiotemporal assessment of calcium transients and local ‘signal-close-to-noise’ activity in calcium imaging data
Source: PubMed Central journal article supplement (PMC5895056; doi:10.1371/journal.pcbi.1006054), 2018-03-30

# Total activity 102

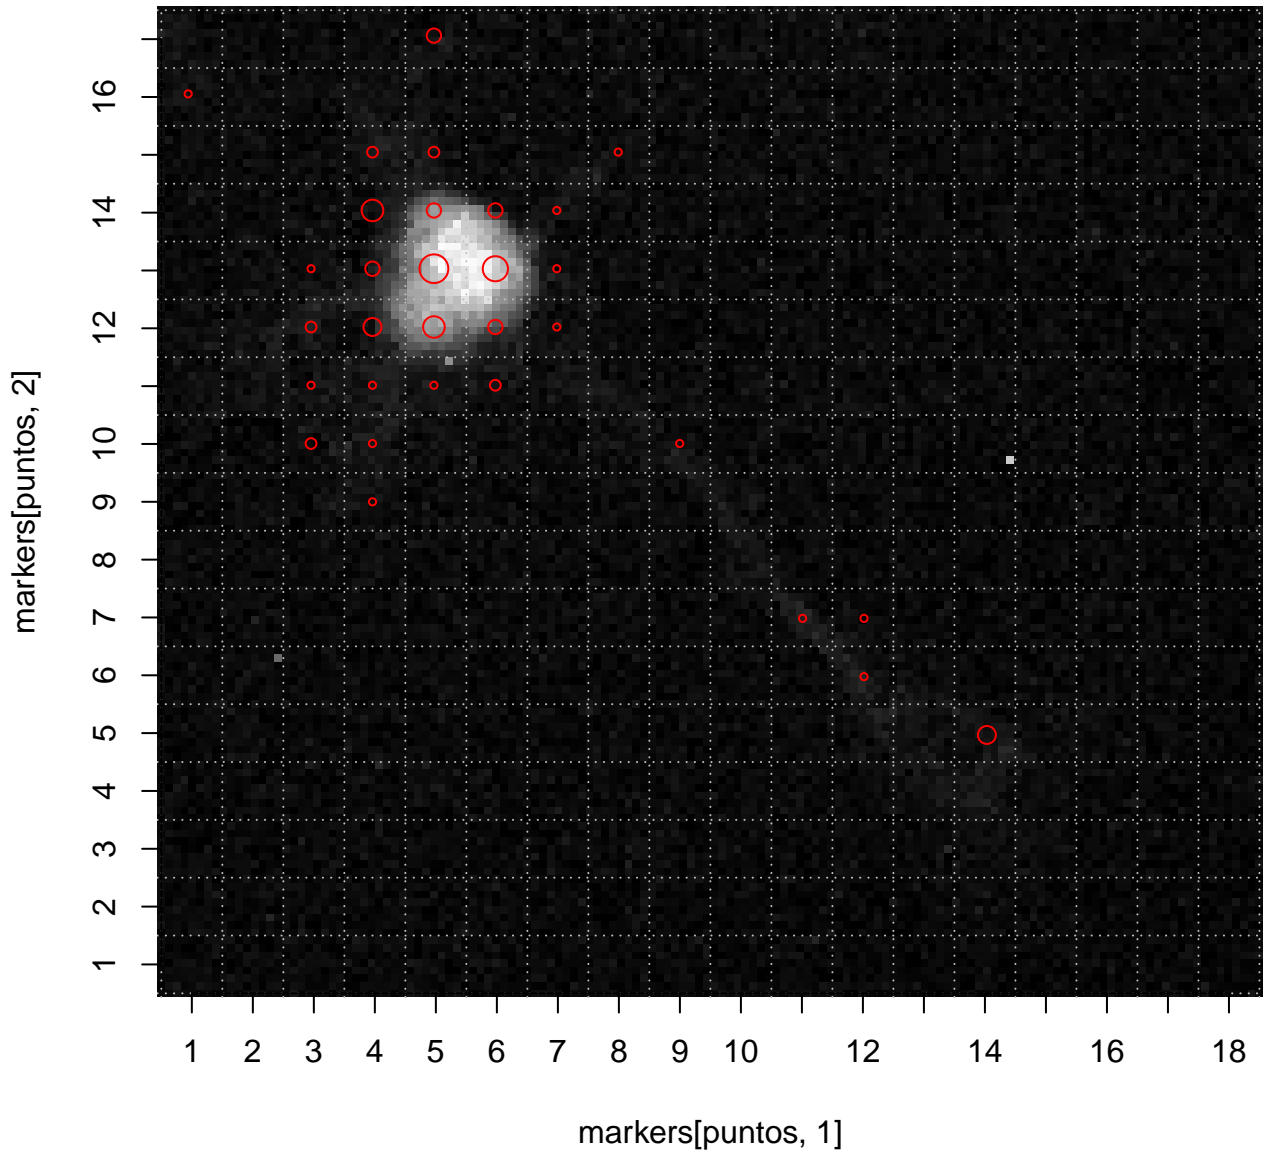

**Graph 5 , 17    Total Activity 4    Position in Array 5**

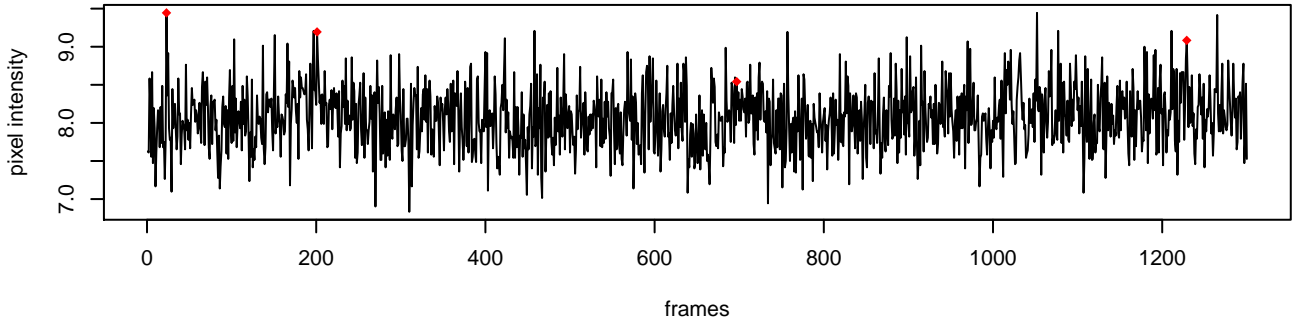

**Graph 1 , 16    Total Activity 2    Position in Array 19**

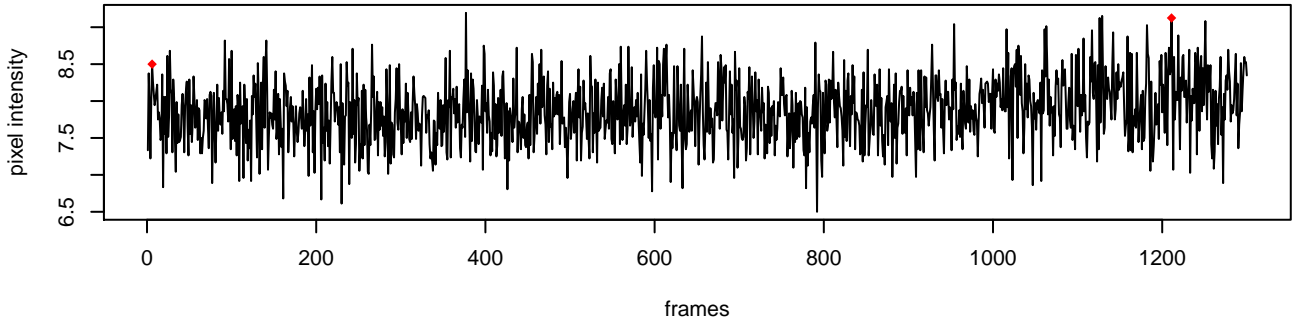

**Graph 4 , 15    Total Activity 3    Position in Array 40**

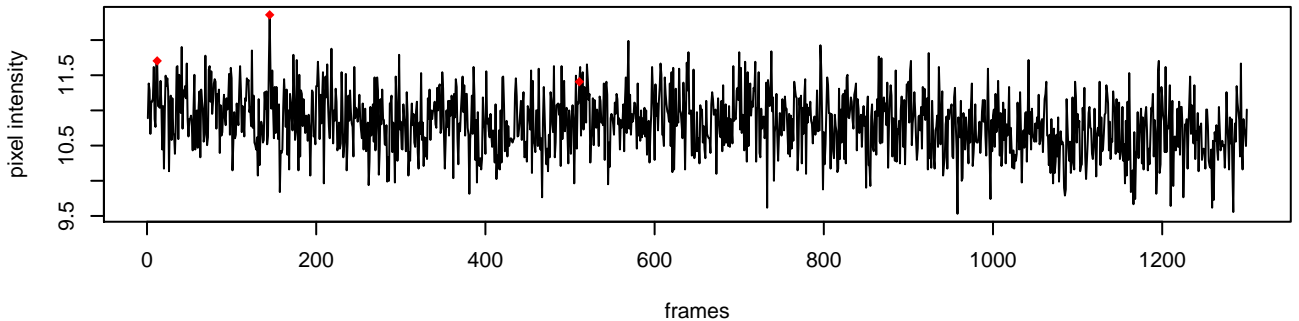

**Graph 5 , 15    Total Activity 3    Position in Array 41**

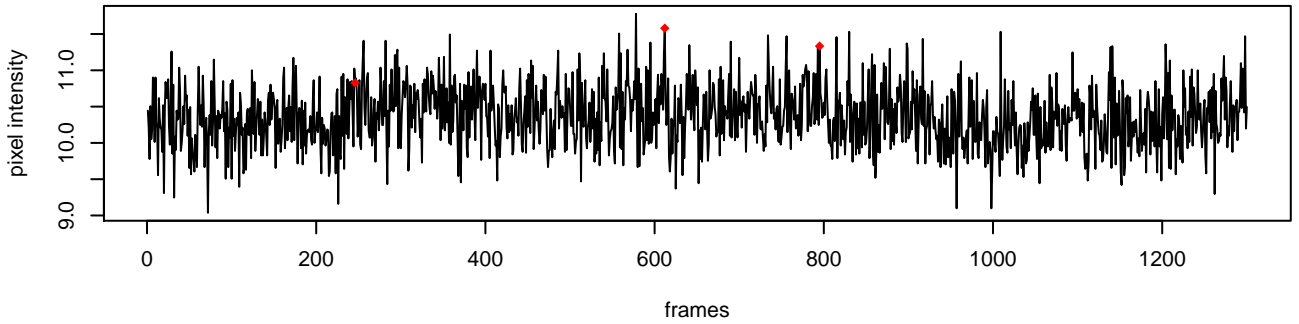

**Graph 8 , 15    Total Activity 2    Position in Array 44**

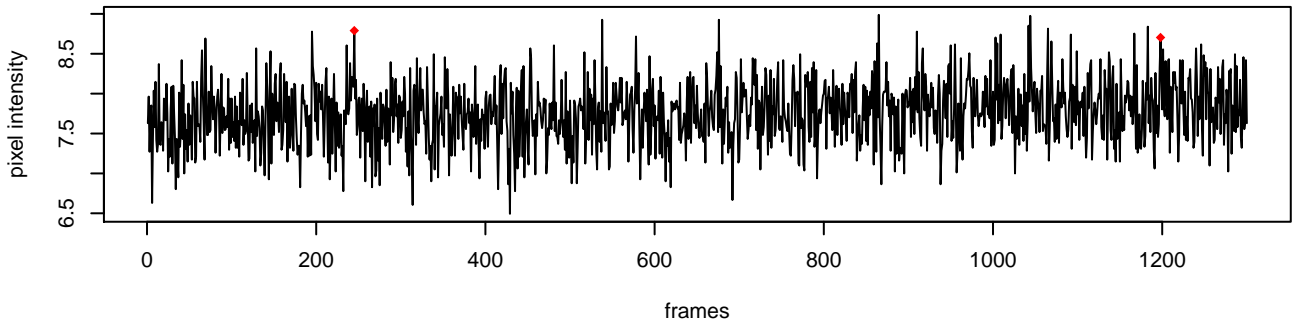

**Graph 4 , 14    Total Activity 6    Position in Array 58**

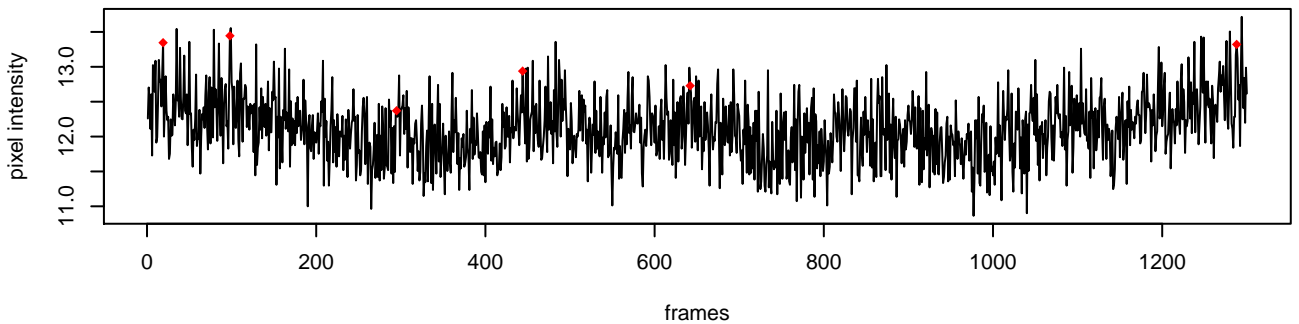

**Graph 5 , 14    Total Activity 4    Position in Array 59**

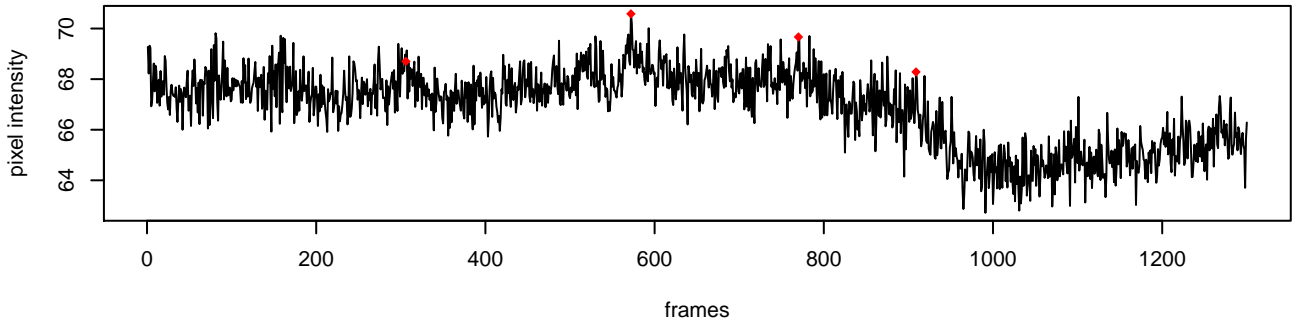

**Graph 6 , 14    Total Activity 4    Position in Array 60**

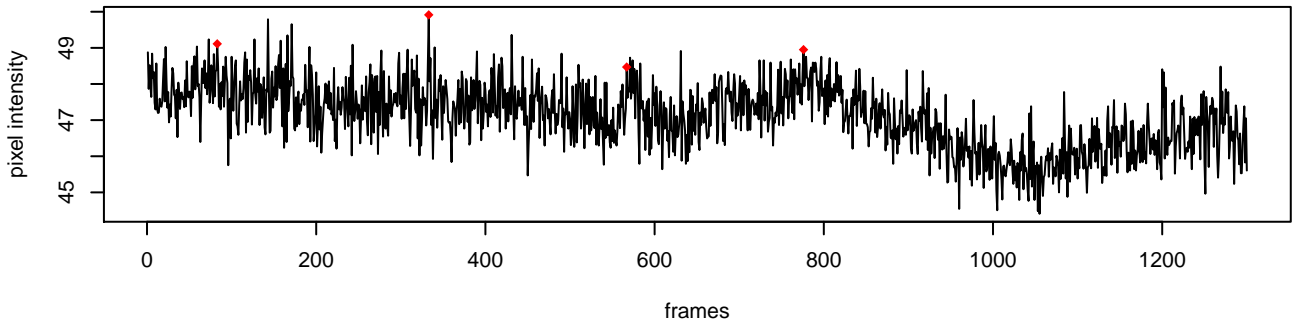

**Graph 7 , 14    Total Activity 2    Position in Array 61**

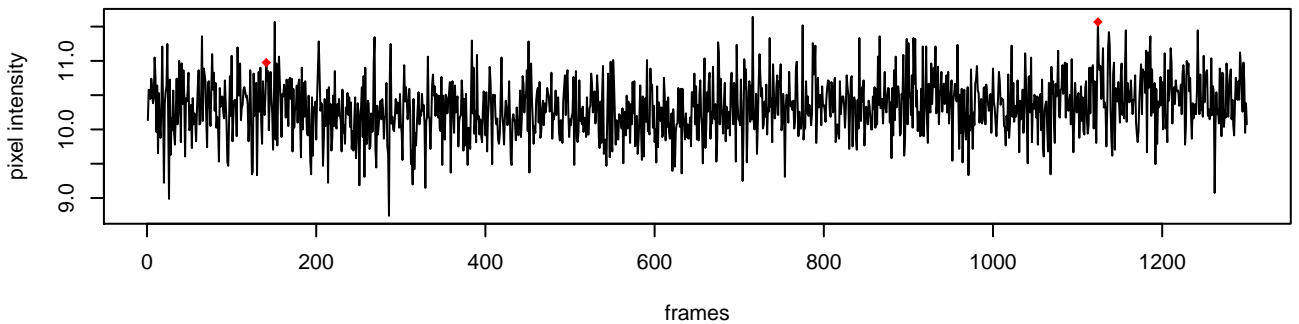

**Graph 3 , 13    Total Activity 2    Position in Array 75**

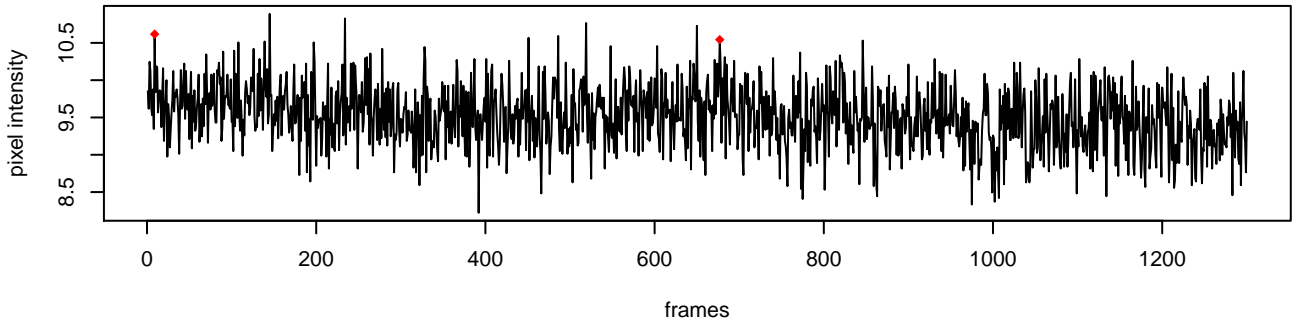

**Graph 4 , 13    Total Activity 4    Position in Array 76**

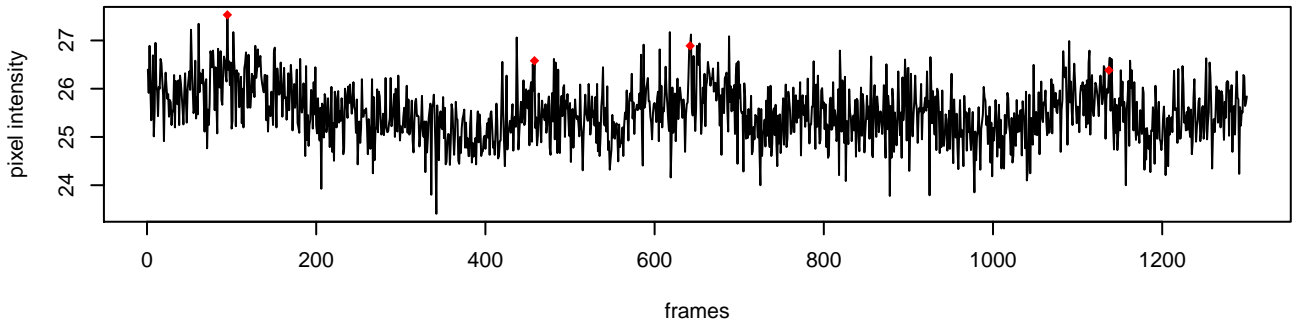

**Graph 5 , 13    Total Activity 8    Position in Array 77**

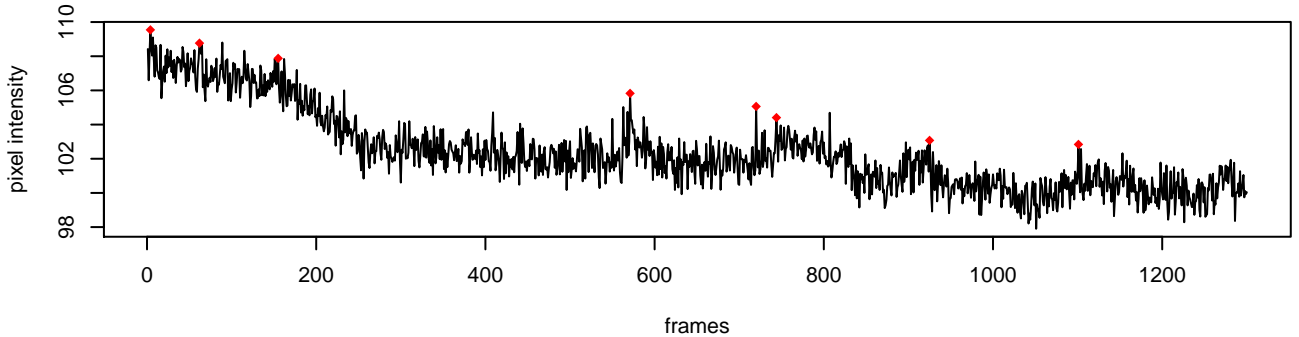

**Graph 6 , 13    Total Activity 7    Position in Array 78**

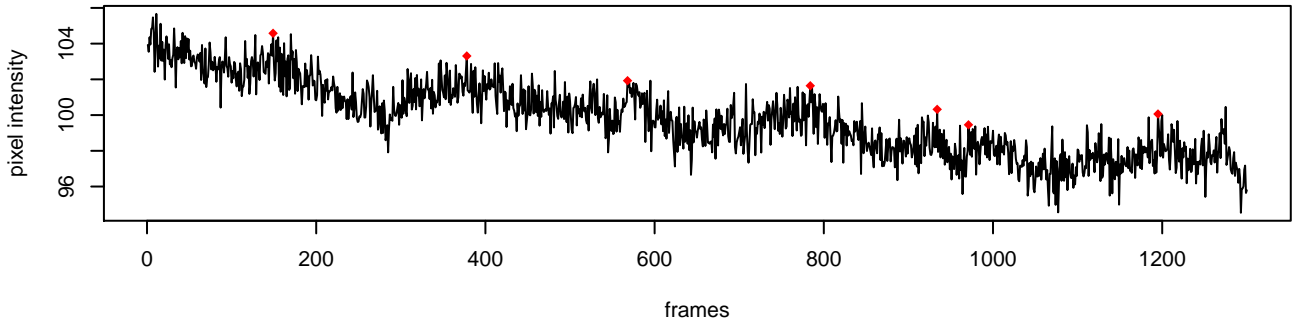

**Graph 7 , 13    Total Activity 2    Position in Array 79**

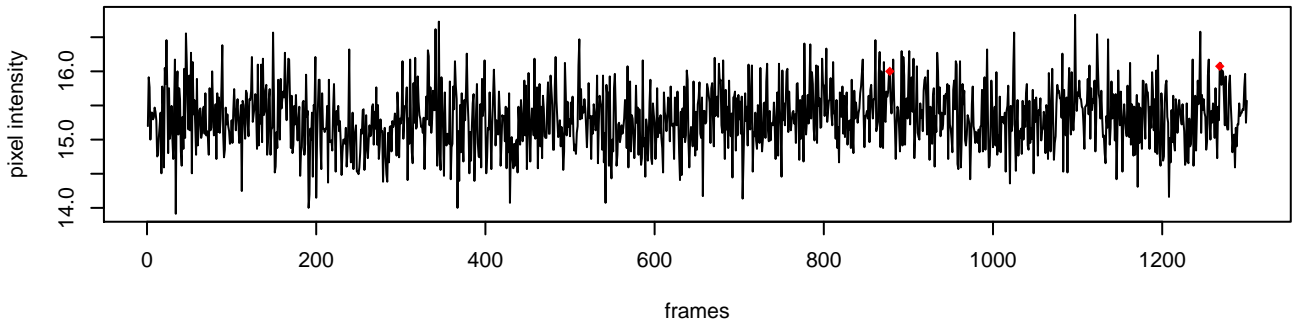

**Graph 3 , 12    Total Activity 3    Position in Array 93**

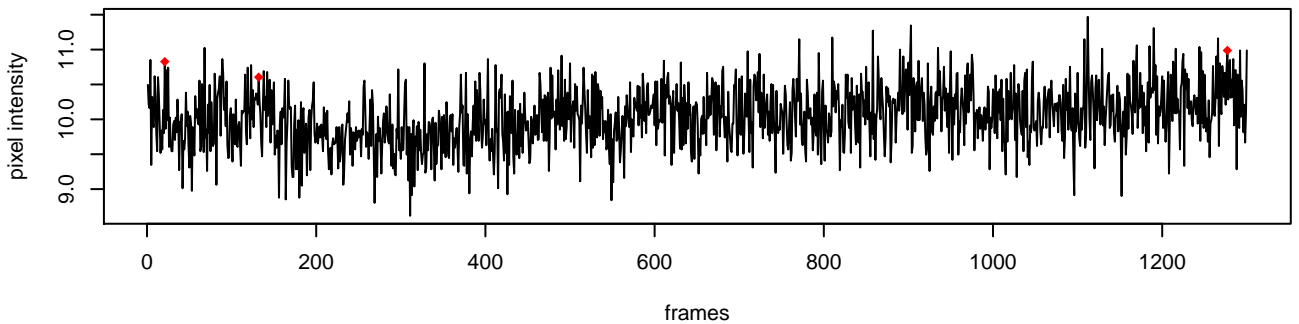

**Graph 4 , 12    Total Activity 5    Position in Array 94**

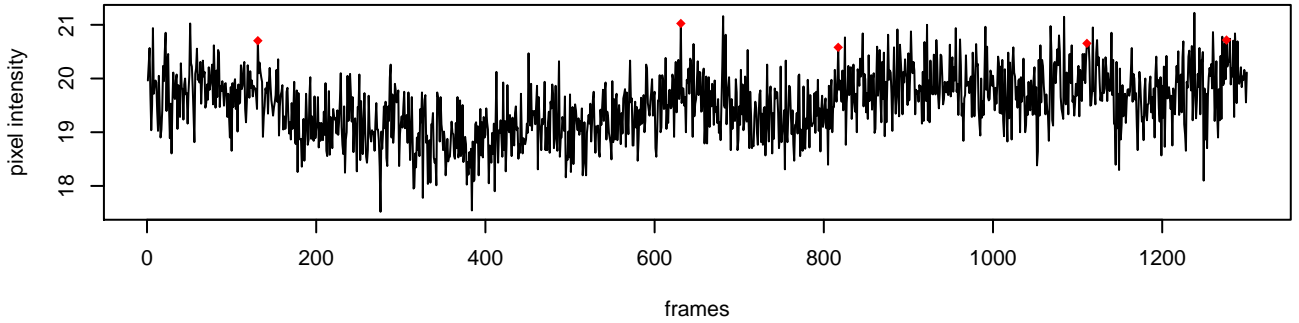

**Graph 5 , 12    Total Activity 6    Position in Array 95**

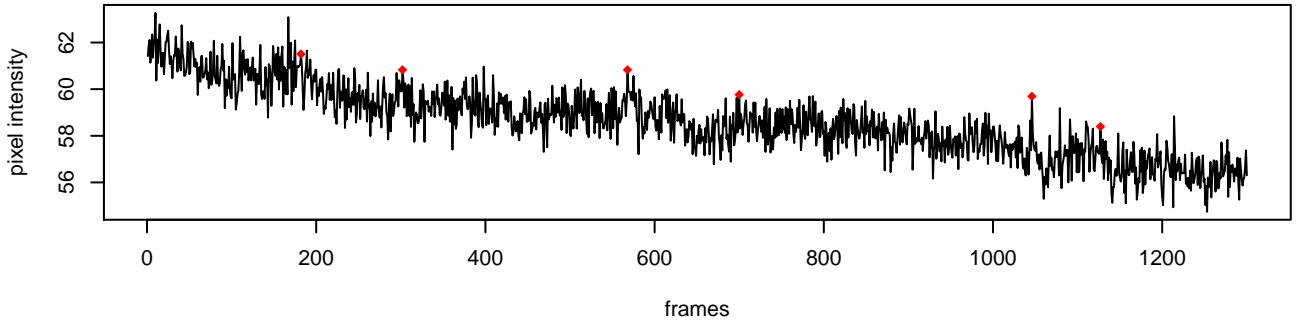

**Graph 6 , 12    Total Activity 4    Position in Array 96**

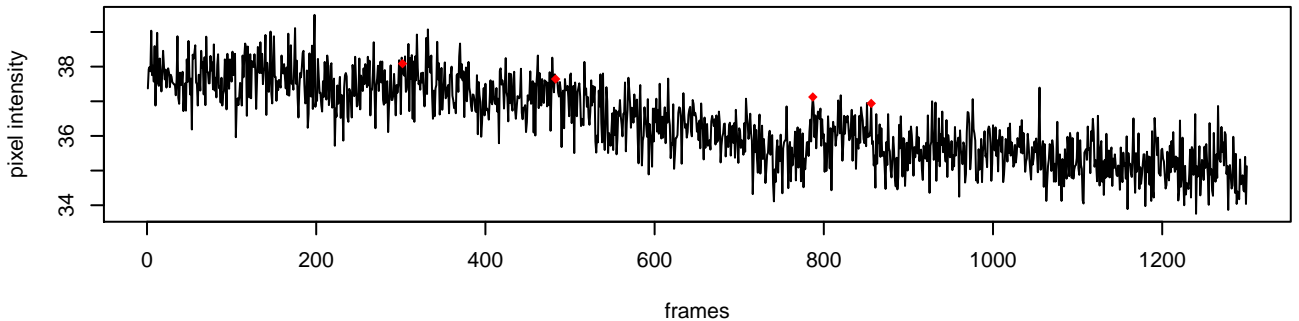

**Graph 7 , 12    Total Activity 2    Position in Array 97**

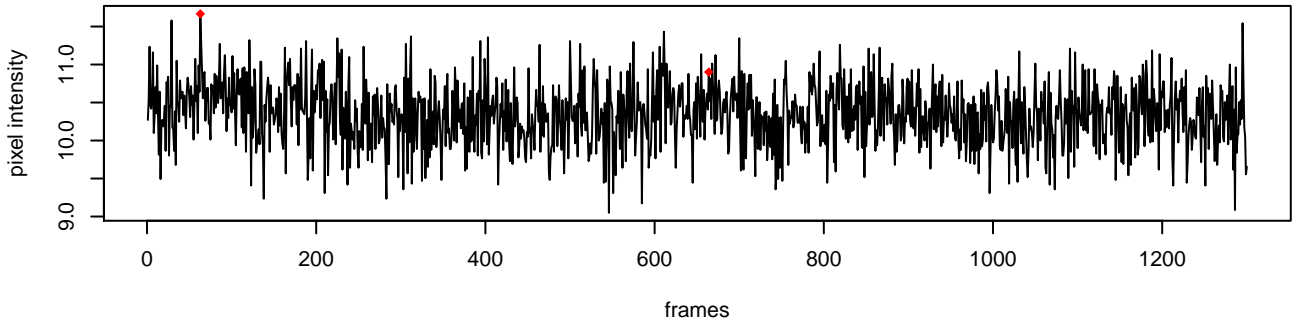

**Graph 3 , 11    Total Activity 2    Position in Array 111**

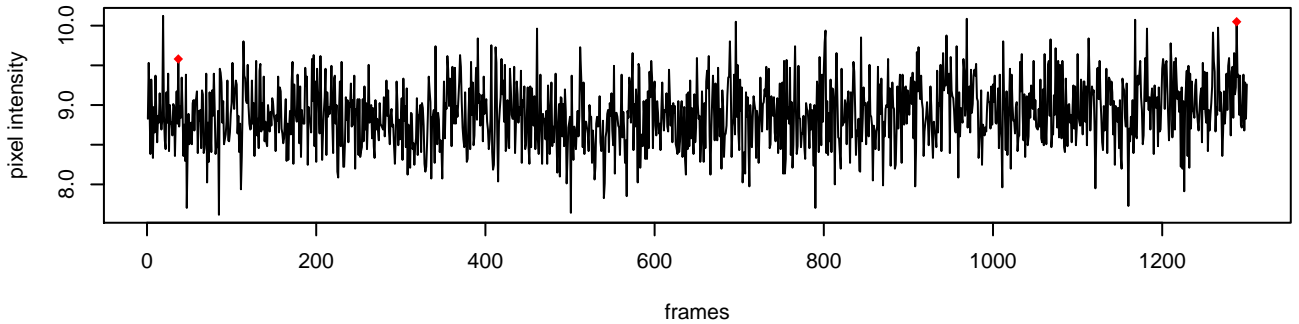

**Graph 4 , 11    Total Activity 2    Position in Array 112**

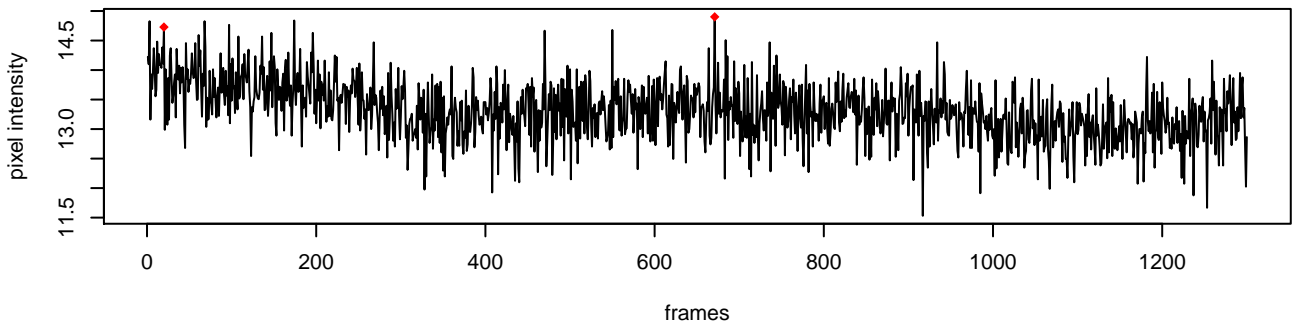



**Graph 5 , 11    Total Activity 2    Position in Array 113**

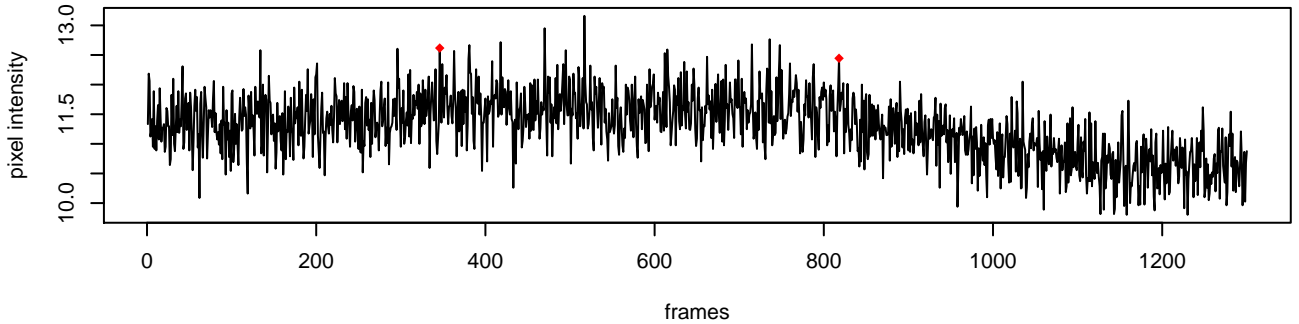

**Graph 6 , 11    Total Activity 3    Position in Array 114**

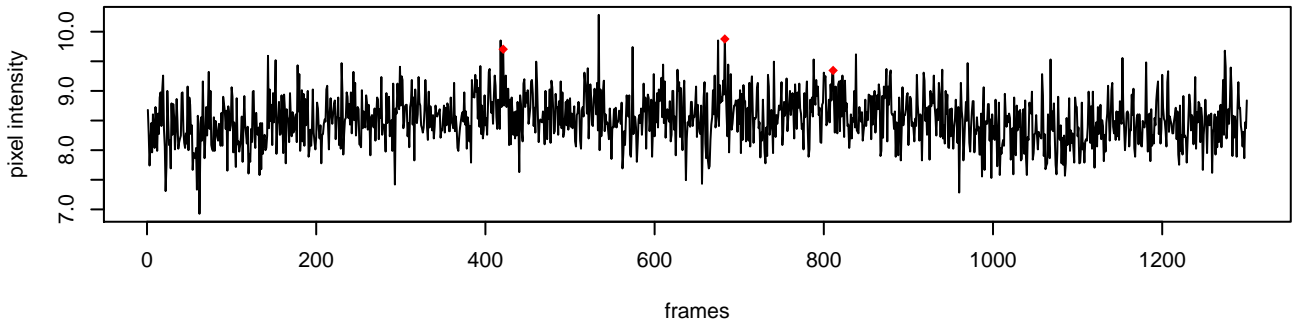

**Graph 3 , 10    Total Activity 3    Position in Array 129**

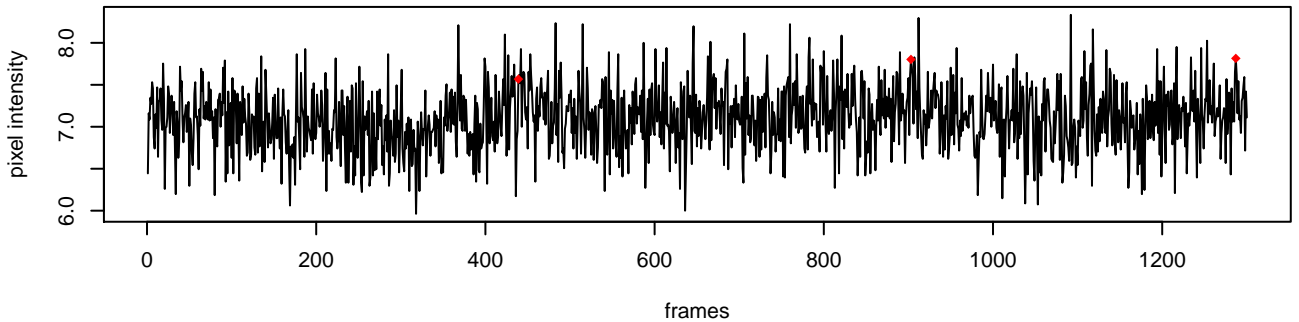

**Graph 4 , 10    Total Activity 2    Position in Array 130**

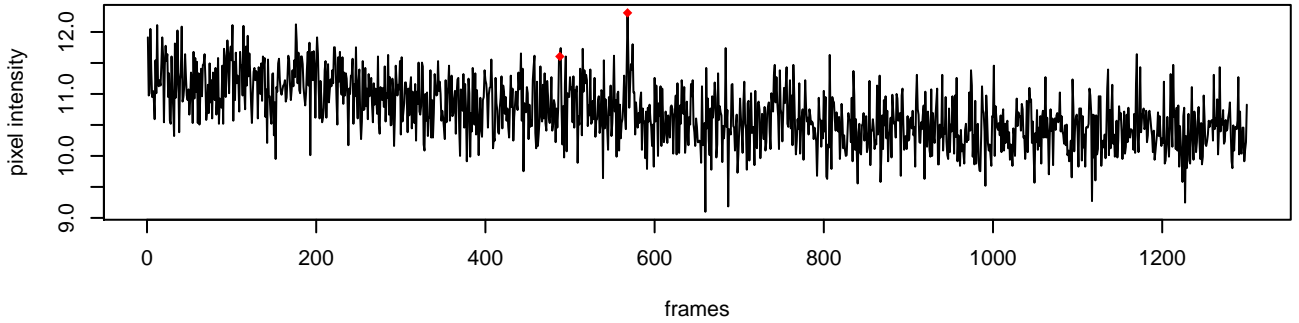

**Graph 9 , 10    Total Activity 2    Position in Array 135**

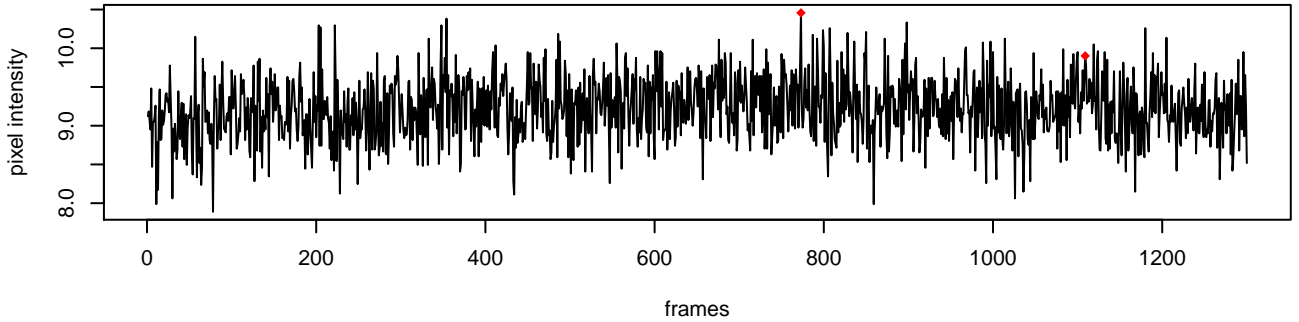

**Graph 4 , 9    Total Activity 2    Position in Array 148**

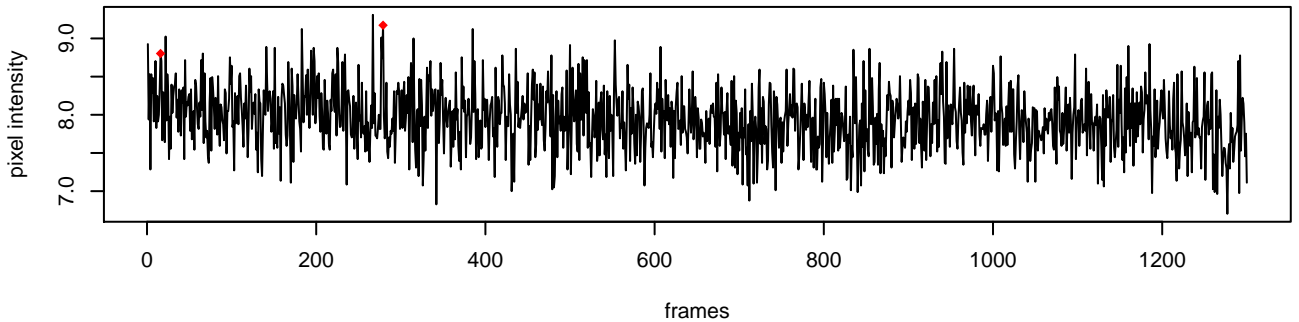

**Graph 11 , 7    Total Activity 2    Position in Array 191**

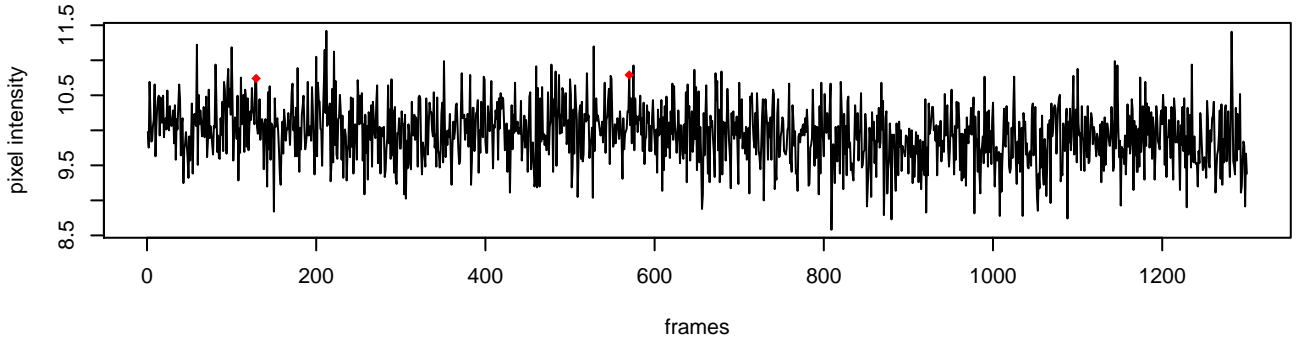

**Graph 12 , 7    Total Activity 2    Position in Array 192**

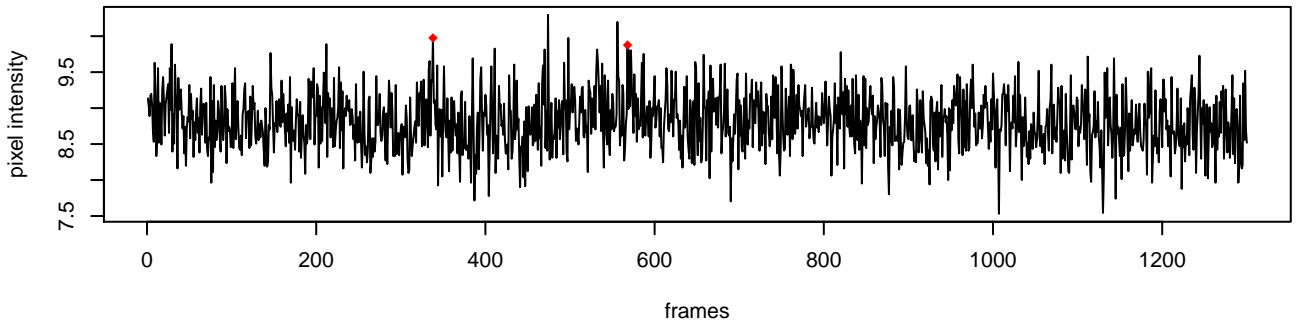

**Graph 12 , 6    Total Activity 2    Position in Array 210**

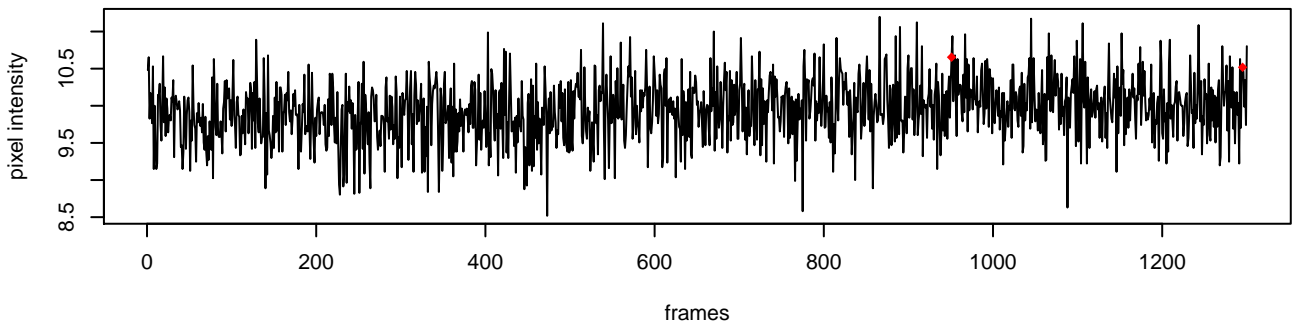

**Graph 14 , 5    Total Activity 5    Position in Array 230**

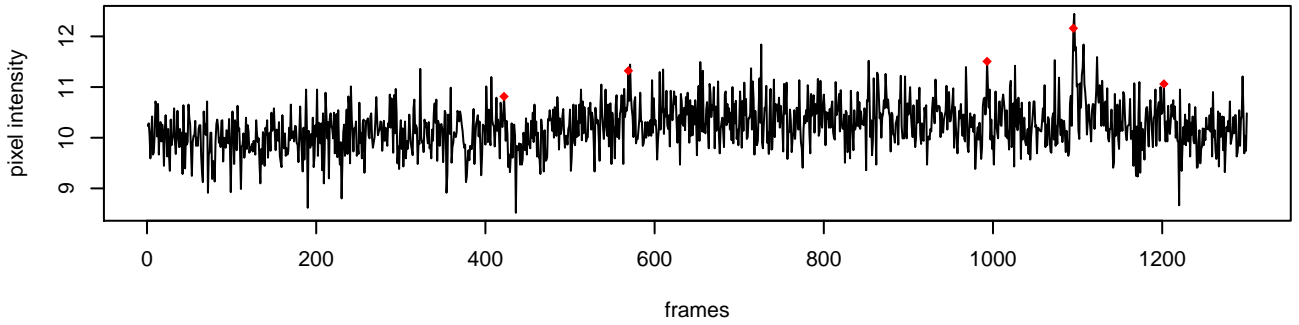

Supplement: pcbi.1006054.s003.pdf [file pcbi.1006054.s003.pdf]
