# Supplementary material for: An open source tool for automatic spatiotemporal assessment of calcium transients and local ‘signal-close-to-noise’ activity in calcium imaging data
Source: PubMed Central journal article supplement (PMC5895056; doi:10.1371/journal.pcbi.1006054), 2018-03-30

**Graph 1 , 33    Total Activity 2    Position in Array 1**

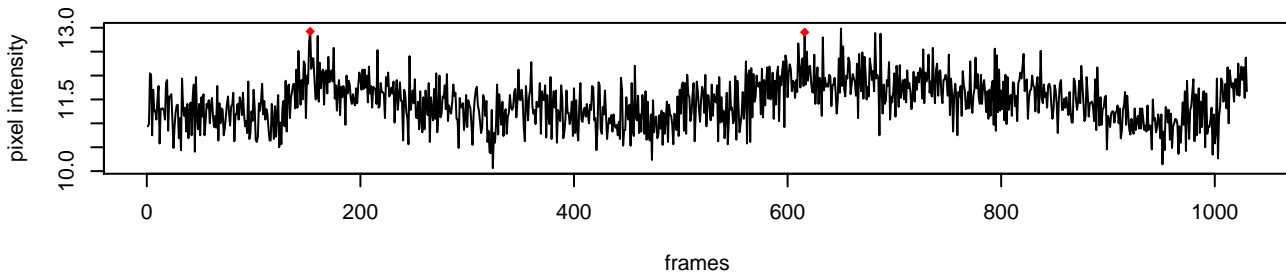

**Graph 2 , 33    Total Activity 3    Position in Array 2**

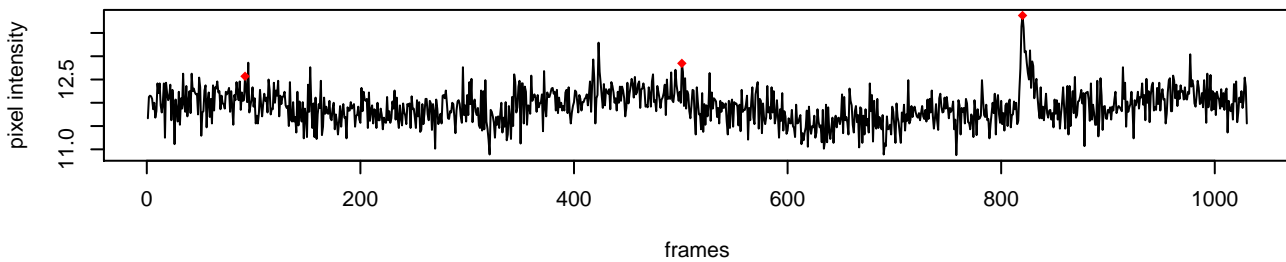

**Graph 15 , 33    Total Activity 3    Position in Array 15**

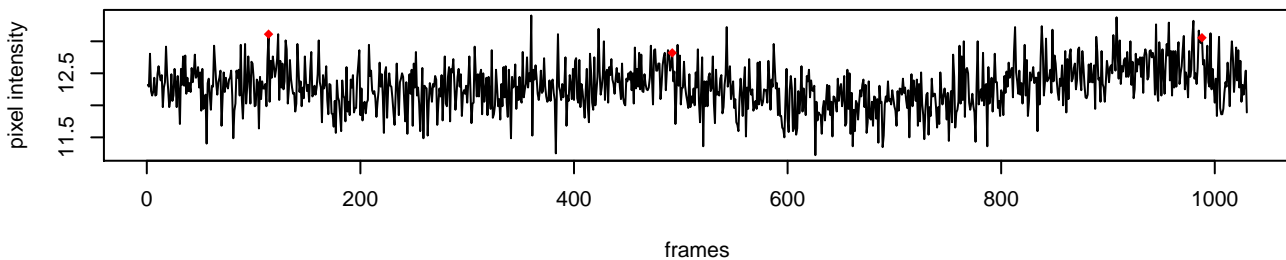

**Graph 26 , 33    Total Activity 5    Position in Array 26**

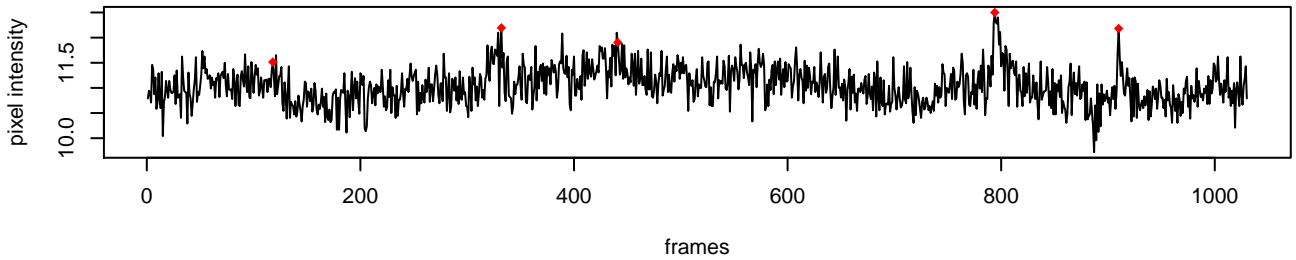

**Graph 27 , 33    Total Activity 7    Position in Array 27**

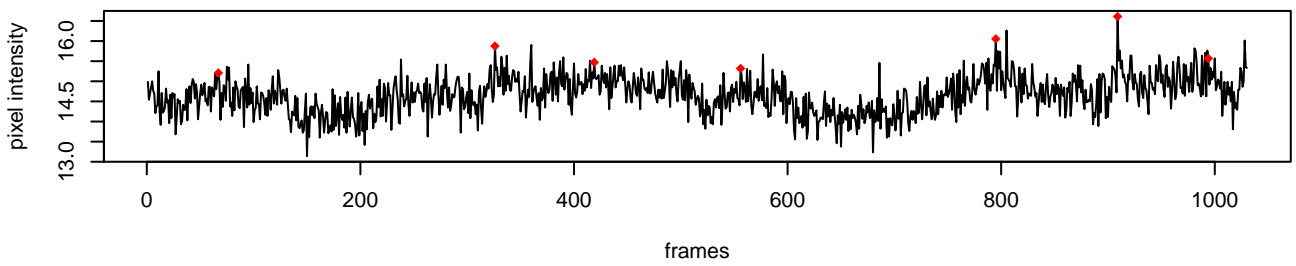

**Graph 28 , 33    Total Activity 3    Position in Array 28**

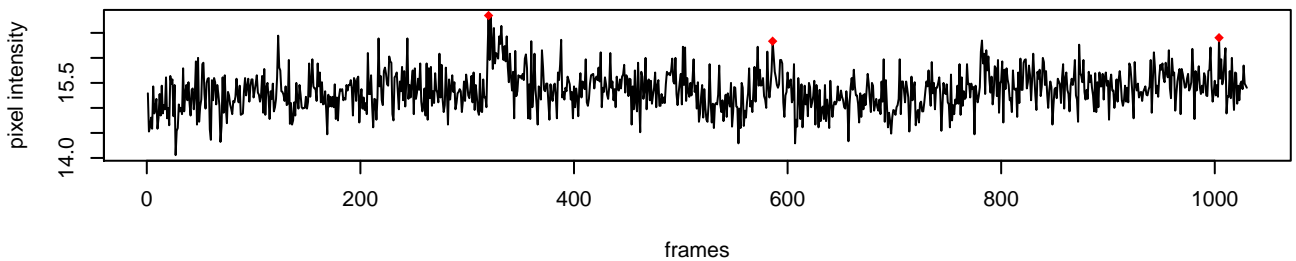

**Graph 32 , 33    Total Activity 4    Position in Array 32**

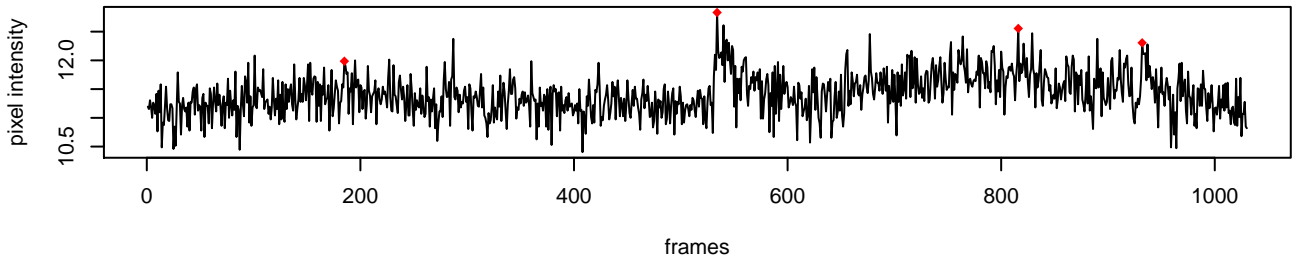

**Graph 37 , 33    Total Activity 3    Position in Array 37**

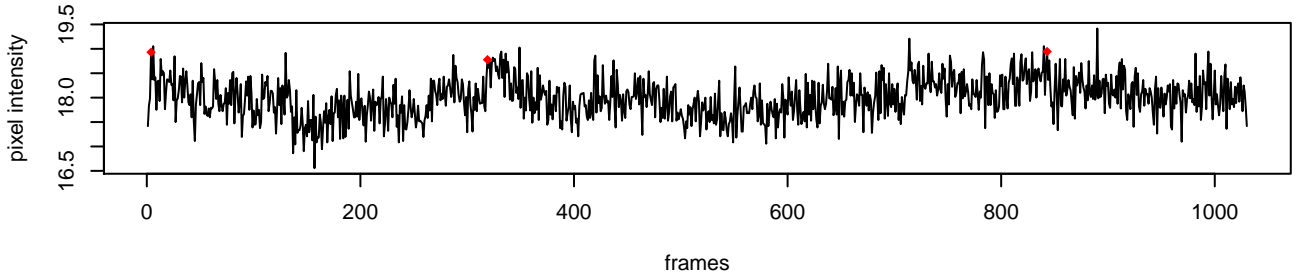

**Graph 38 , 33    Total Activity 5    Position in Array 38**

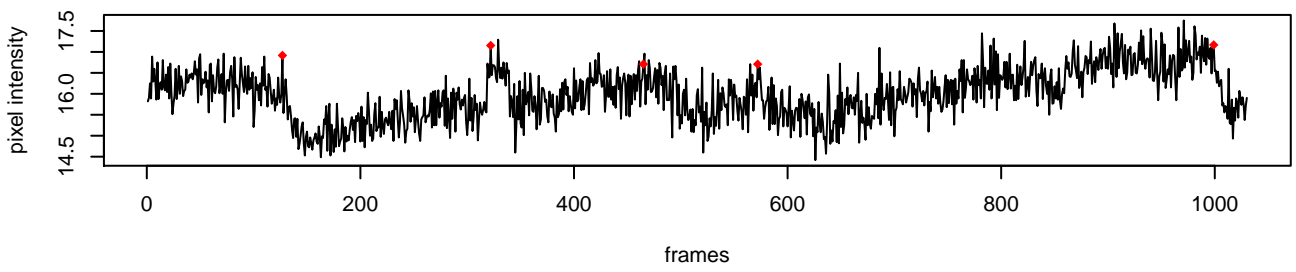

**Graph 1 , 32    Total Activity 4    Position in Array 45**

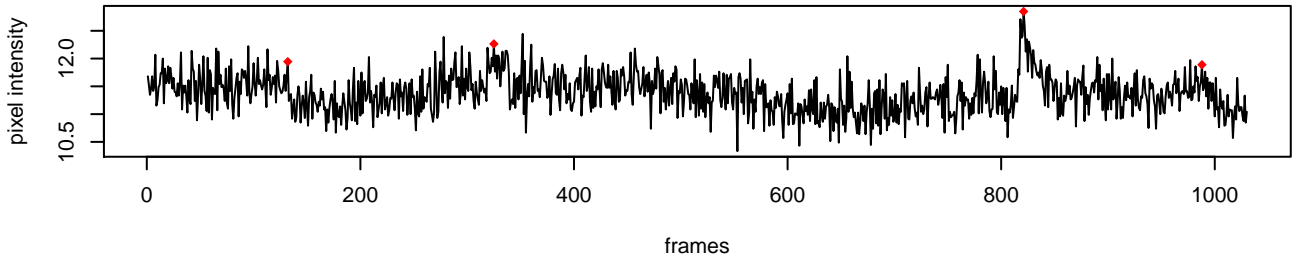

**Graph 5 , 32    Total Activity 3    Position in Array 49**

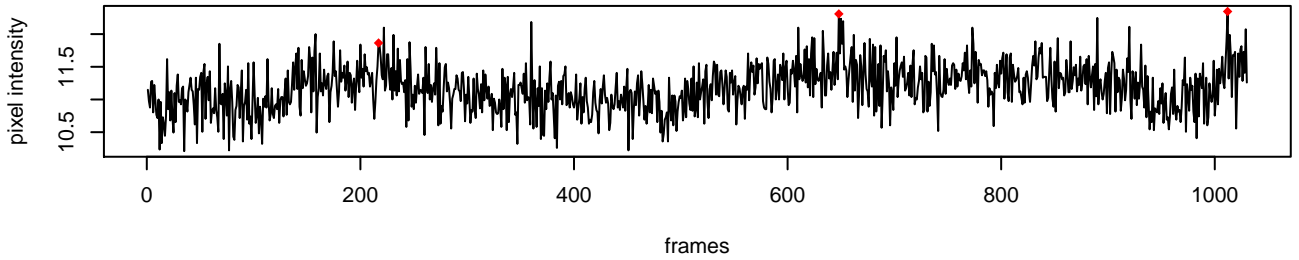

**Graph 6 , 32    Total Activity 3    Position in Array 50**

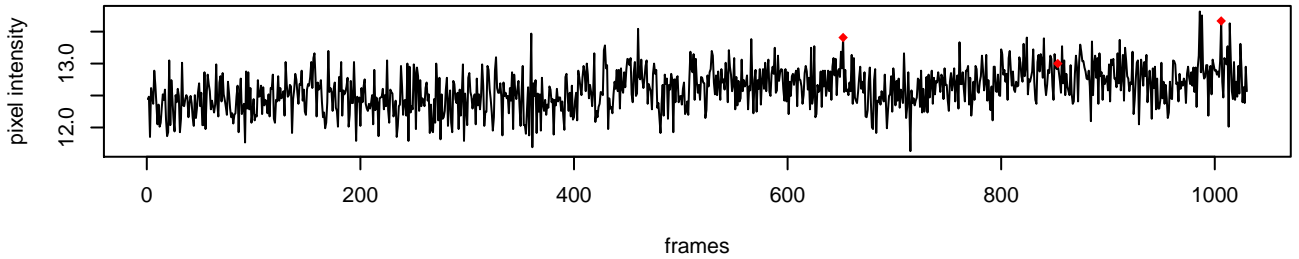

**Graph 20 , 32    Total Activity 22    Position in Array 64**

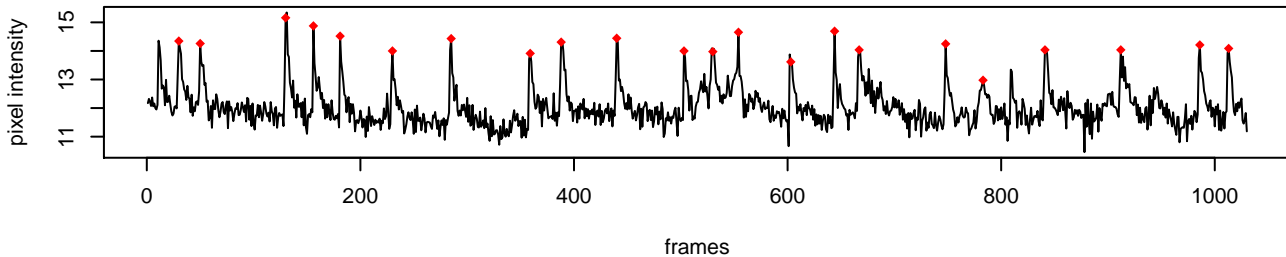

**Graph 24 , 32    Total Activity 4    Position in Array 68**

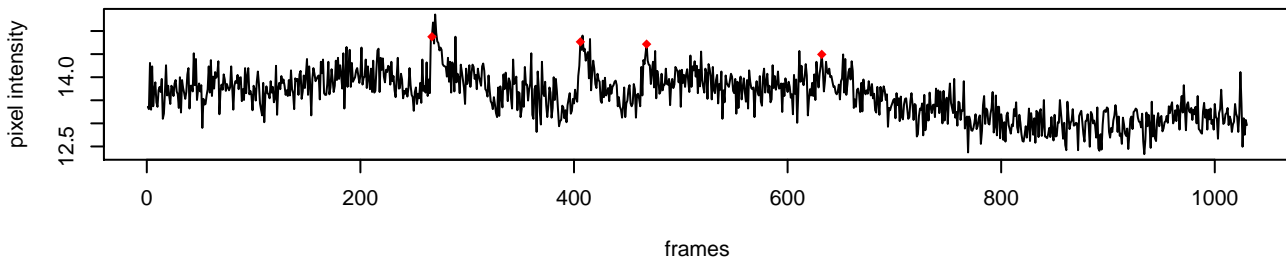

**Graph 27 , 32    Total Activity 3    Position in Array 71**

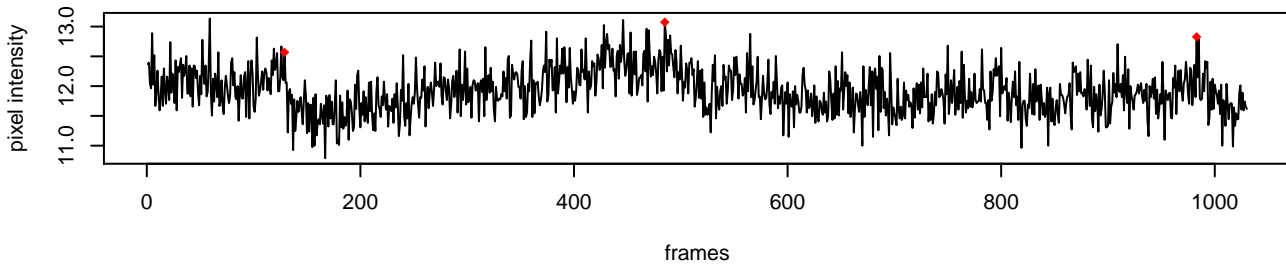

**Graph 30 , 32    Total Activity 2    Position in Array 74**

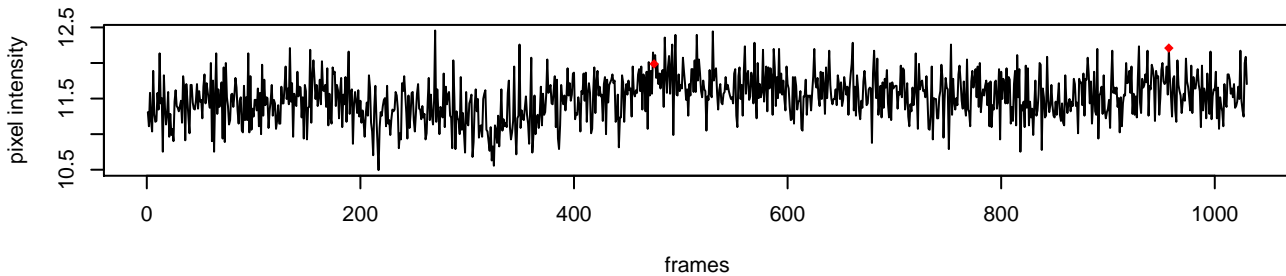

**Graph 38 , 32    Total Activity 2    Position in Array 82**

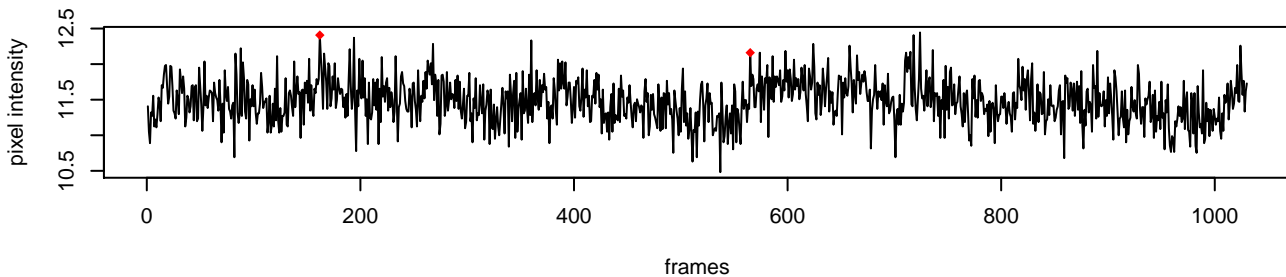

**Graph 1 , 31    Total Activity 2    Position in Array 89**

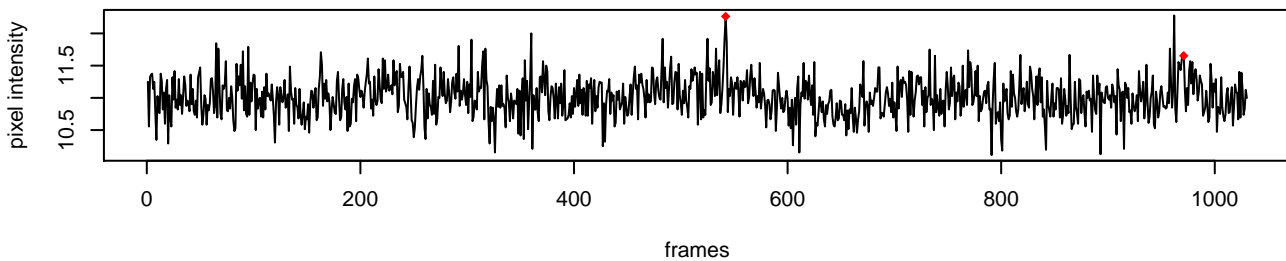

**Graph 3 , 31    Total Activity 3    Position in Array 91**

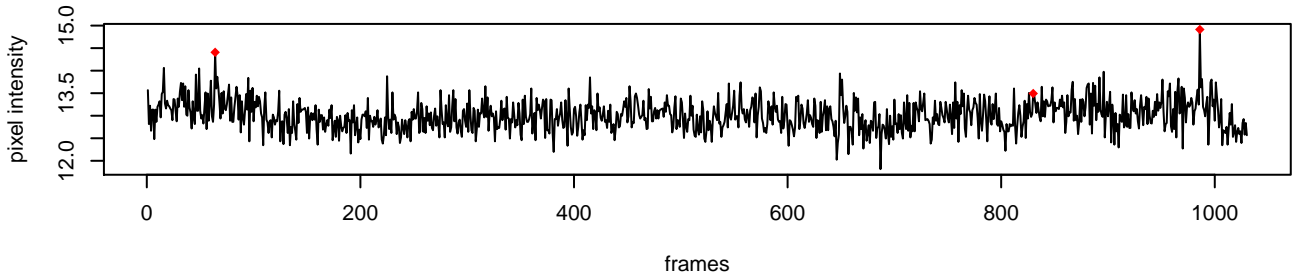

**Graph 15 , 31    Total Activity 2    Position in Array 103**

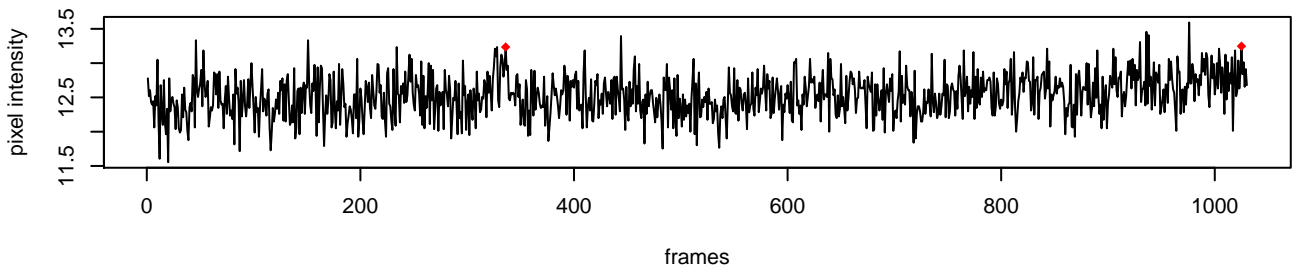

**Graph 22 , 31    Total Activity 4    Position in Array 110**

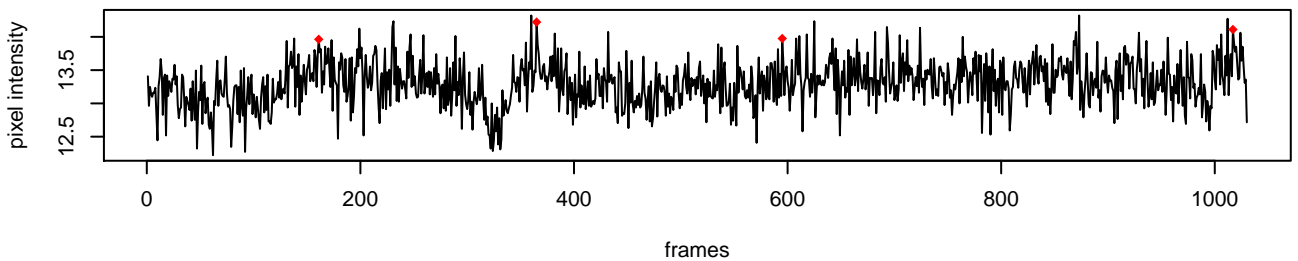



**Graph 26 , 31    Total Activity 3    Position in Array 114**

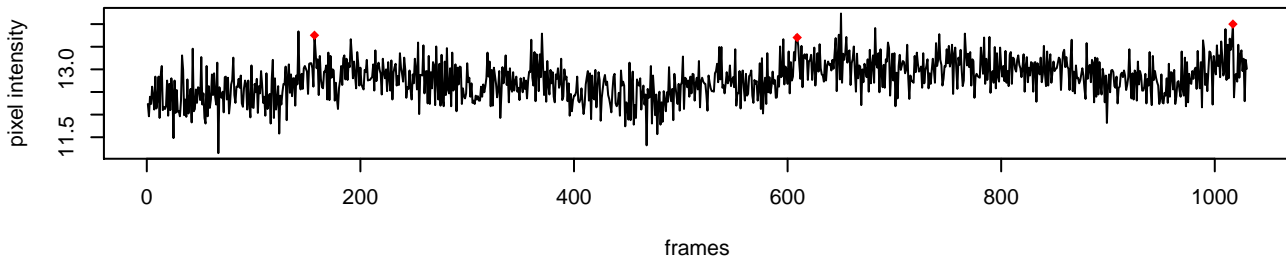

**Graph 30 , 31    Total Activity 3    Position in Array 118**

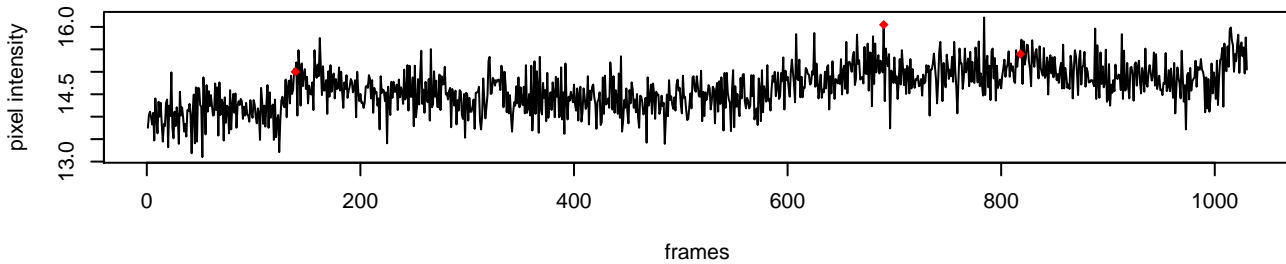

**Graph 31 , 31    Total Activity 4    Position in Array 119**

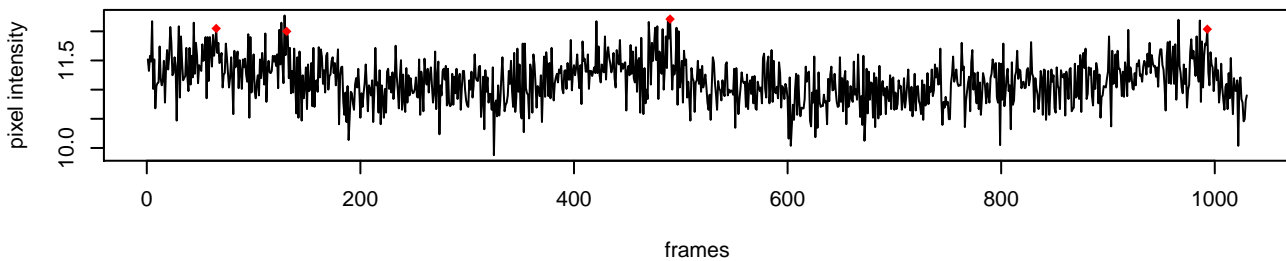

**Graph 33 , 31    Total Activity 3    Position in Array 121**

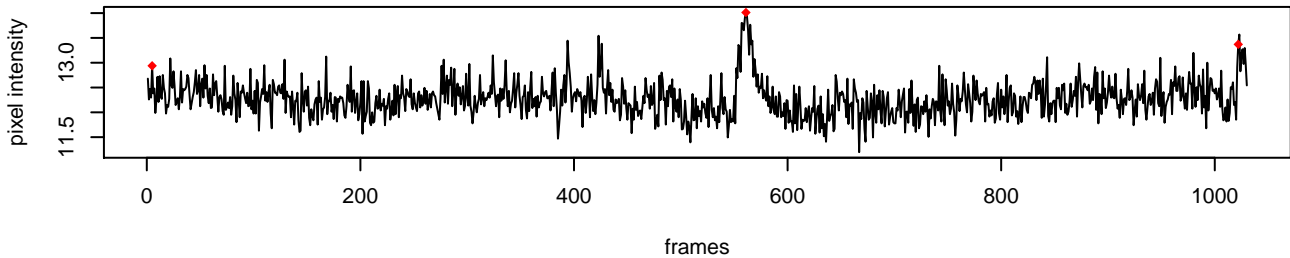

**Graph 37 , 31    Total Activity 3    Position in Array 125**

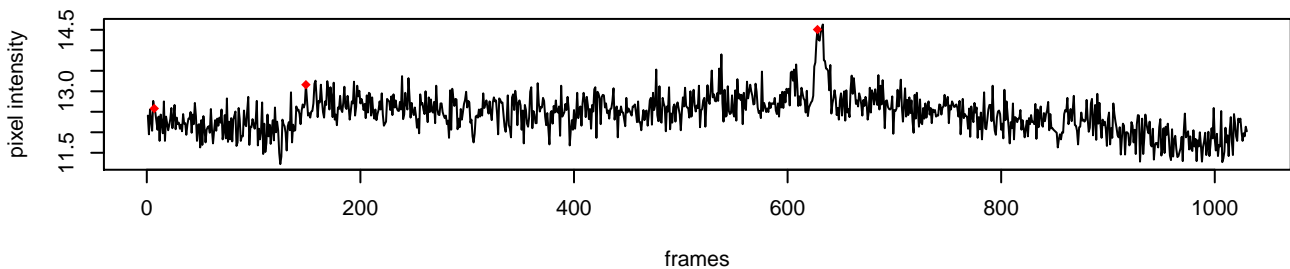

**Graph 21 , 30    Total Activity 5    Position in Array 153**

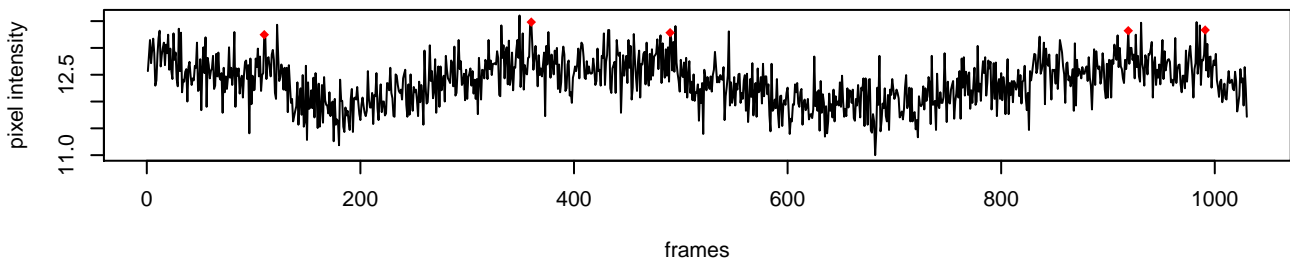

**Graph 23 , 30    Total Activity 2    Position in Array 155**

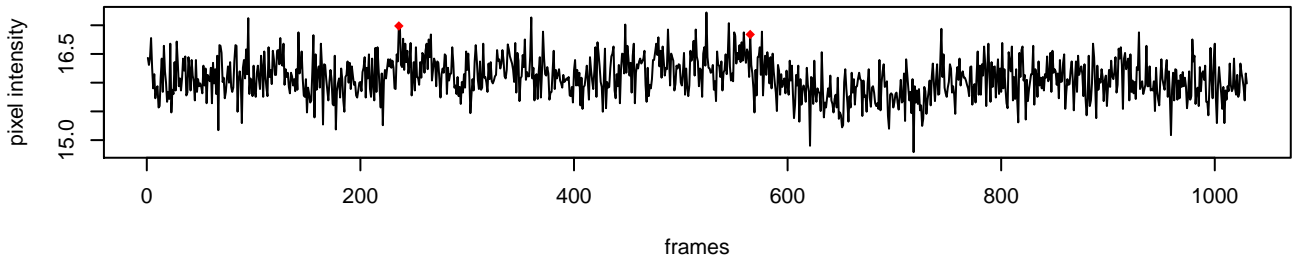

**Graph 38 , 30    Total Activity 3    Position in Array 170**

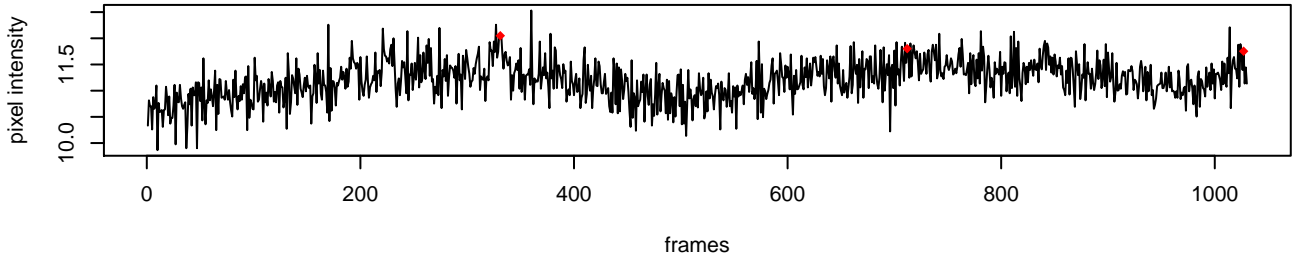

**Graph 41 , 30    Total Activity 3    Position in Array 173**

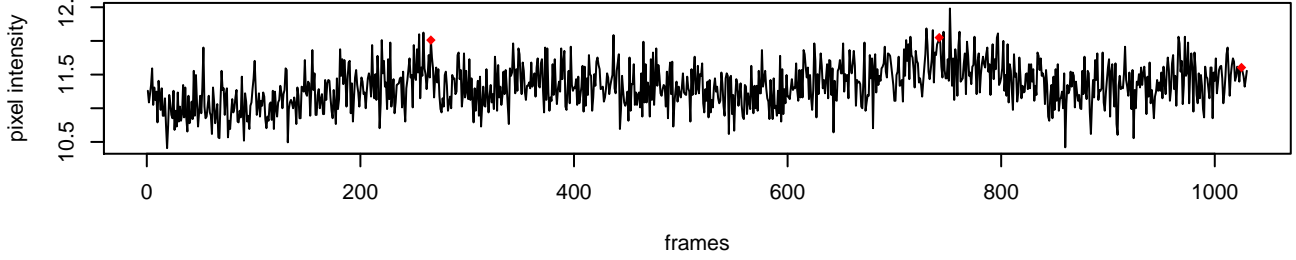

**Graph 2 , 29    Total Activity 3    Position in Array 178**

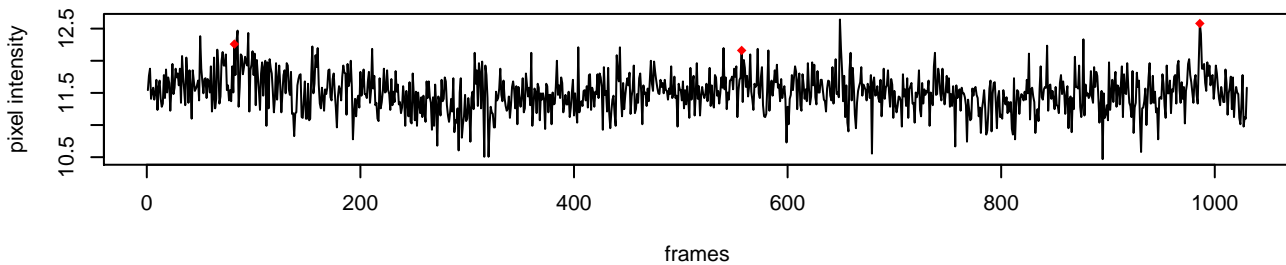

**Graph 24 , 29    Total Activity 2    Position in Array 200**

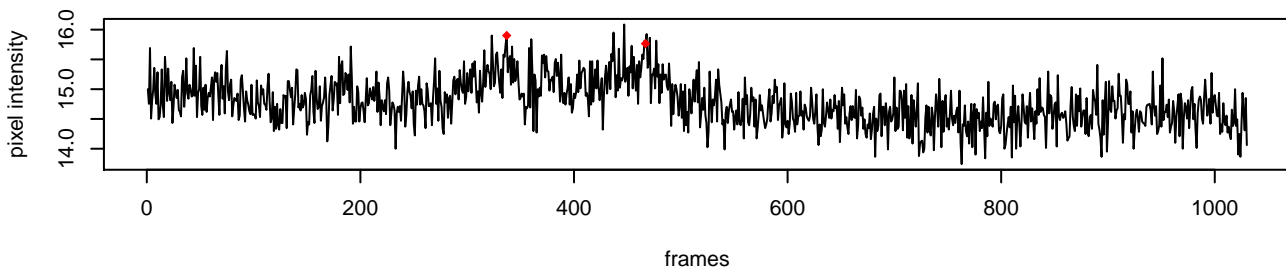

**Graph 25 , 29    Total Activity 16    Position in Array 201**

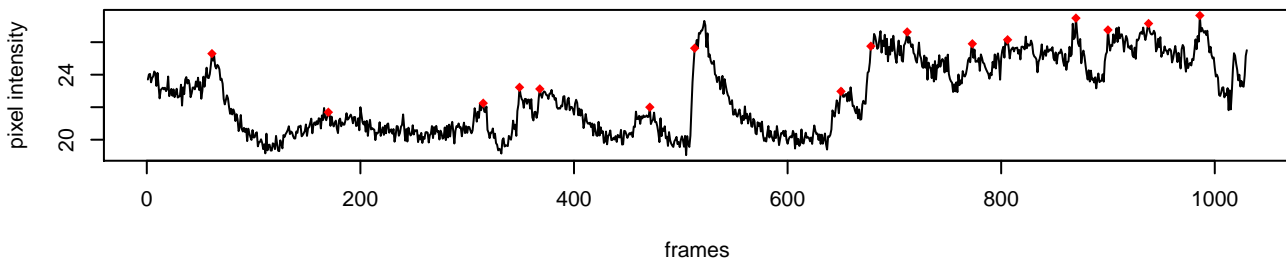

**Graph 26 , 29    Total Activity 5    Position in Array 202**

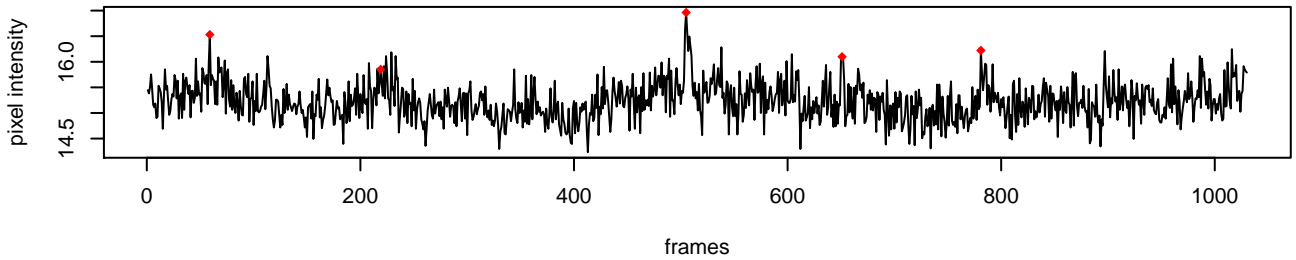

**Graph 27 , 29    Total Activity 3    Position in Array 203**

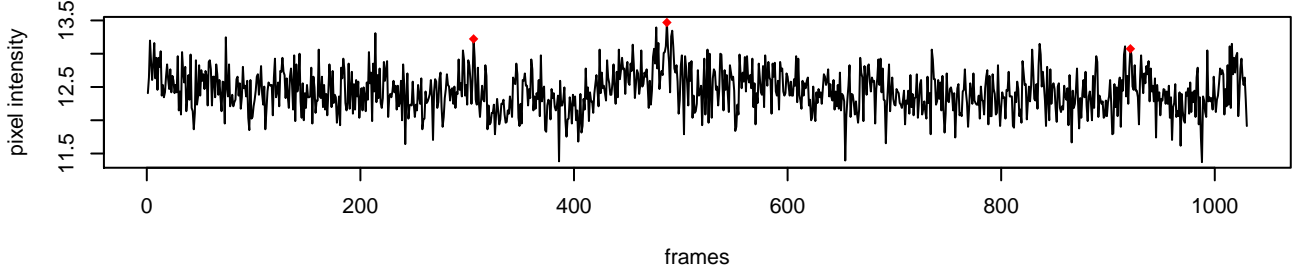

**Graph 31 , 29    Total Activity 3    Position in Array 207**

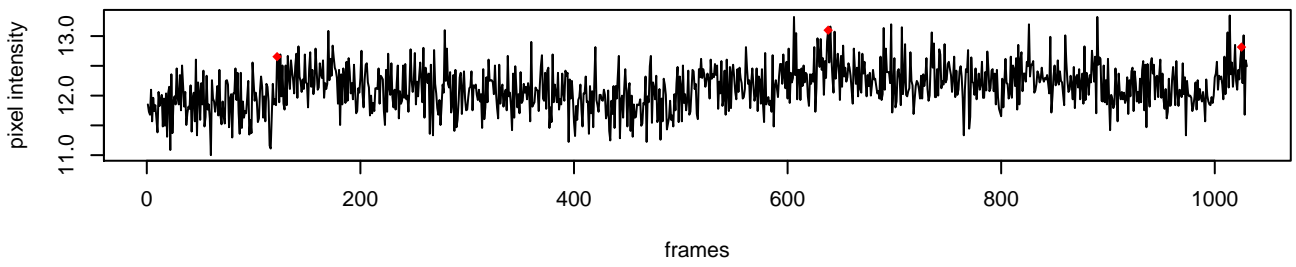

**Graph 33 , 29    Total Activity 4    Position in Array 209**

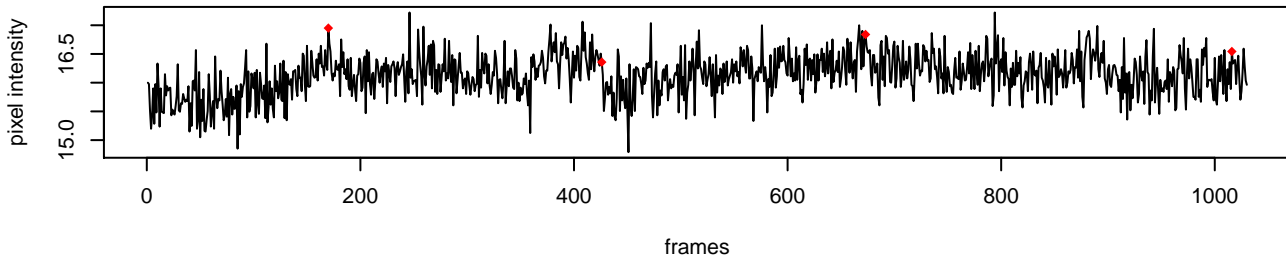

**Graph 41 , 29    Total Activity 3    Position in Array 217**

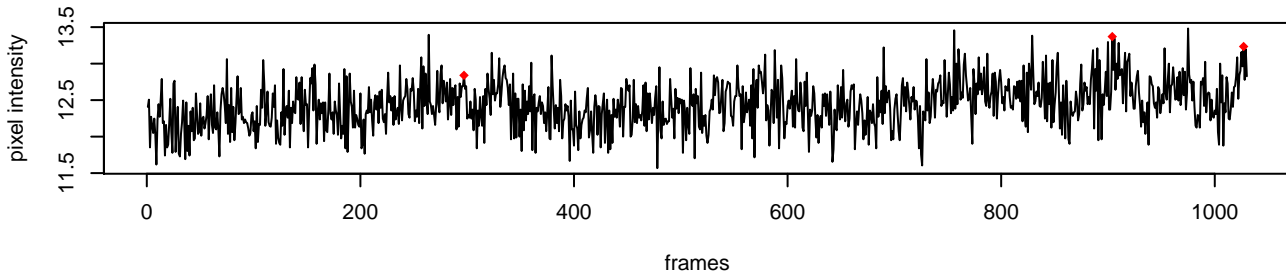

**Graph 43 , 29    Total Activity 4    Position in Array 219**

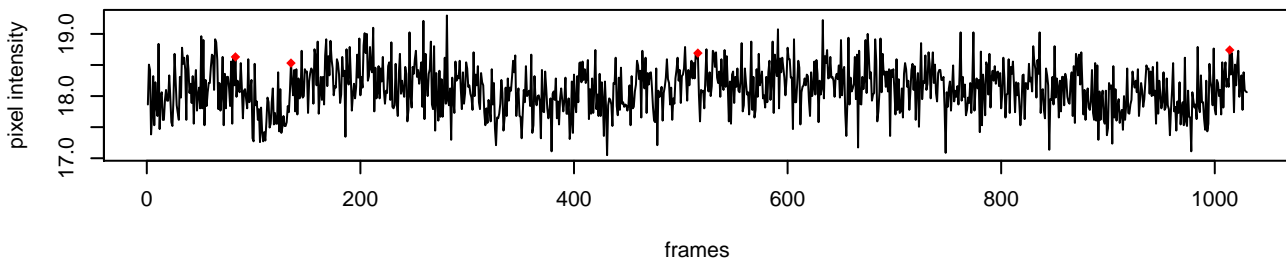

**Graph 2 , 28    Total Activity 2    Position in Array 222**

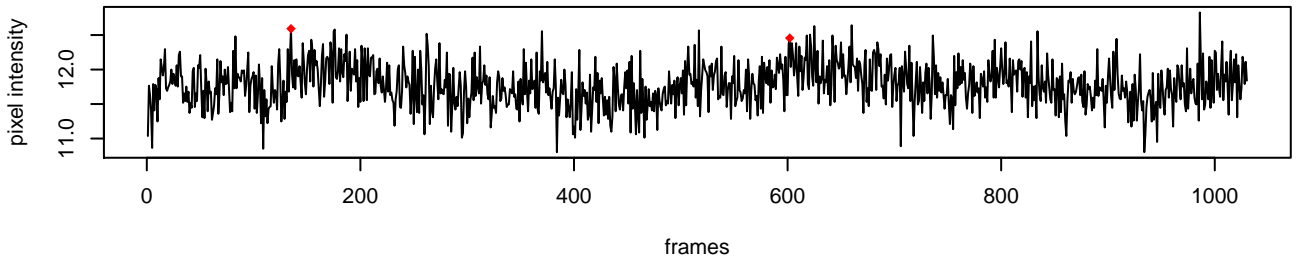

**Graph 23 , 28    Total Activity 5    Position in Array 243**

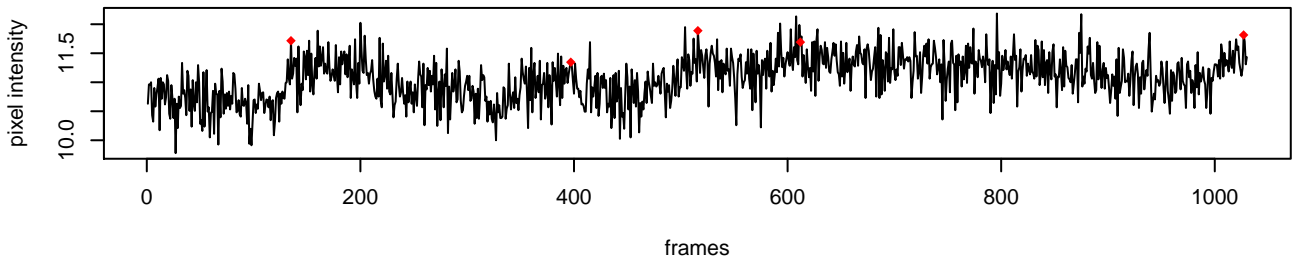

**Graph 24 , 28    Total Activity 2    Position in Array 244**

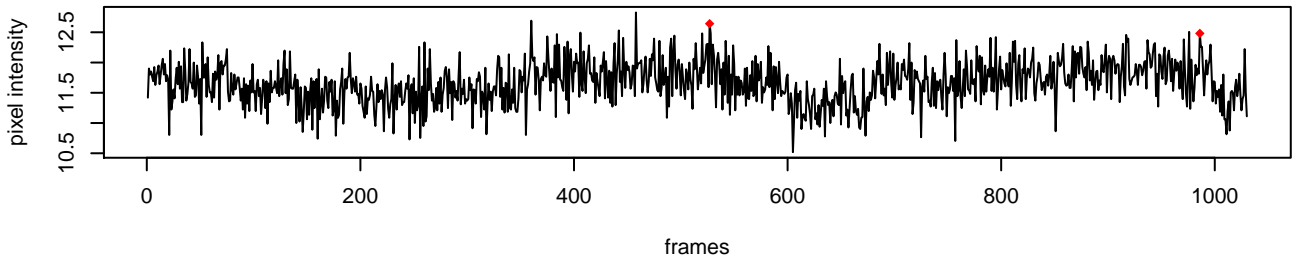

**Graph 25 , 28    Total Activity 4    Position in Array 245**

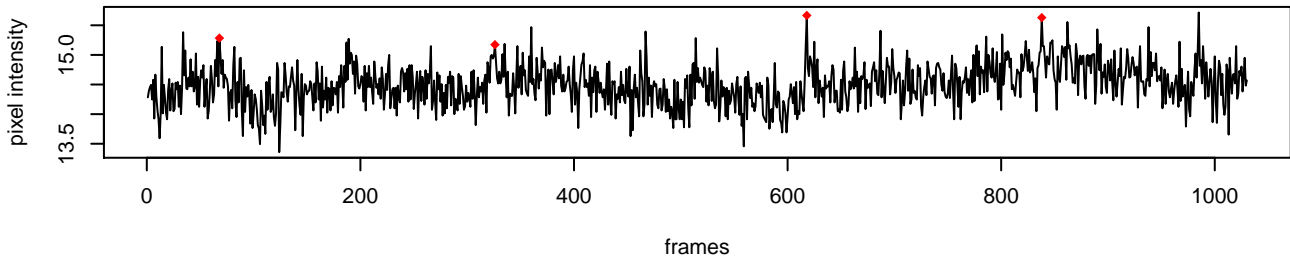

**Graph 26 , 28    Total Activity 2    Position in Array 246**

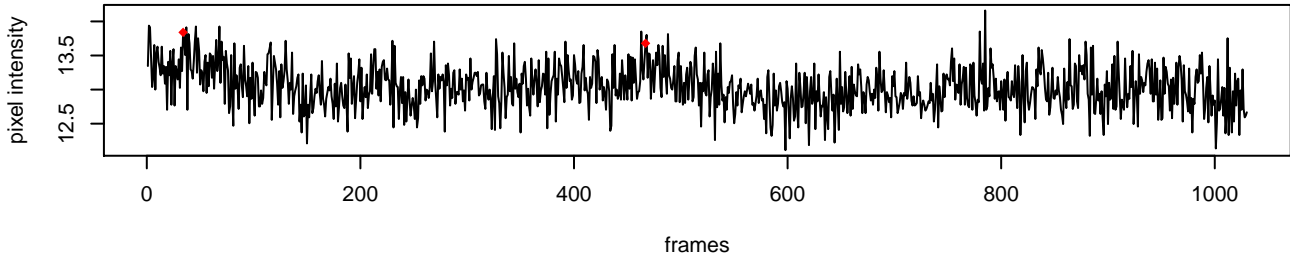

**Graph 27 , 28    Total Activity 2    Position in Array 247**

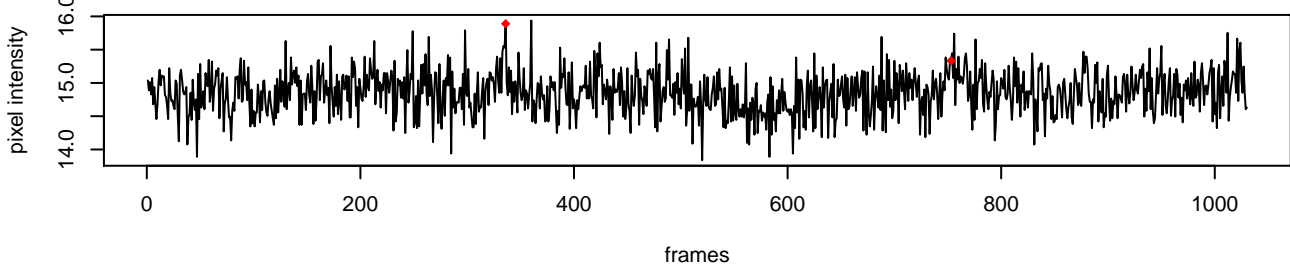



**Graph 28 , 28    Total Activity 2    Position in Array 248**

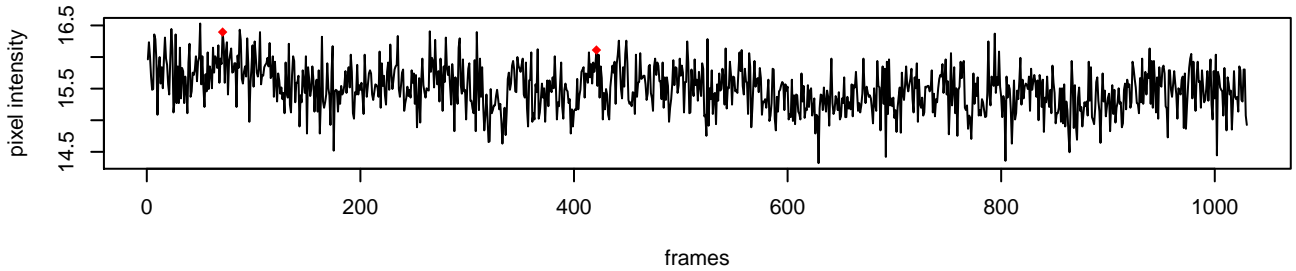

**Graph 32 , 28    Total Activity 2    Position in Array 252**

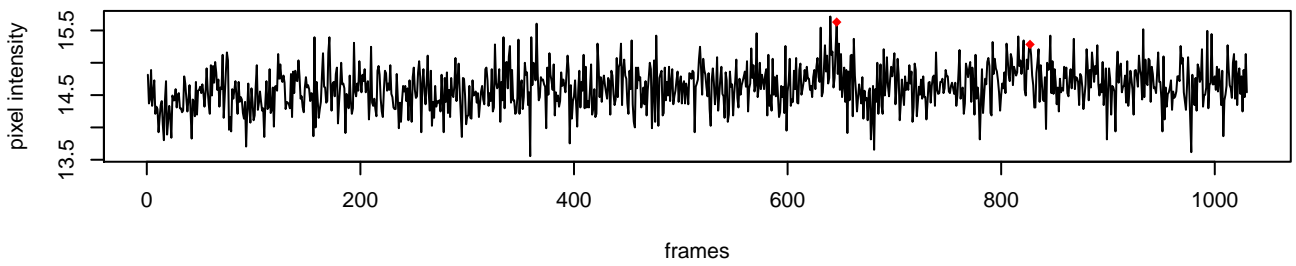

**Graph 33 , 28    Total Activity 3    Position in Array 253**

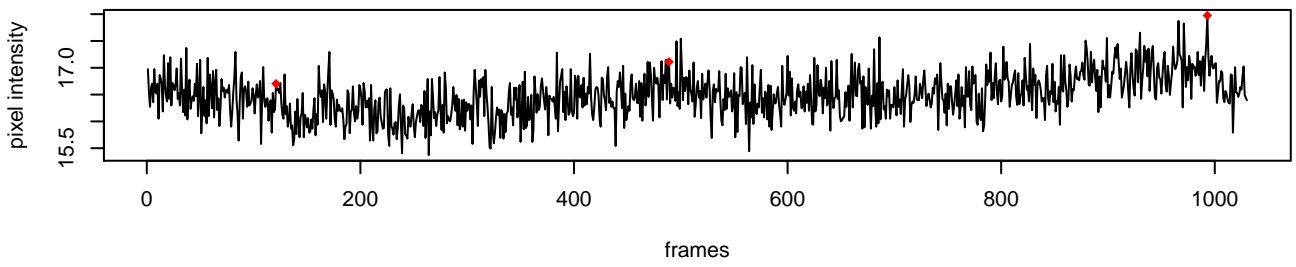

**Graph 39 , 28    Total Activity 4    Position in Array 259**

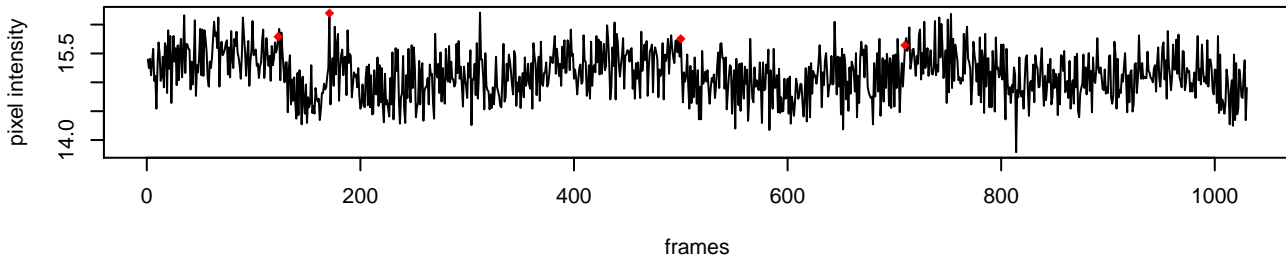

**Graph 3 , 27    Total Activity 3    Position in Array 267**

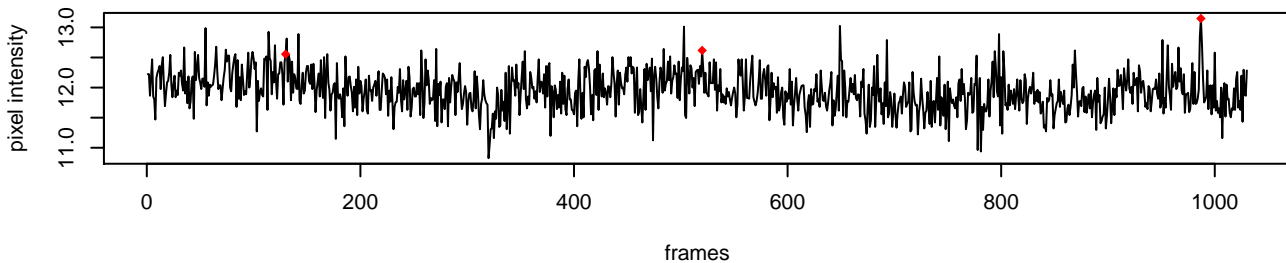

**Graph 5 , 27    Total Activity 5    Position in Array 269**

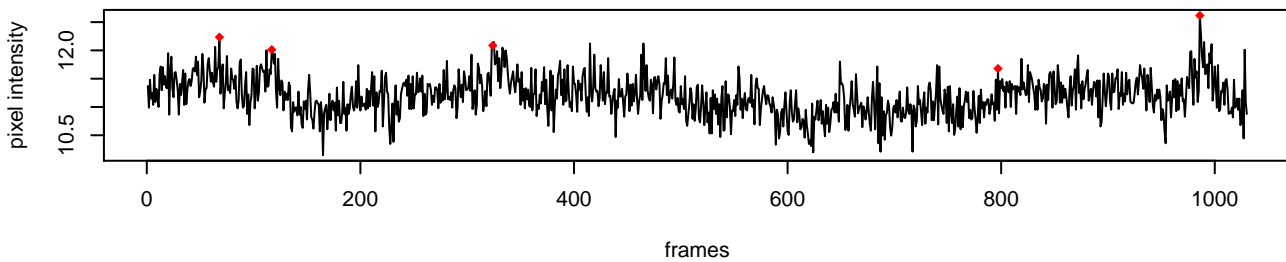

**Graph 22 , 27    Total Activity 2    Position in Array 286**

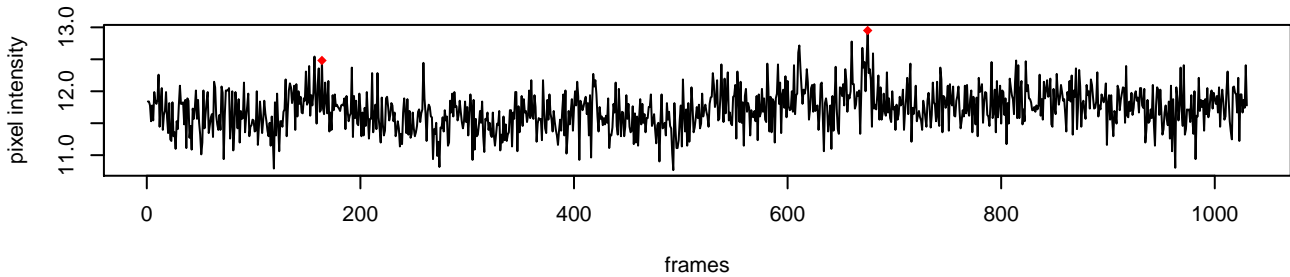

**Graph 28 , 27    Total Activity 4    Position in Array 292**

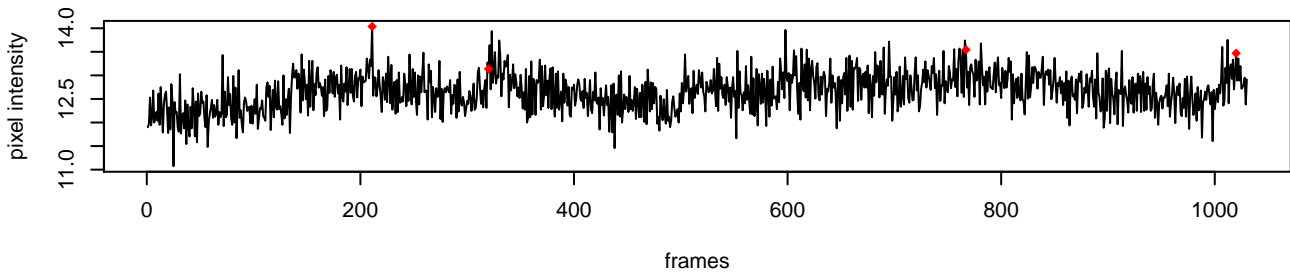

**Graph 29 , 27    Total Activity 3    Position in Array 293**

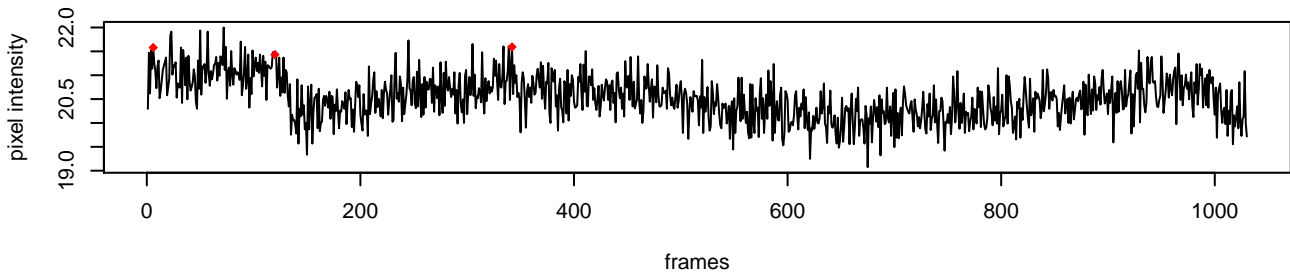

**Graph 30 , 27    Total Activity 6    Position in Array 294**

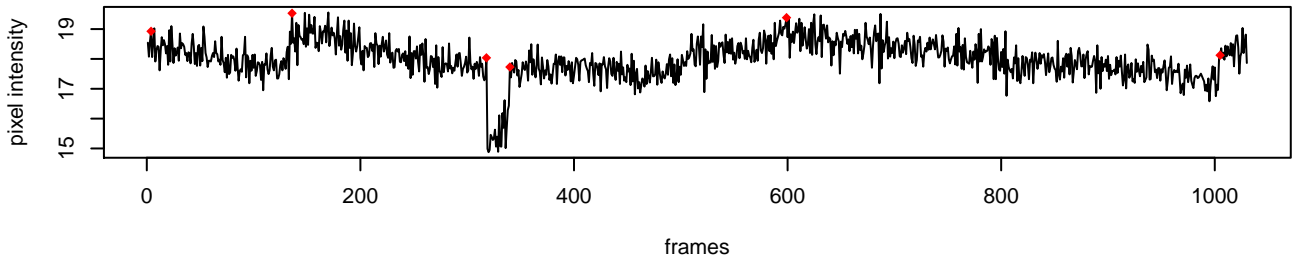

**Graph 32 , 27    Total Activity 4    Position in Array 296**

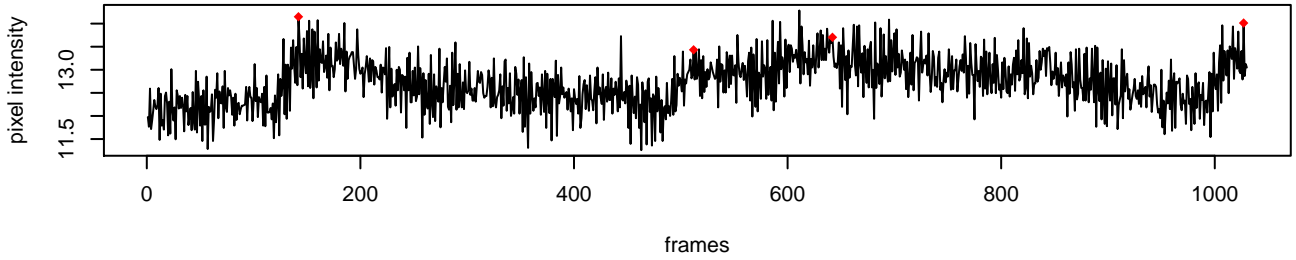

**Graph 33 , 27    Total Activity 4    Position in Array 297**

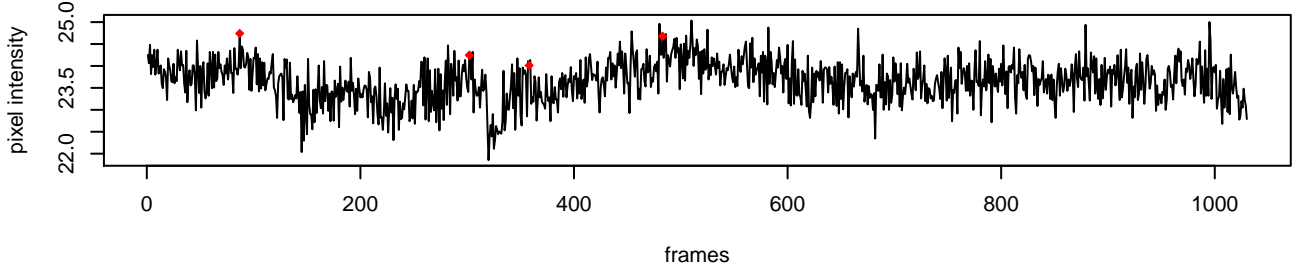

**Graph 37 , 27    Total Activity 5    Position in Array 301**

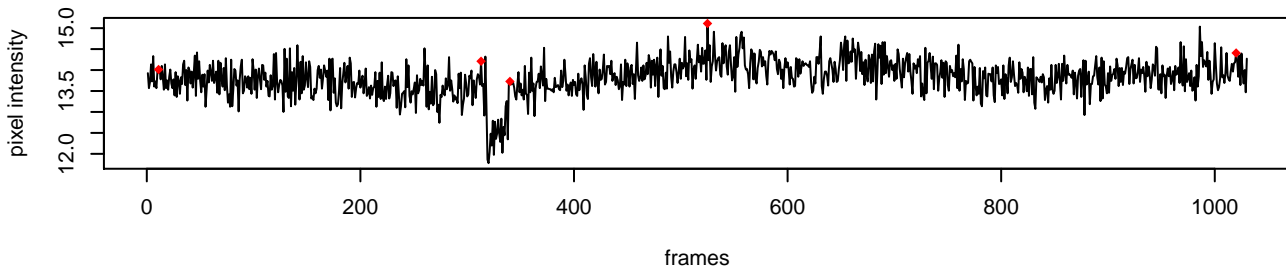

**Graph 38 , 27    Total Activity 2    Position in Array 302**

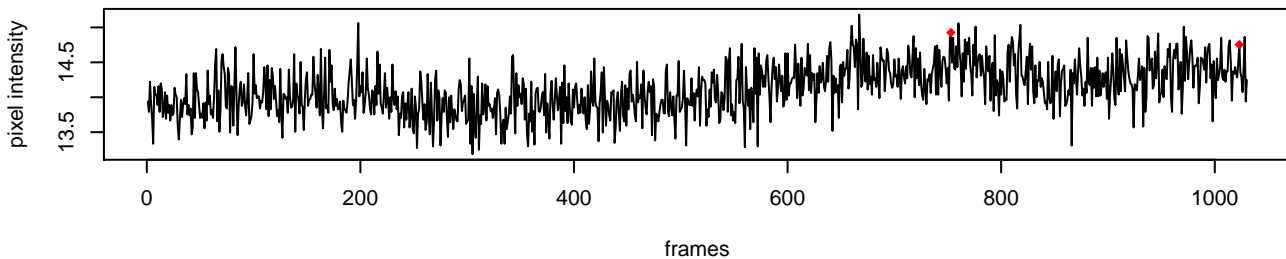

**Graph 39 , 27    Total Activity 3    Position in Array 303**

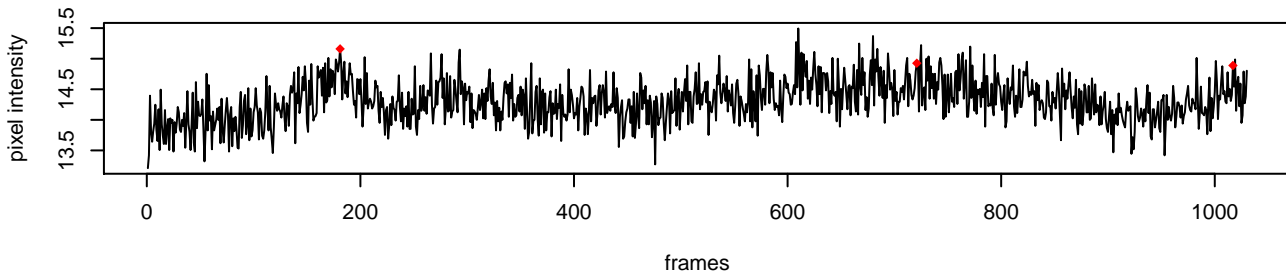

**Graph 40 , 27    Total Activity 2    Position in Array 304**

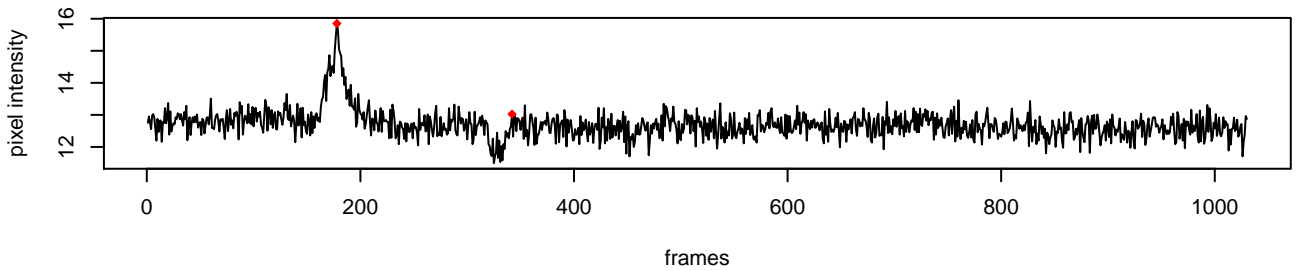

**Graph 41 , 27    Total Activity 6    Position in Array 305**

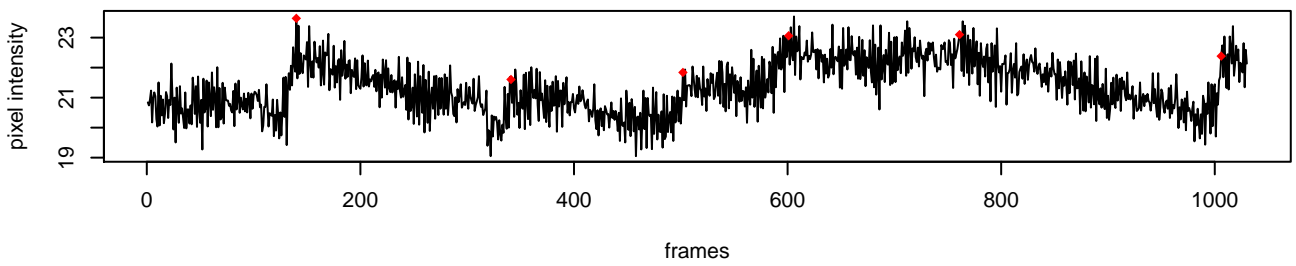

**Graph 42 , 27    Total Activity 2    Position in Array 306**

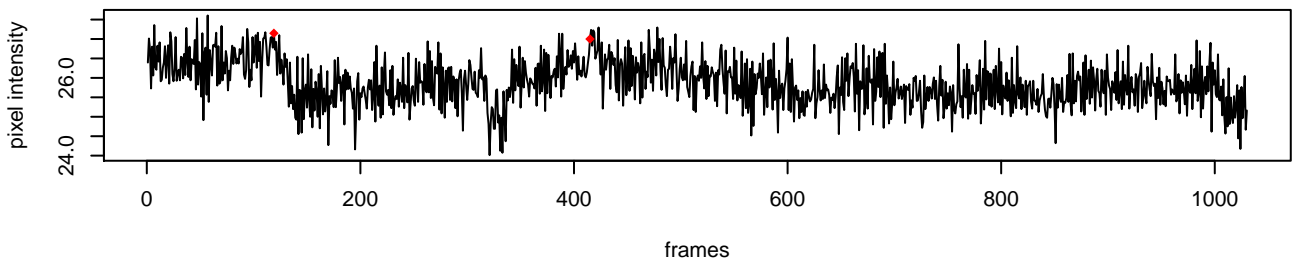

**Graph 1 , 26    Total Activity 5    Position in Array 309**

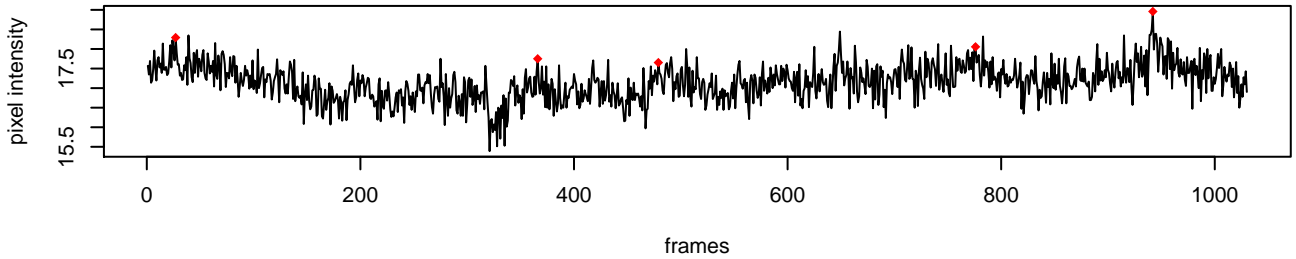

**Graph 2 , 26    Total Activity 6    Position in Array 310**

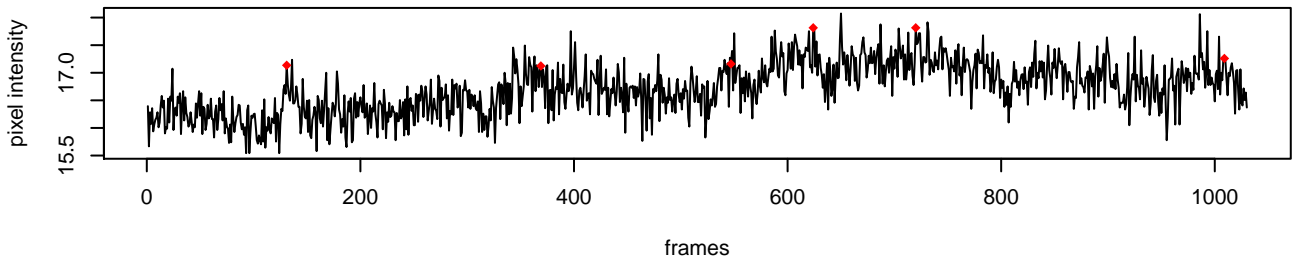

**Graph 3 , 26    Total Activity 3    Position in Array 311**

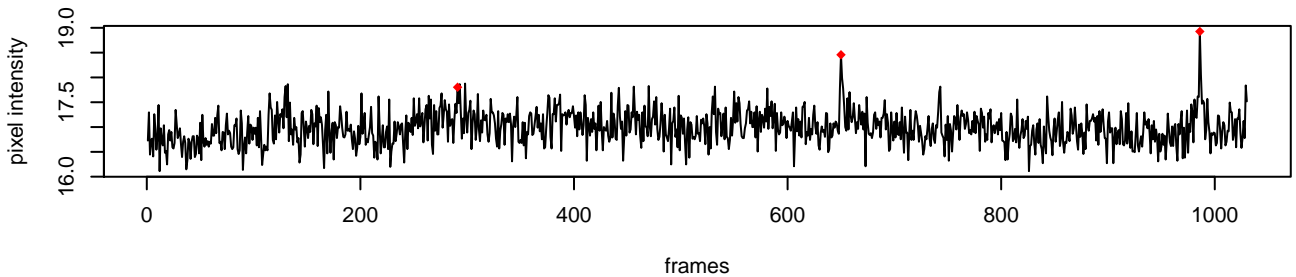

**Graph 21 , 26    Total Activity 2    Position in Array 329**

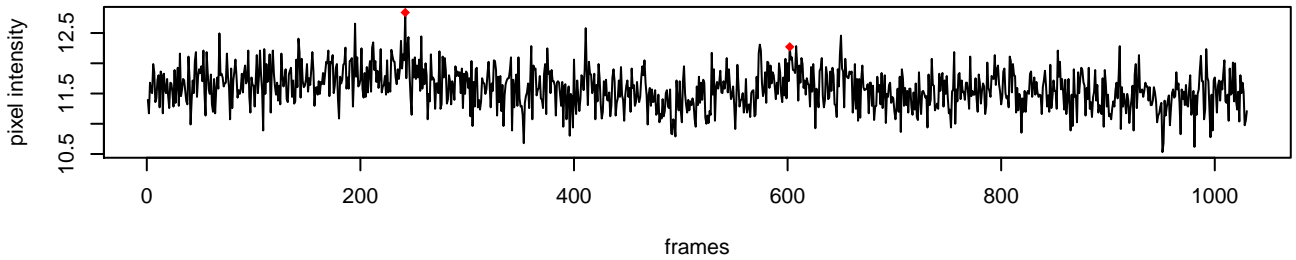

**Graph 30 , 26    Total Activity 4    Position in Array 338**

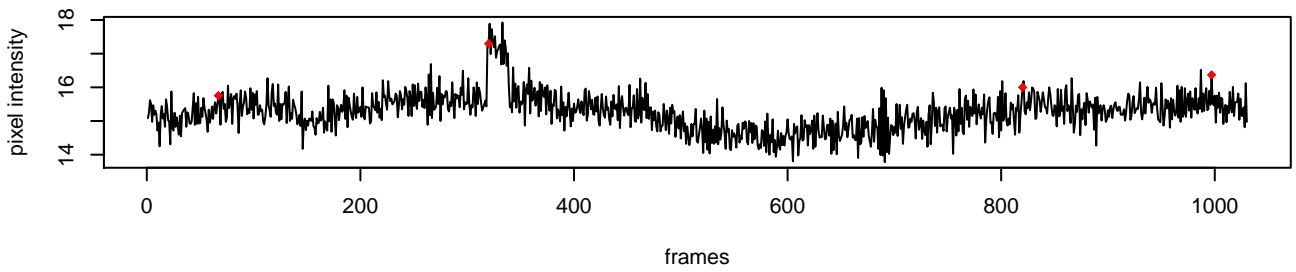

**Graph 31 , 26    Total Activity 2    Position in Array 339**

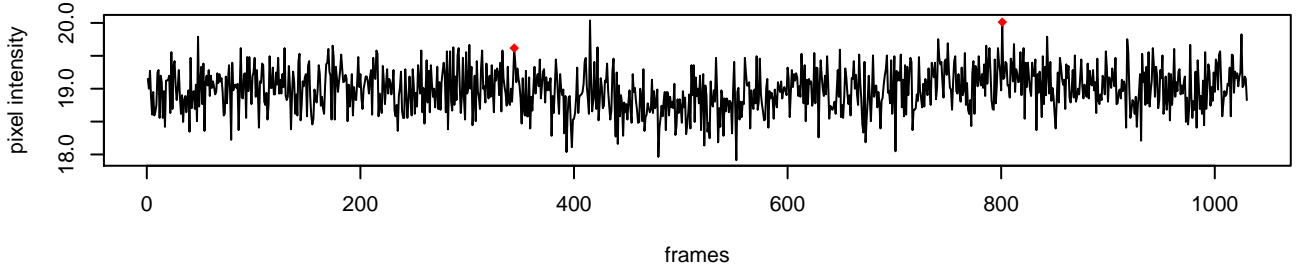



**Graph 32 , 26    Total Activity 3    Position in Array 340**

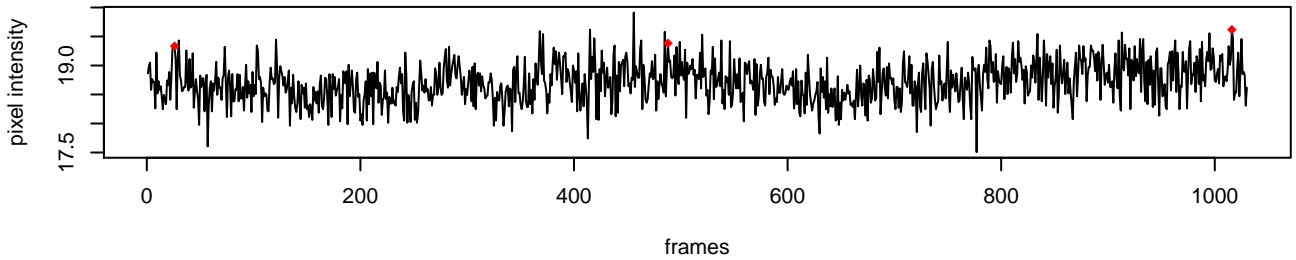

**Graph 33 , 26    Total Activity 6    Position in Array 341**

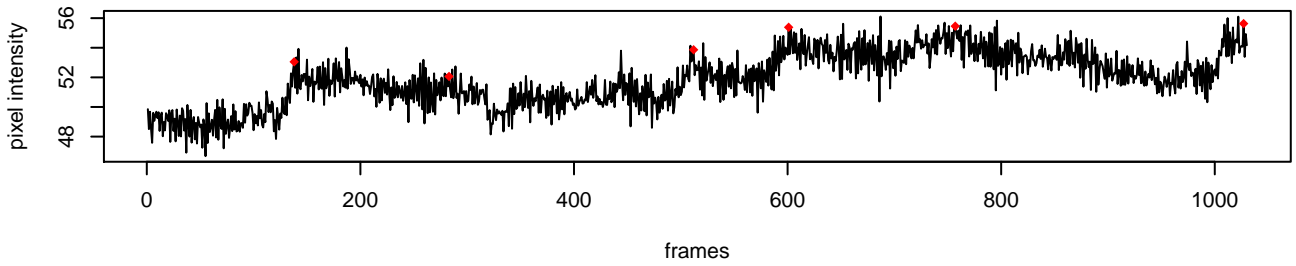

**Graph 34 , 26    Total Activity 6    Position in Array 342**

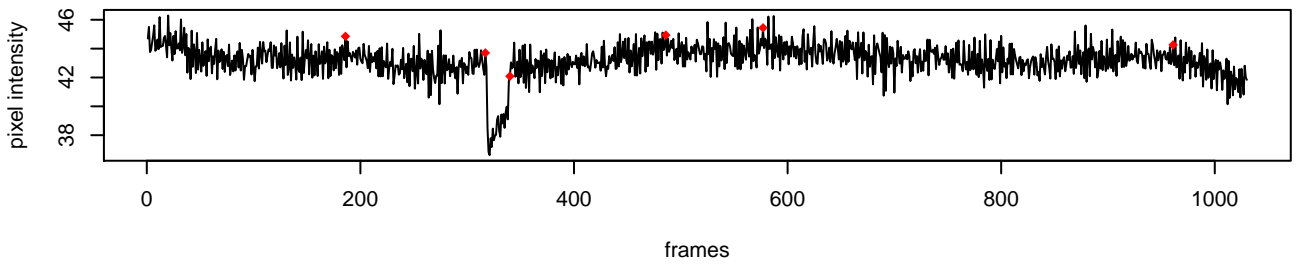

**Graph 35 , 26    Total Activity 5    Position in Array 343**

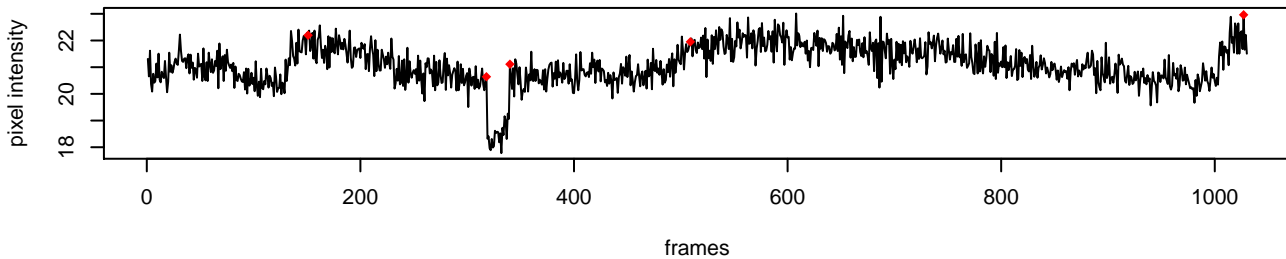

**Graph 36 , 26    Total Activity 6    Position in Array 344**

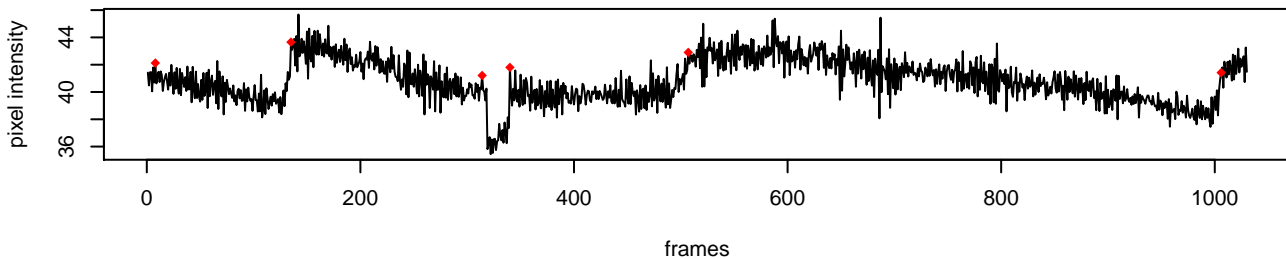

**Graph 37 , 26    Total Activity 7    Position in Array 345**

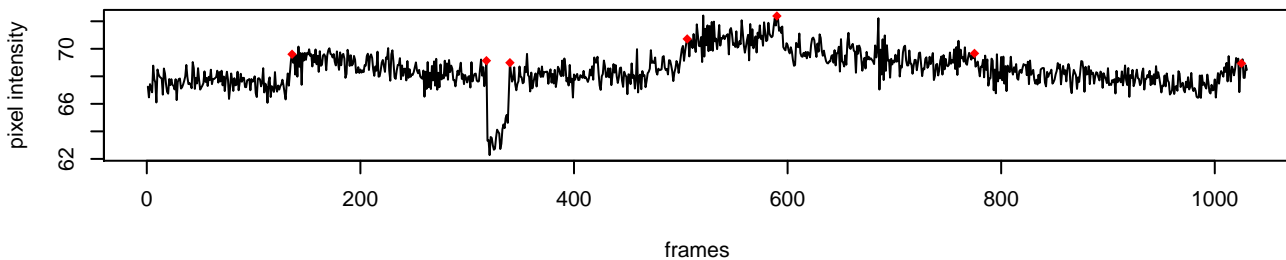

**Graph 38 , 26    Total Activity 5    Position in Array 346**

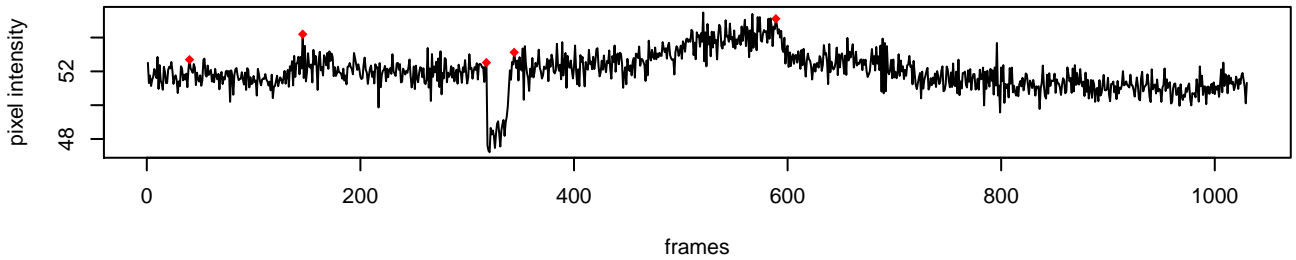

**Graph 39 , 26    Total Activity 5    Position in Array 347**

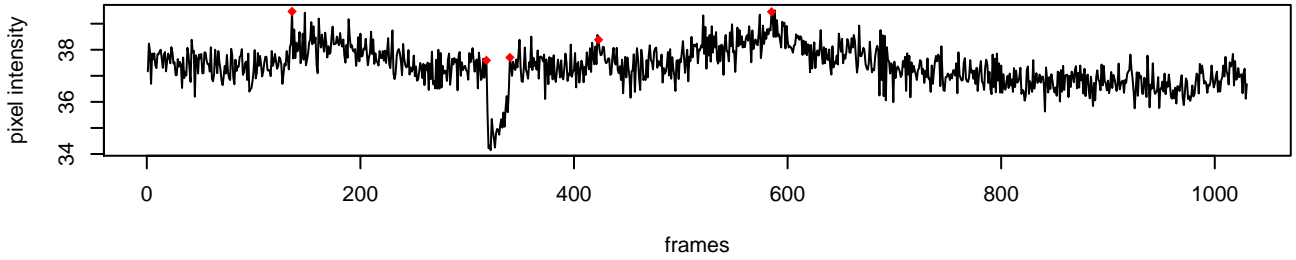

**Graph 40 , 26    Total Activity 7    Position in Array 348**

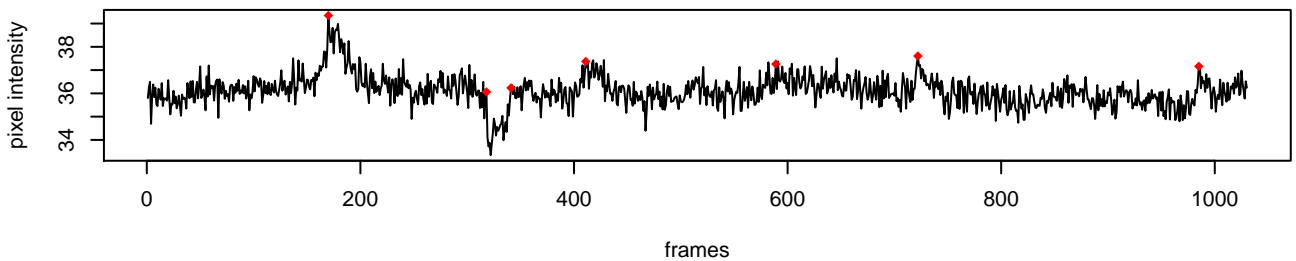

**Graph 41 , 26    Total Activity 5    Position in Array 349**

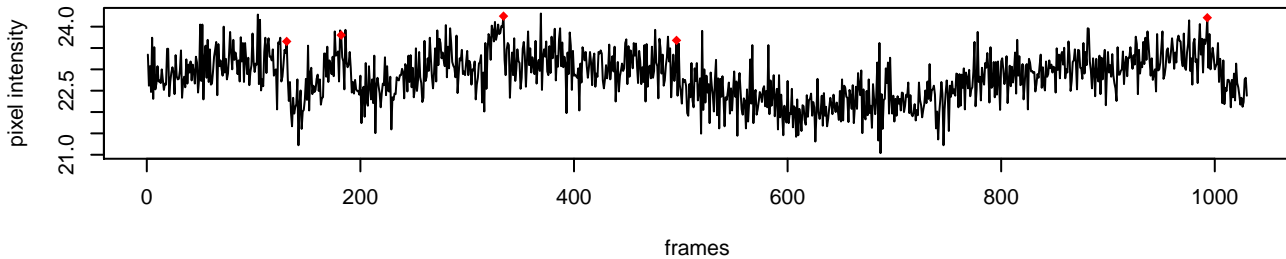

**Graph 42 , 26    Total Activity 3    Position in Array 350**

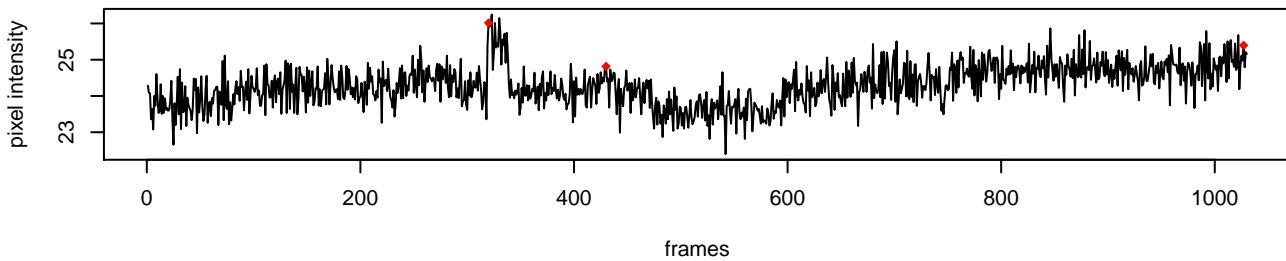

**Graph 43 , 26    Total Activity 4    Position in Array 351**

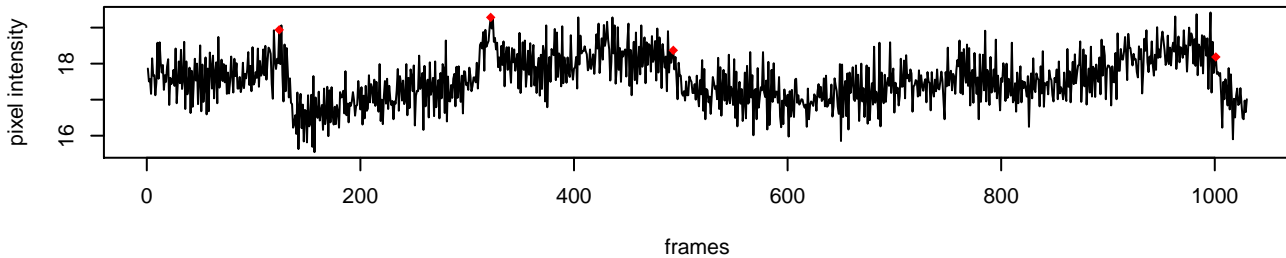

**Graph 1 , 25    Total Activity 4    Position in Array 353**

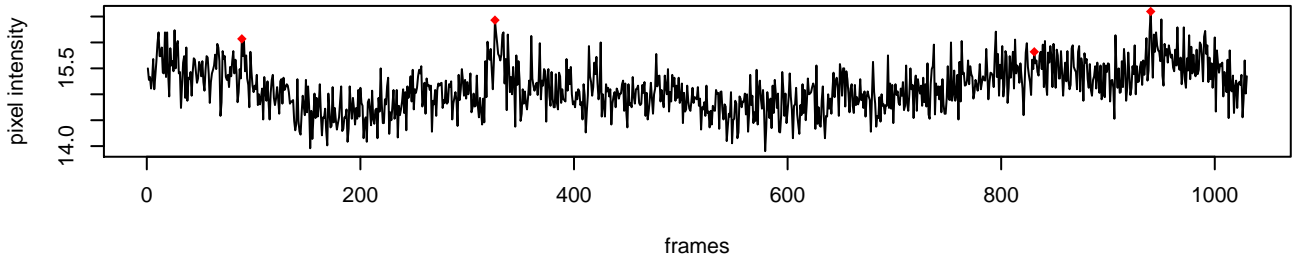

**Graph 2 , 25    Total Activity 3    Position in Array 354**

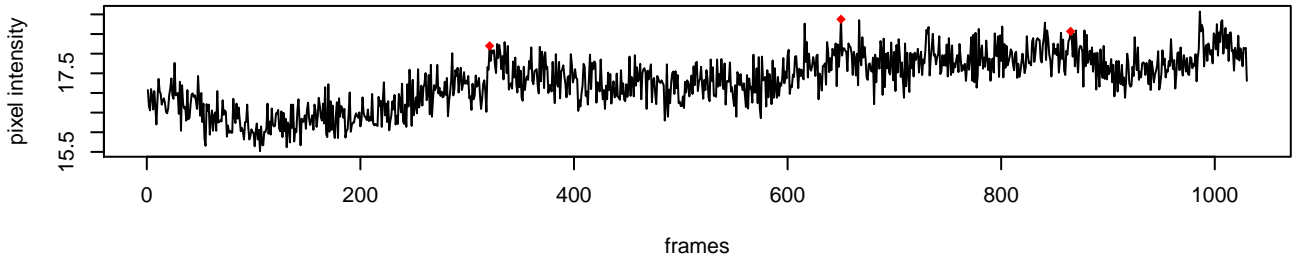

**Graph 3 , 25    Total Activity 7    Position in Array 355**

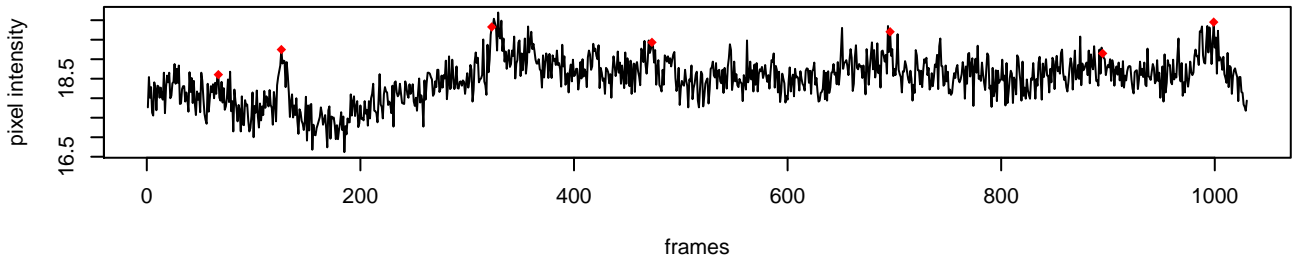

**Graph 10 , 25    Total Activity 5    Position in Array 362**

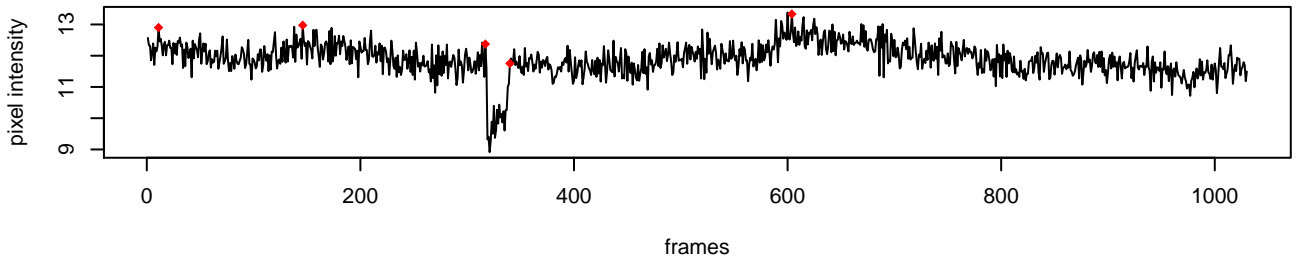

**Graph 20 , 25    Total Activity 2    Position in Array 372**

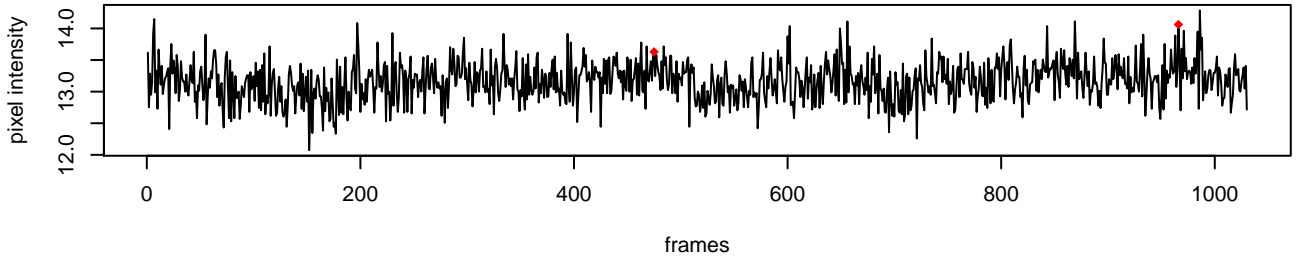

**Graph 24 , 25    Total Activity 17    Position in Array 376**

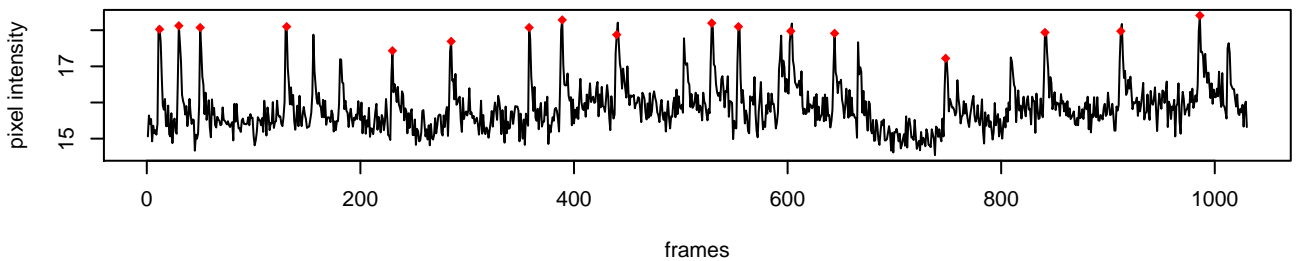

**Graph 33 , 25    Total Activity 5    Position in Array 385**

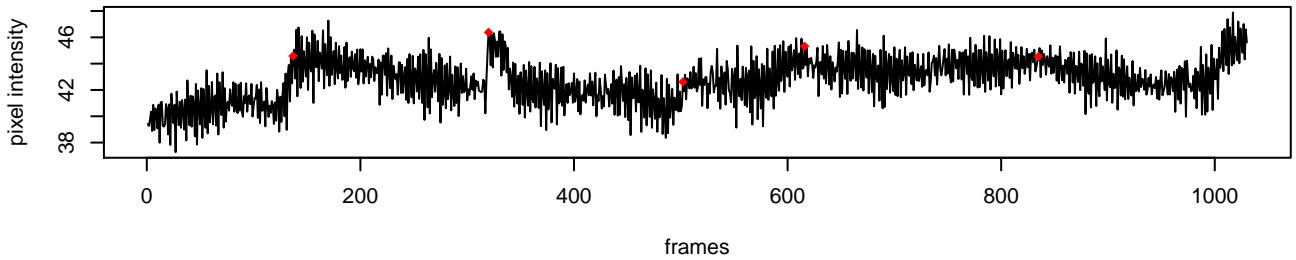

**Graph 34 , 25    Total Activity 5    Position in Array 386**

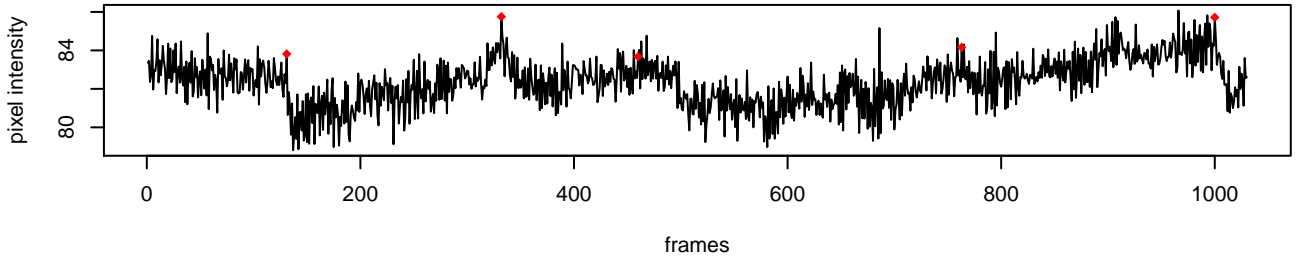

**Graph 35 , 25    Total Activity 5    Position in Array 387**

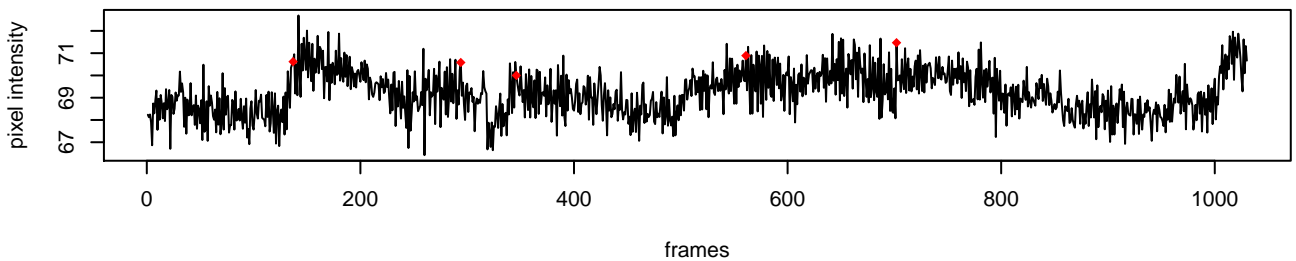

**Graph 36 , 25    Total Activity 6    Position in Array 388**

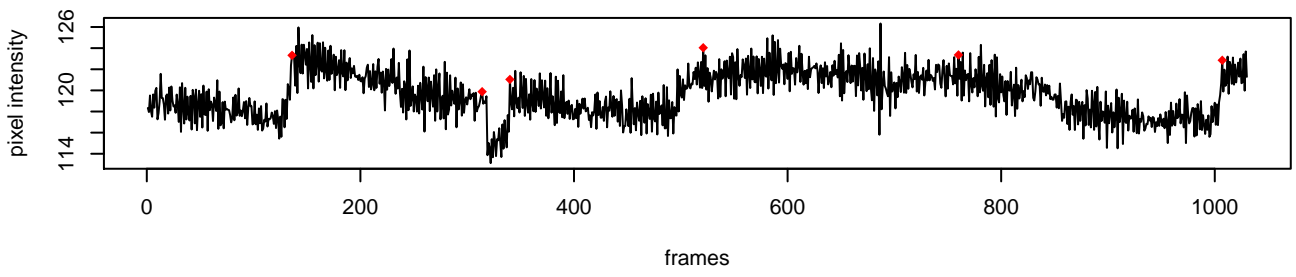

**Graph 37 , 25    Total Activity 7    Position in Array 389**

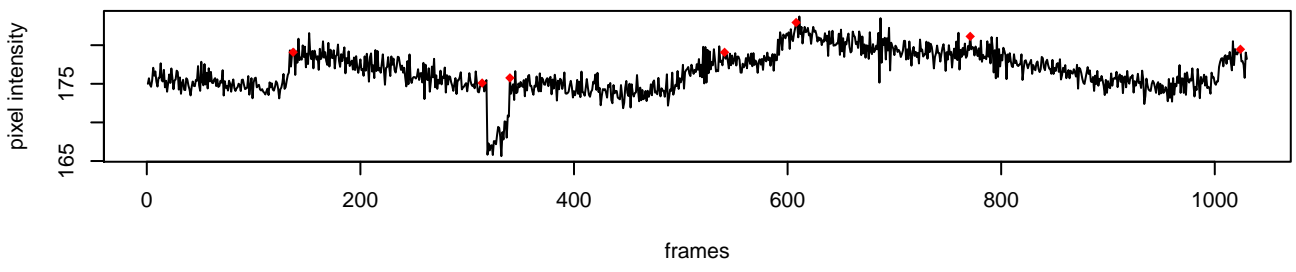

**Graph 38 , 25    Total Activity 3    Position in Array 390**

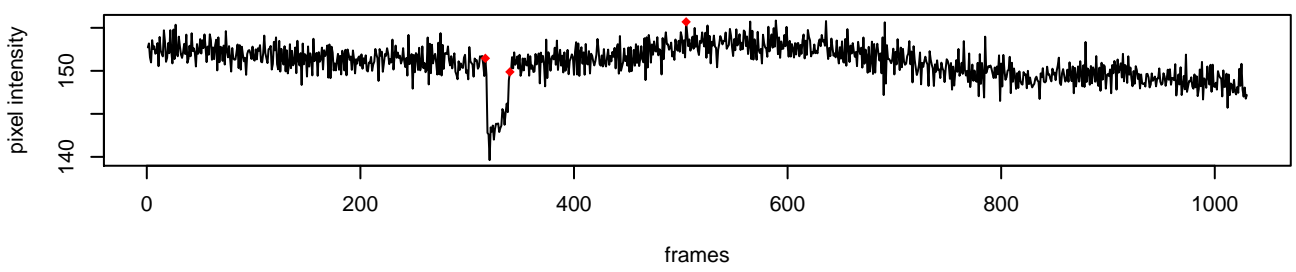



**Graph 39 , 25    Total Activity 6    Position in Array 391**

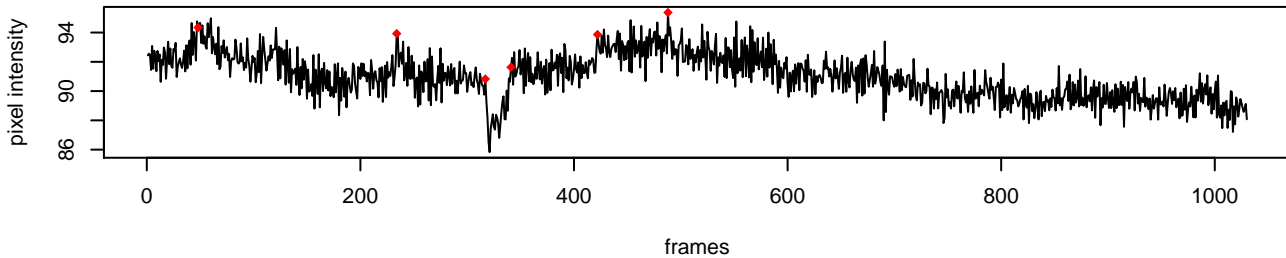

**Graph 40 , 25    Total Activity 4    Position in Array 392**

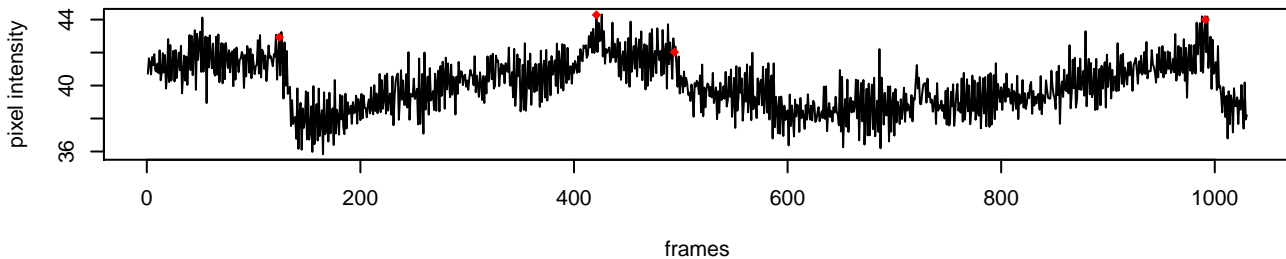

**Graph 42 , 25    Total Activity 3    Position in Array 394**

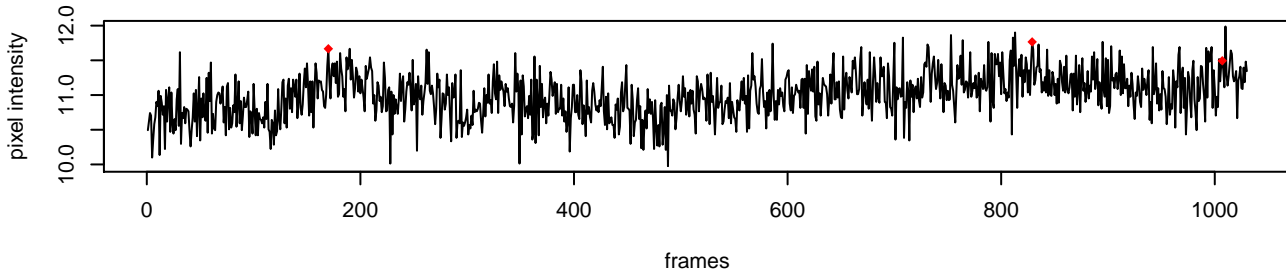

**Graph 1 , 24    Total Activity 3    Position in Array 397**

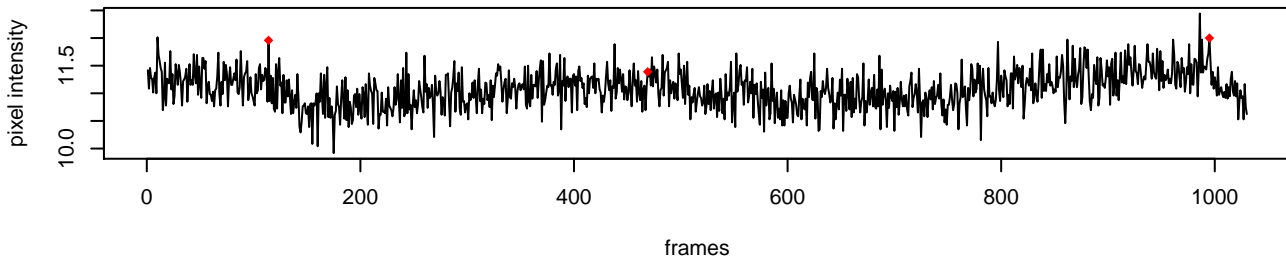

**Graph 2 , 24    Total Activity 4    Position in Array 398**

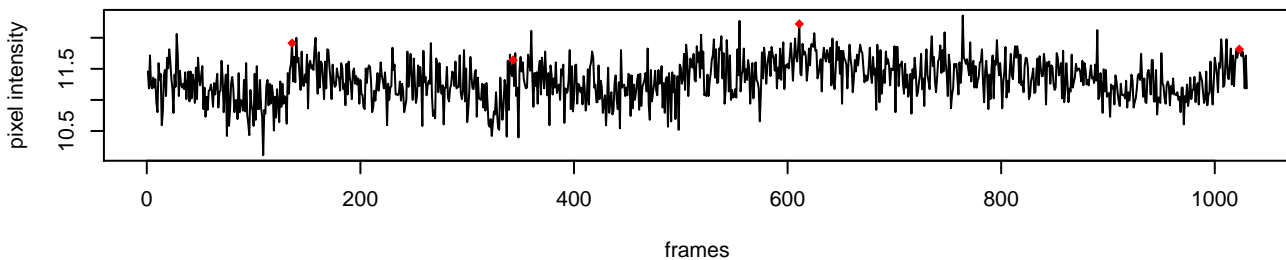

**Graph 3 , 24    Total Activity 6    Position in Array 399**

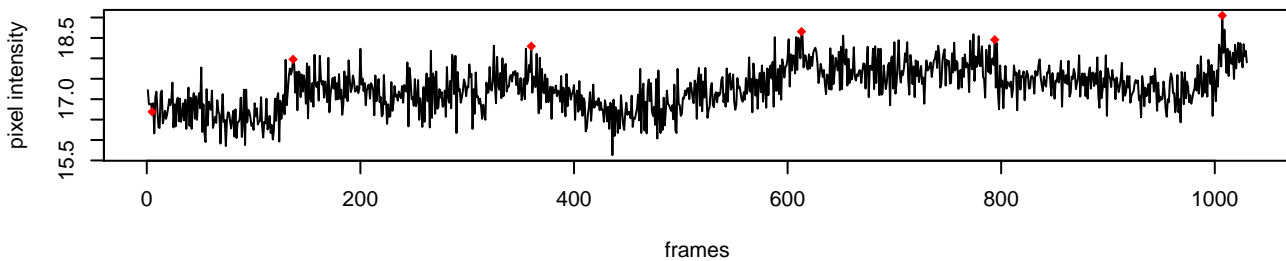

**Graph 4 , 24    Total Activity 3    Position in Array 400**

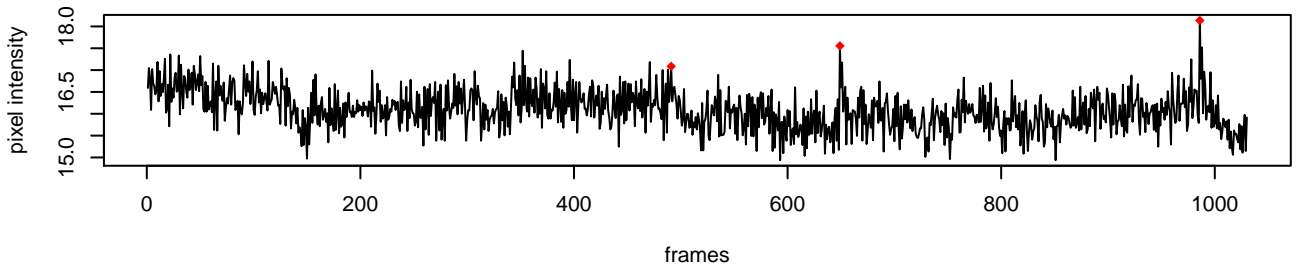

**Graph 10 , 24    Total Activity 4    Position in Array 406**

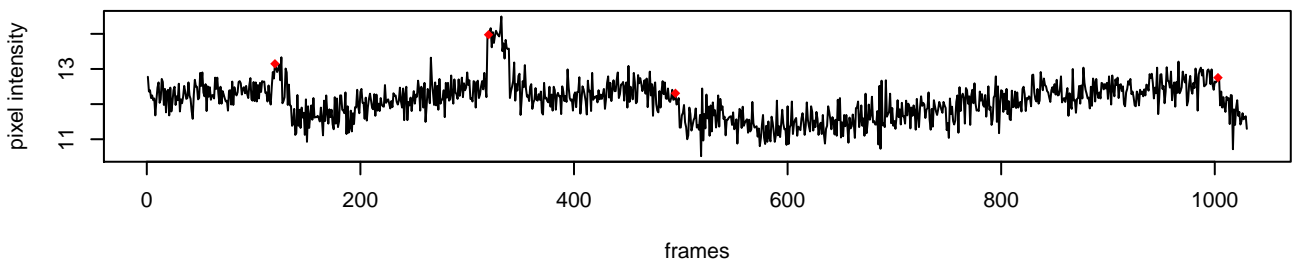

**Graph 15 , 24    Total Activity 2    Position in Array 411**

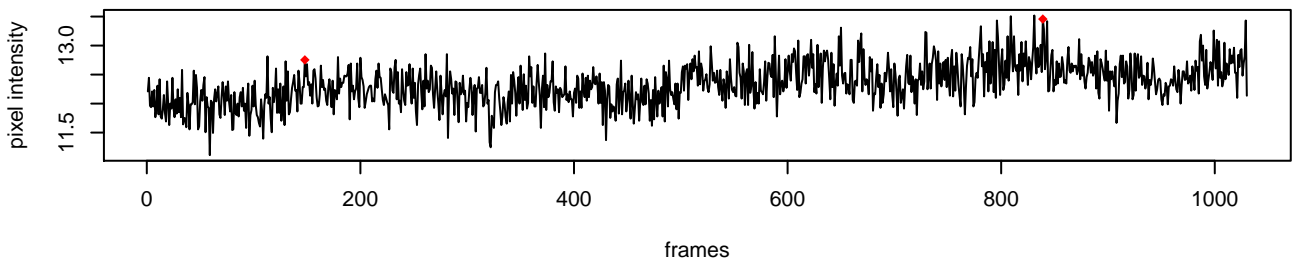

**Graph 19 , 24    Total Activity 4    Position in Array 415**

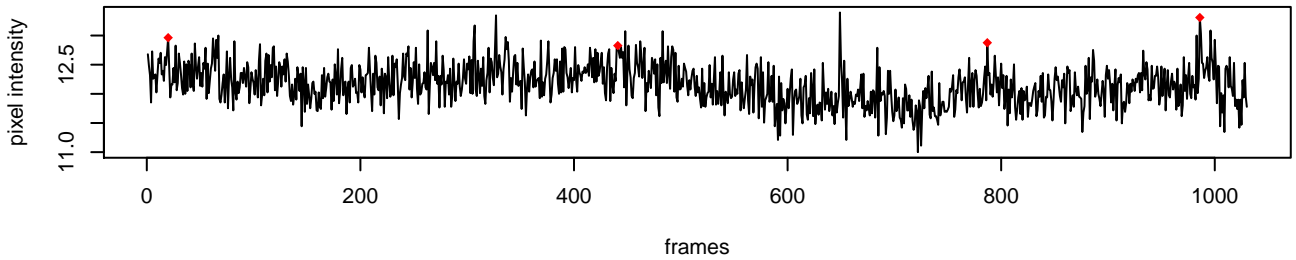

**Graph 25 , 24    Total Activity 3    Position in Array 421**

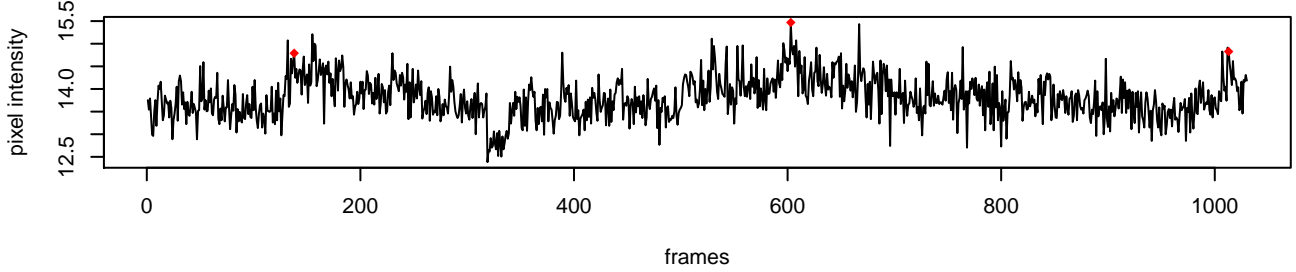

**Graph 27 , 24    Total Activity 2    Position in Array 423**

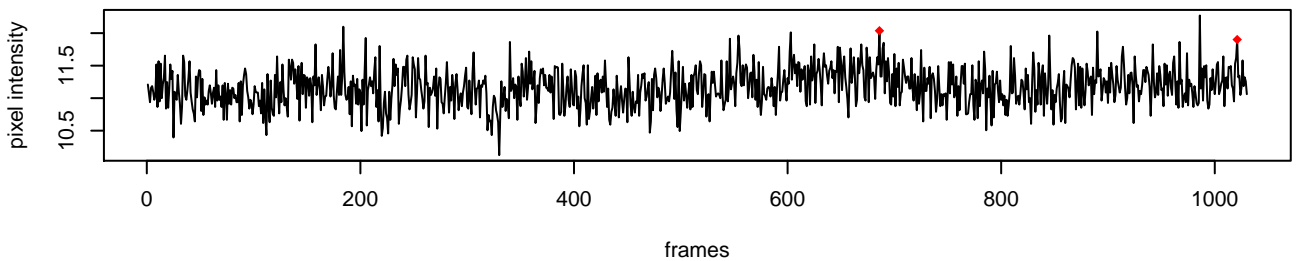

**Graph 28 , 24    Total Activity 2    Position in Array 424**

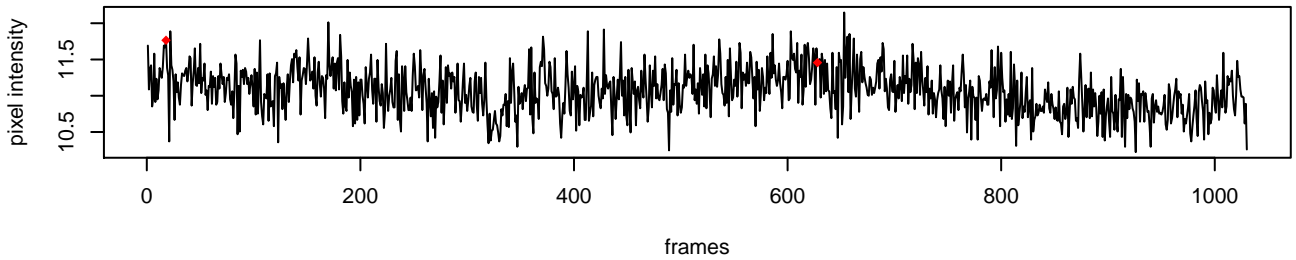

**Graph 30 , 24    Total Activity 3    Position in Array 426**

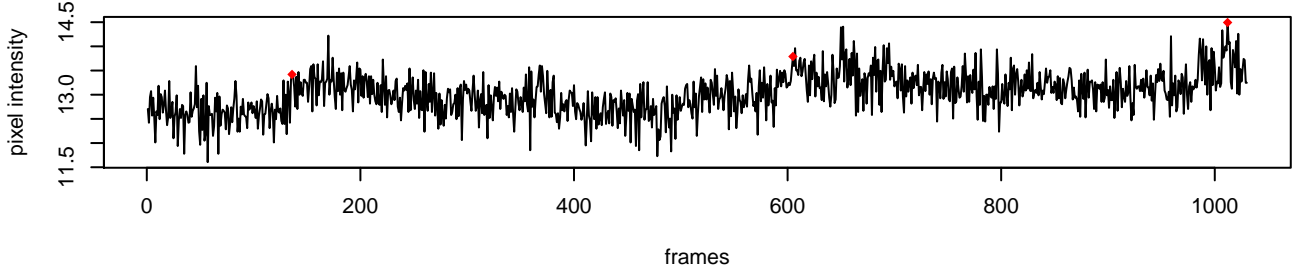

**Graph 31 , 24    Total Activity 2    Position in Array 427**

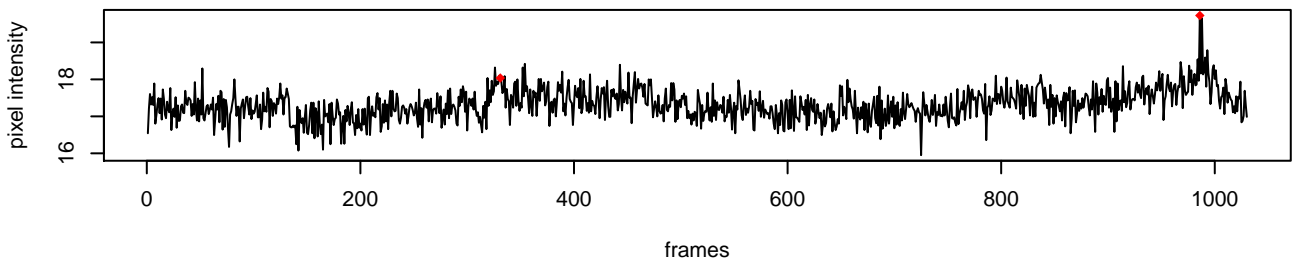

**Graph 32 , 24    Total Activity 2    Position in Array 428**

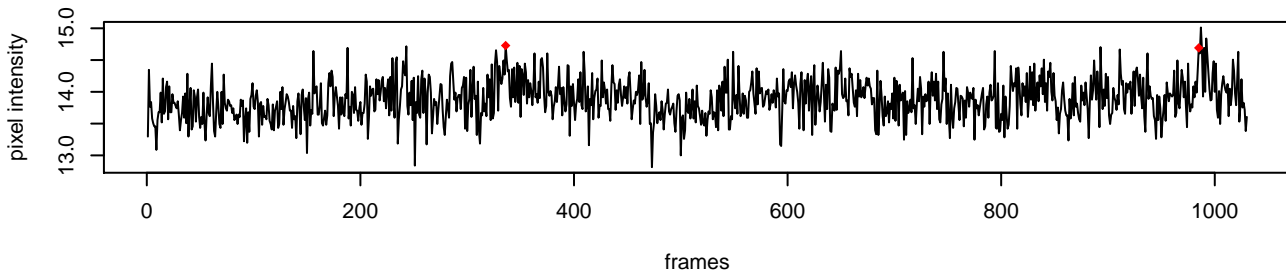

**Graph 33 , 24    Total Activity 4    Position in Array 429**

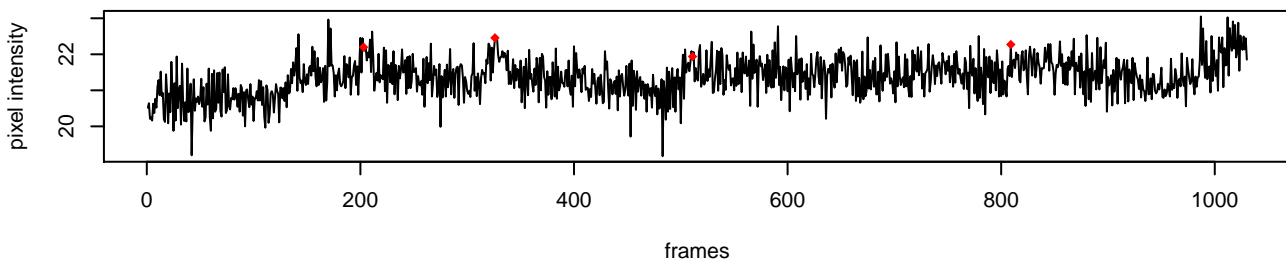

**Graph 34 , 24    Total Activity 4    Position in Array 430**

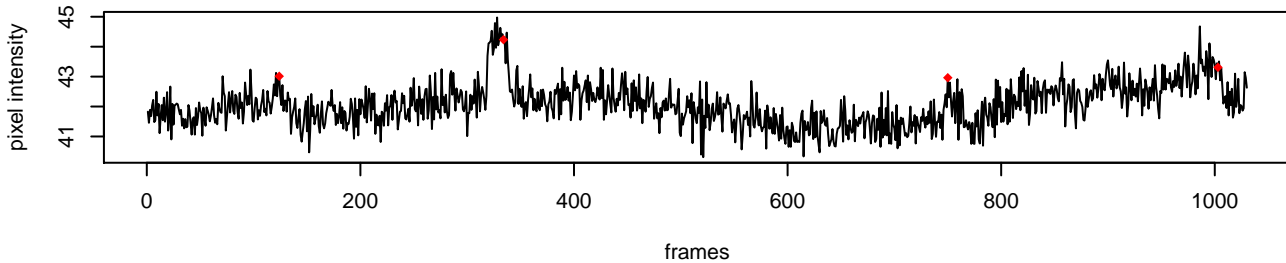

**Graph 35 , 24    Total Activity 4    Position in Array 431**

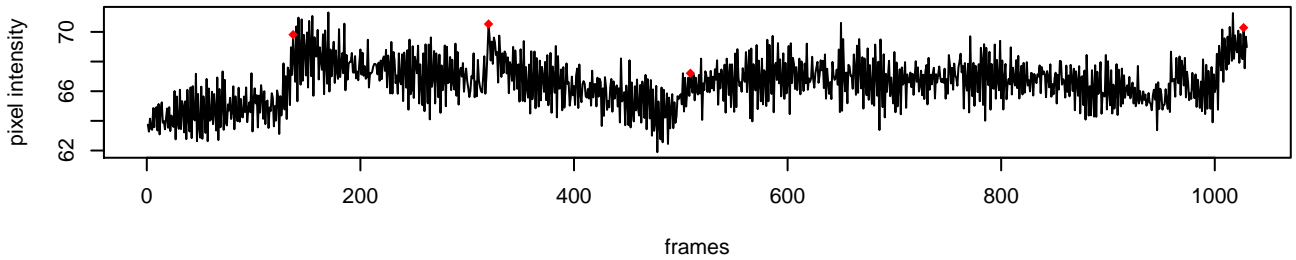

**Graph 36 , 24    Total Activity 5    Position in Array 432**

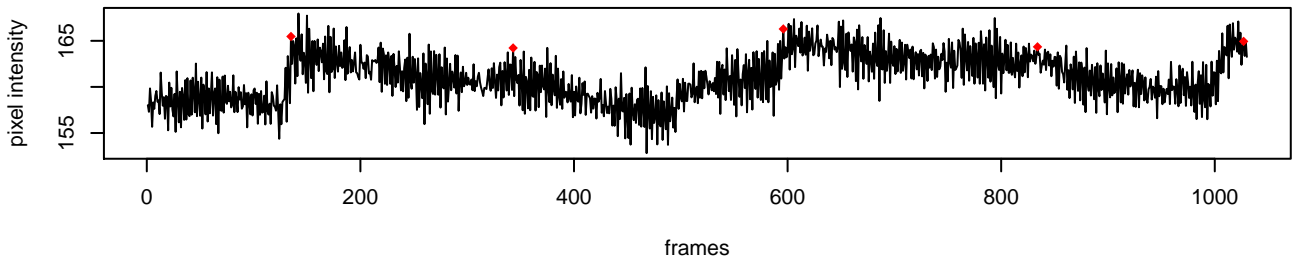

**Graph 37 , 24    Total Activity 3    Position in Array 433**

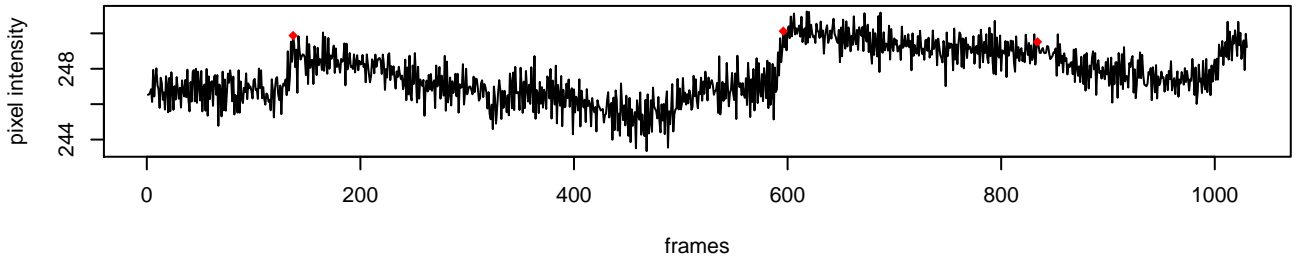

**Graph 38 , 24    Total Activity 5    Position in Array 434**

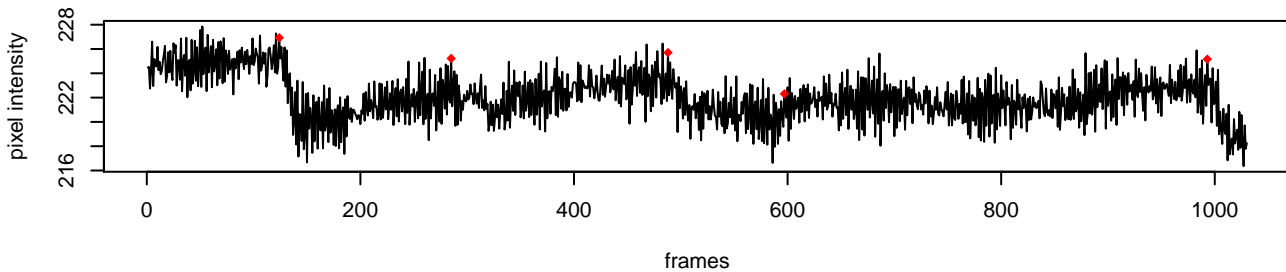

**Graph 39 , 24    Total Activity 4    Position in Array 435**

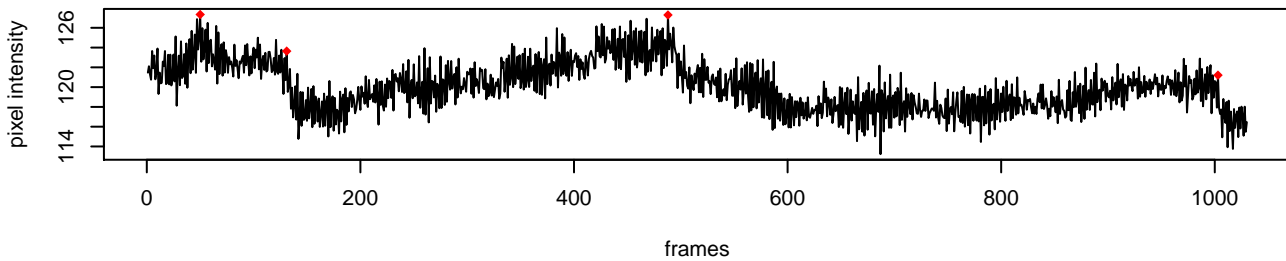

**Graph 40 , 24    Total Activity 6    Position in Array 436**

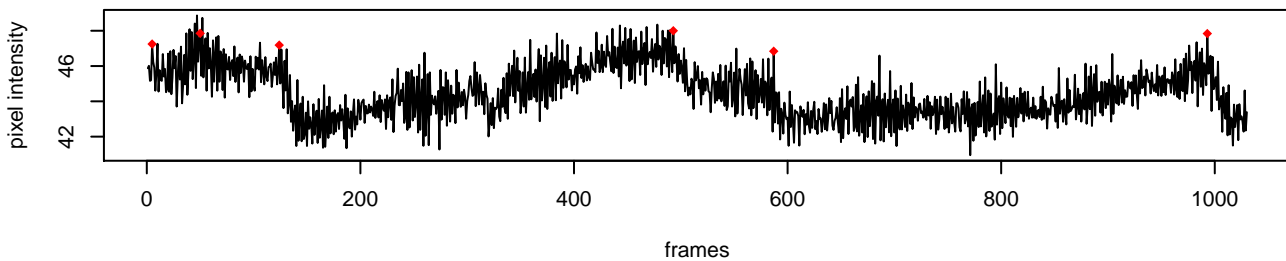



**Graph 41 , 24    Total Activity 4    Position in Array 437**

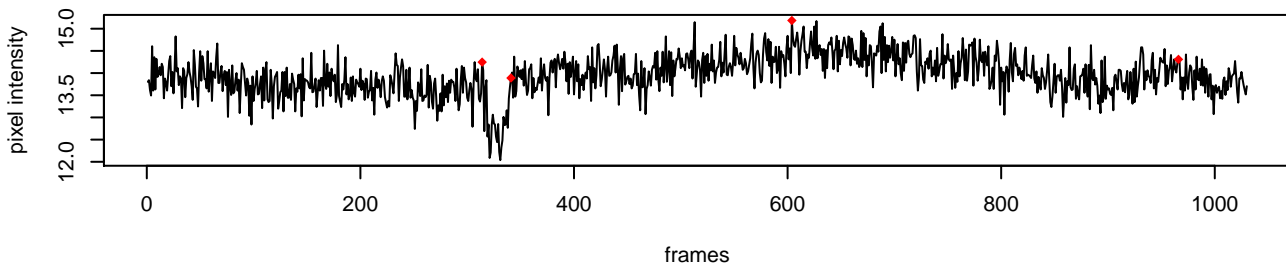

**Graph 42 , 24    Total Activity 7    Position in Array 438**

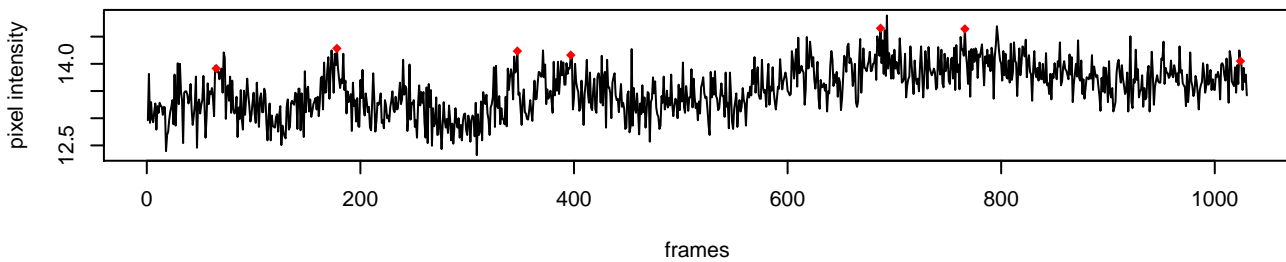

**Graph 1 , 23    Total Activity 3    Position in Array 441**

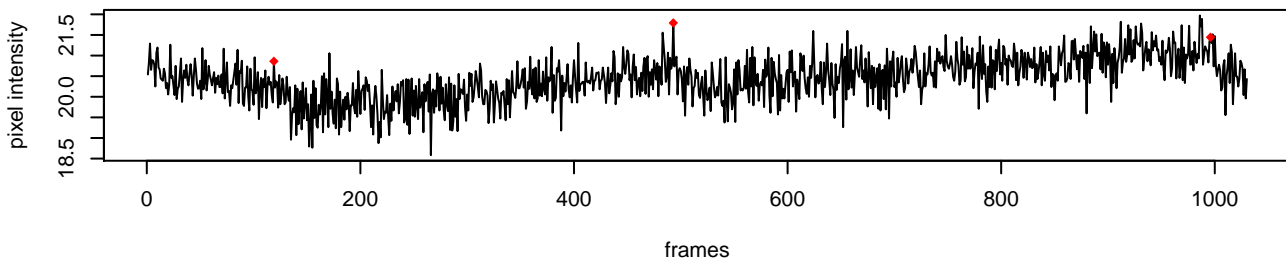

**Graph 2 , 23    Total Activity 3    Position in Array 442**

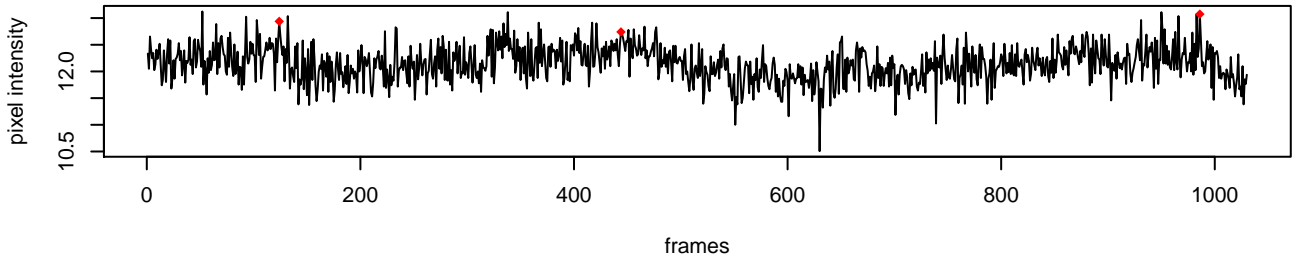

**Graph 4 , 23    Total Activity 3    Position in Array 444**

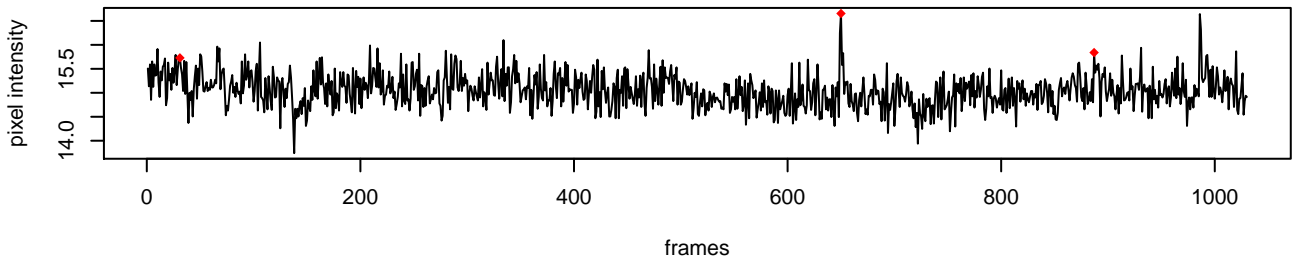

**Graph 17 , 23    Total Activity 3    Position in Array 457**

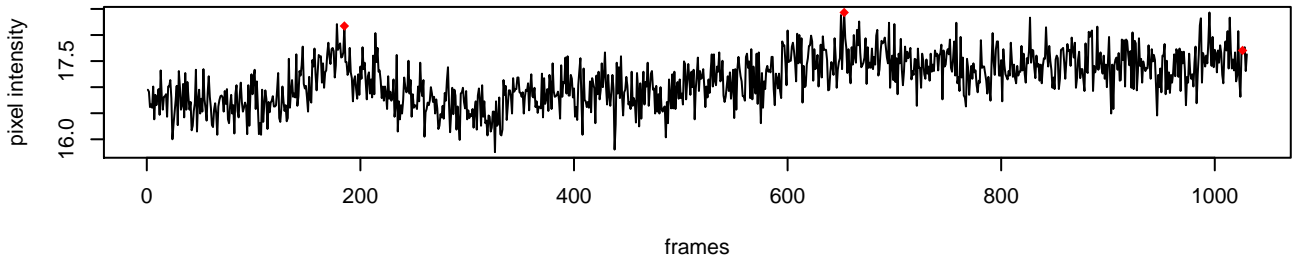

**Graph 18 , 23    Total Activity 4    Position in Array 458**

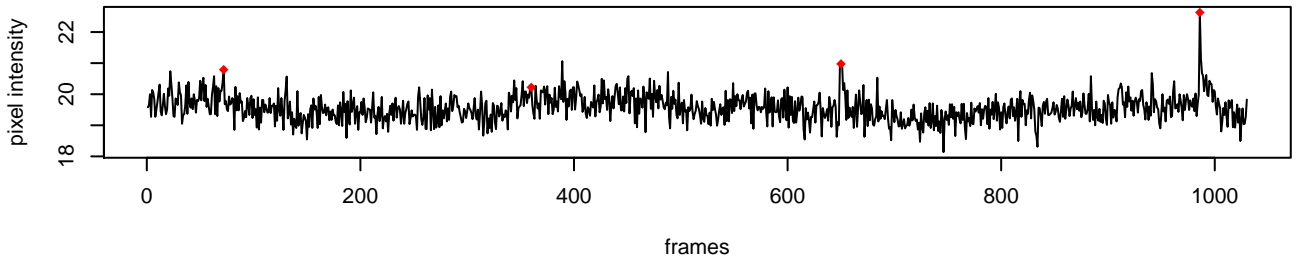

**Graph 20 , 23    Total Activity 4    Position in Array 460**

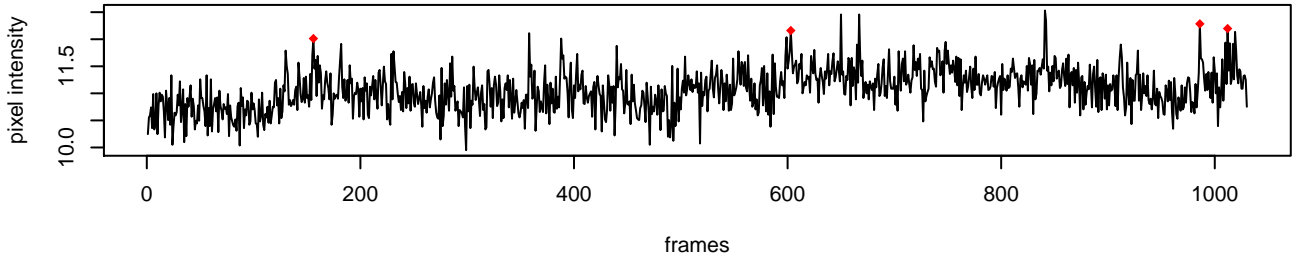

**Graph 21 , 23    Total Activity 2    Position in Array 461**

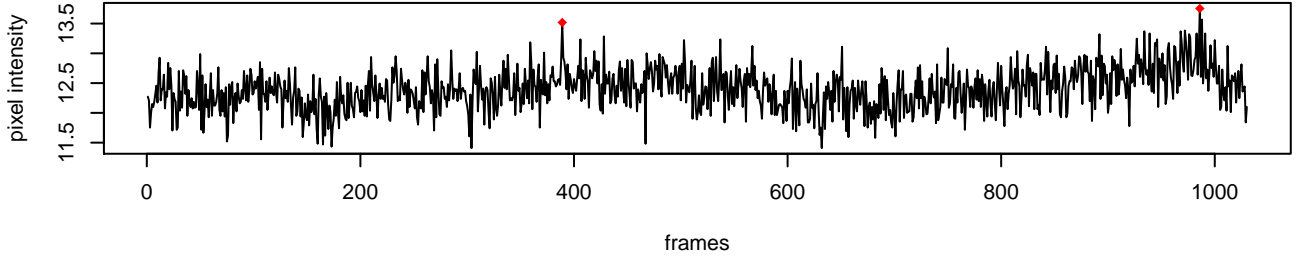

**Graph 22 , 23    Total Activity 13    Position in Array 462**

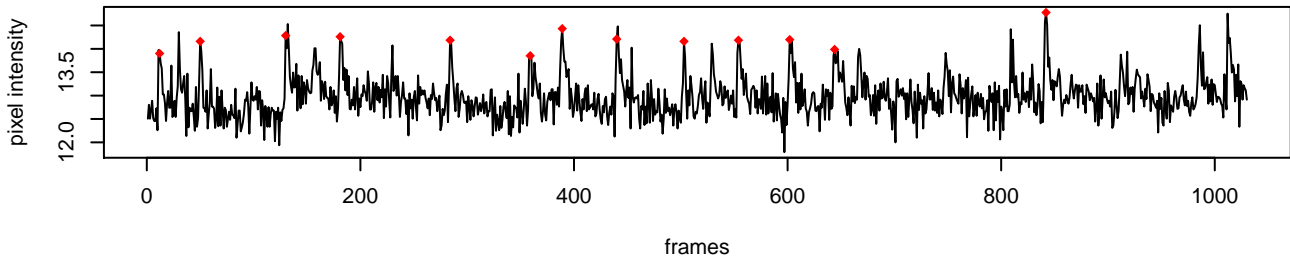

**Graph 23 , 23    Total Activity 2    Position in Array 463**

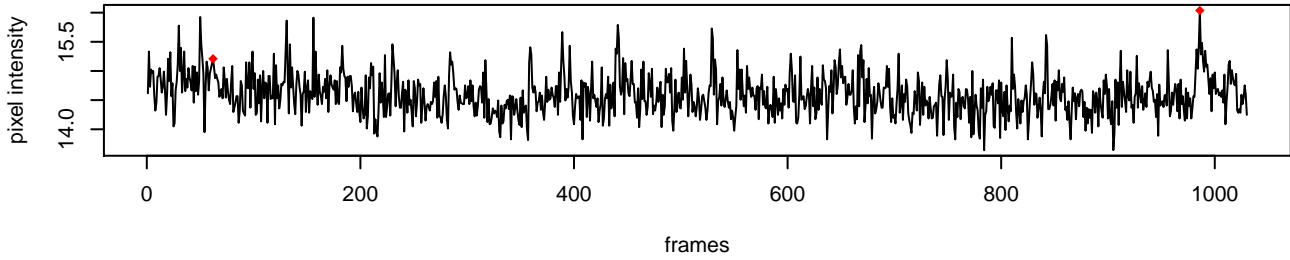

**Graph 25 , 23    Total Activity 22    Position in Array 465**

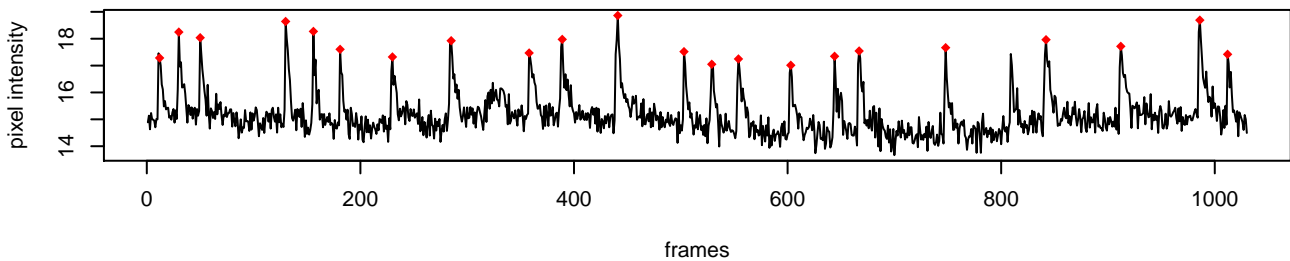

**Graph 28 , 23    Total Activity 3    Position in Array 468**

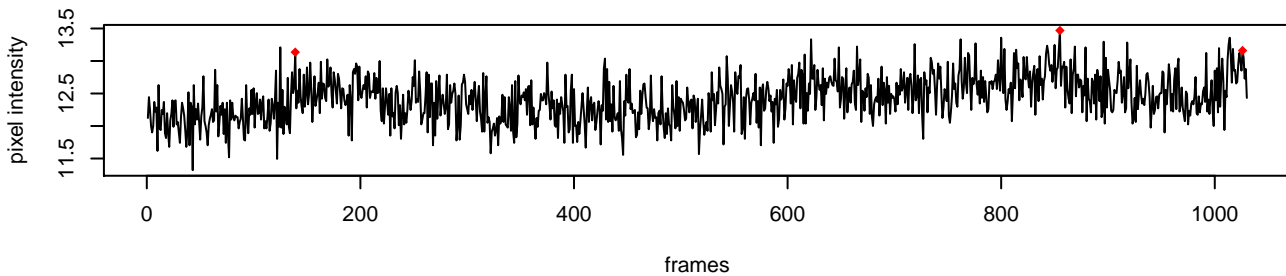

**Graph 34 , 23    Total Activity 15    Position in Array 474**

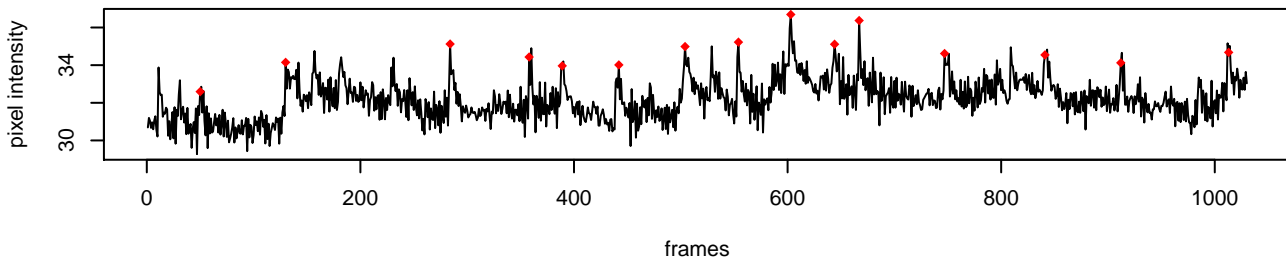

**Graph 35 , 23    Total Activity 6    Position in Array 475**

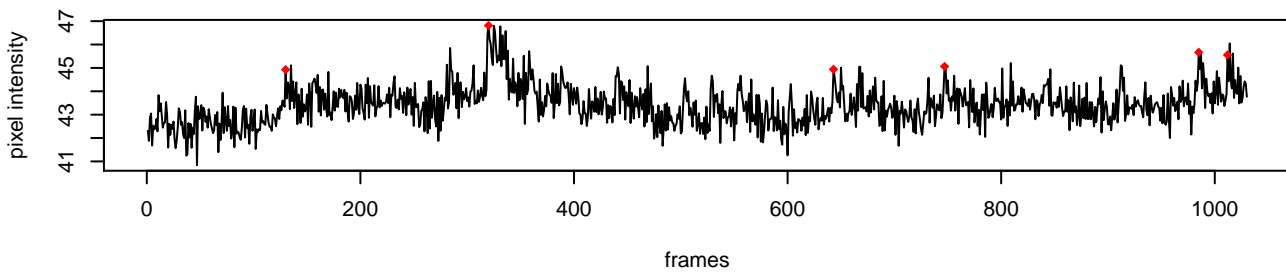

**Graph 36 , 23    Total Activity 3    Position in Array 476**

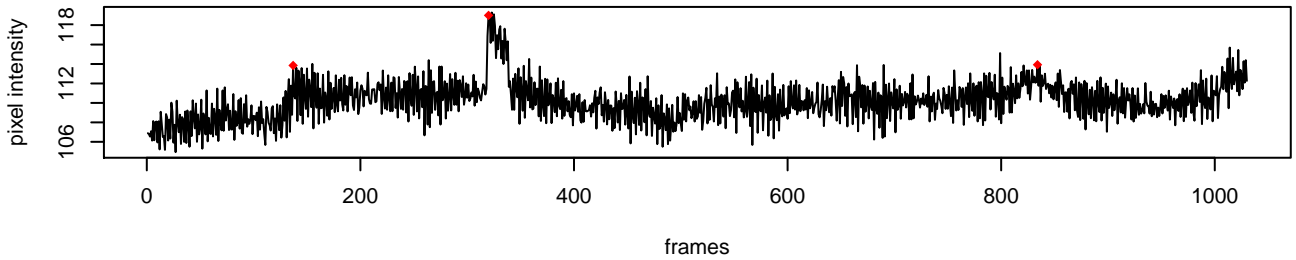

**Graph 37 , 23    Total Activity 5    Position in Array 477**

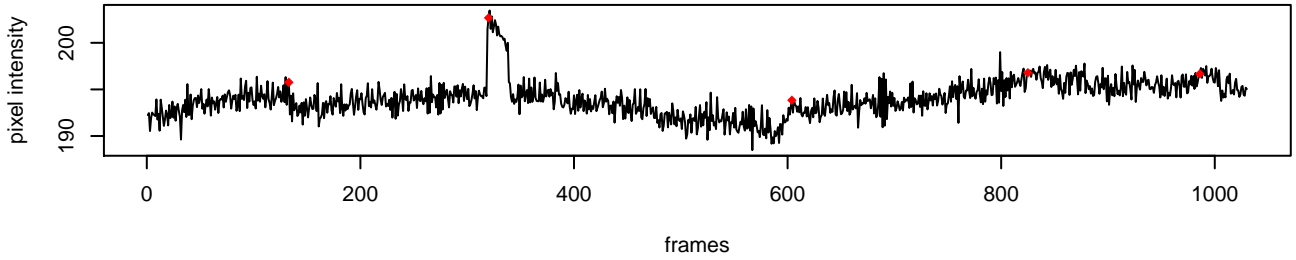

**Graph 38 , 23    Total Activity 5    Position in Array 478**

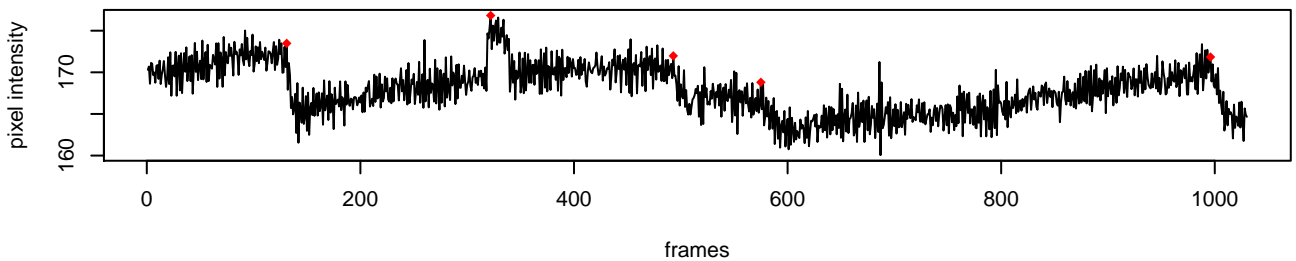

**Graph 39 , 23    Total Activity 5    Position in Array 479**

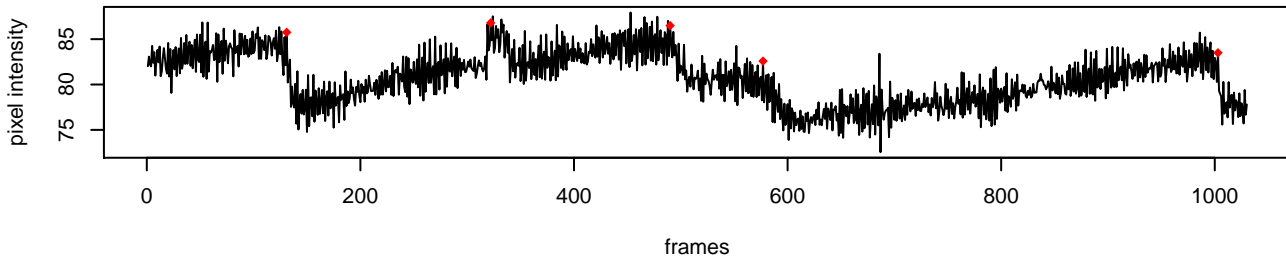

**Graph 40 , 23    Total Activity 18    Position in Array 480**

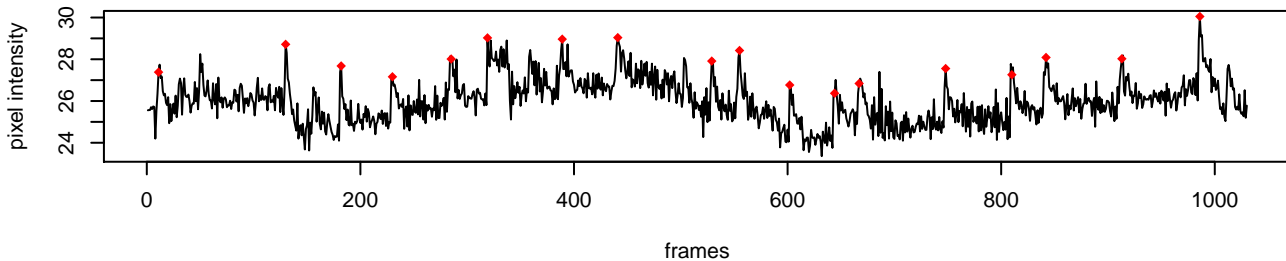

**Graph 41 , 23    Total Activity 20    Position in Array 481**

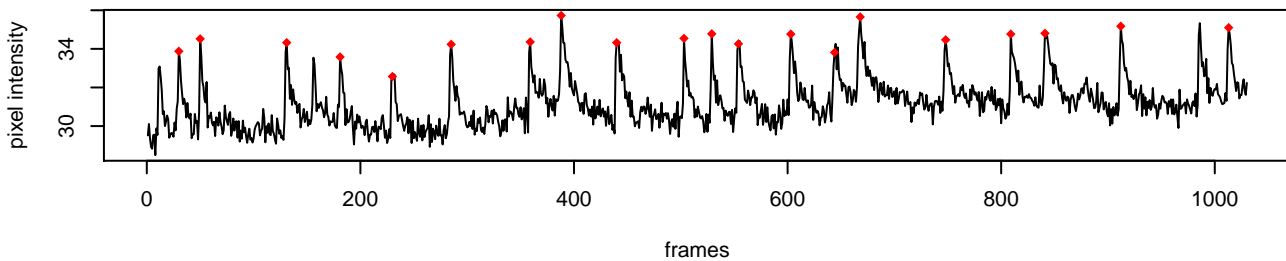

**Graph 42 , 23    Total Activity 2    Position in Array 482**

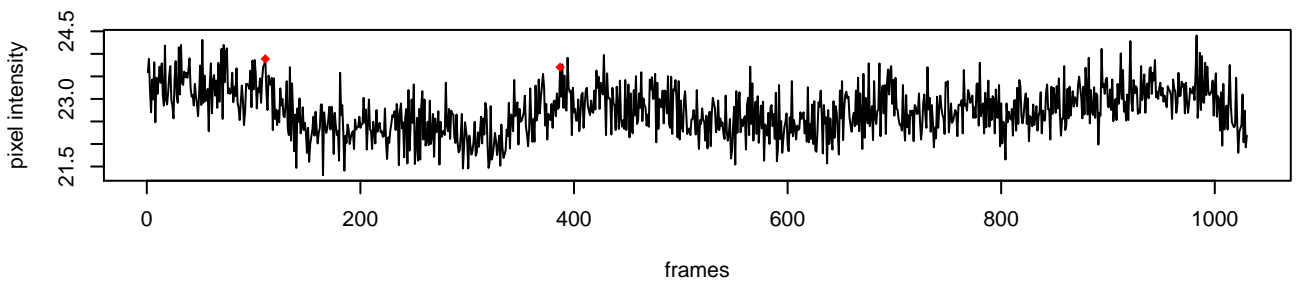

**Graph 43 , 23    Total Activity 4    Position in Array 483**

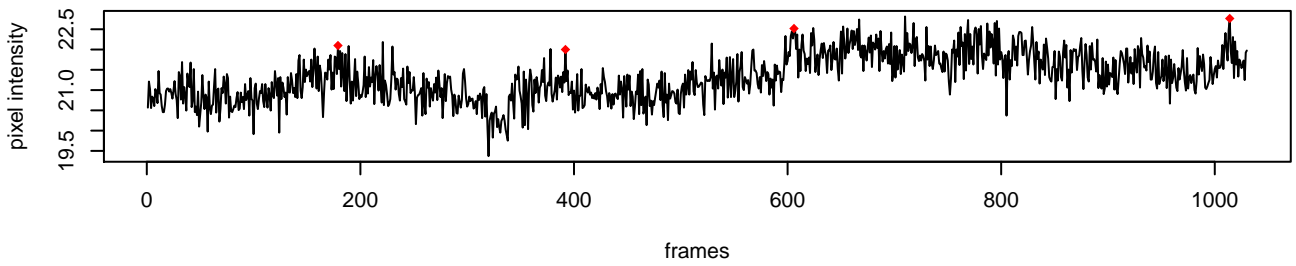

**Graph 1 , 22    Total Activity 3    Position in Array 485**

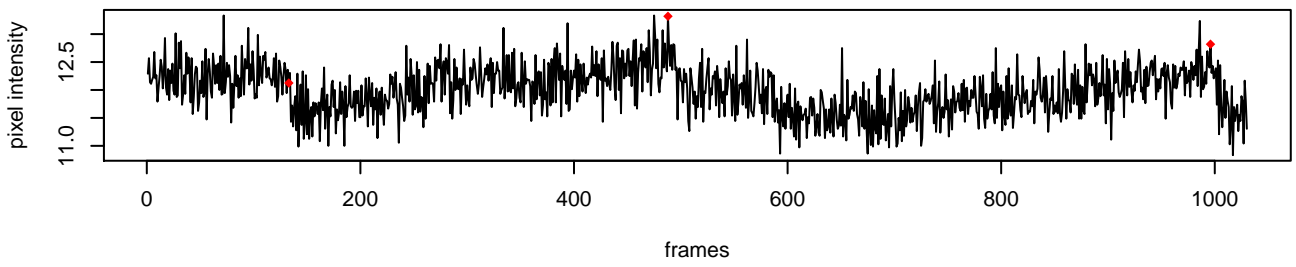



**Graph 17 , 22    Total Activity 2    Position in Array 501**

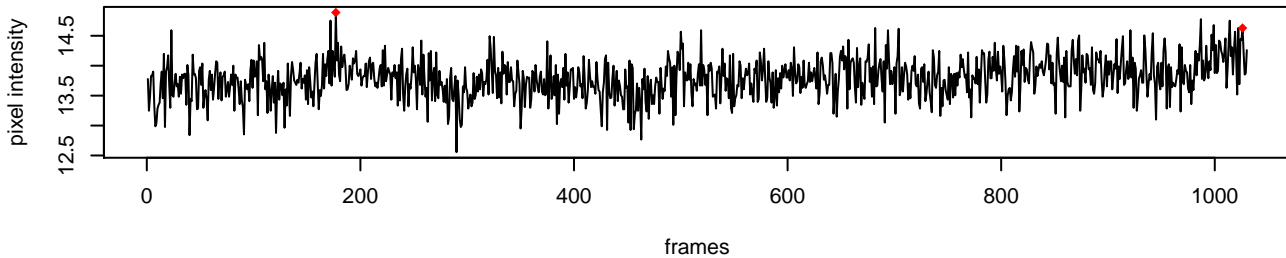

**Graph 18 , 22    Total Activity 3    Position in Array 502**

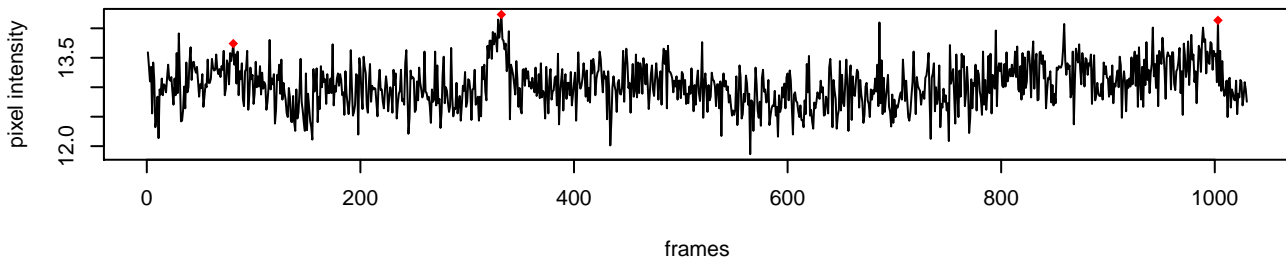

**Graph 33 , 22    Total Activity 22    Position in Array 517**

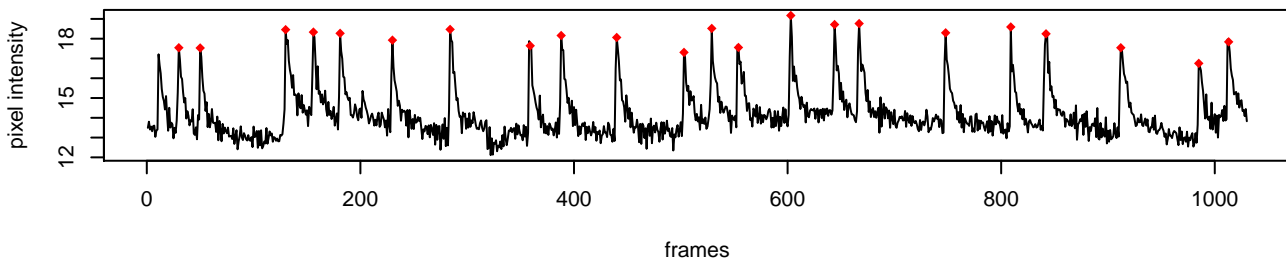

**Graph 34 , 22    Total Activity 20    Position in Array 518**

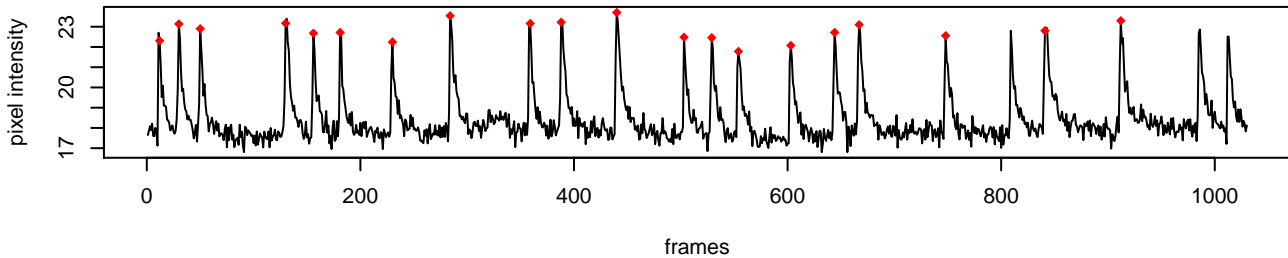

**Graph 35 , 22    Total Activity 3    Position in Array 519**

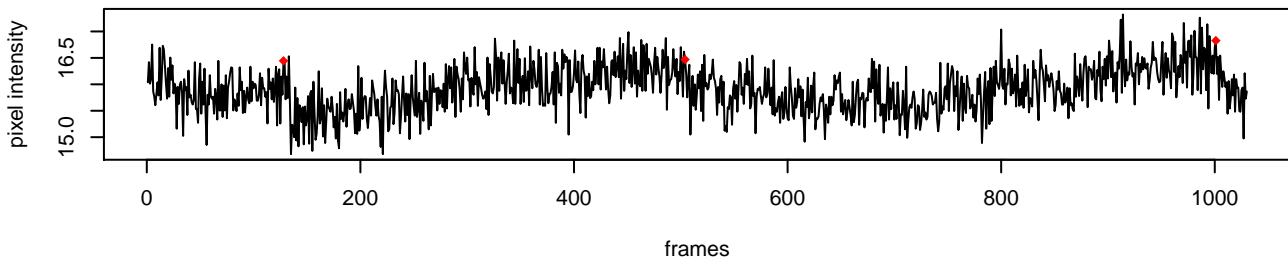

**Graph 36 , 22    Total Activity 3    Position in Array 520**

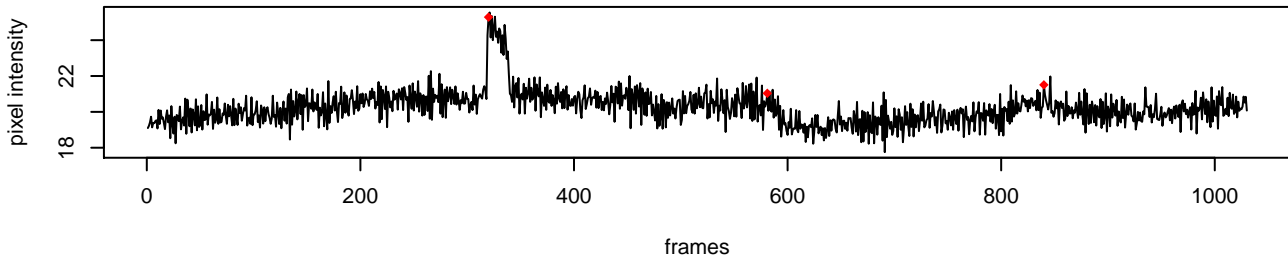

**Graph 37 , 22    Total Activity 4    Position in Array 521**

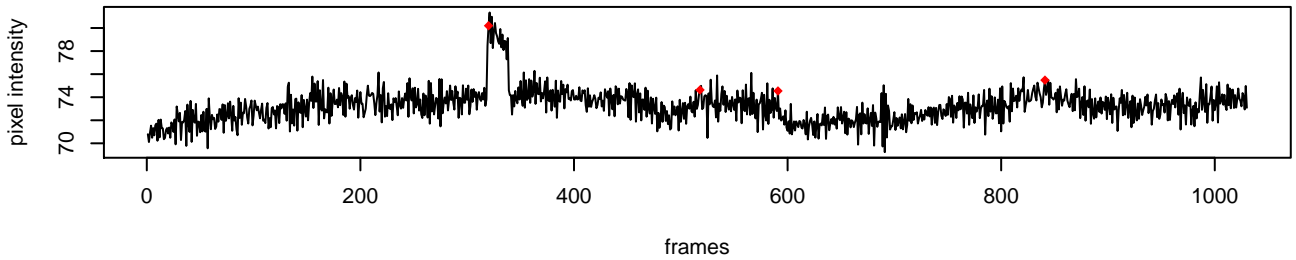

**Graph 38 , 22    Total Activity 3    Position in Array 522**

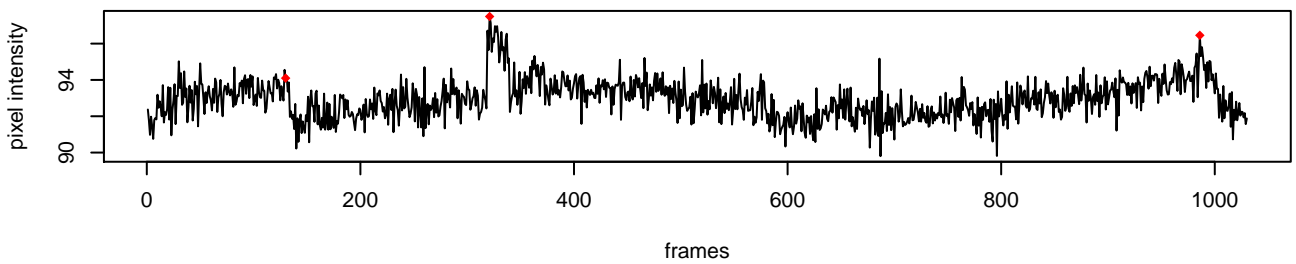

**Graph 39 , 22    Total Activity 4    Position in Array 523**

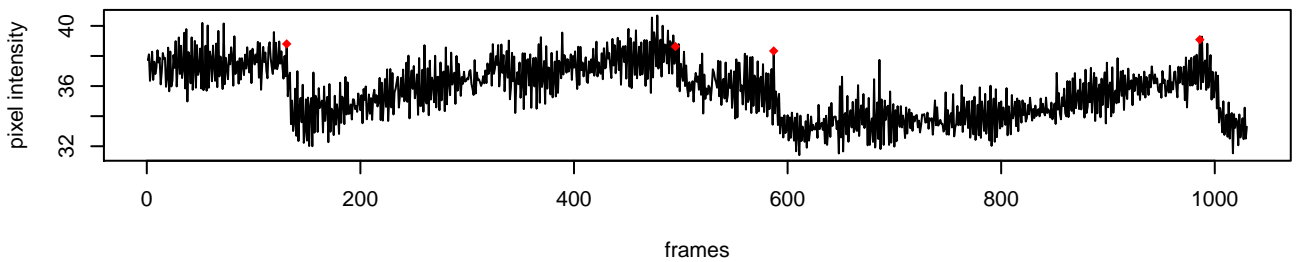

**Graph 40 , 22    Total Activity 2    Position in Array 524**

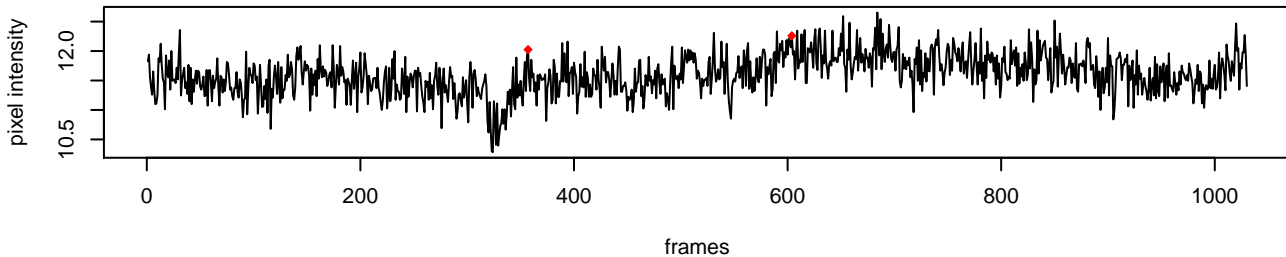

**Graph 41 , 22    Total Activity 3    Position in Array 525**

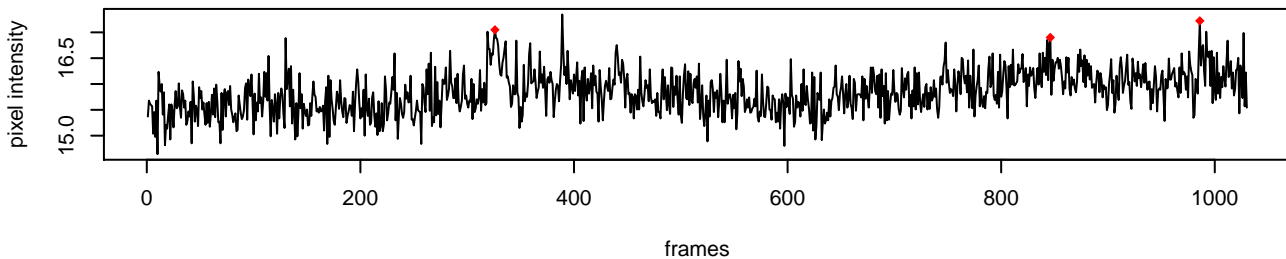

**Graph 42 , 22    Total Activity 4    Position in Array 526**

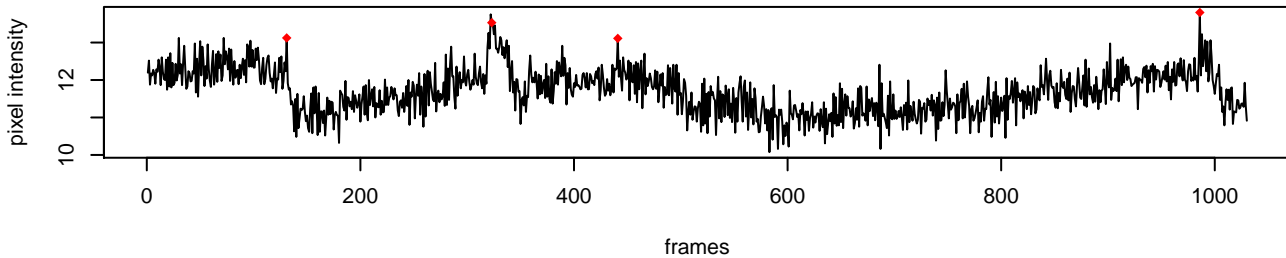

**Graph 4 , 21    Total Activity 4    Position in Array 532**

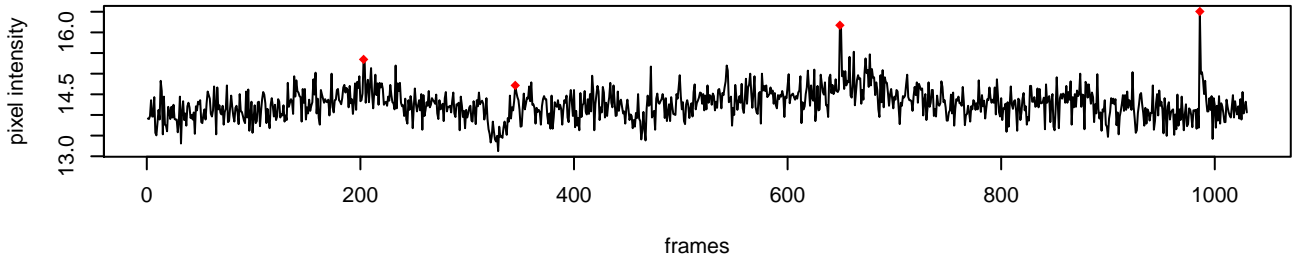

**Graph 19 , 21    Total Activity 3    Position in Array 547**

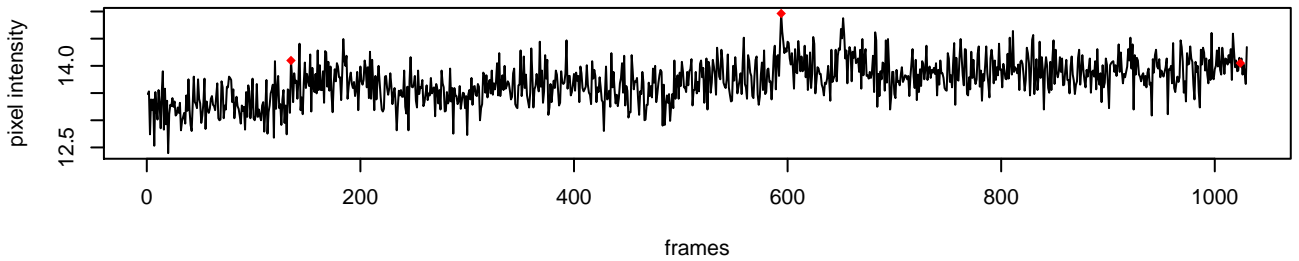

**Graph 22 , 21    Total Activity 3    Position in Array 550**

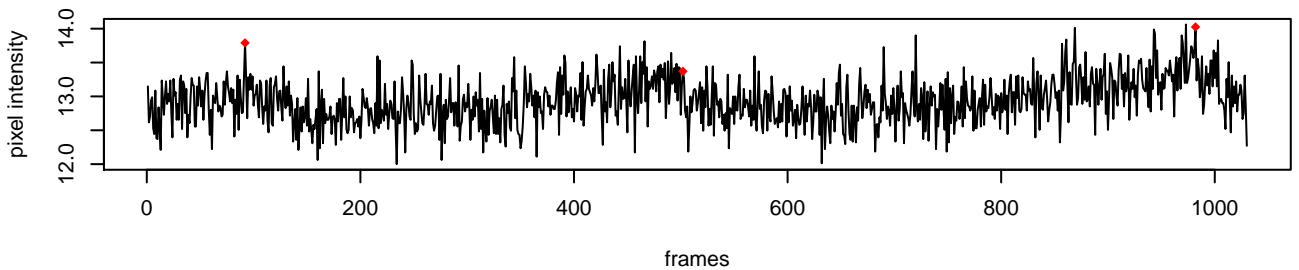

**Graph 24 , 21    Total Activity 2    Position in Array 552**

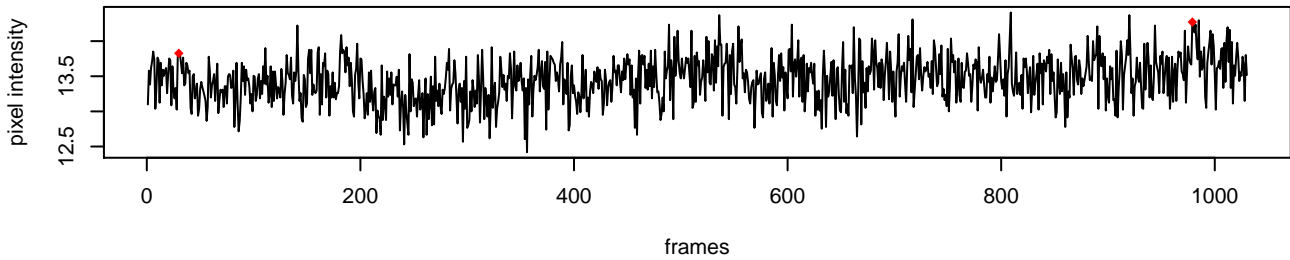

**Graph 26 , 21    Total Activity 22    Position in Array 554**

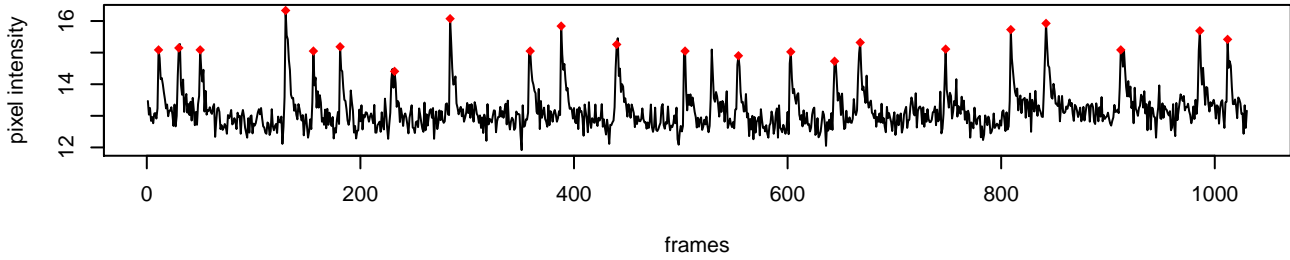

**Graph 32 , 21    Total Activity 22    Position in Array 560**

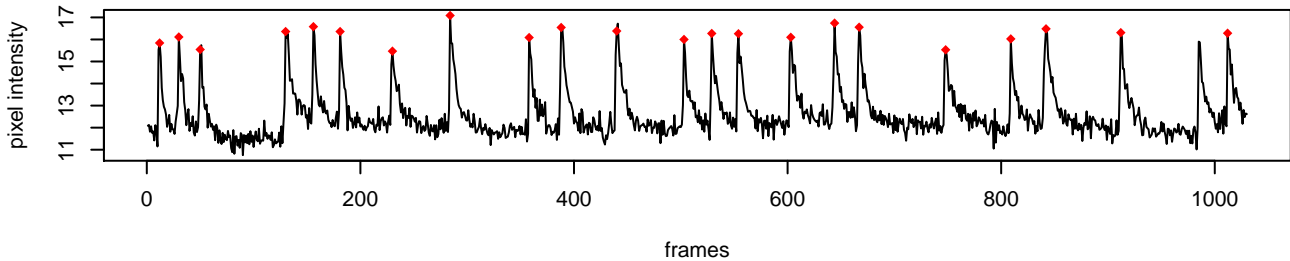

**Graph 33 , 21    Total Activity 13    Position in Array 561**

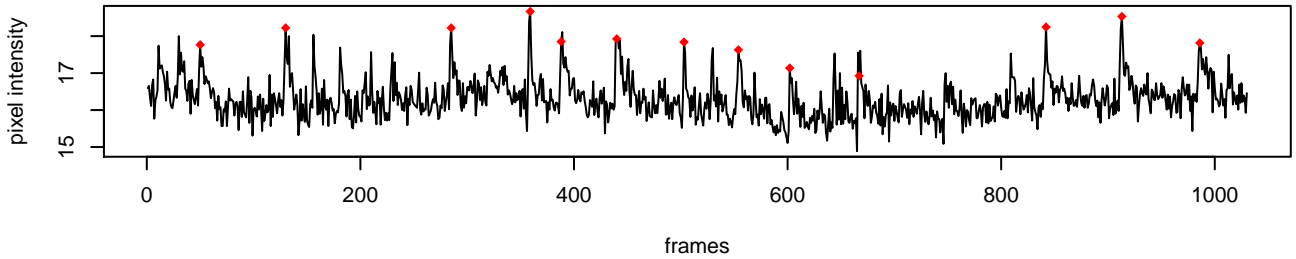

**Graph 35 , 21    Total Activity 4    Position in Array 563**

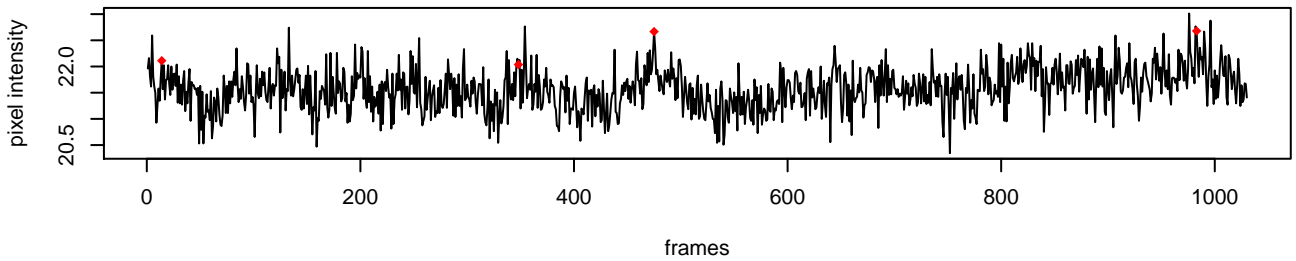

**Graph 36 , 21    Total Activity 4    Position in Array 564**

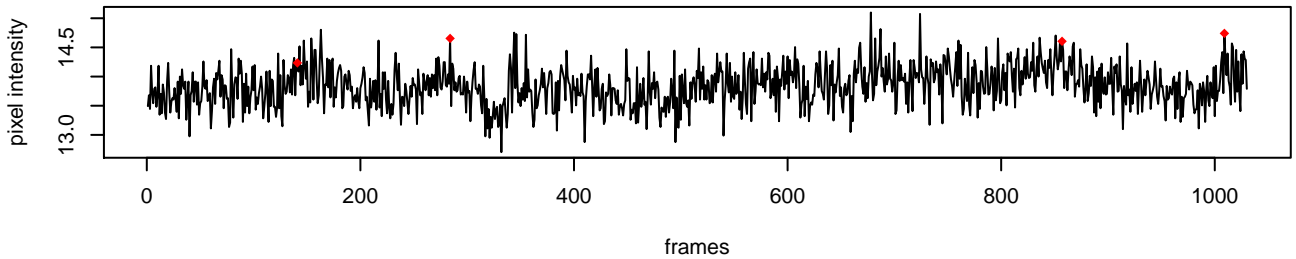

**Graph 37 , 21    Total Activity 4    Position in Array 565**

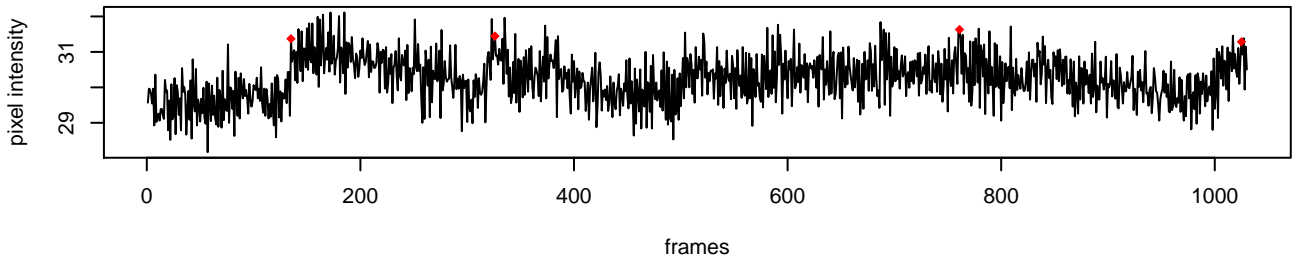

**Graph 38 , 21    Total Activity 5    Position in Array 566**

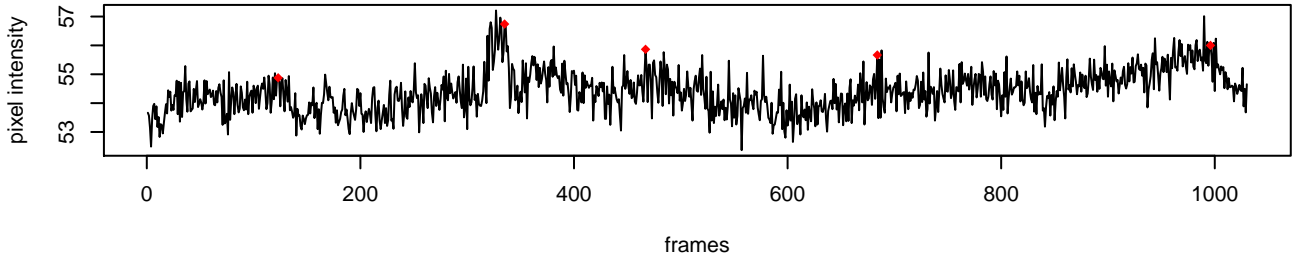

**Graph 39 , 21    Total Activity 5    Position in Array 567**

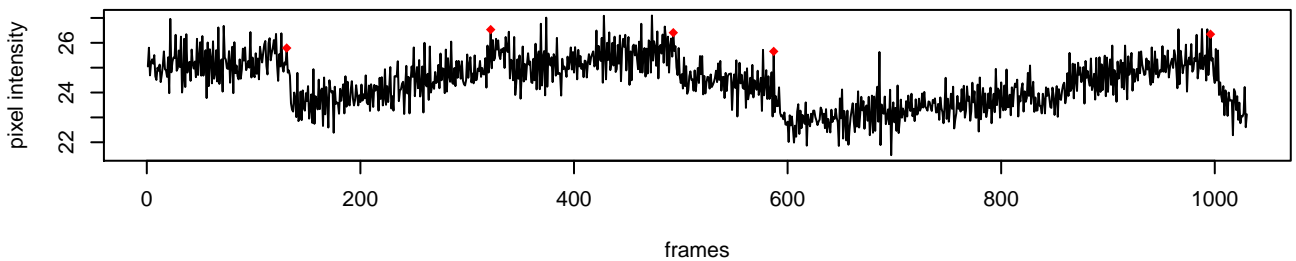



**Graph 40 , 21    Total Activity 2    Position in Array 568**

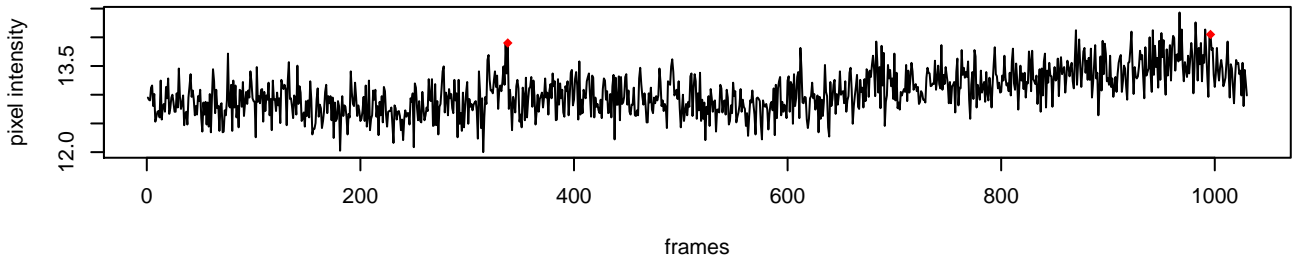

**Graph 4 , 20    Total Activity 6    Position in Array 576**

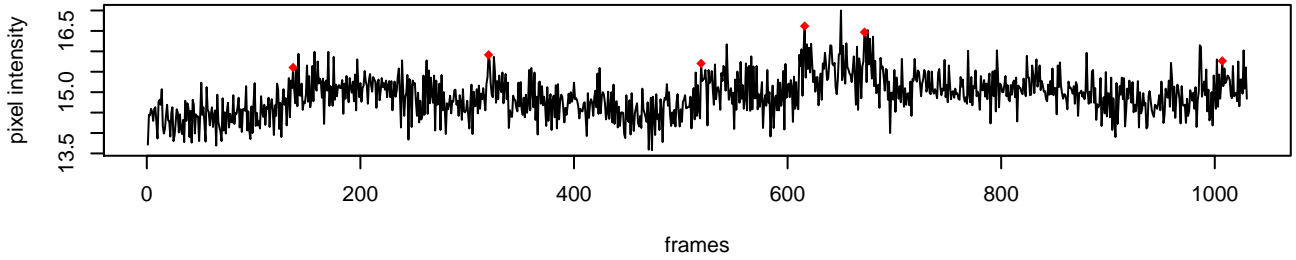

**Graph 5 , 20    Total Activity 5    Position in Array 577**

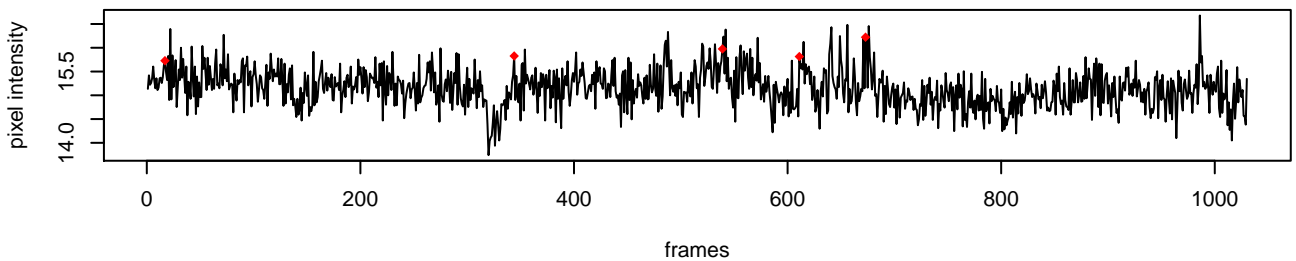

**Graph 16 , 20    Total Activity 3    Position in Array 588**

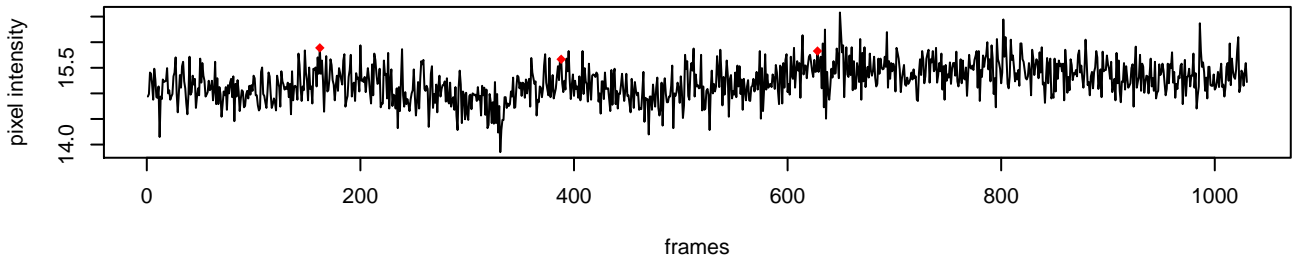

**Graph 21 , 20    Total Activity 3    Position in Array 593**

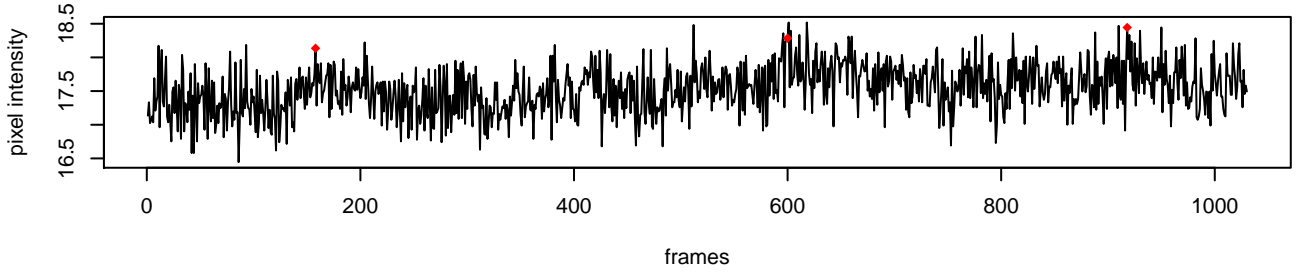

**Graph 22 , 20    Total Activity 3    Position in Array 594**

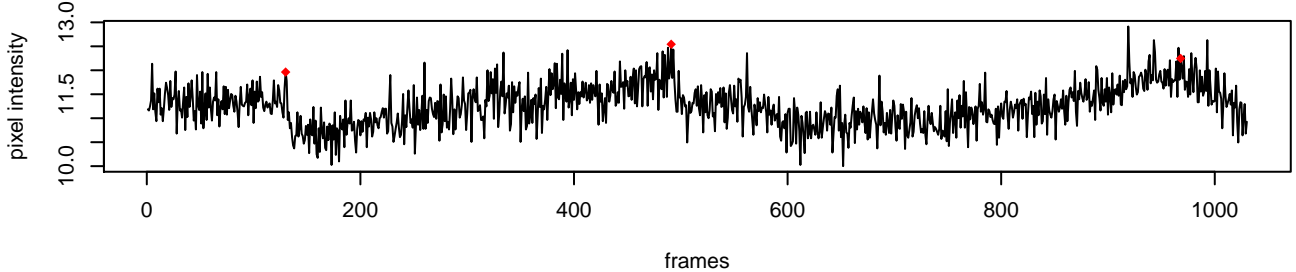

**Graph 23 , 20    Total Activity 4    Position in Array 595**

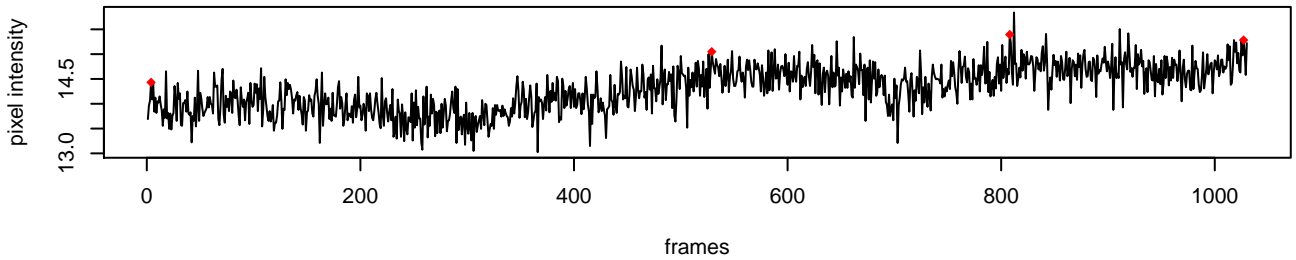

**Graph 35 , 20    Total Activity 2    Position in Array 607**

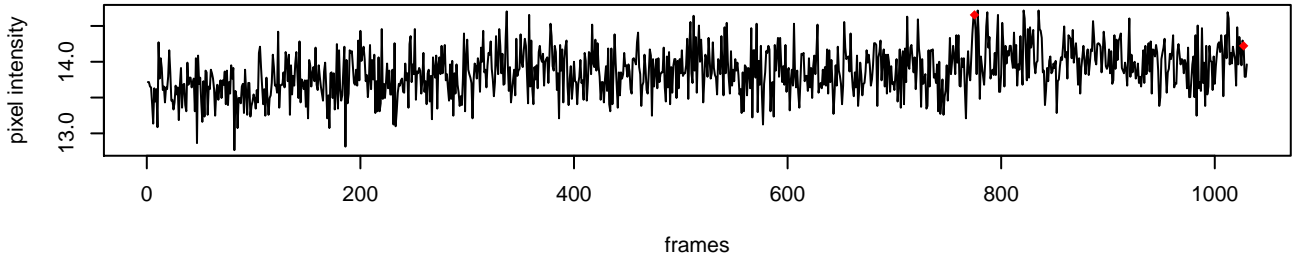

**Graph 36 , 20    Total Activity 2    Position in Array 608**

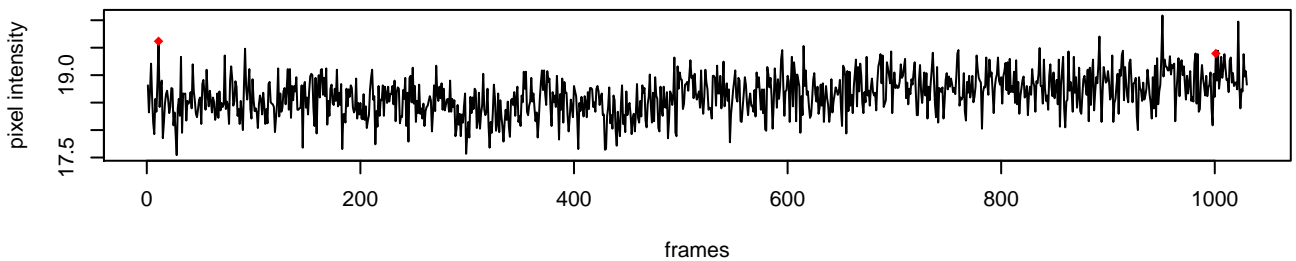

**Graph 37 , 20    Total Activity 4    Position in Array 609**

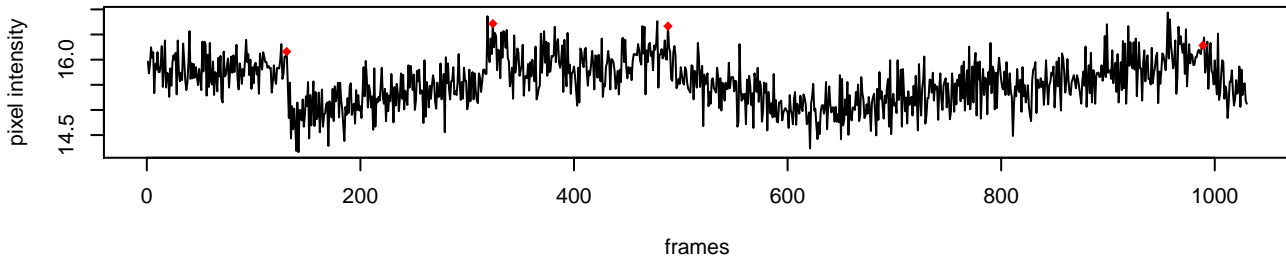

**Graph 38 , 20    Total Activity 4    Position in Array 610**

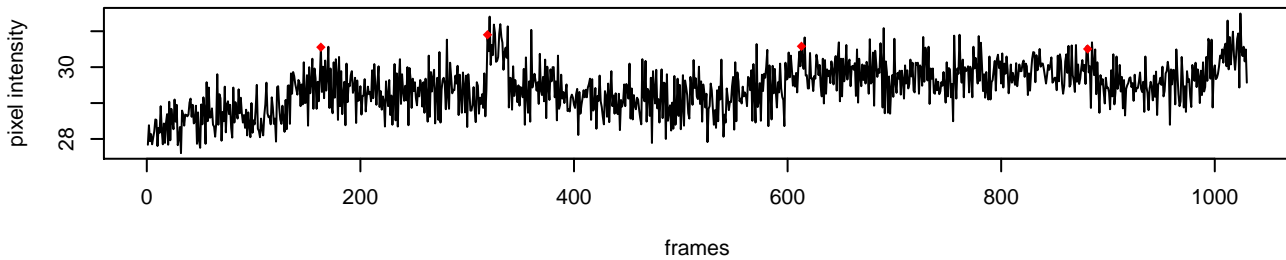

**Graph 39 , 20    Total Activity 2    Position in Array 611**

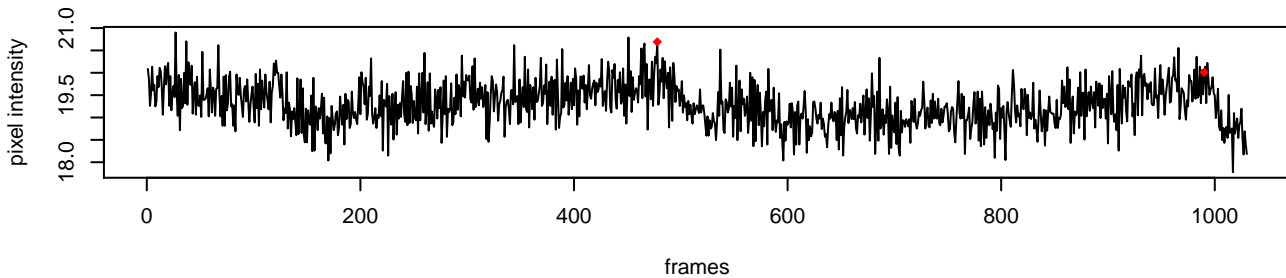

**Graph 40 , 20    Total Activity 3    Position in Array 612**

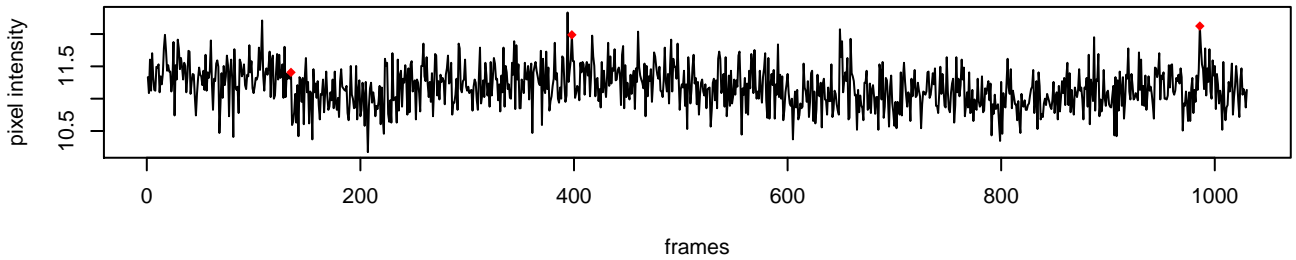

**Graph 1 , 19    Total Activity 5    Position in Array 617**

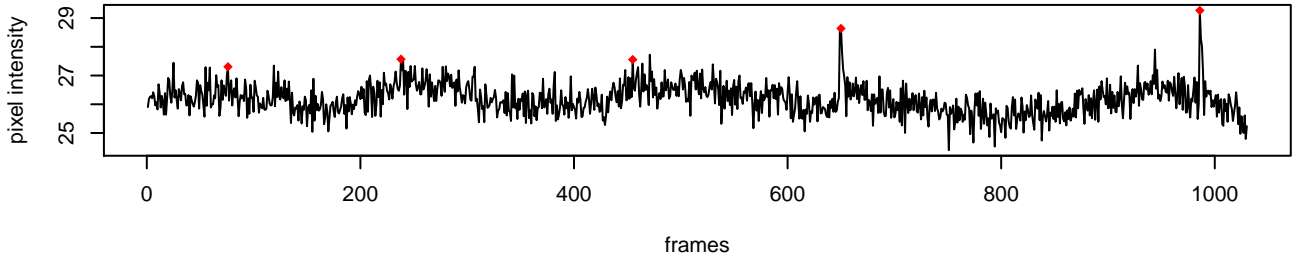

**Graph 2 , 19    Total Activity 3    Position in Array 618**

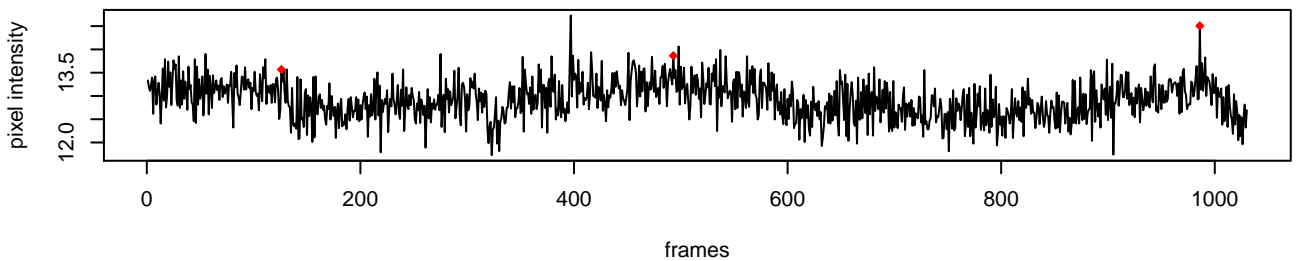

**Graph 5 , 19    Total Activity 2    Position in Array 621**

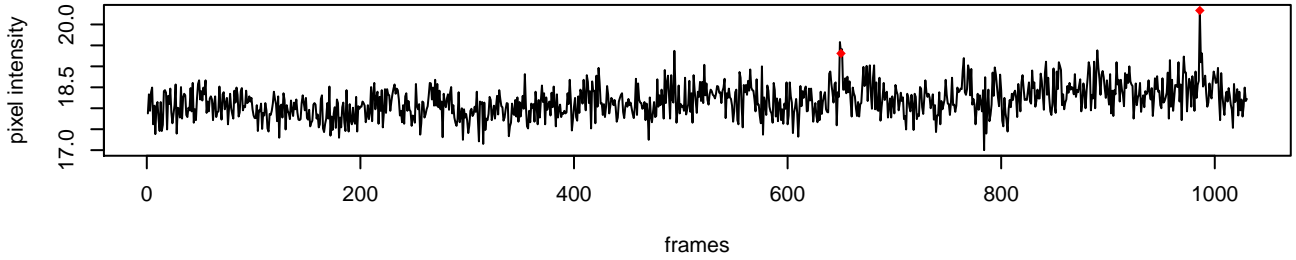

**Graph 15 , 19    Total Activity 4    Position in Array 631**

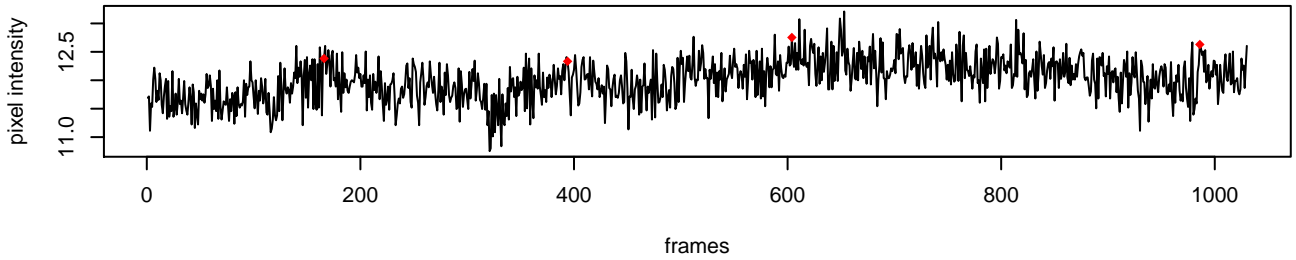

**Graph 16 , 19    Total Activity 2    Position in Array 632**

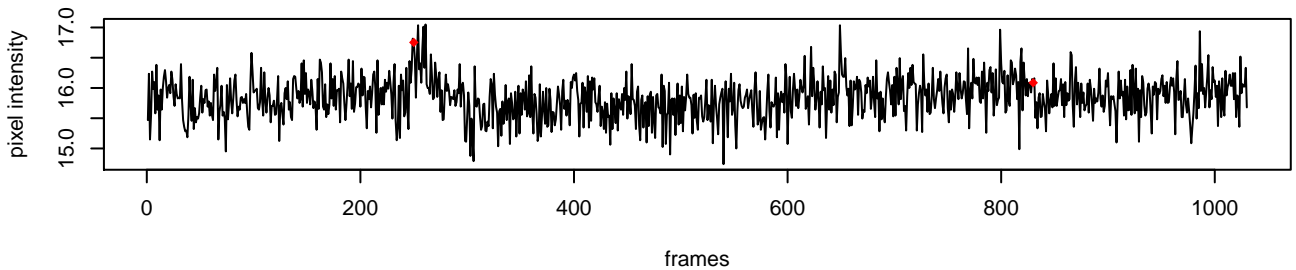

**Graph 21 , 19    Total Activity 4    Position in Array 637**

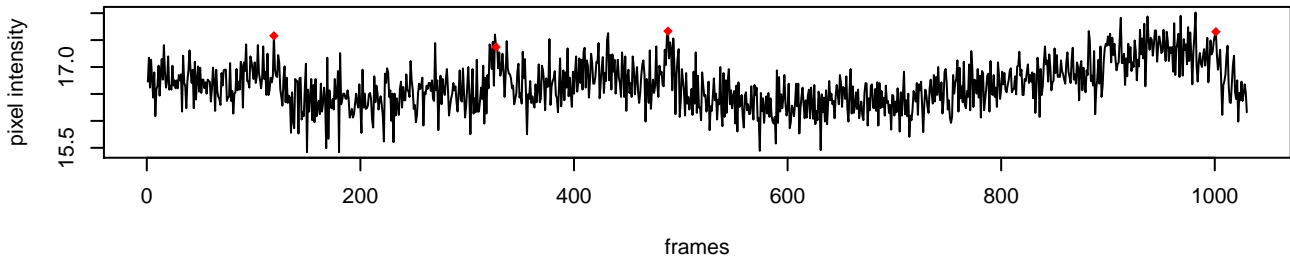

**Graph 23 , 19    Total Activity 3    Position in Array 639**

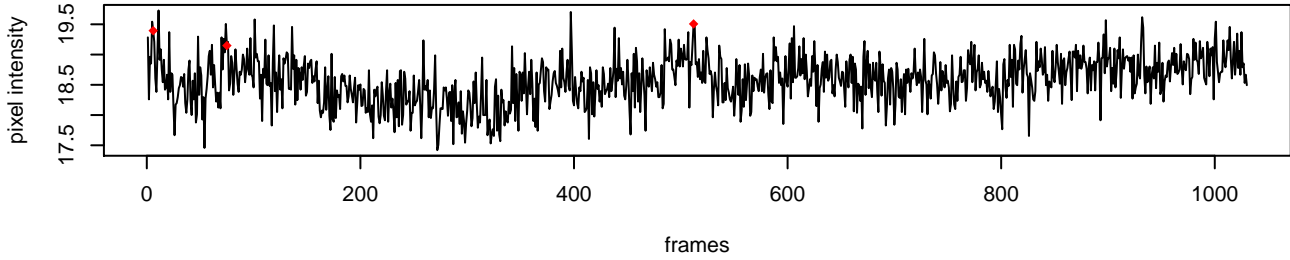

**Graph 29 , 19    Total Activity 2    Position in Array 645**

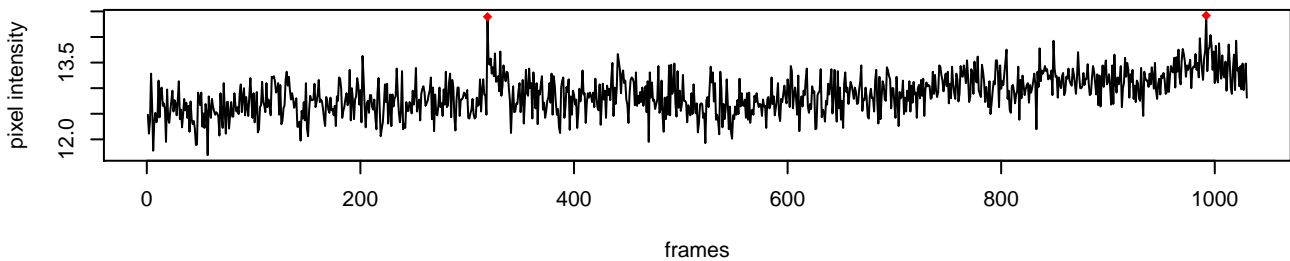

**Graph 34 , 19    Total Activity 4    Position in Array 650**

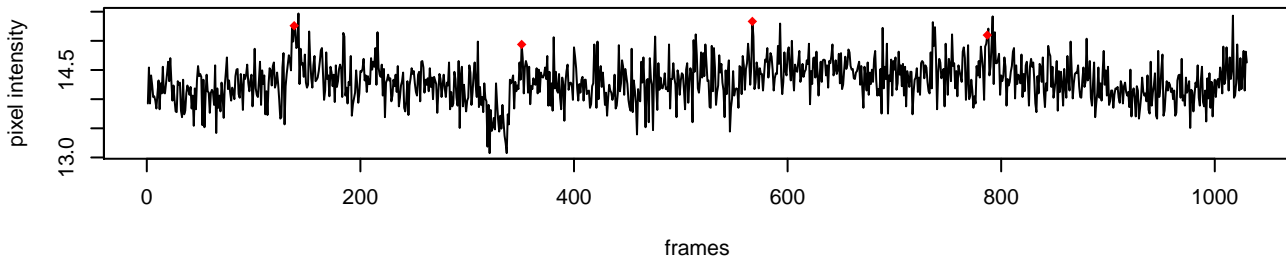

**Graph 35 , 19    Total Activity 4    Position in Array 651**

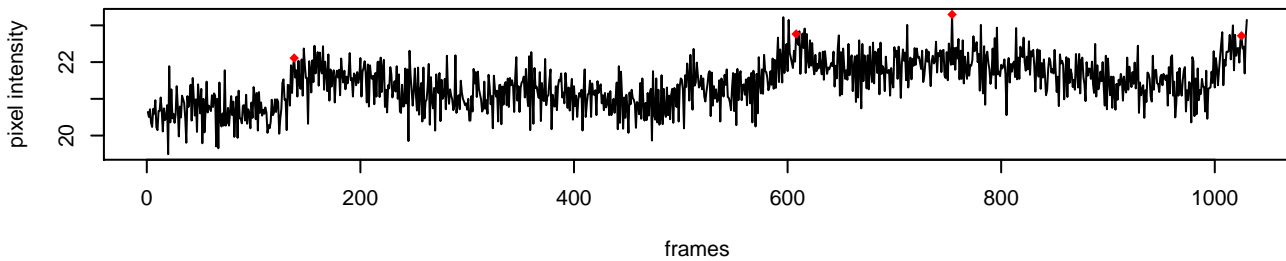

**Graph 36 , 19    Total Activity 3    Position in Array 652**

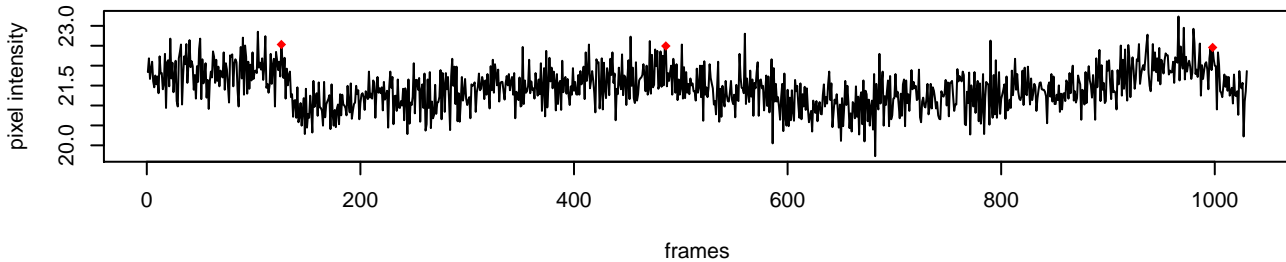



**Graph 37 , 19    Total Activity 2    Position in Array 653**

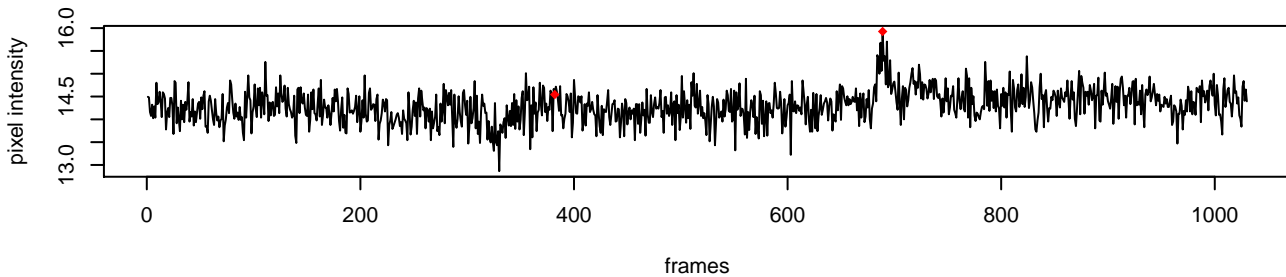

**Graph 38 , 19    Total Activity 4    Position in Array 654**

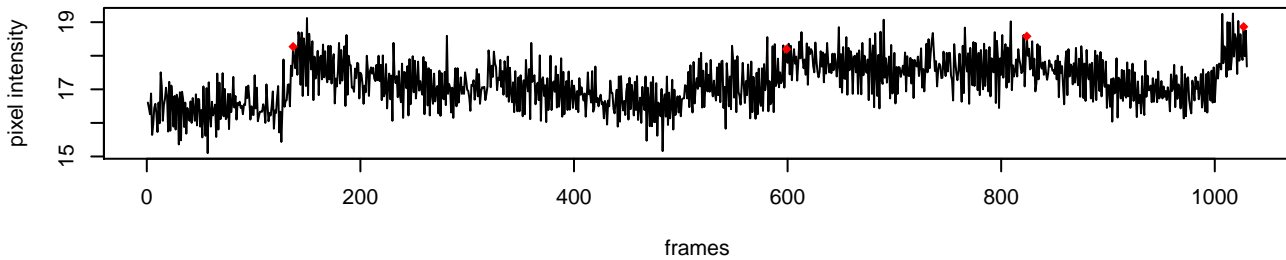

**Graph 39 , 19    Total Activity 4    Position in Array 655**

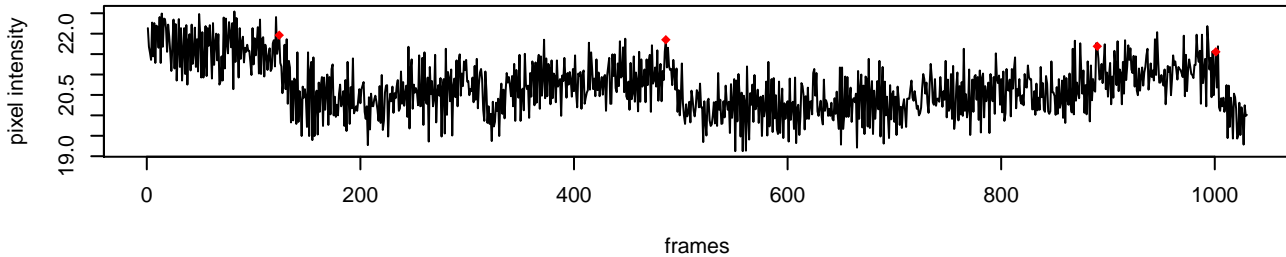

**Graph 2 , 18    Total Activity 5    Position in Array 662**

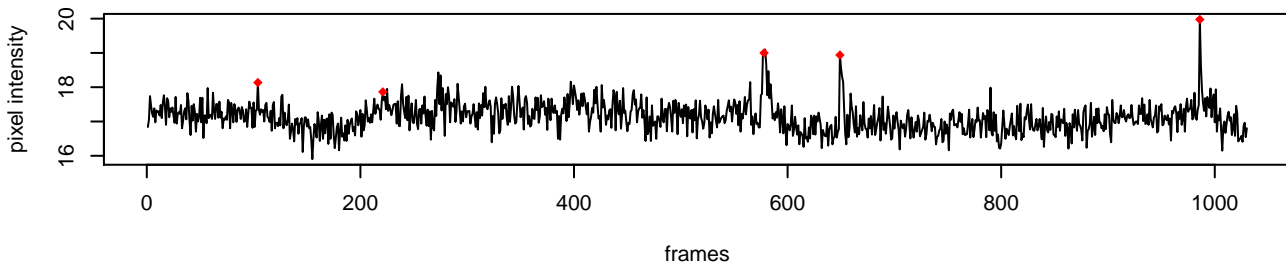

**Graph 6 , 18    Total Activity 2    Position in Array 666**

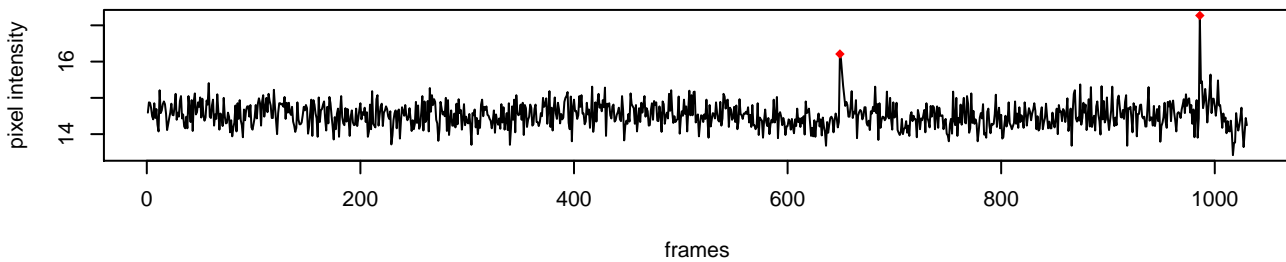

**Graph 13 , 18    Total Activity 16    Position in Array 673**

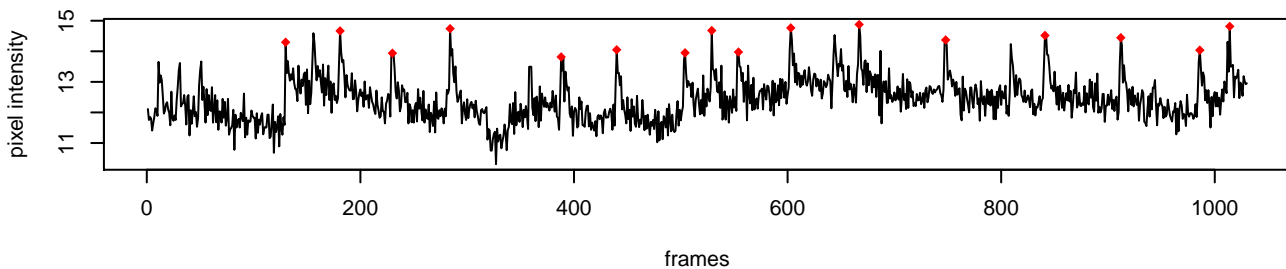

**Graph 14 , 18    Total Activity 5    Position in Array 674**

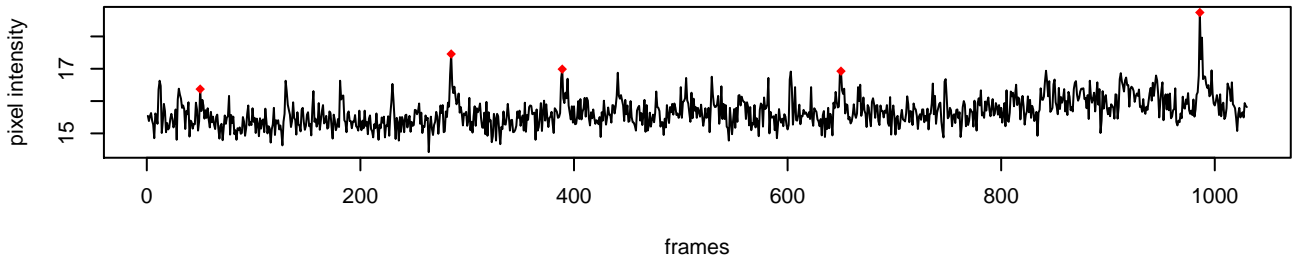

**Graph 15 , 18    Total Activity 6    Position in Array 675**

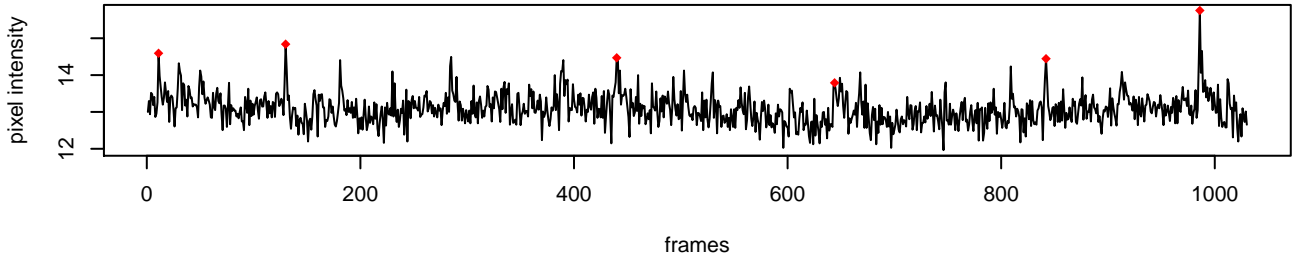

**Graph 16 , 18    Total Activity 21    Position in Array 676**

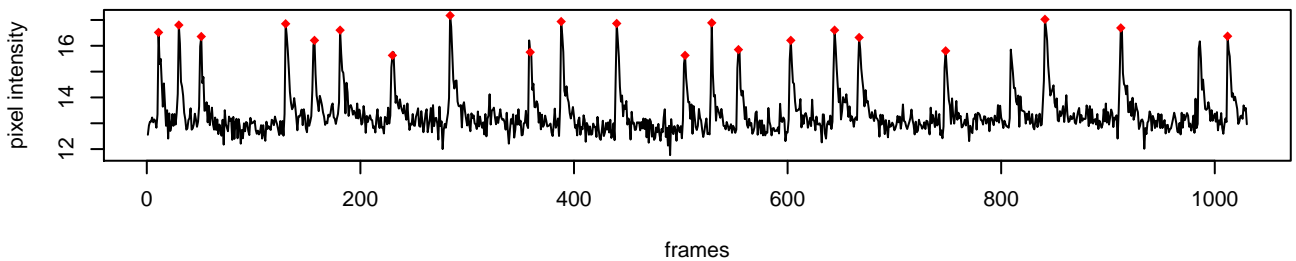

**Graph 21 , 18    Total Activity 4    Position in Array 681**

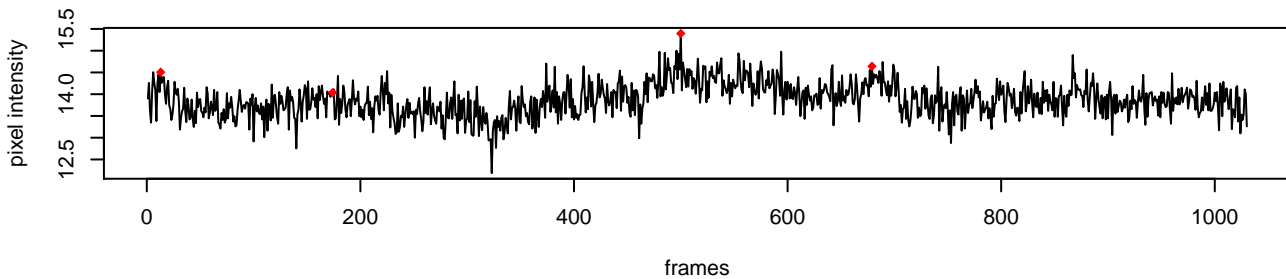

**Graph 23 , 18    Total Activity 4    Position in Array 683**

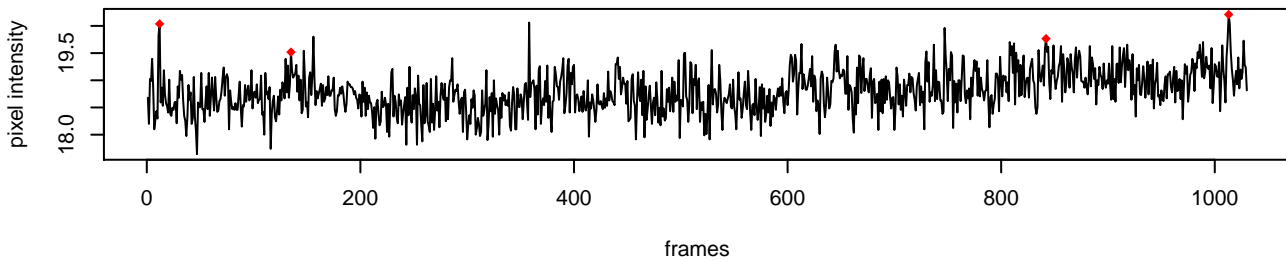

**Graph 24 , 18    Total Activity 22    Position in Array 684**

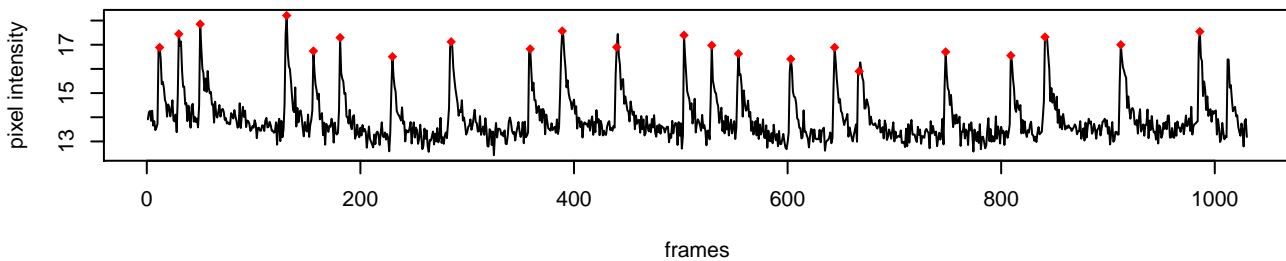

**Graph 30 , 18    Total Activity 3    Position in Array 690**

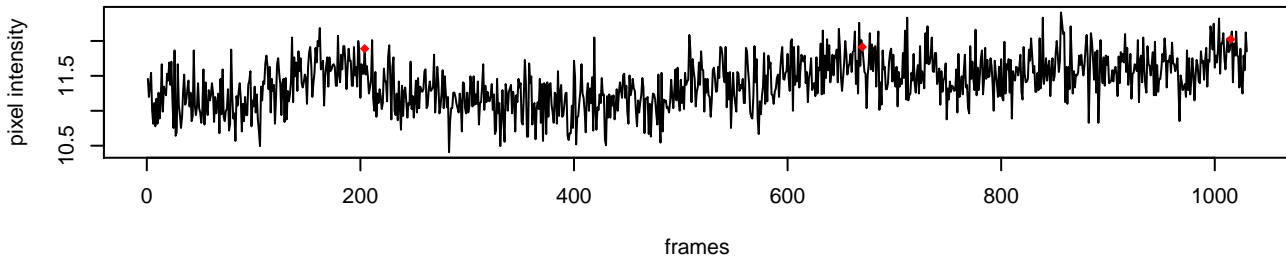

**Graph 32 , 18    Total Activity 2    Position in Array 692**

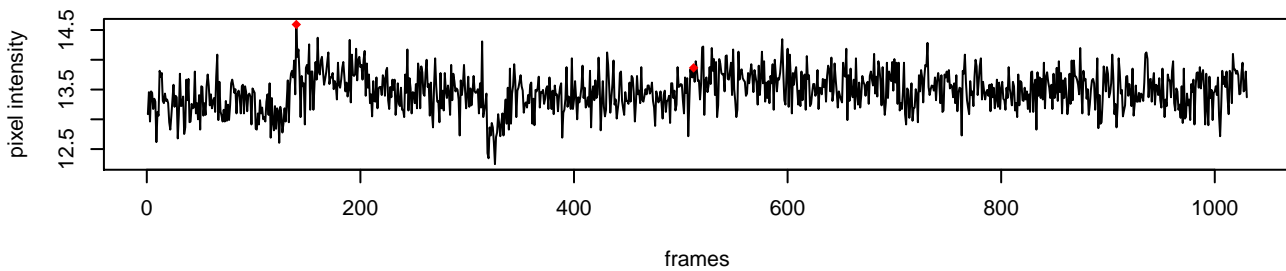

**Graph 33 , 18    Total Activity 2    Position in Array 693**

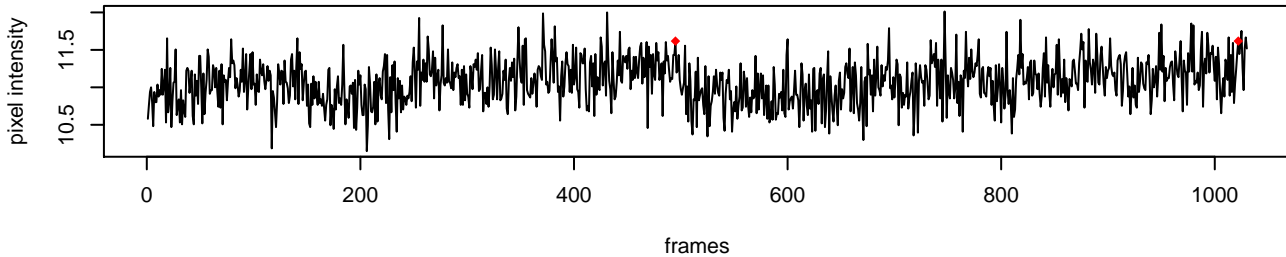

**Graph 34 , 18    Total Activity 3    Position in Array 694**

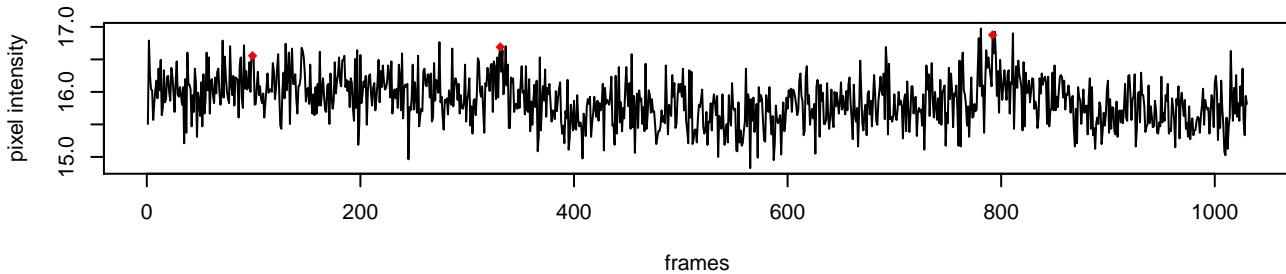

**Graph 35 , 18    Total Activity 4    Position in Array 695**

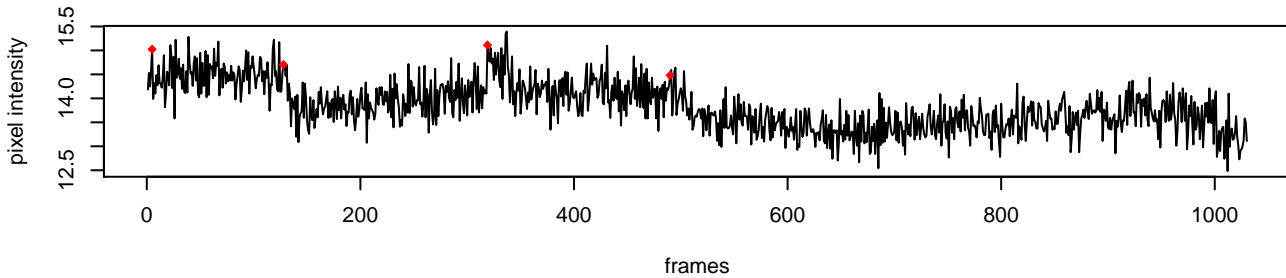

**Graph 36 , 18    Total Activity 2    Position in Array 696**

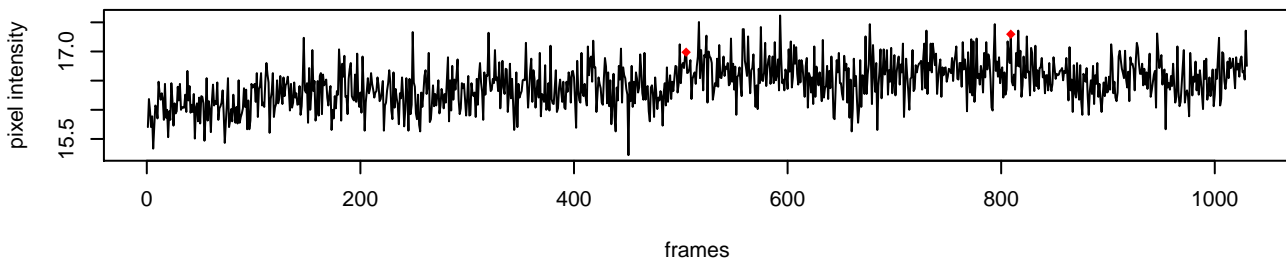

**Graph 37 , 18    Total Activity 4    Position in Array 697**

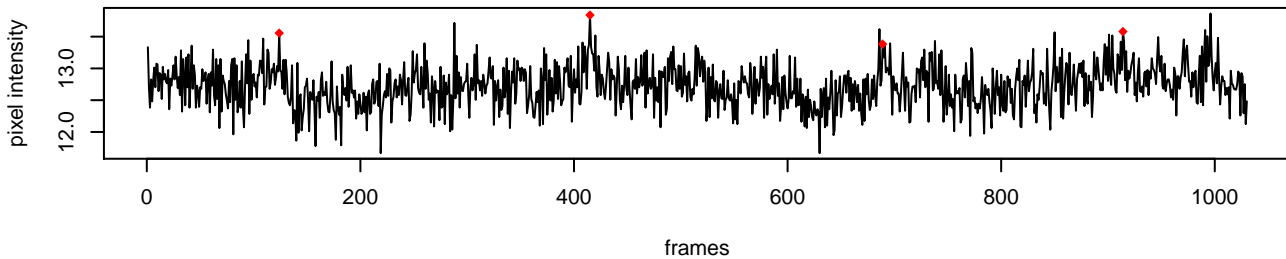

**Graph 38 , 18    Total Activity 4    Position in Array 698**

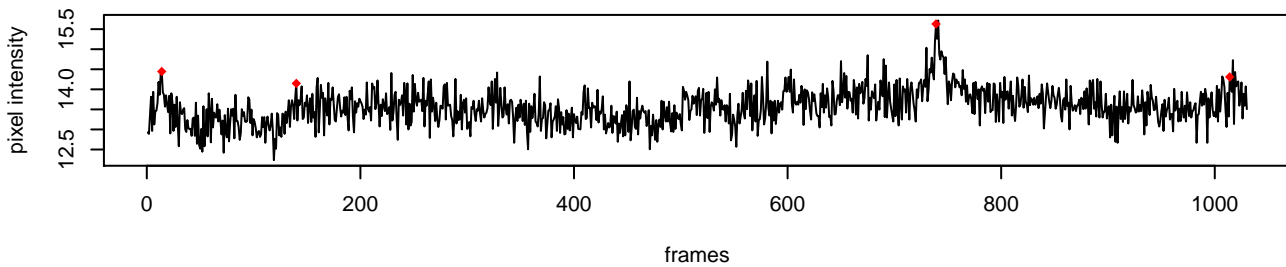

**Graph 39 , 18    Total Activity 3    Position in Array 699**

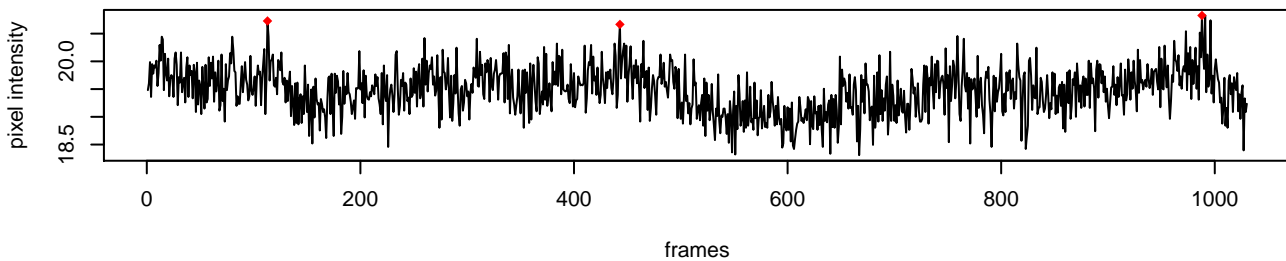

**Graph 2 , 17    Total Activity 3    Position in Array 706**

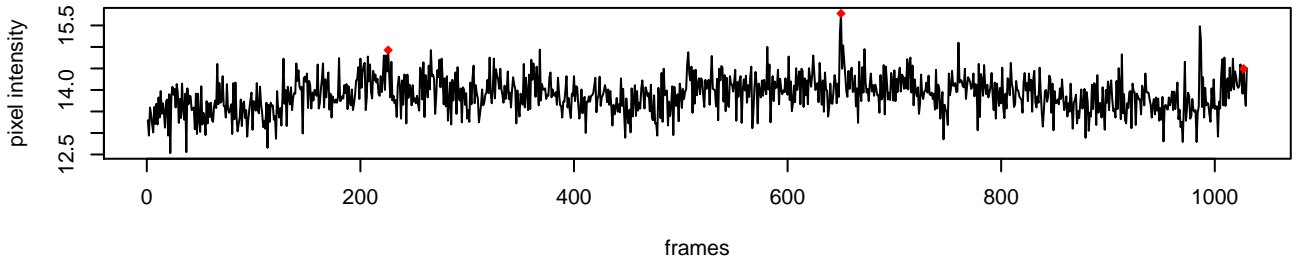

**Graph 3 , 17    Total Activity 12    Position in Array 707**

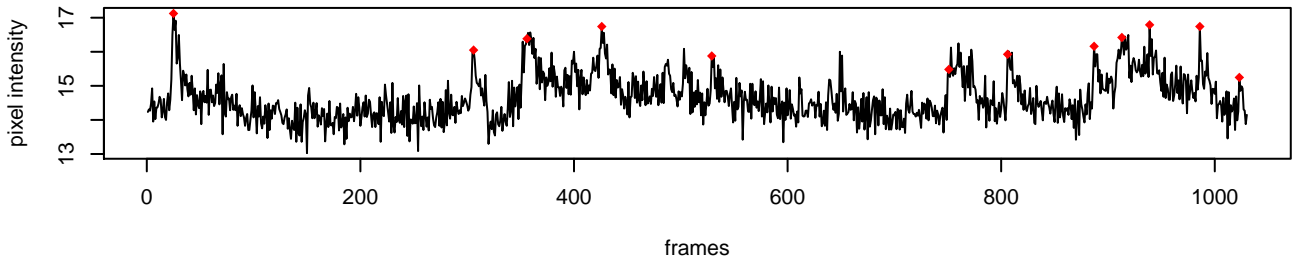

**Graph 6 , 17    Total Activity 8    Position in Array 710**

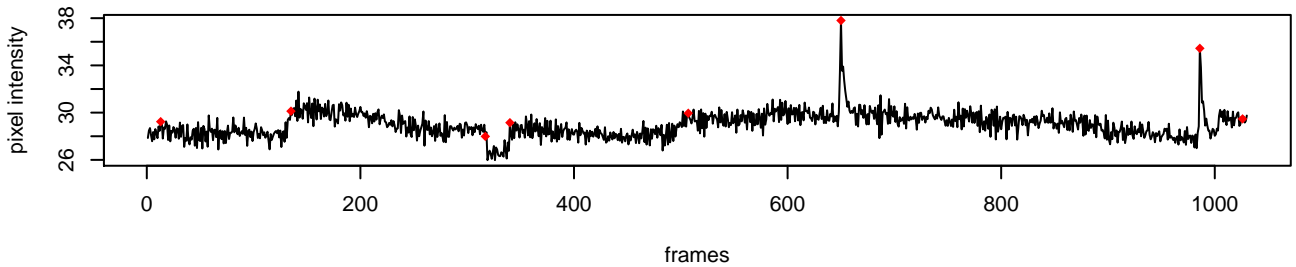



**Graph 7 , 17    Total Activity 6    Position in Array 711**

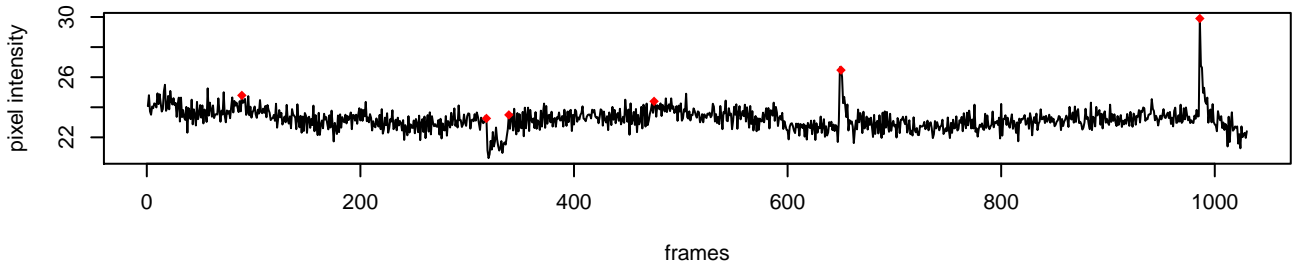

**Graph 12 , 17    Total Activity 17    Position in Array 716**

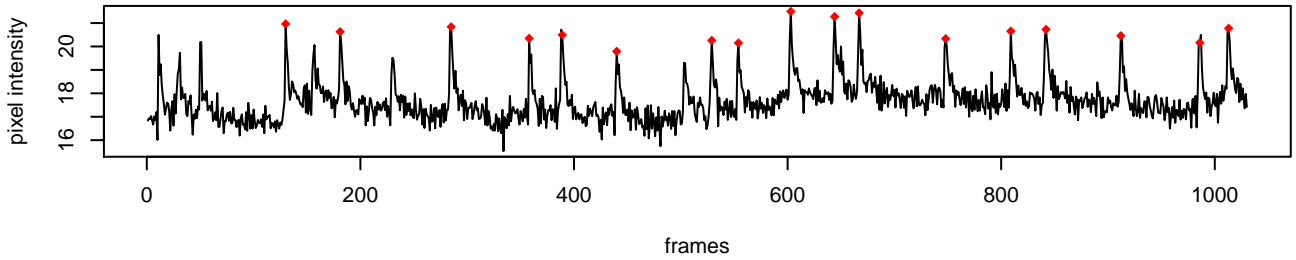

**Graph 13 , 17    Total Activity 16    Position in Array 717**

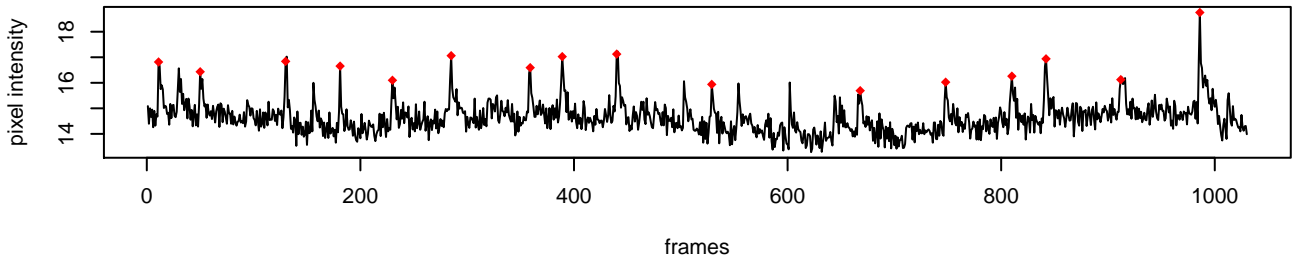

**Graph 14 , 17    Total Activity 3    Position in Array 718**

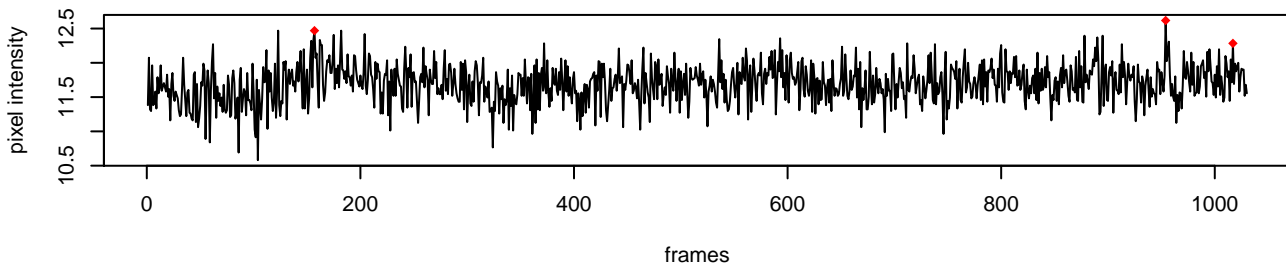

**Graph 16 , 17    Total Activity 10    Position in Array 720**

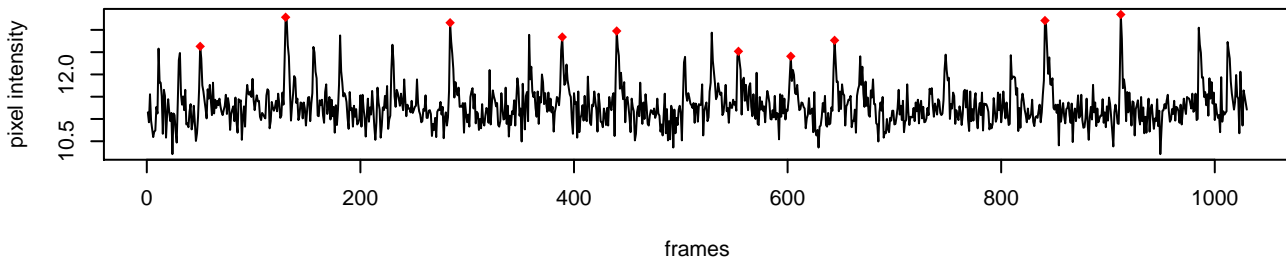

**Graph 18 , 17    Total Activity 5    Position in Array 722**

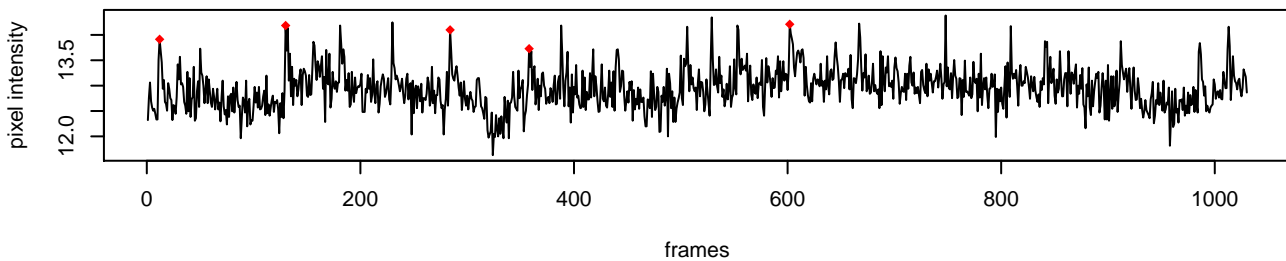

**Graph 21 , 17    Total Activity 16    Position in Array 725**

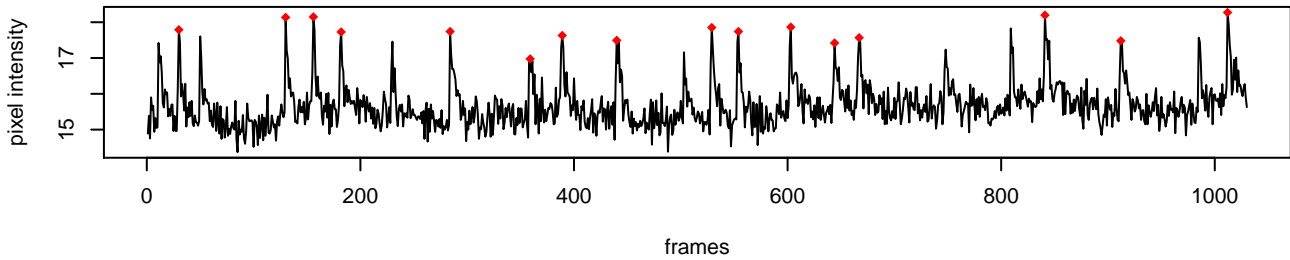

**Graph 22 , 17    Total Activity 19    Position in Array 726**

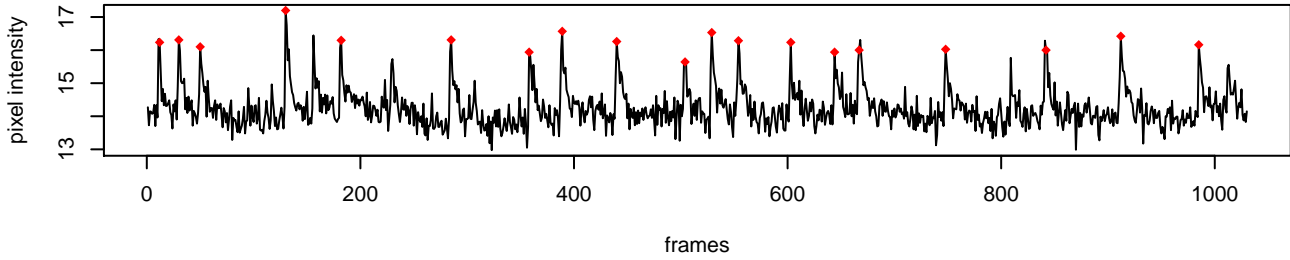

**Graph 23 , 17    Total Activity 2    Position in Array 727**

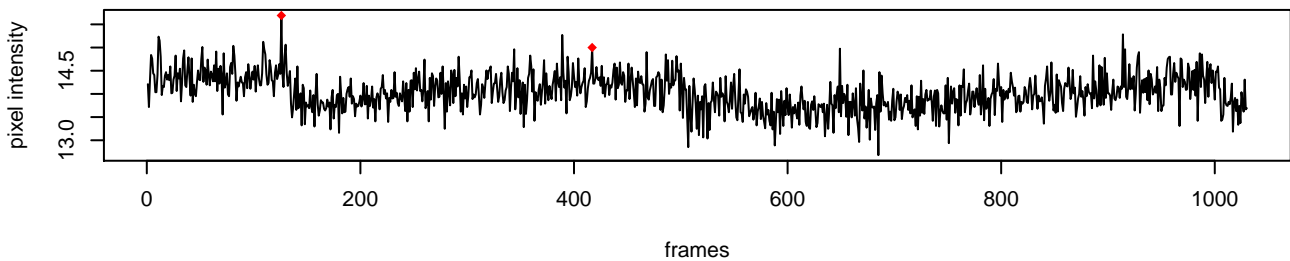

**Graph 30 , 17    Total Activity 4    Position in Array 734**

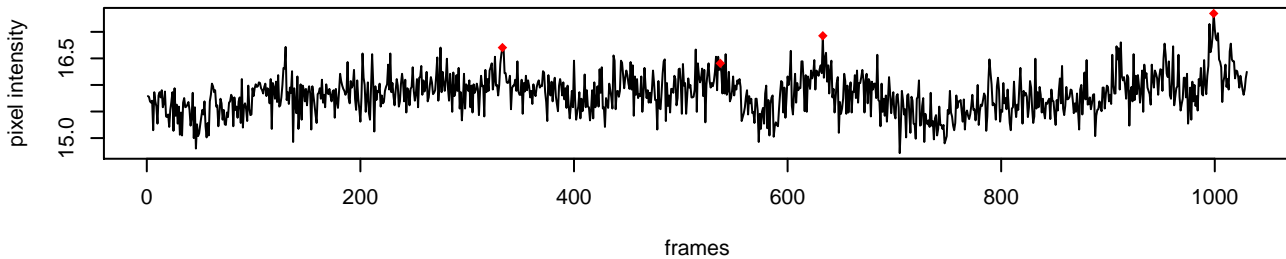

**Graph 31 , 17    Total Activity 2    Position in Array 735**

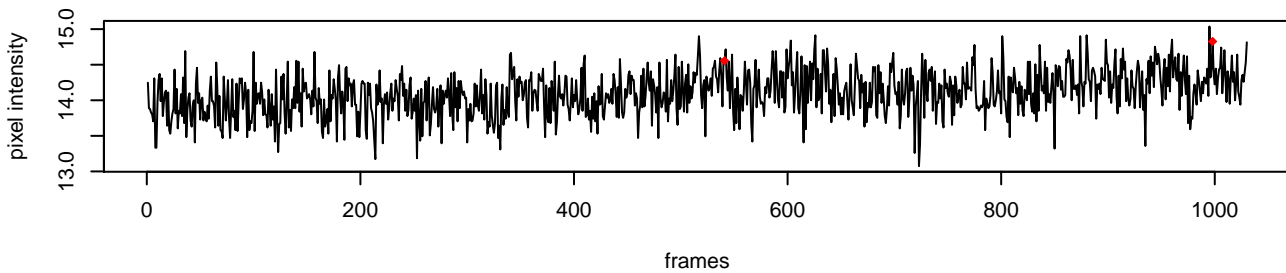

**Graph 32 , 17    Total Activity 4    Position in Array 736**

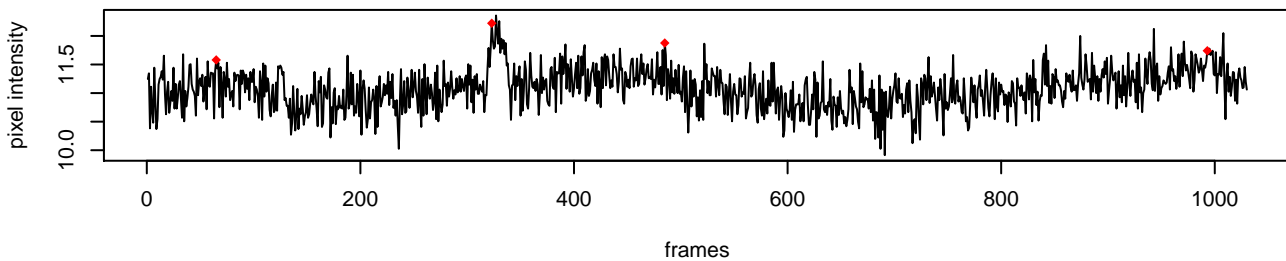

**Graph 33 , 17    Total Activity 2    Position in Array 737**

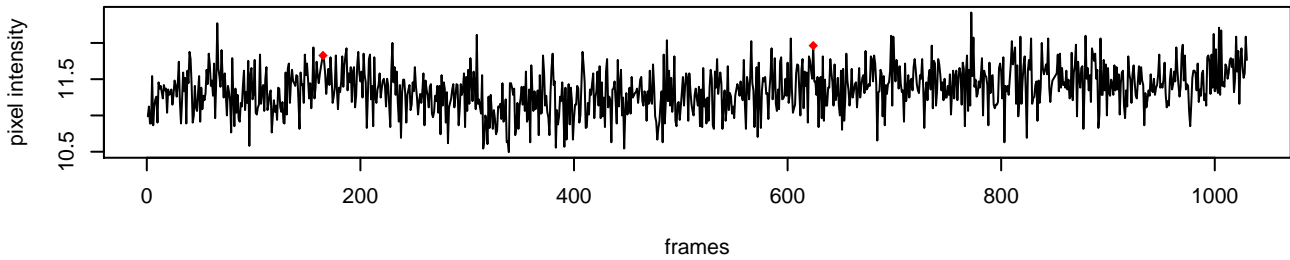

**Graph 36 , 17    Total Activity 3    Position in Array 740**

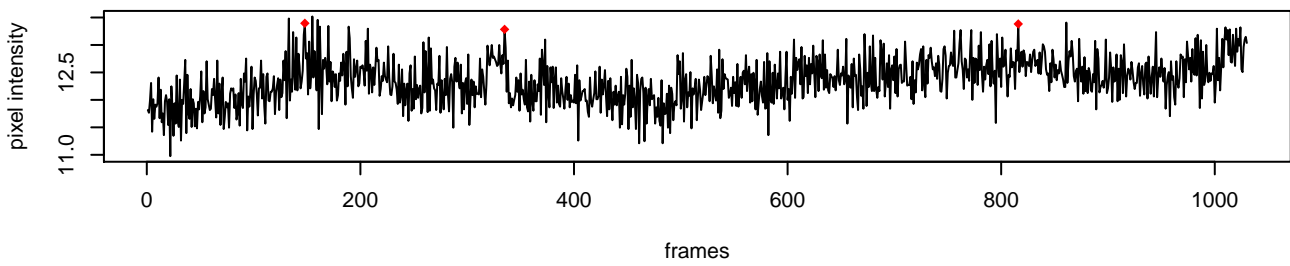

**Graph 37 , 17    Total Activity 5    Position in Array 741**

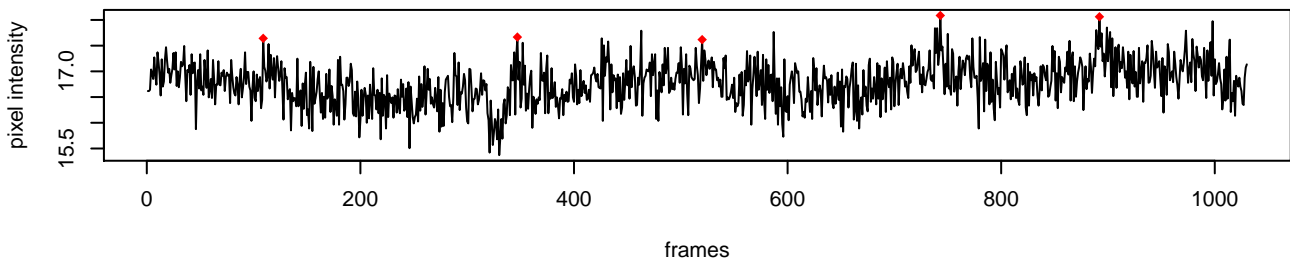

**Graph 39 , 17    Total Activity 4    Position in Array 743**

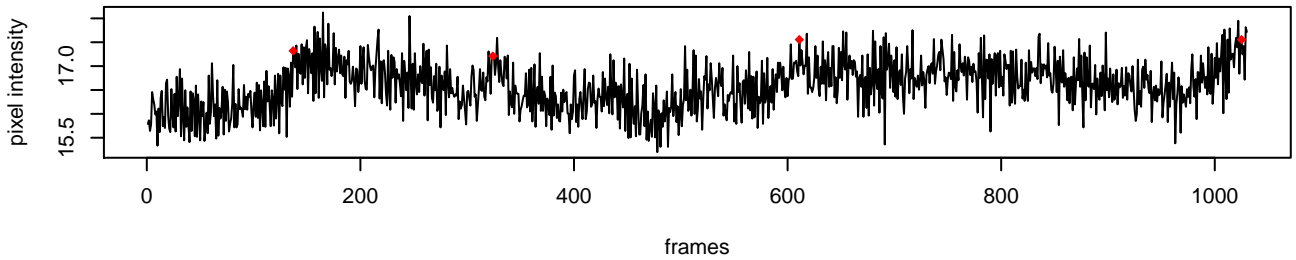

**Graph 40 , 17    Total Activity 4    Position in Array 744**

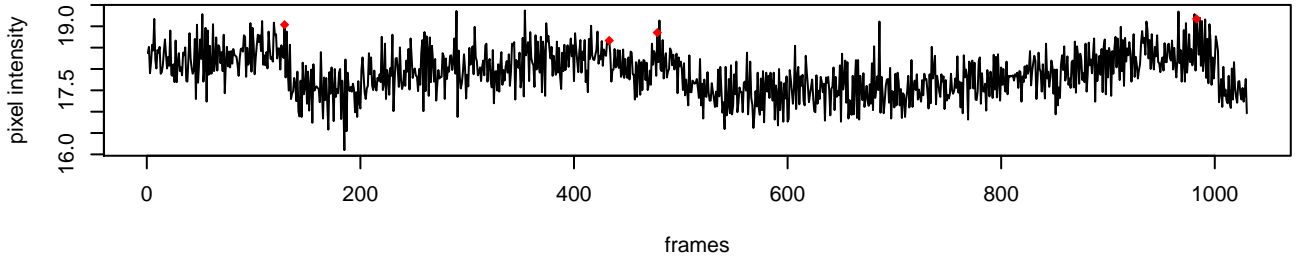

**Graph 3 , 16    Total Activity 4    Position in Array 751**

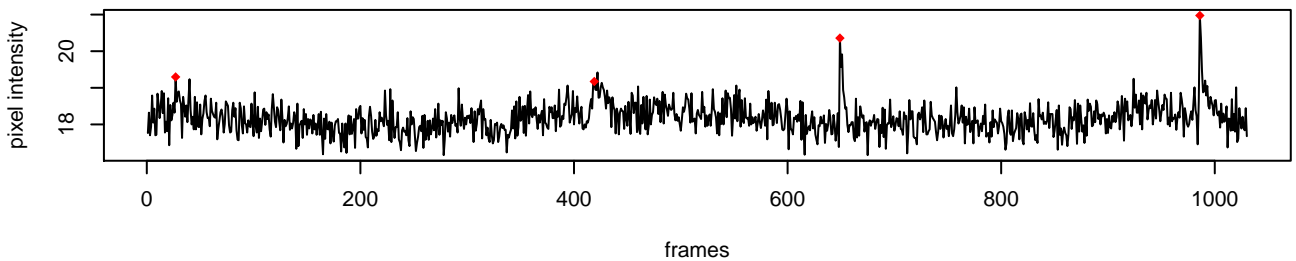

**Graph 4 , 16    Total Activity 6    Position in Array 752**

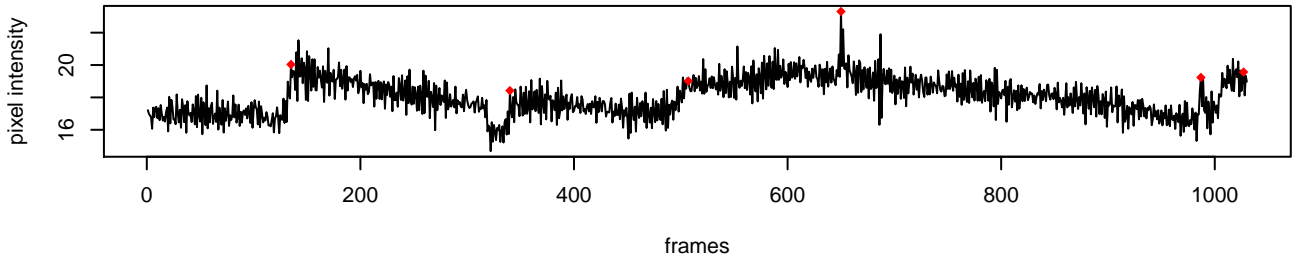

**Graph 5 , 16    Total Activity 7    Position in Array 753**

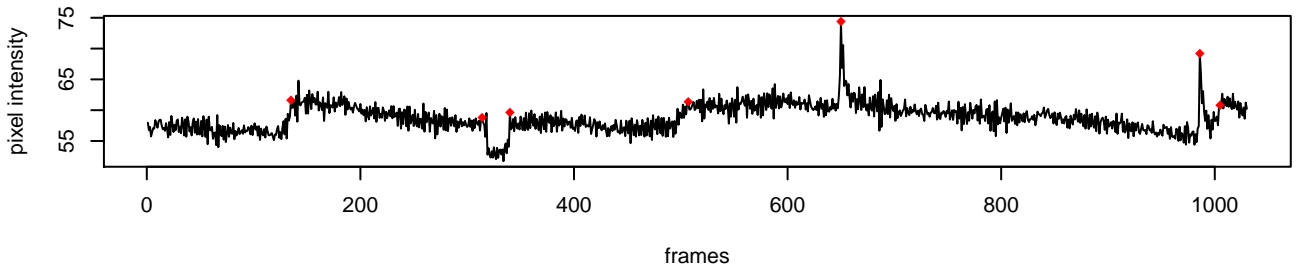

**Graph 6 , 16    Total Activity 8    Position in Array 754**

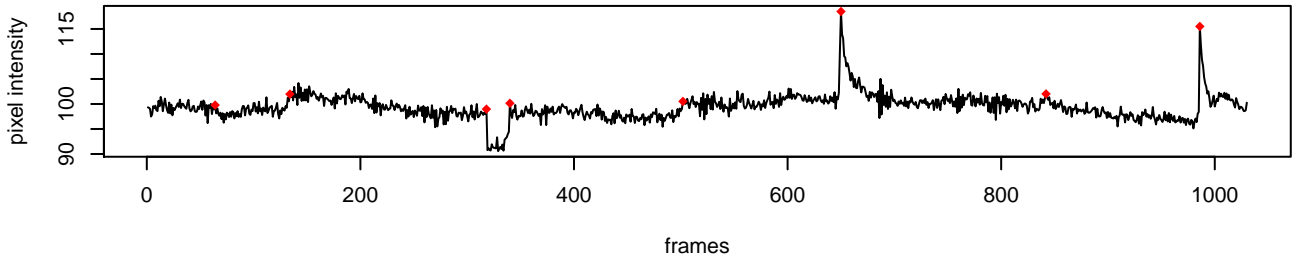

**Graph 7 , 16    Total Activity 6    Position in Array 755**

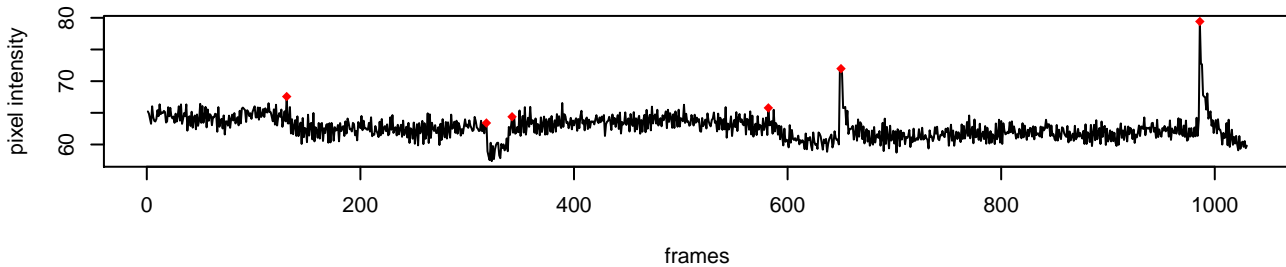

**Graph 8 , 16    Total Activity 9    Position in Array 756**

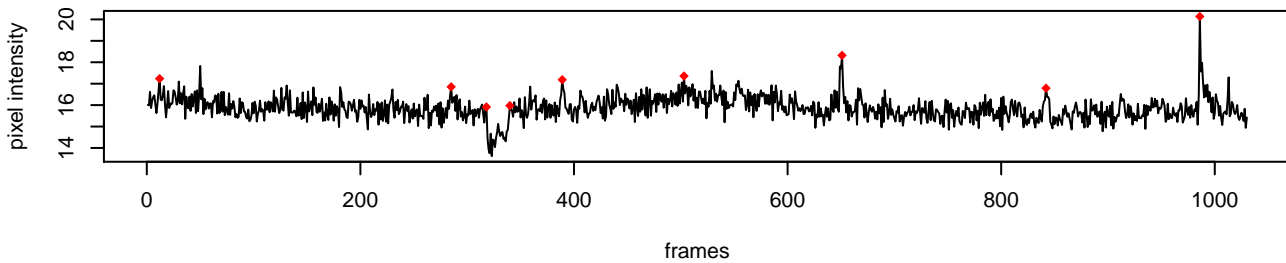

**Graph 9 , 16    Total Activity 6    Position in Array 757**

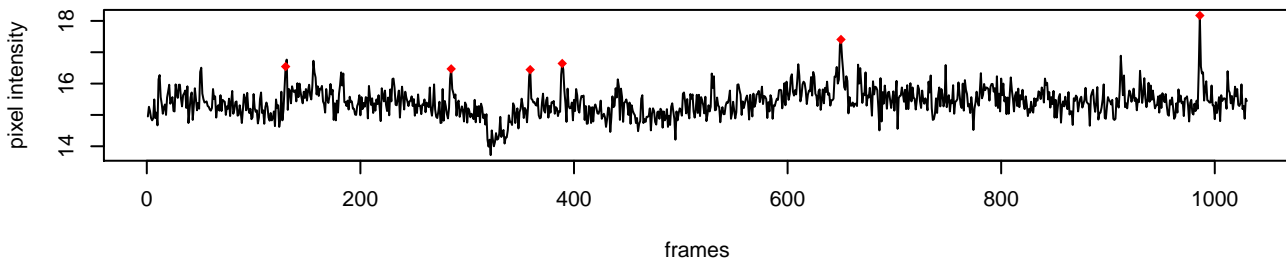



**Graph 10 , 16    Total Activity 6    Position in Array 758**

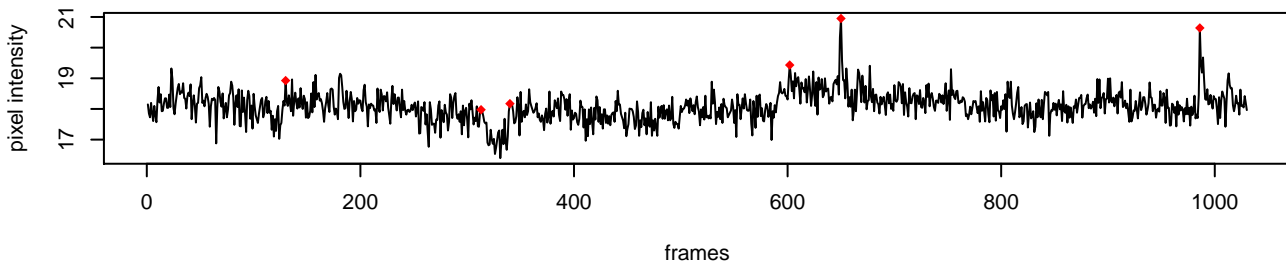

**Graph 11 , 16    Total Activity 3    Position in Array 759**

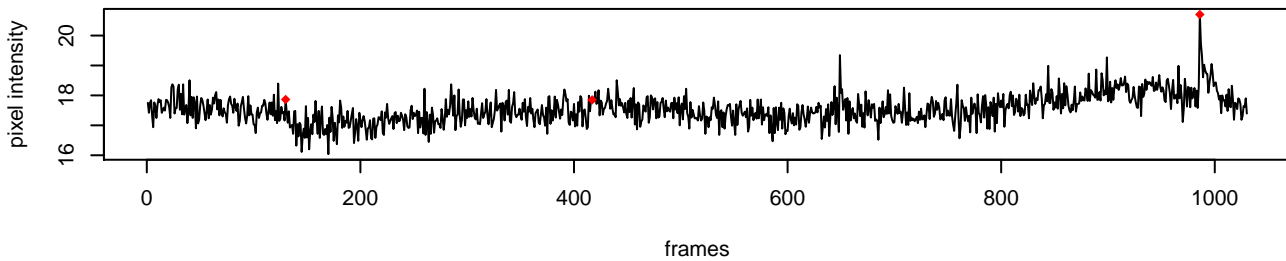

**Graph 16 , 16    Total Activity 4    Position in Array 764**

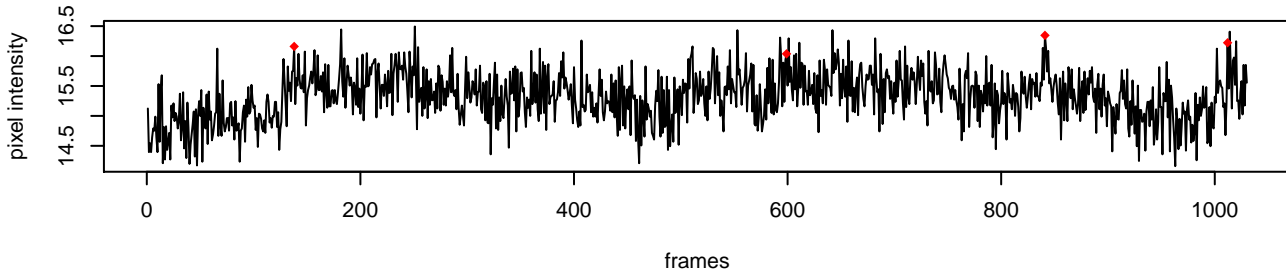

**Graph 17 , 16    Total Activity 5    Position in Array 765**

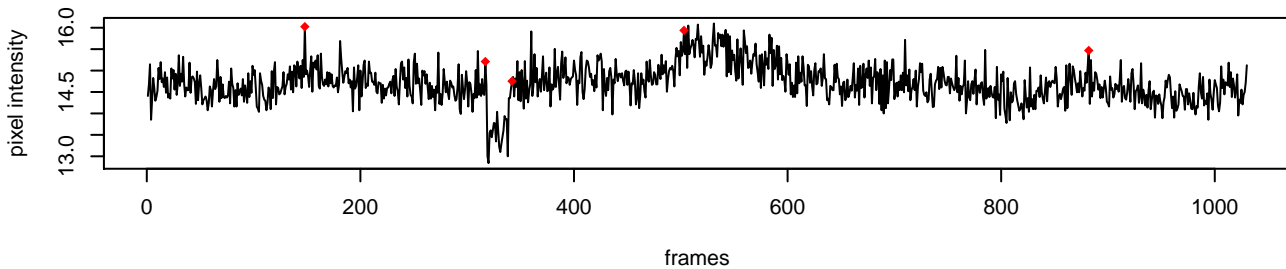

**Graph 18 , 16    Total Activity 5    Position in Array 766**

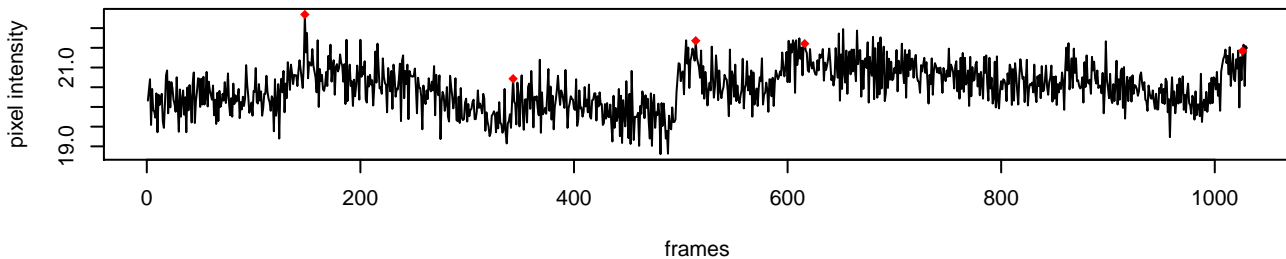

**Graph 19 , 16    Total Activity 6    Position in Array 767**

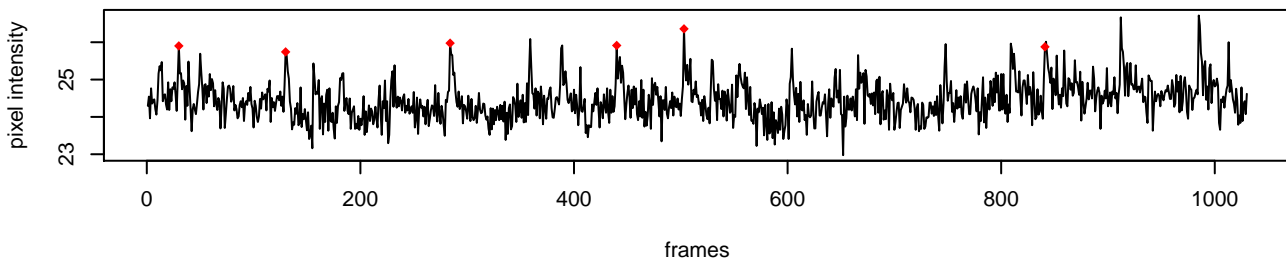

**Graph 20 , 16    Total Activity 5    Position in Array 768**

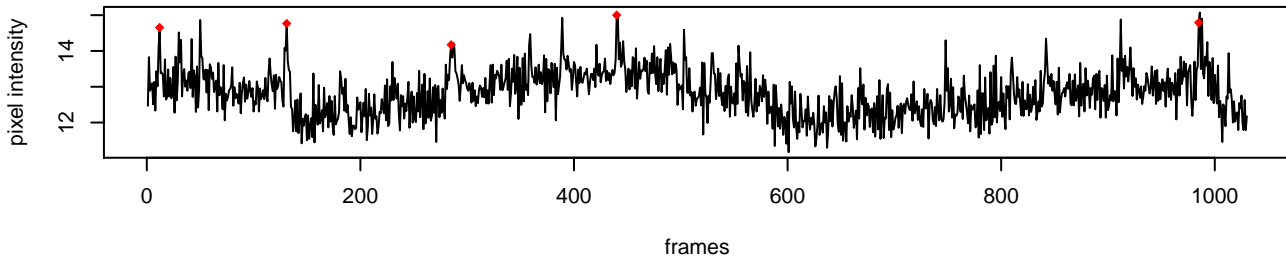

**Graph 22 , 16    Total Activity 5    Position in Array 770**

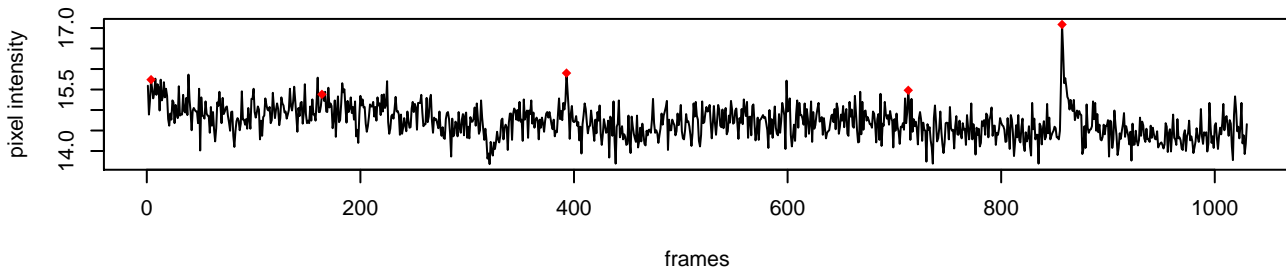

**Graph 23 , 16    Total Activity 3    Position in Array 771**

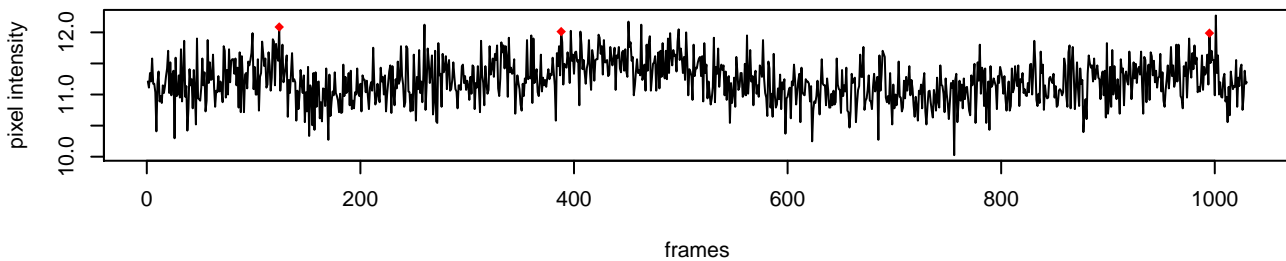

**Graph 26 , 16    Total Activity 4    Position in Array 774**

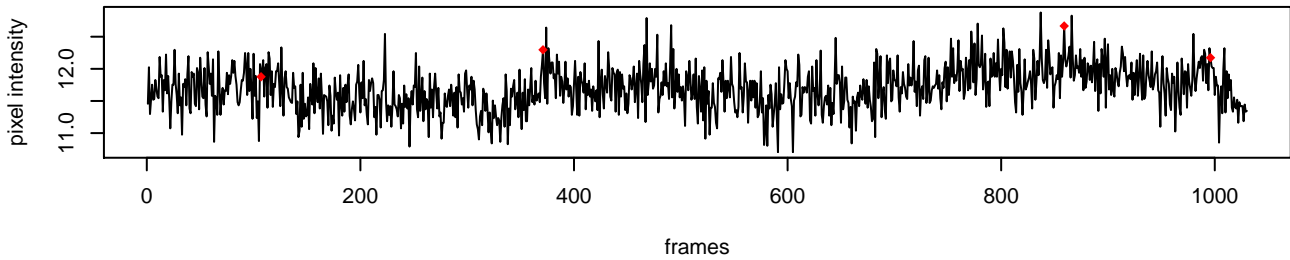

**Graph 29 , 16    Total Activity 5    Position in Array 777**

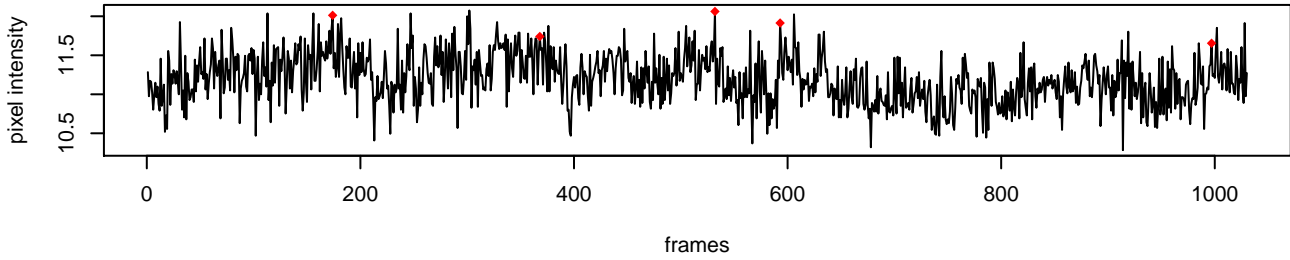

**Graph 33 , 16    Total Activity 3    Position in Array 781**

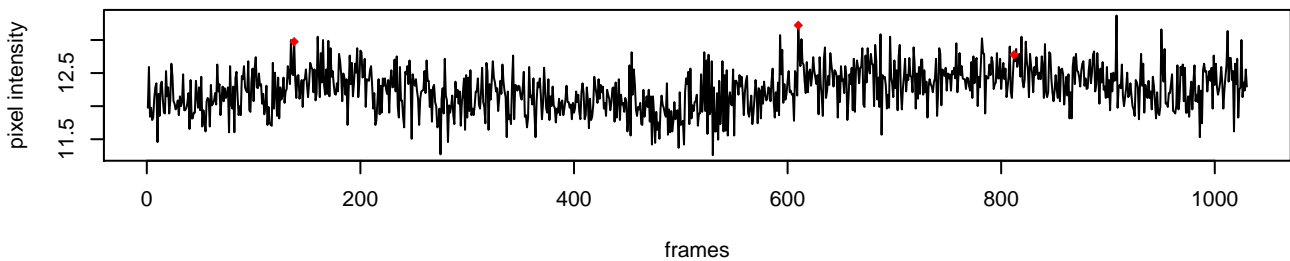

**Graph 34 , 16    Total Activity 3    Position in Array 782**

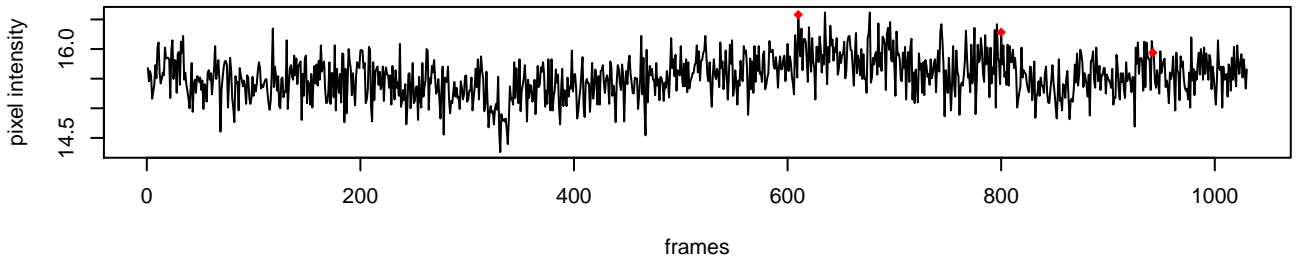

**Graph 36 , 16    Total Activity 3    Position in Array 784**

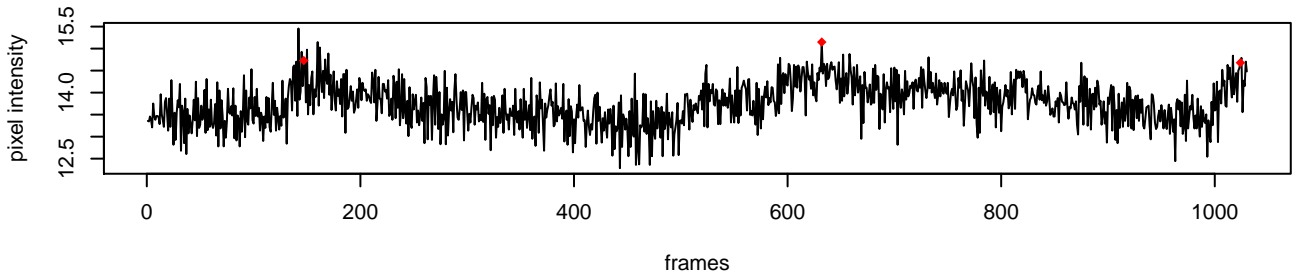

**Graph 37 , 16    Total Activity 4    Position in Array 785**

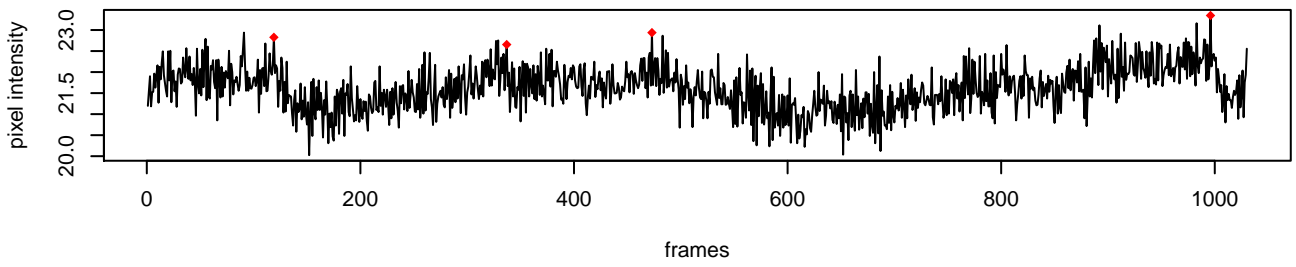

**Graph 40 , 16    Total Activity 4    Position in Array 788**

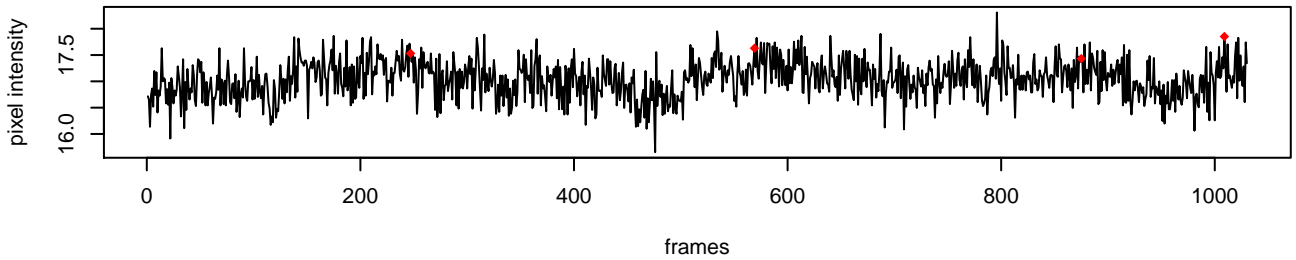

**Graph 41 , 16    Total Activity 5    Position in Array 789**

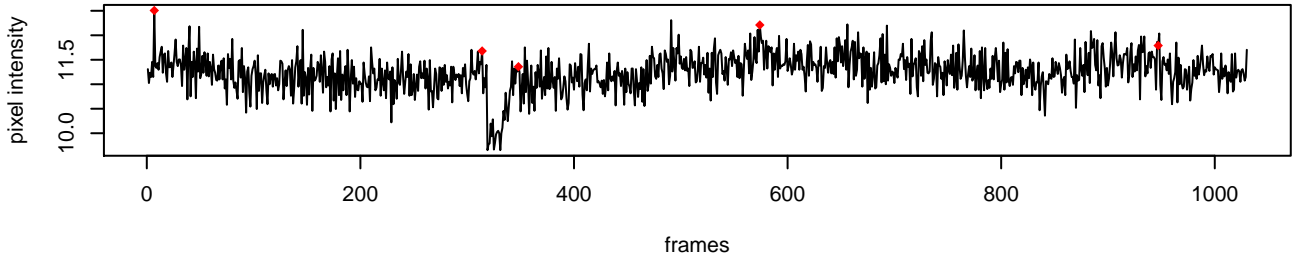

**Graph 2 , 15    Total Activity 4    Position in Array 794**

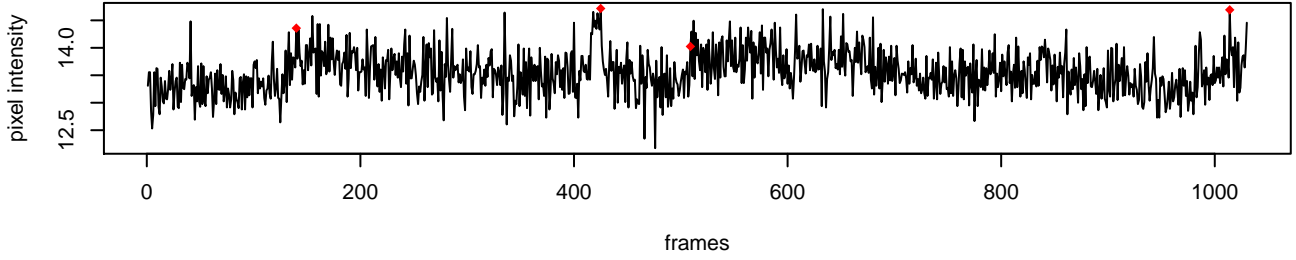

**Graph 3 , 15    Total Activity 5    Position in Array 795**

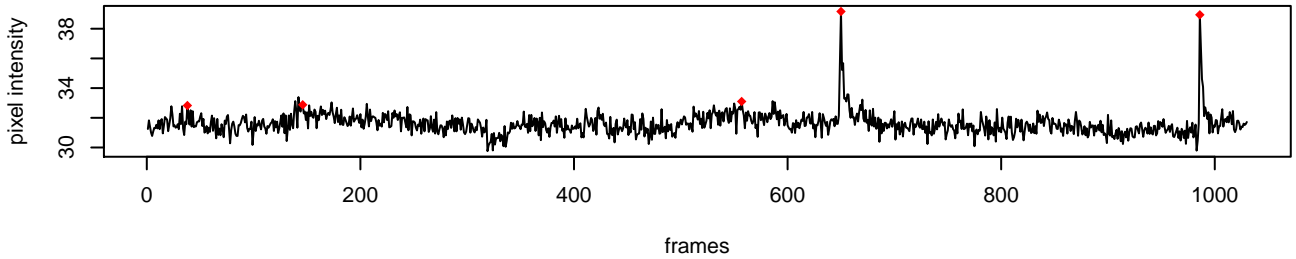

**Graph 4 , 15    Total Activity 8    Position in Array 796**

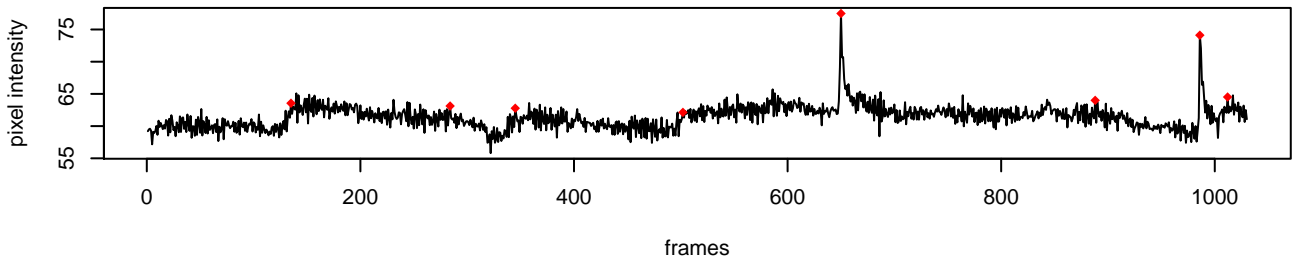

**Graph 5 , 15    Total Activity 7    Position in Array 797**

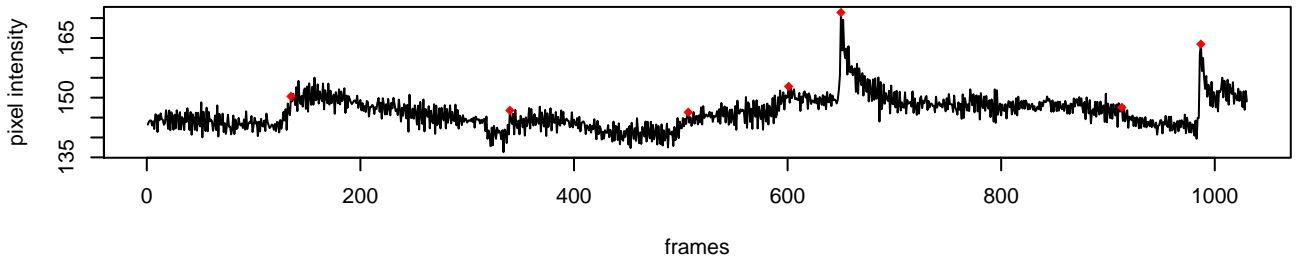

**Graph 6 , 15    Total Activity 10    Position in Array 798**

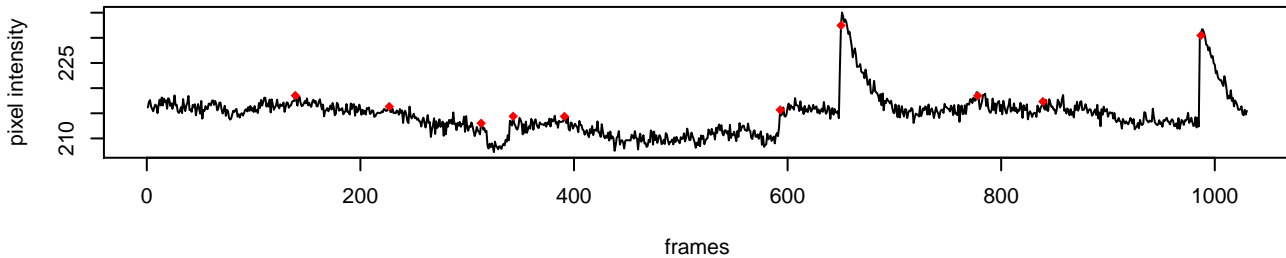

**Graph 7 , 15    Total Activity 6    Position in Array 799**

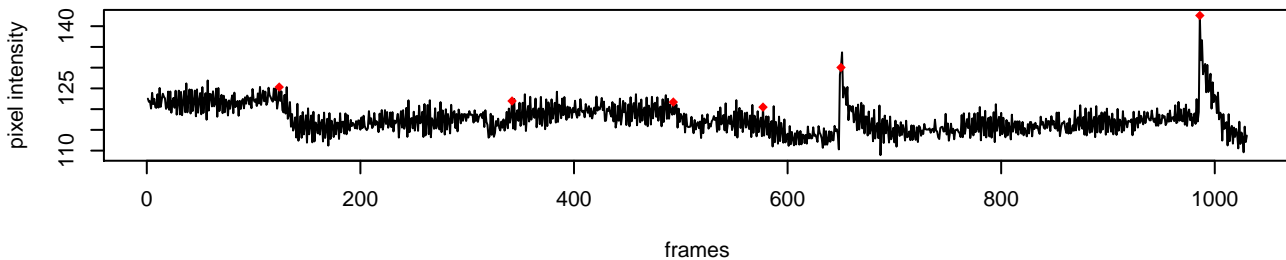

**Graph 8 , 15    Total Activity 5    Position in Array 800**

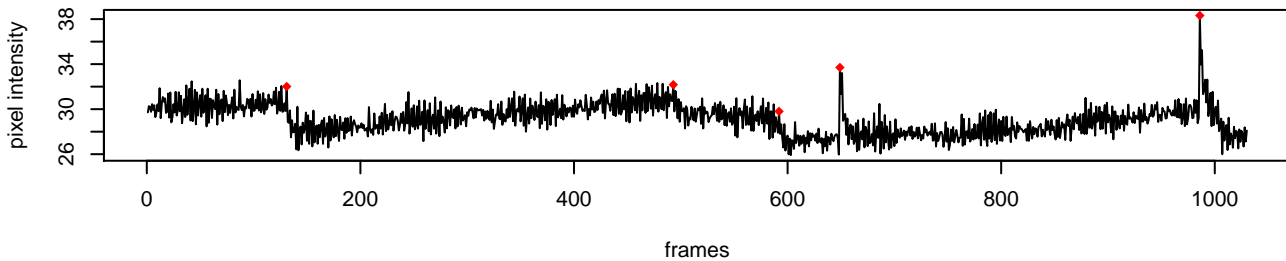



**Graph 10 , 15    Total Activity 4    Position in Array 802**

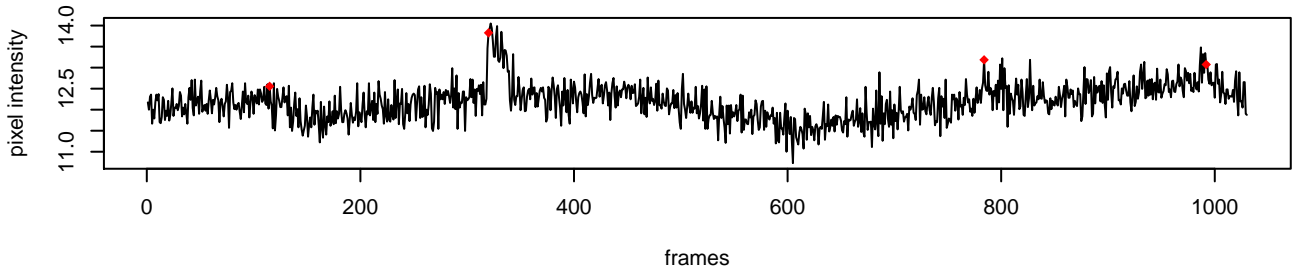

**Graph 13 , 15    Total Activity 6    Position in Array 805**

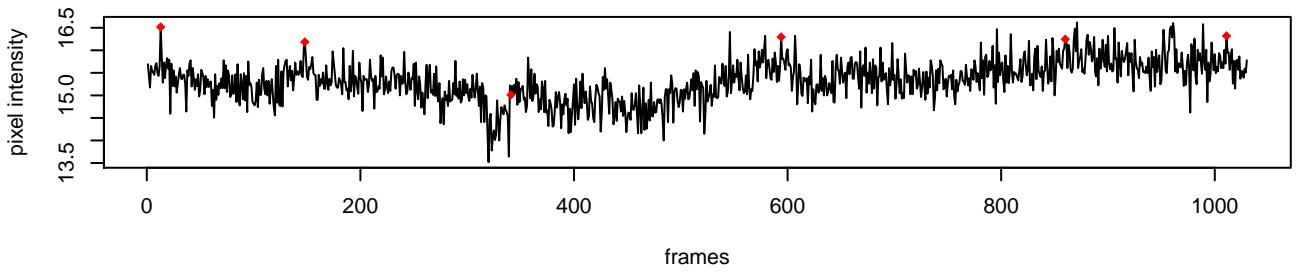

**Graph 15 , 15    Total Activity 4    Position in Array 807**

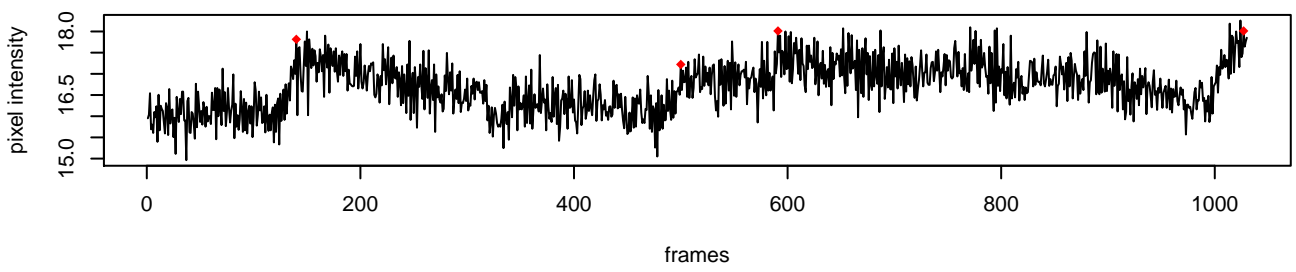

**Graph 16 , 15    Total Activity 5    Position in Array 808**

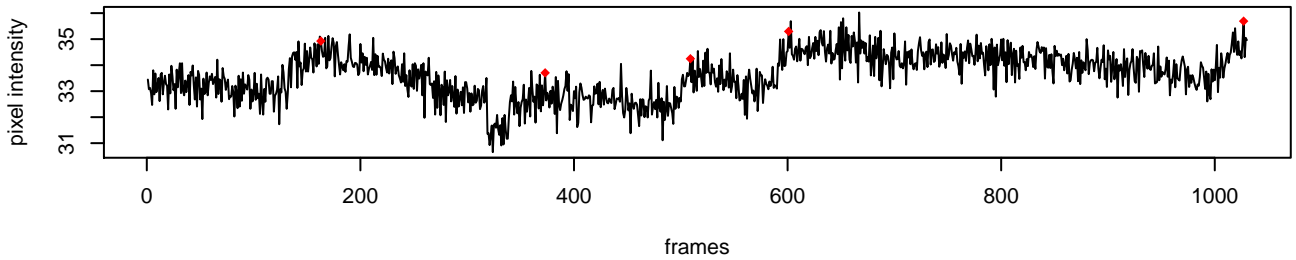

**Graph 17 , 15    Total Activity 6    Position in Array 809**

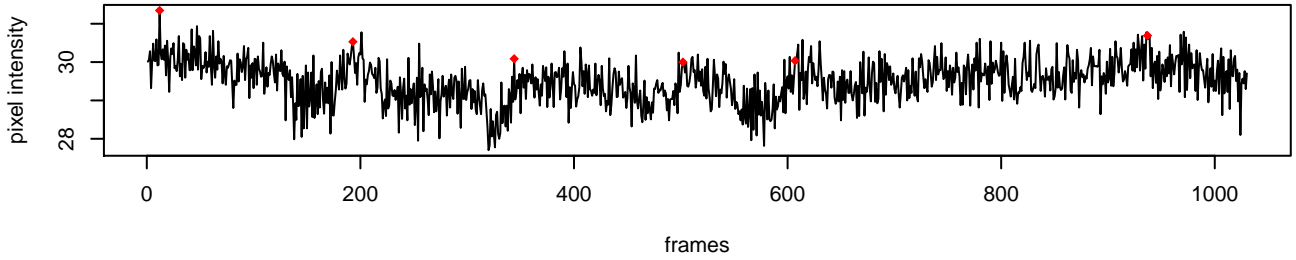

**Graph 18 , 15    Total Activity 4    Position in Array 810**

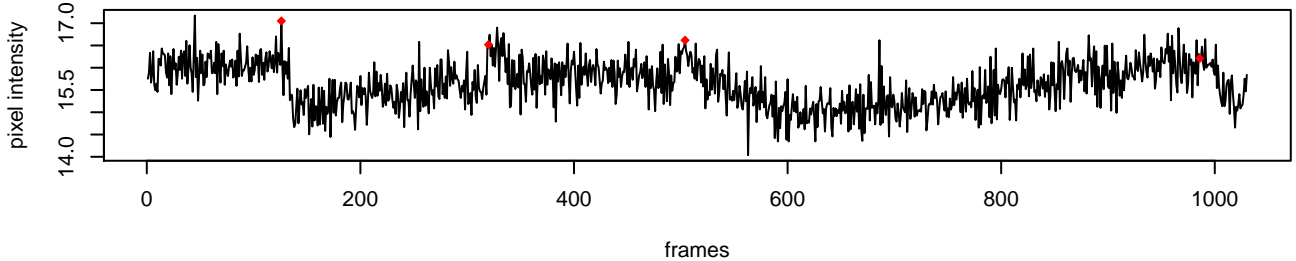

**Graph 19 , 15    Total Activity 4    Position in Array 811**

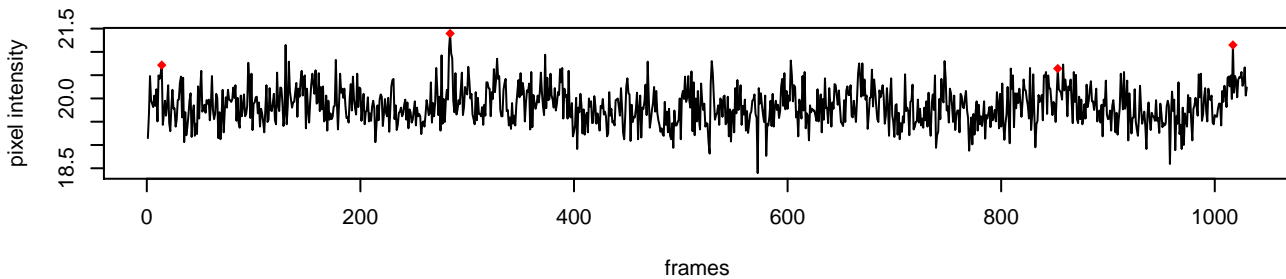

**Graph 22 , 15    Total Activity 4    Position in Array 814**

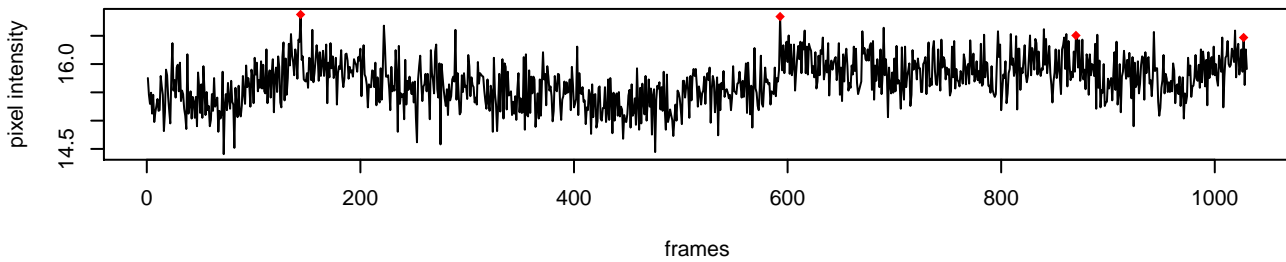

**Graph 23 , 15    Total Activity 4    Position in Array 815**

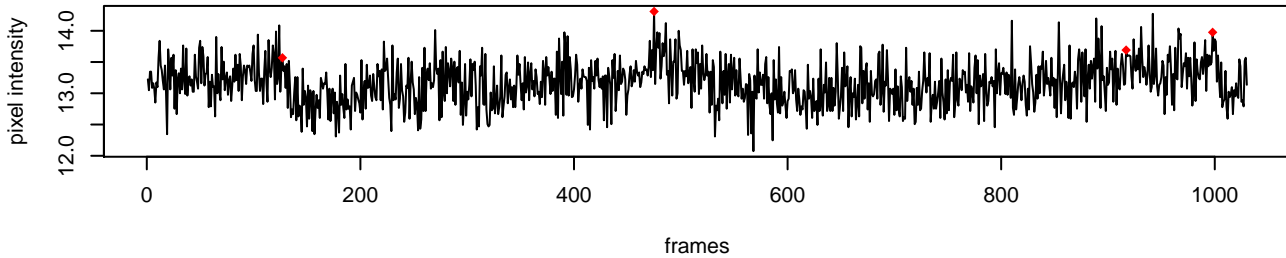

**Graph 24 , 15    Total Activity 3    Position in Array 816**

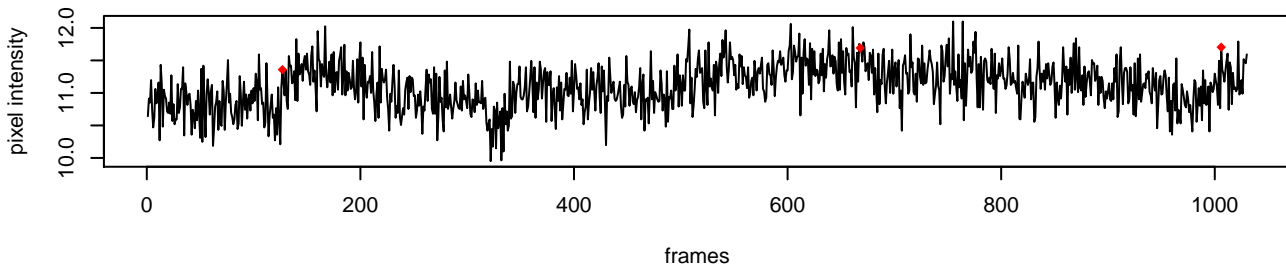

**Graph 25 , 15    Total Activity 4    Position in Array 817**

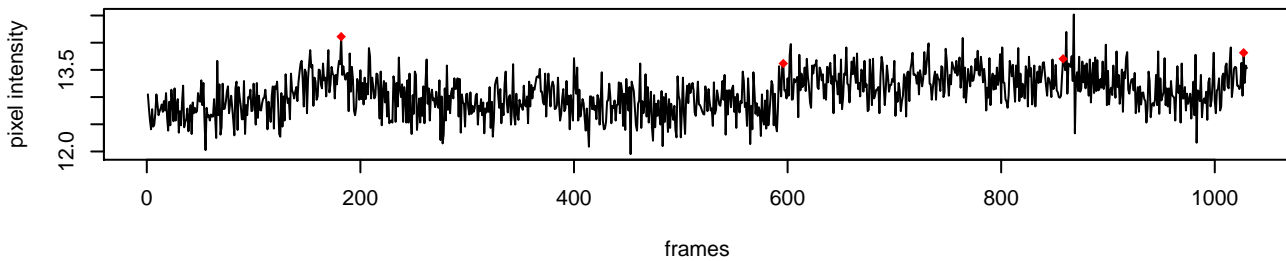

**Graph 29 , 15    Total Activity 4    Position in Array 821**

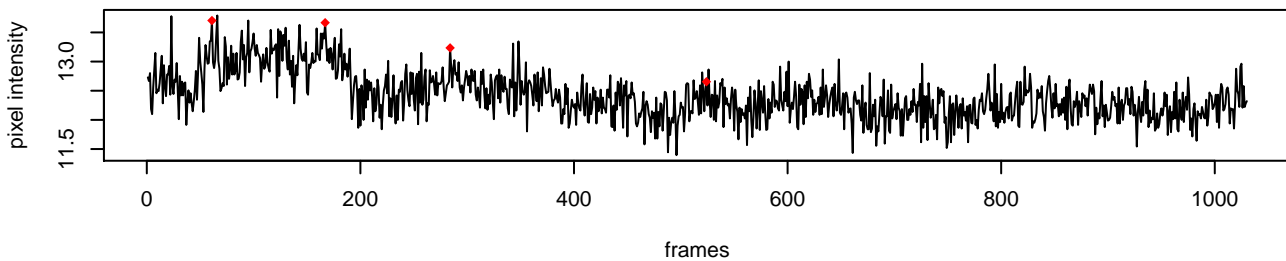

**Graph 33 , 15    Total Activity 2    Position in Array 825**

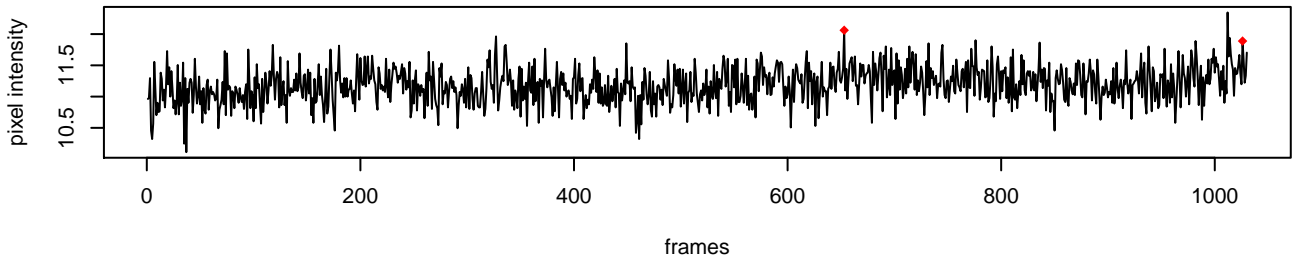

**Graph 34 , 15    Total Activity 7    Position in Array 826**

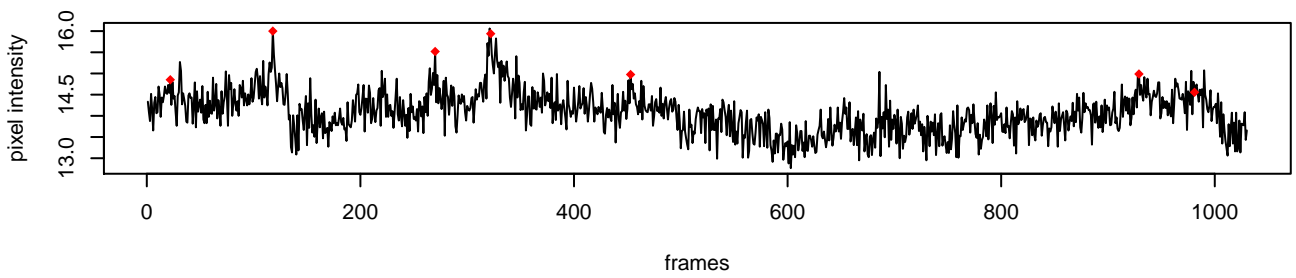

**Graph 37 , 15    Total Activity 4    Position in Array 829**

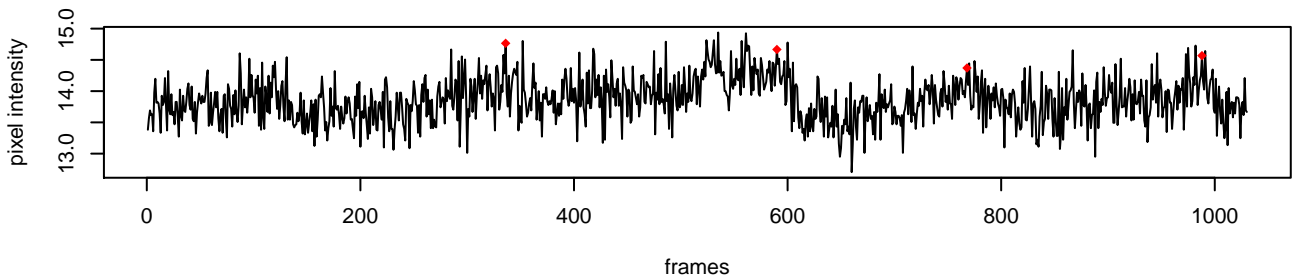

**Graph 40 , 15    Total Activity 4    Position in Array 832**

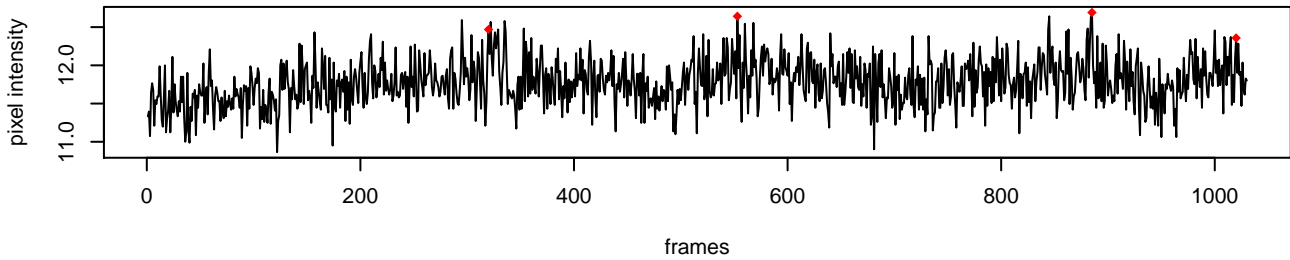

**Graph 41 , 15    Total Activity 4    Position in Array 833**

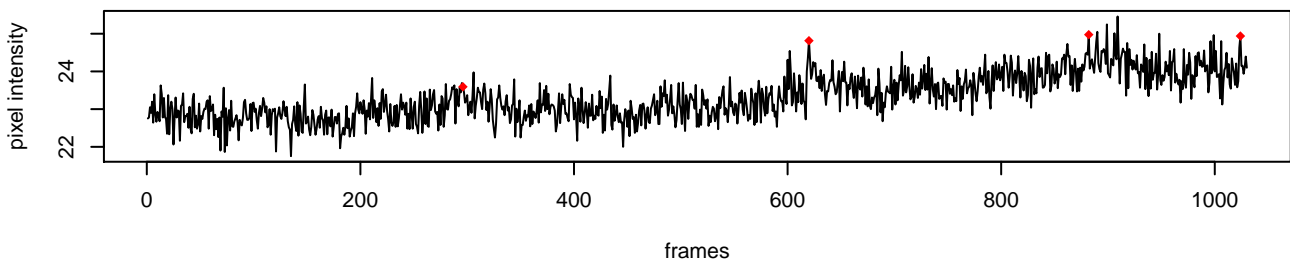

**Graph 3 , 14    Total Activity 4    Position in Array 839**

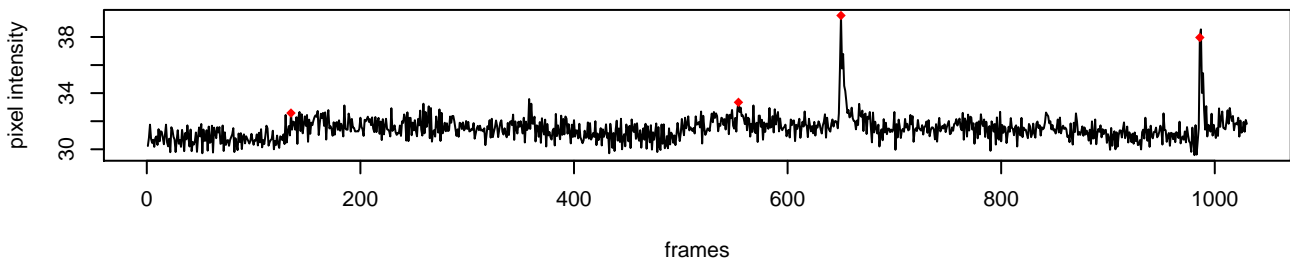

**Graph 4 , 14    Total Activity 7    Position in Array 840**

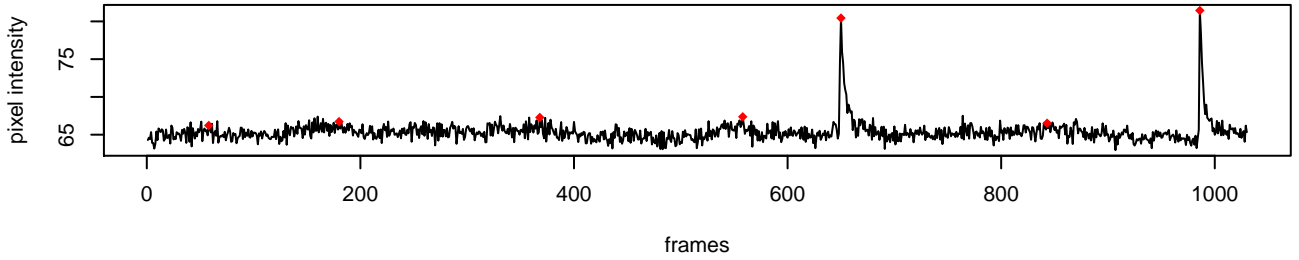

**Graph 5 , 14    Total Activity 7    Position in Array 841**

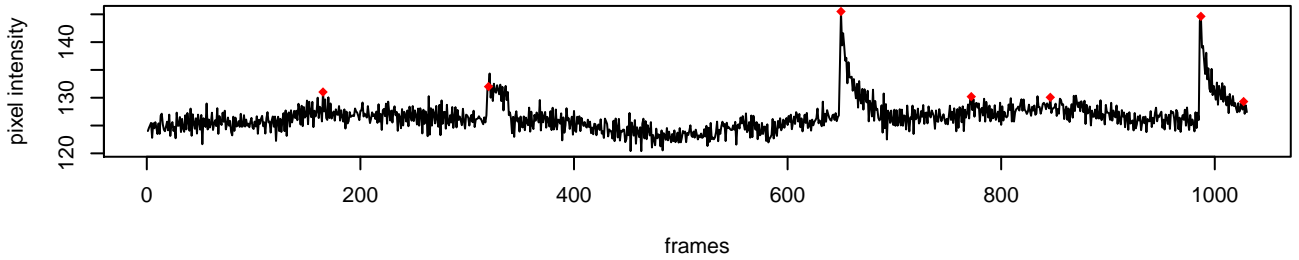

**Graph 6 , 14    Total Activity 7    Position in Array 842**

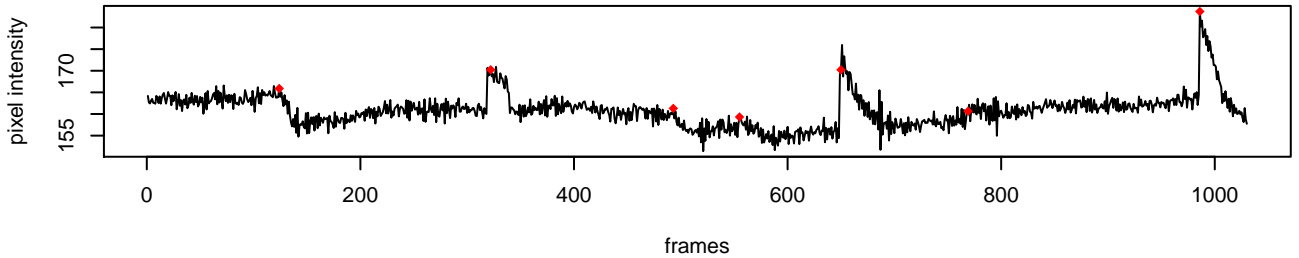

**Graph 7 , 14    Total Activity 6    Position in Array 843**

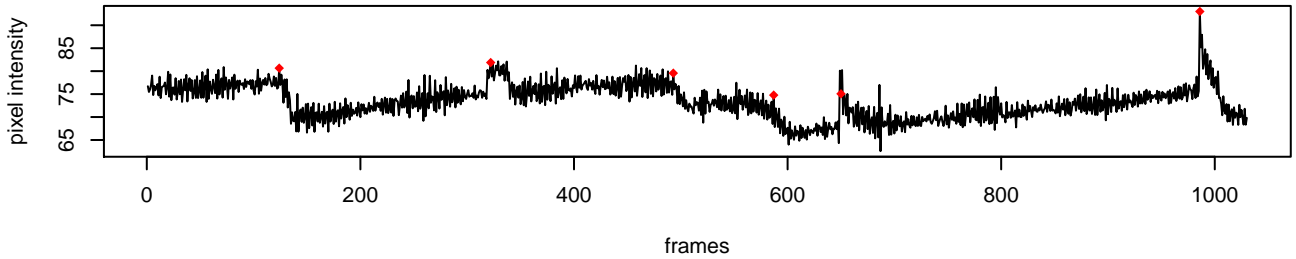

**Graph 8 , 14    Total Activity 4    Position in Array 844**

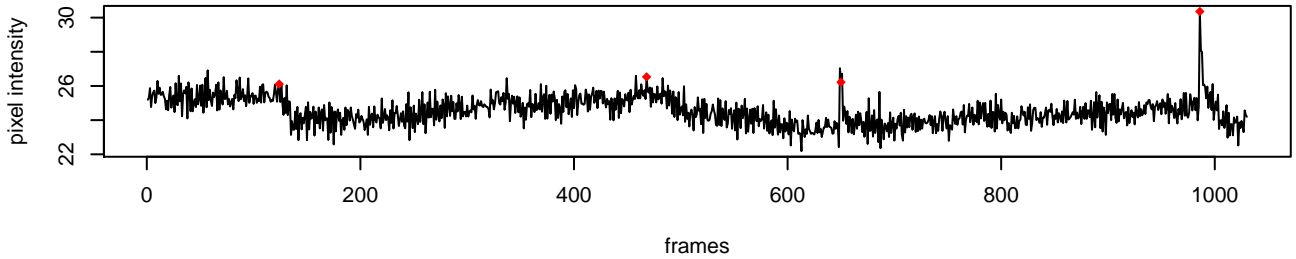

**Graph 11 , 14    Total Activity 3    Position in Array 847**

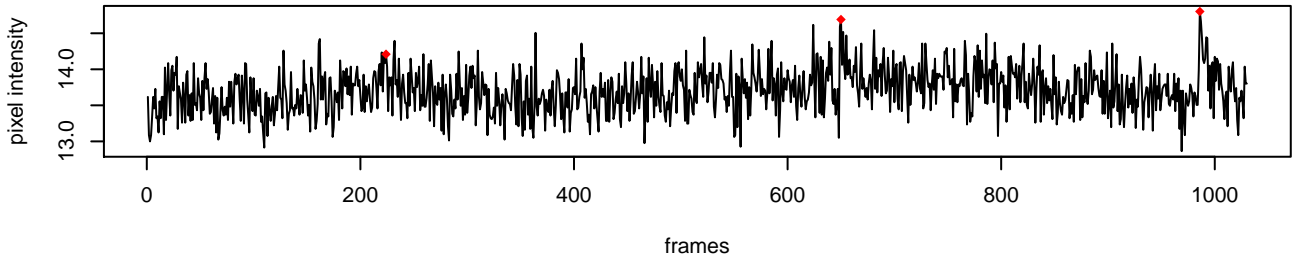



**Graph 16 , 14    Total Activity 6    Position in Array 852**

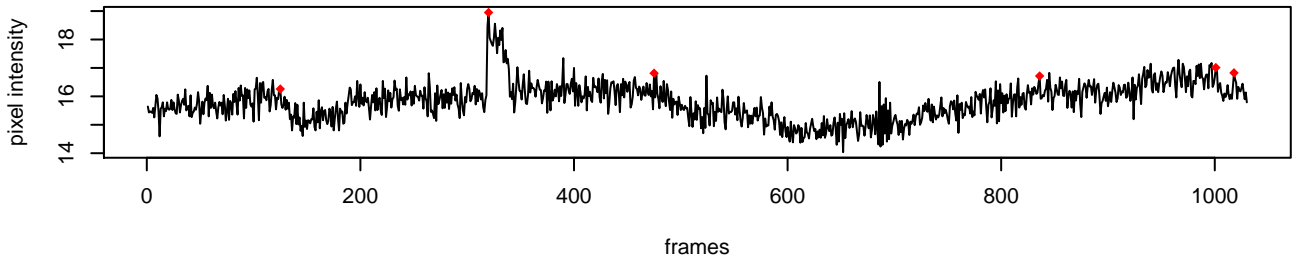

**Graph 17 , 14    Total Activity 5    Position in Array 853**

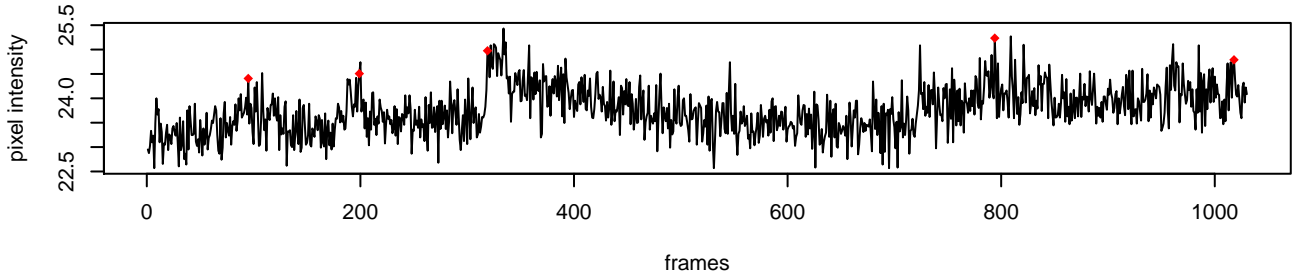

**Graph 18 , 14    Total Activity 2    Position in Array 854**

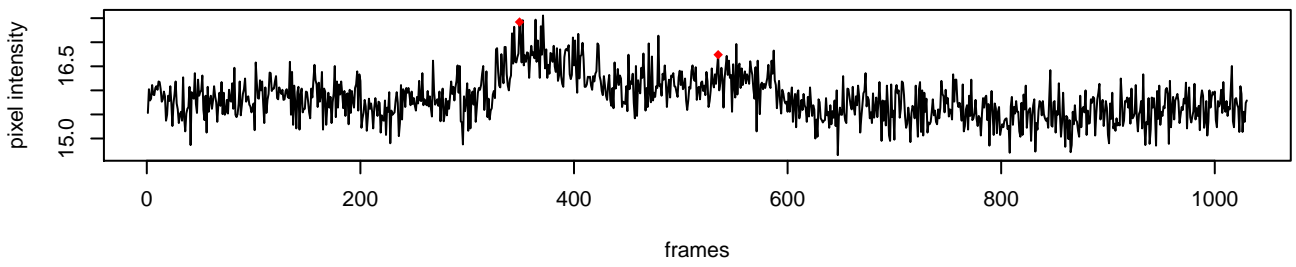

**Graph 19 , 14    Total Activity 3    Position in Array 855**

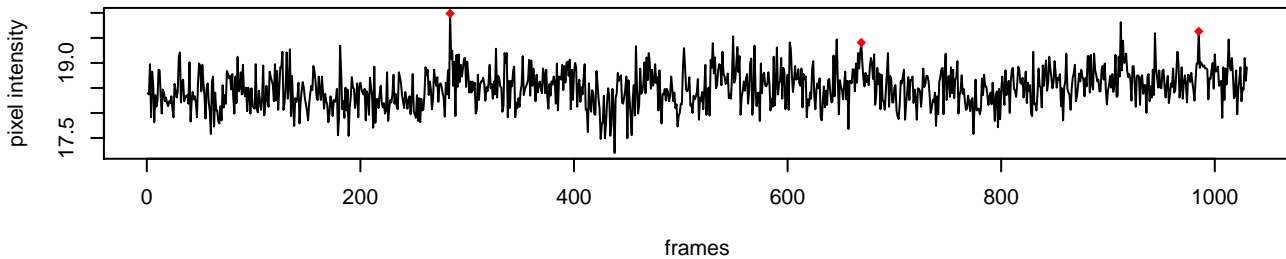

**Graph 22 , 14    Total Activity 2    Position in Array 858**

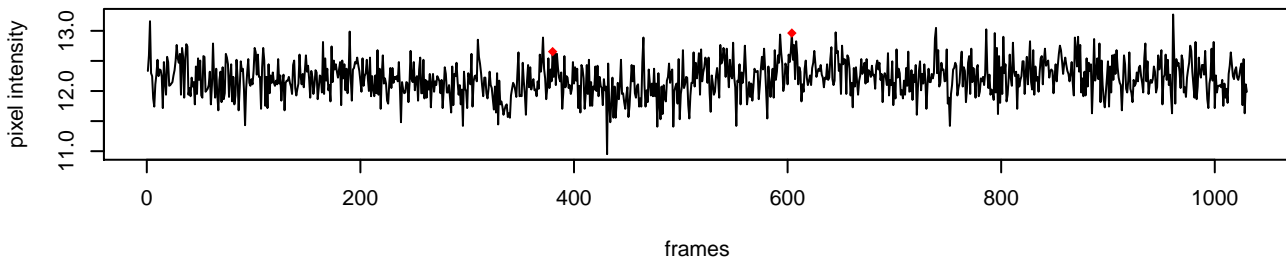

**Graph 25 , 14    Total Activity 4    Position in Array 861**

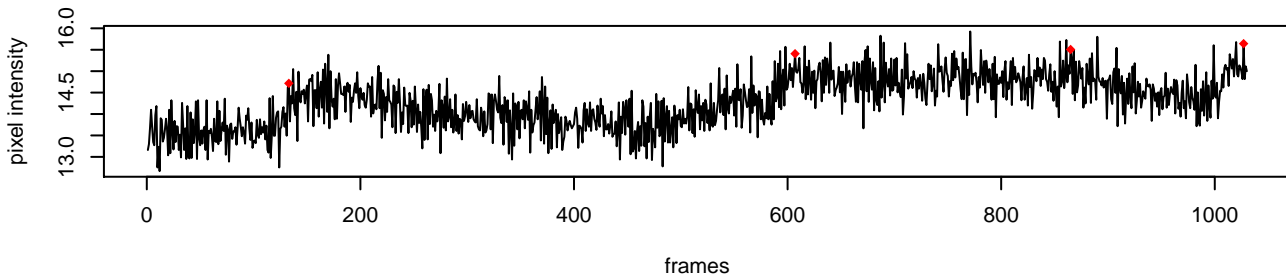

**Graph 26 , 14    Total Activity 4    Position in Array 862**

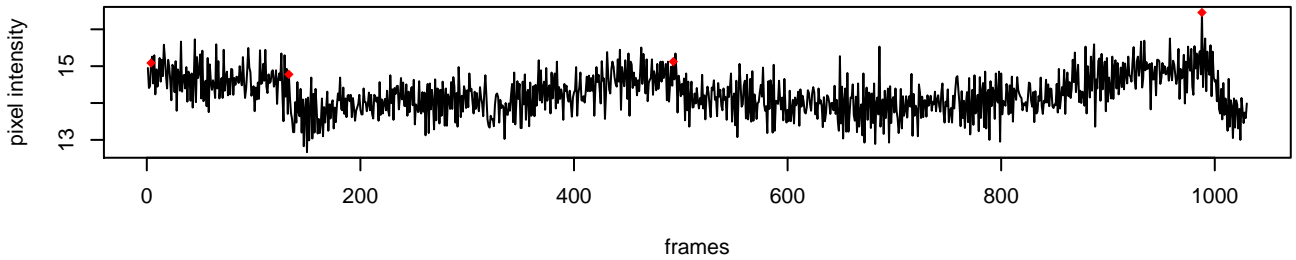

**Graph 27 , 14    Total Activity 4    Position in Array 863**

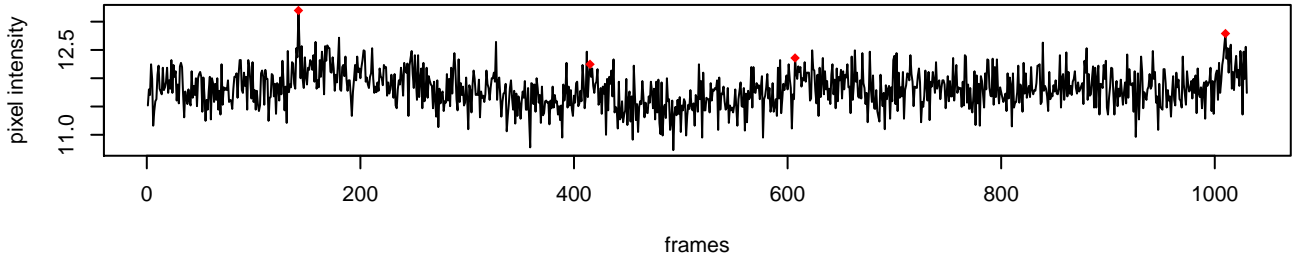

**Graph 29 , 14    Total Activity 2    Position in Array 865**

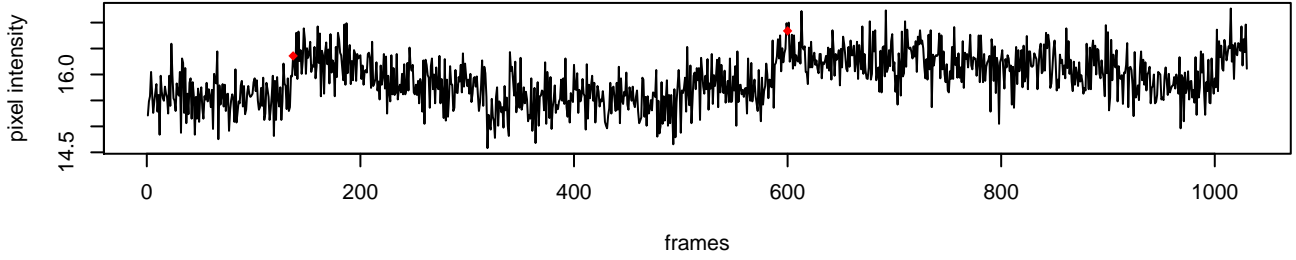

**Graph 30 , 14    Total Activity 5    Position in Array 866**

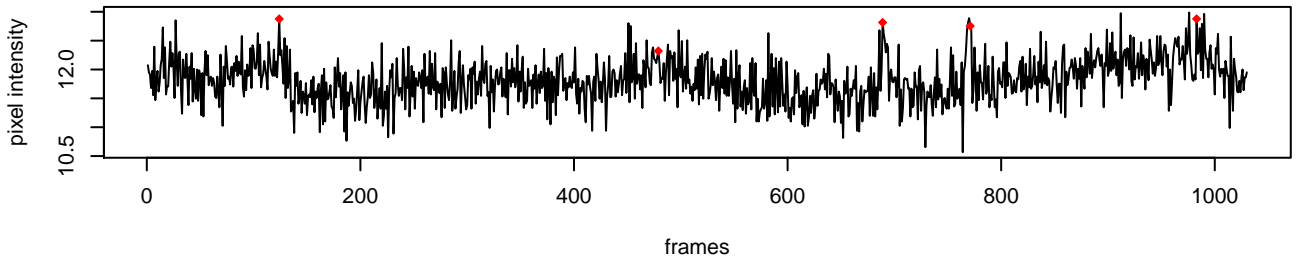

**Graph 36 , 14    Total Activity 2    Position in Array 872**

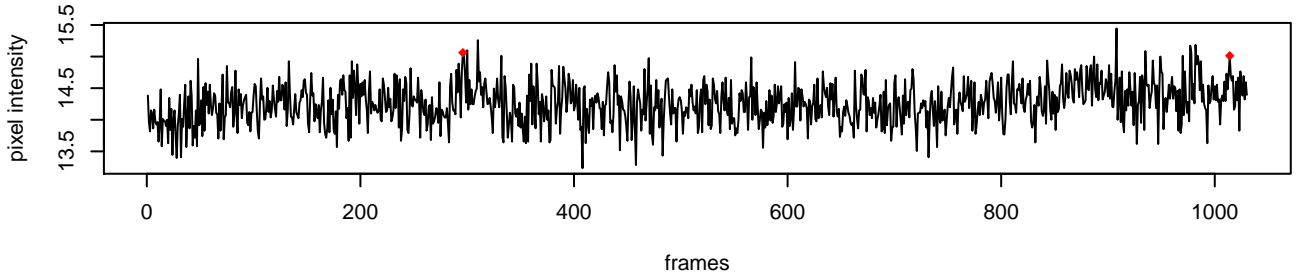

**Graph 37 , 14    Total Activity 2    Position in Array 873**

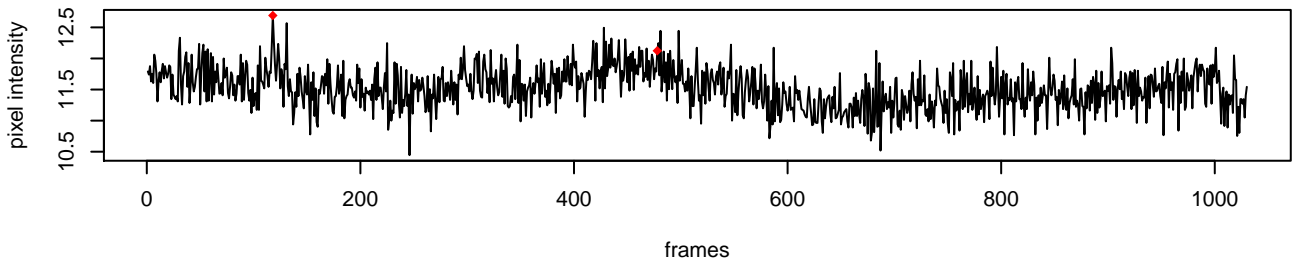

**Graph 39 , 14    Total Activity 3    Position in Array 875**

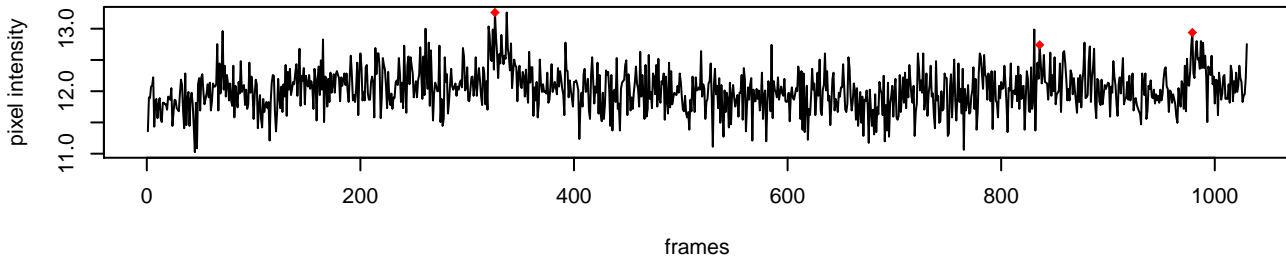

**Graph 40 , 14    Total Activity 3    Position in Array 876**

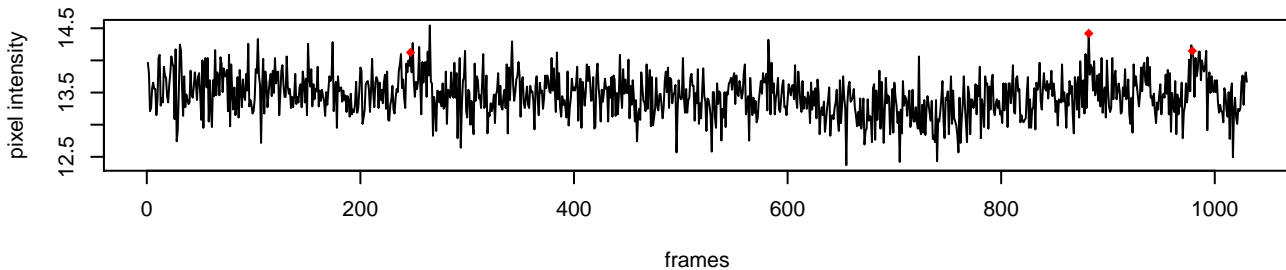

**Graph 41 , 14    Total Activity 4    Position in Array 877**

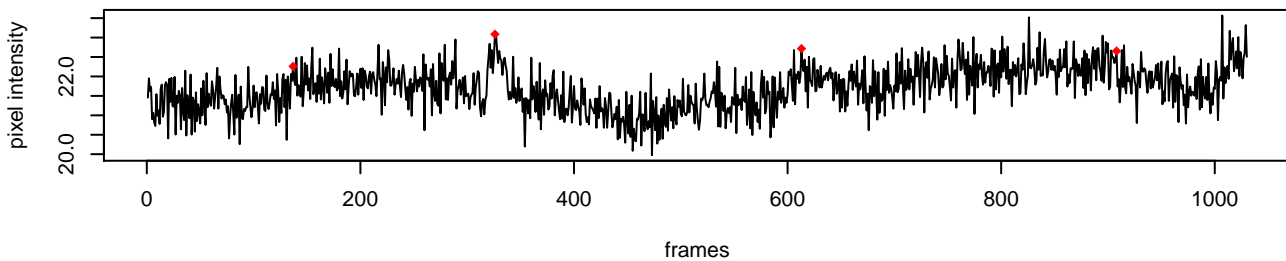

**Graph 42 , 14    Total Activity 4    Position in Array 878**

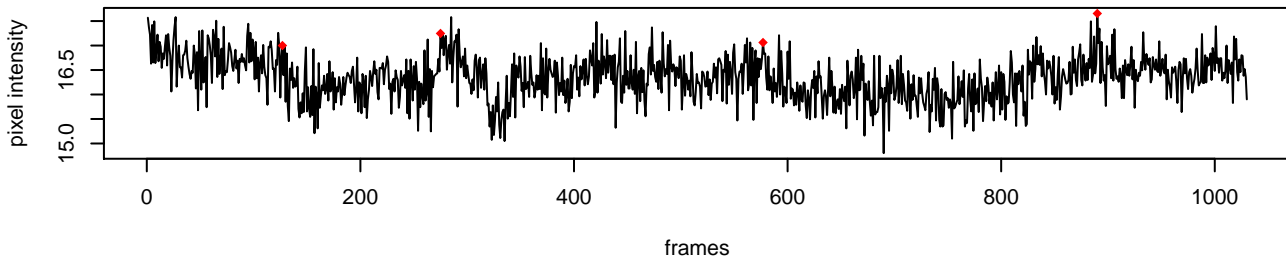

**Graph 1 , 13    Total Activity 23    Position in Array 881**

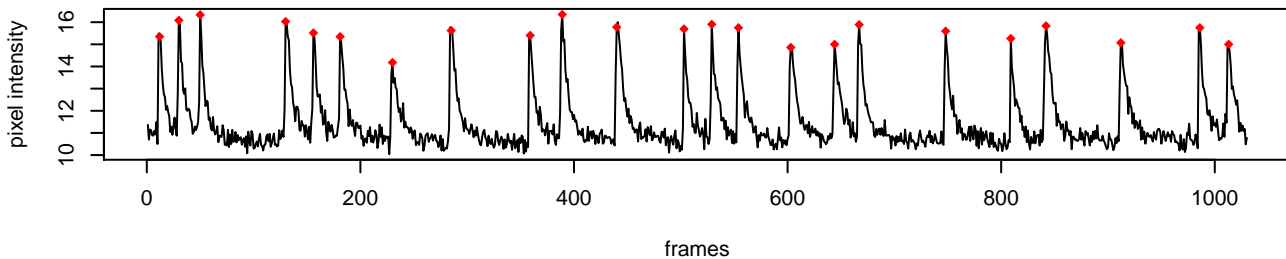

**Graph 3 , 13    Total Activity 4    Position in Array 883**

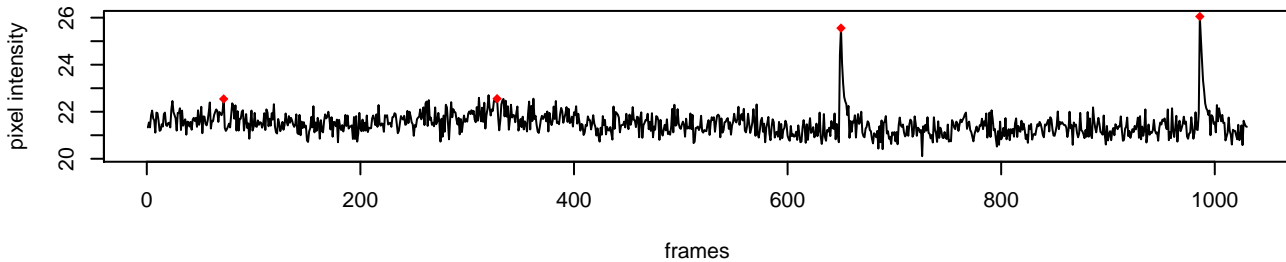

**Graph 4 , 13    Total Activity 5    Position in Array 884**

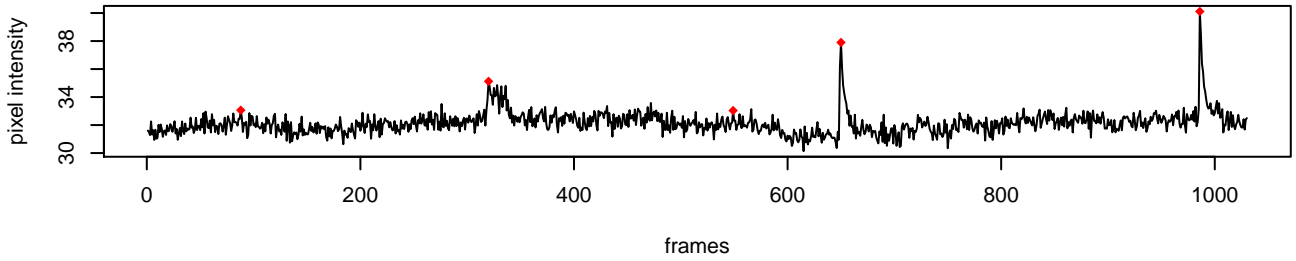

**Graph 5 , 13    Total Activity 6    Position in Array 885**

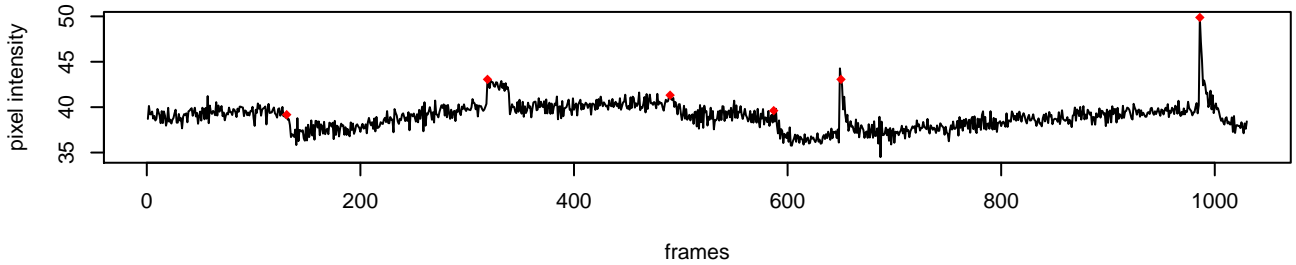

**Graph 6 , 13    Total Activity 6    Position in Array 886**

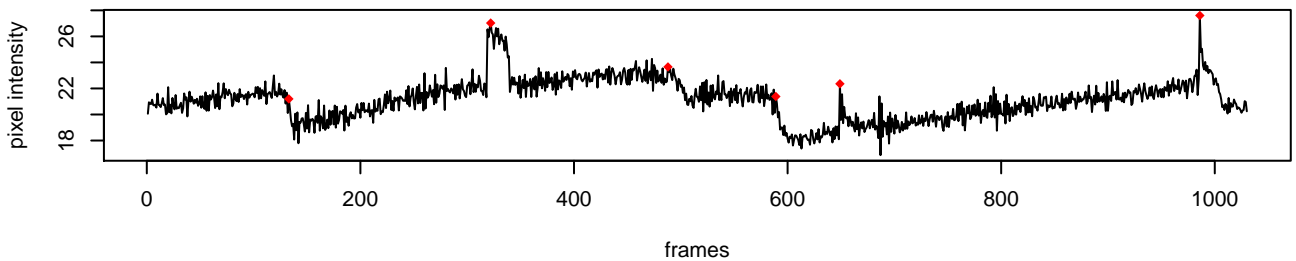

**Graph 8 , 13    Total Activity 3    Position in Array 888**

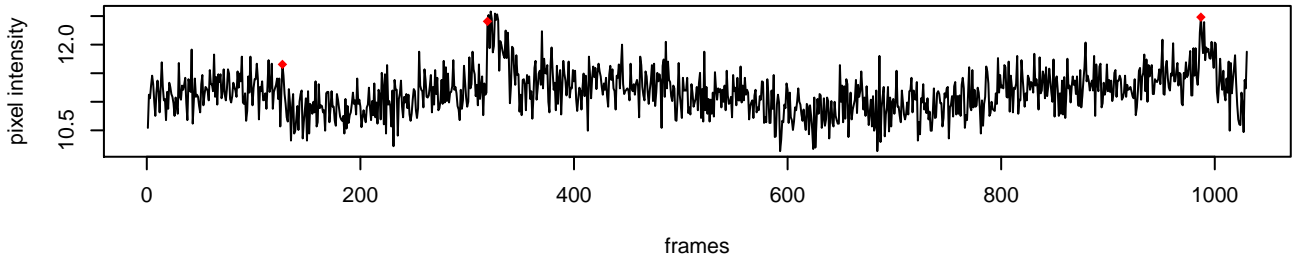

**Graph 12 , 13    Total Activity 2    Position in Array 892**

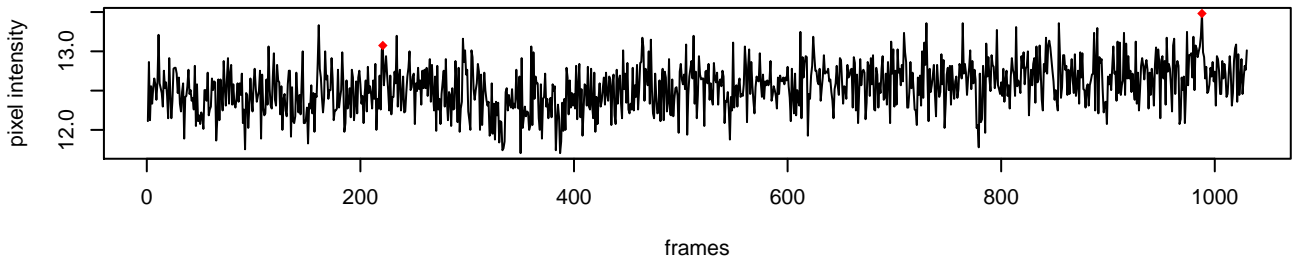

**Graph 17 , 13    Total Activity 3    Position in Array 897**

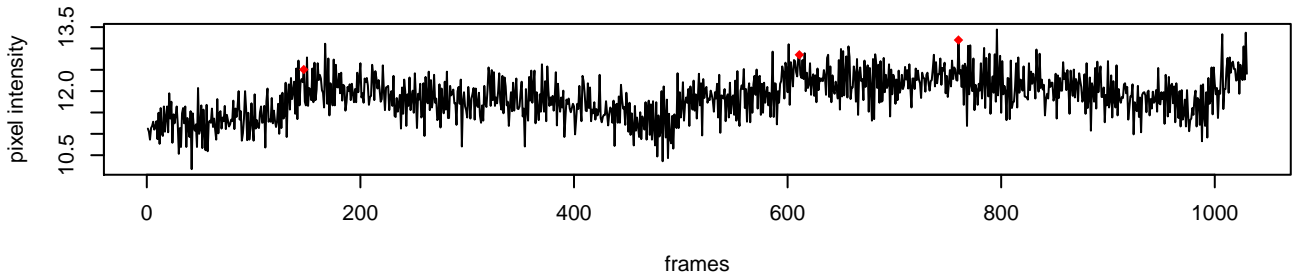



**Graph 18 , 13    Total Activity 20    Position in Array 898**

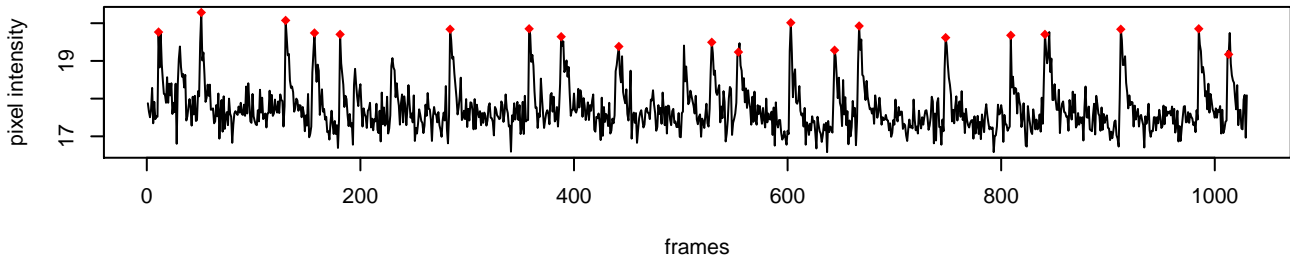

**Graph 19 , 13    Total Activity 21    Position in Array 899**

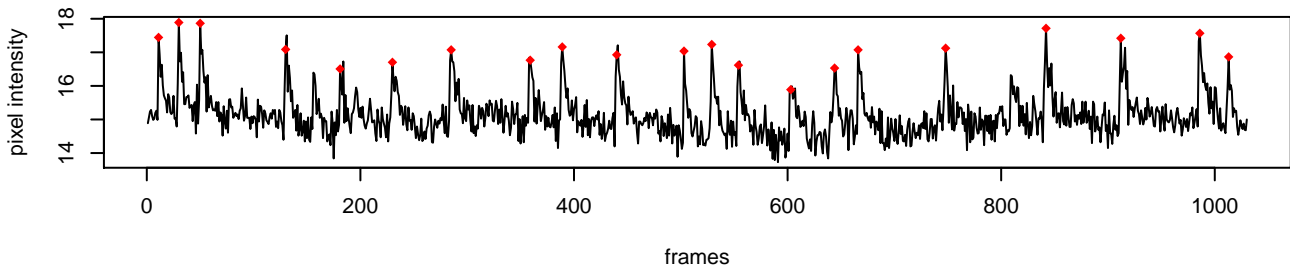

**Graph 20 , 13    Total Activity 3    Position in Array 900**

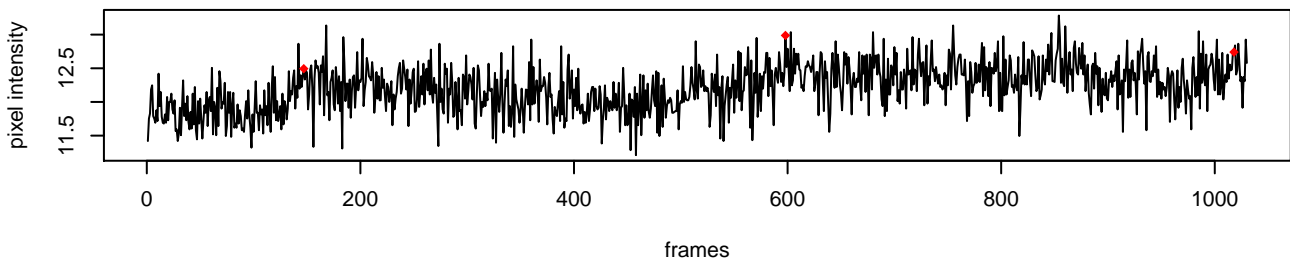

**Graph 21 , 13    Total Activity 2    Position in Array 901**

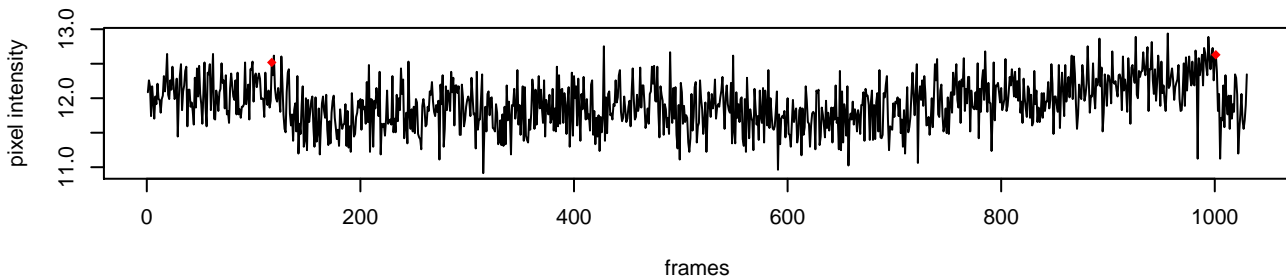

**Graph 22 , 13    Total Activity 3    Position in Array 902**

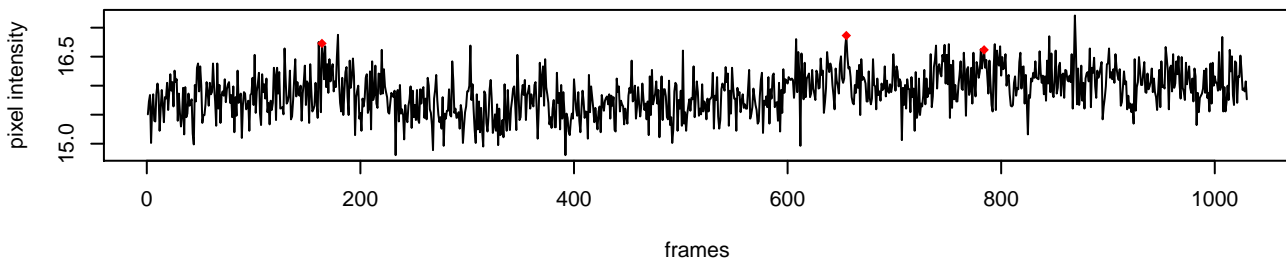

**Graph 25 , 13    Total Activity 4    Position in Array 905**

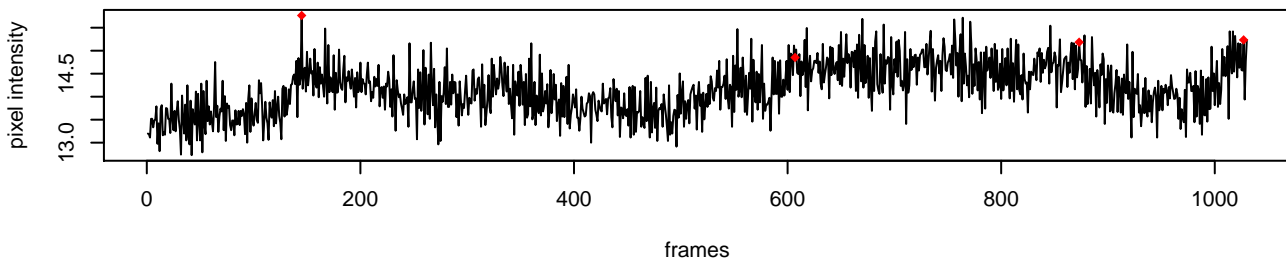

**Graph 26 , 13    Total Activity 2    Position in Array 906**

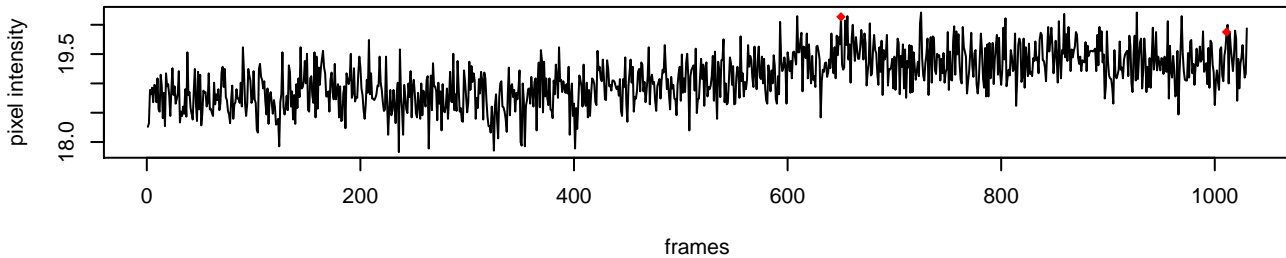

**Graph 27 , 13    Total Activity 3    Position in Array 907**

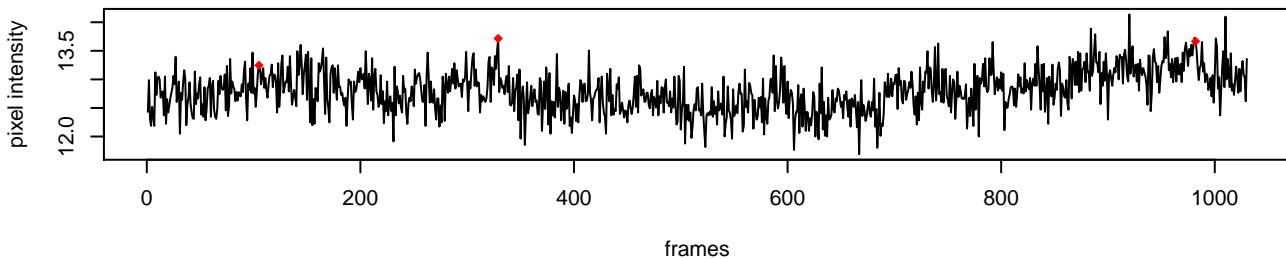

**Graph 29 , 13    Total Activity 4    Position in Array 909**

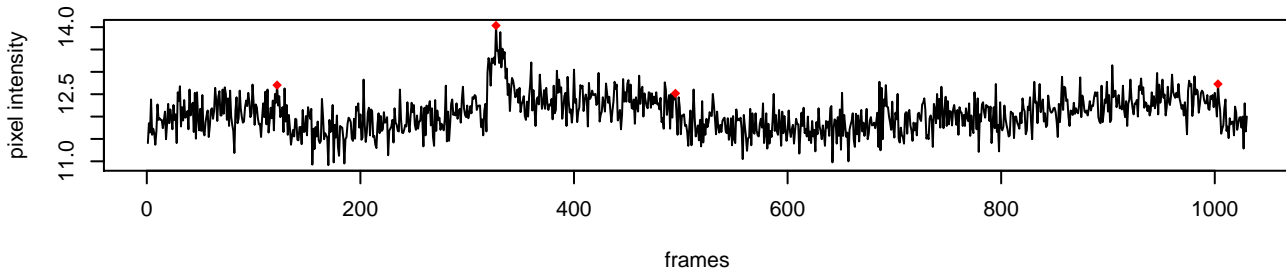

**Graph 31 , 13    Total Activity 2    Position in Array 911**

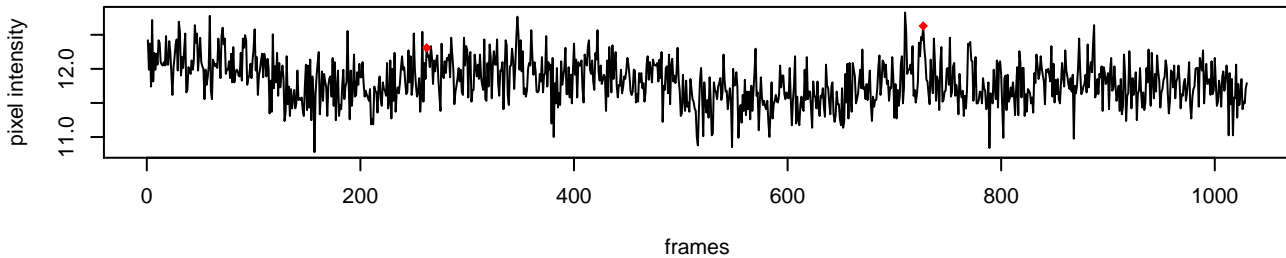

**Graph 34 , 13    Total Activity 4    Position in Array 914**

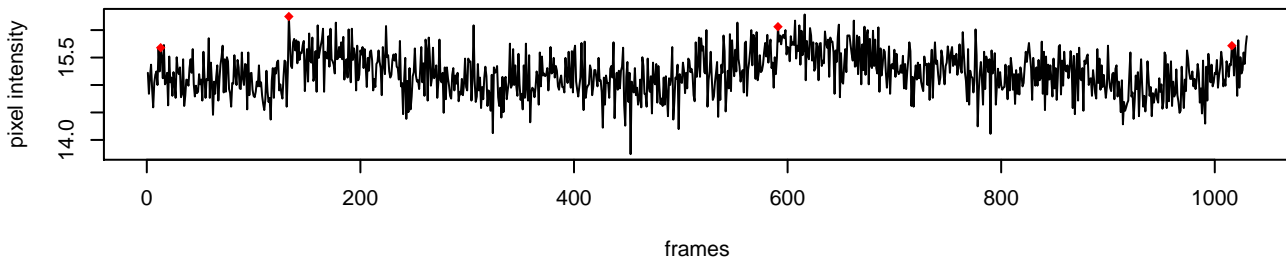

**Graph 35 , 13    Total Activity 3    Position in Array 915**

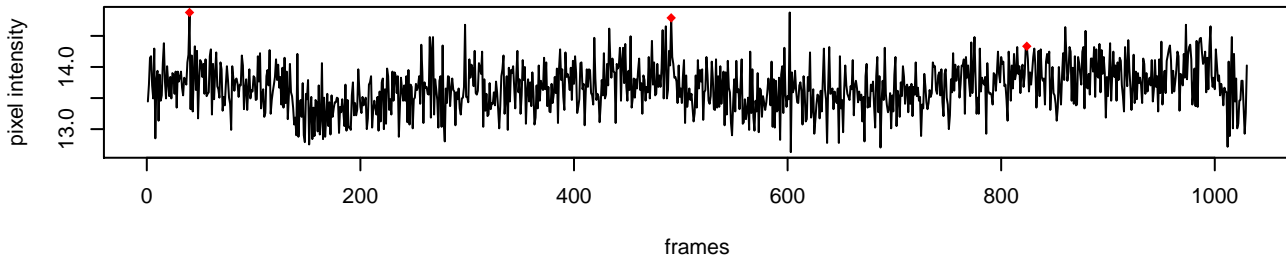

**Graph 40 , 13    Total Activity 3    Position in Array 920**

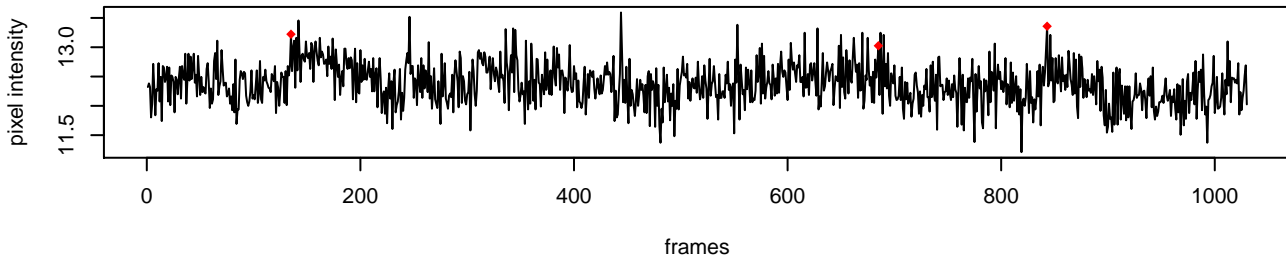

**Graph 41 , 13    Total Activity 4    Position in Array 921**

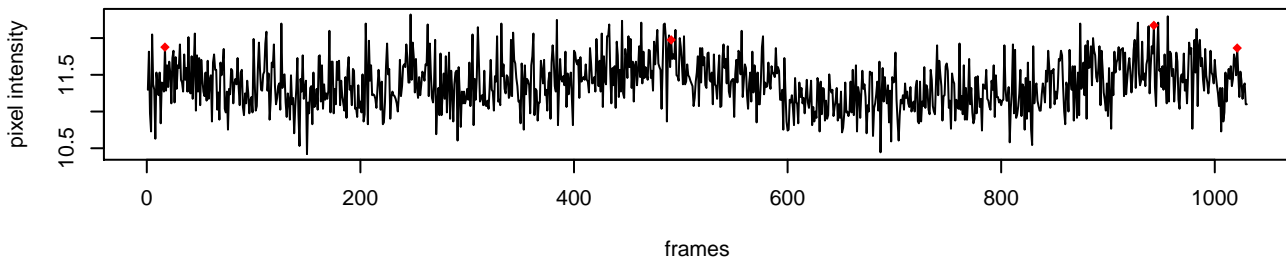

**Graph 42 , 13    Total Activity 4    Position in Array 922**

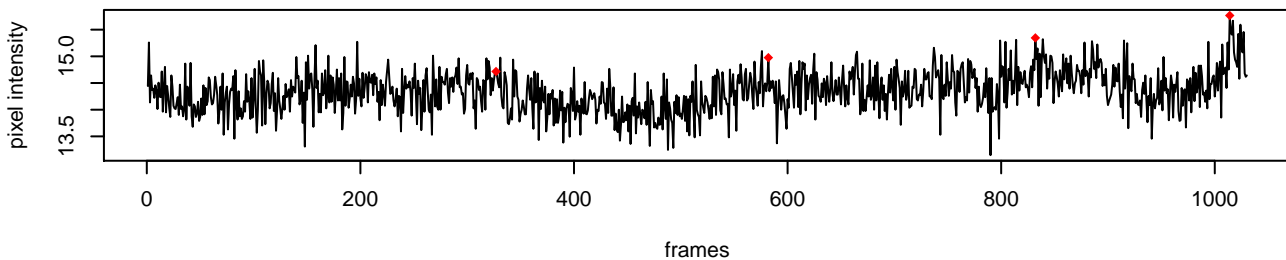

**Graph 2 , 12    Total Activity 4    Position in Array 926**

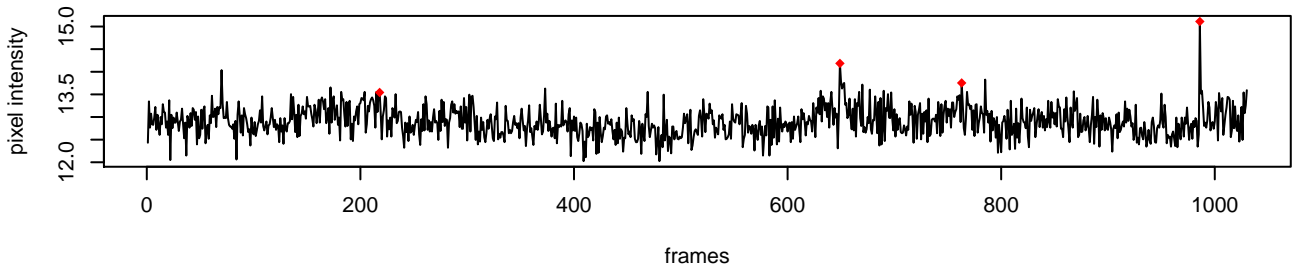

**Graph 10 , 12    Total Activity 4    Position in Array 934**

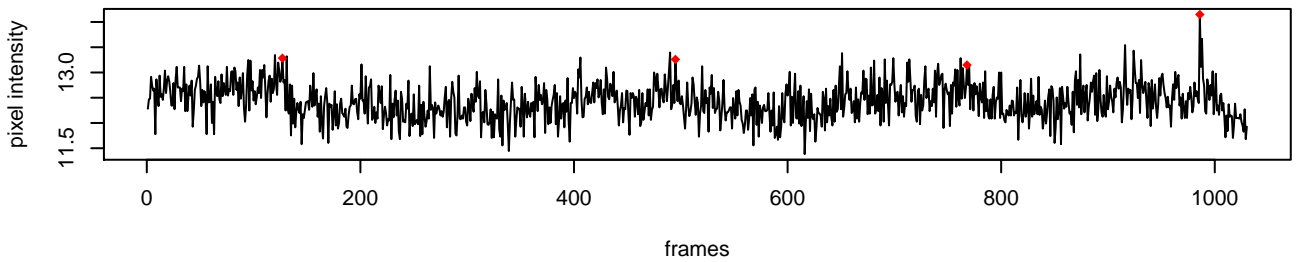

**Graph 12 , 12    Total Activity 3    Position in Array 936**

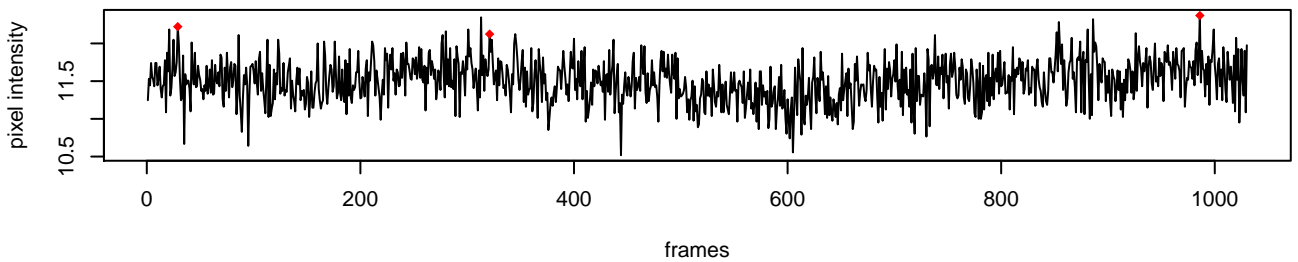

**Graph 17 , 12    Total Activity 3    Position in Array 941**

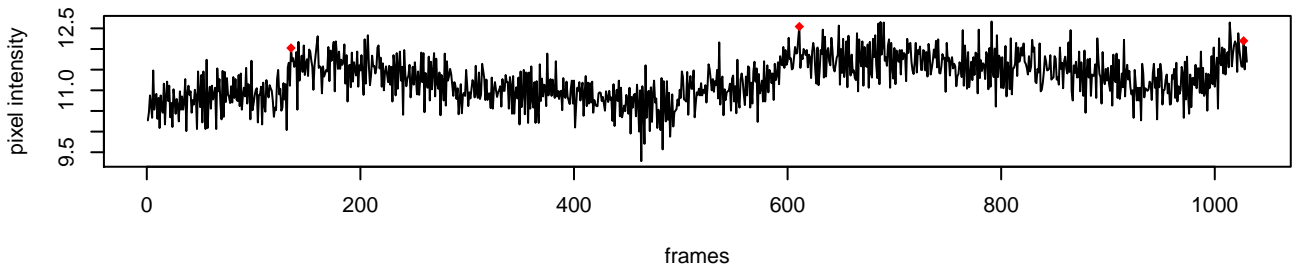

**Graph 18 , 12    Total Activity 4    Position in Array 942**

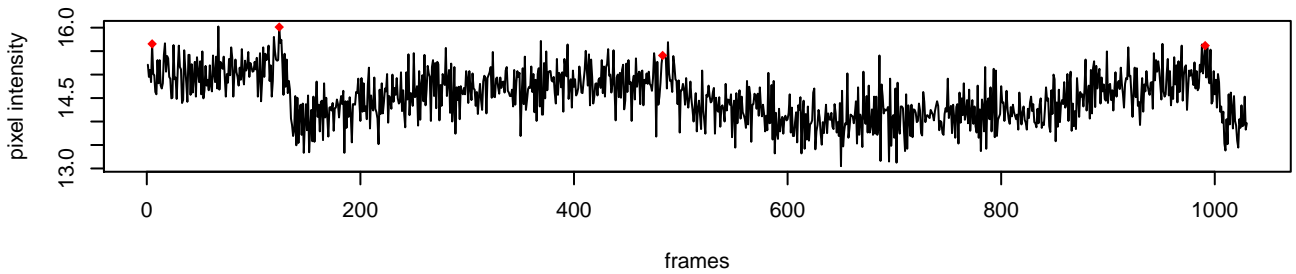

**Graph 20 , 12    Total Activity 4    Position in Array 944**

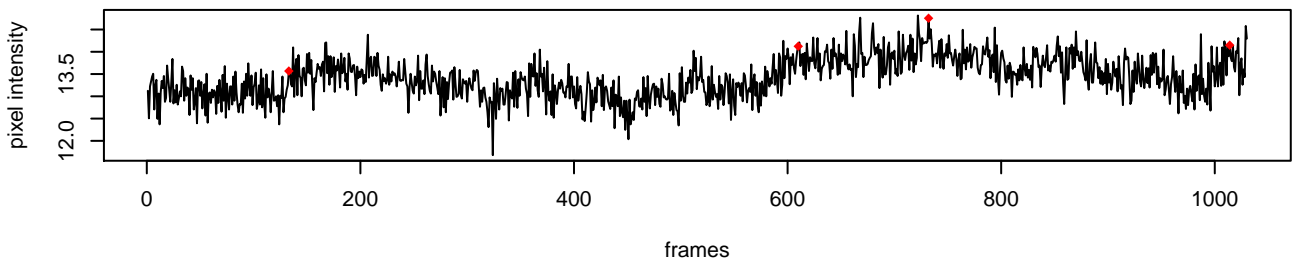

**Graph 22 , 12    Total Activity 2    Position in Array 946**

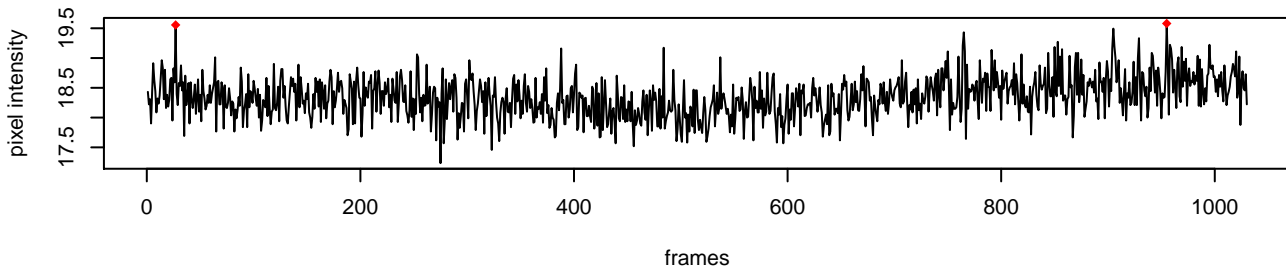

**Graph 26 , 12    Total Activity 3    Position in Array 950**

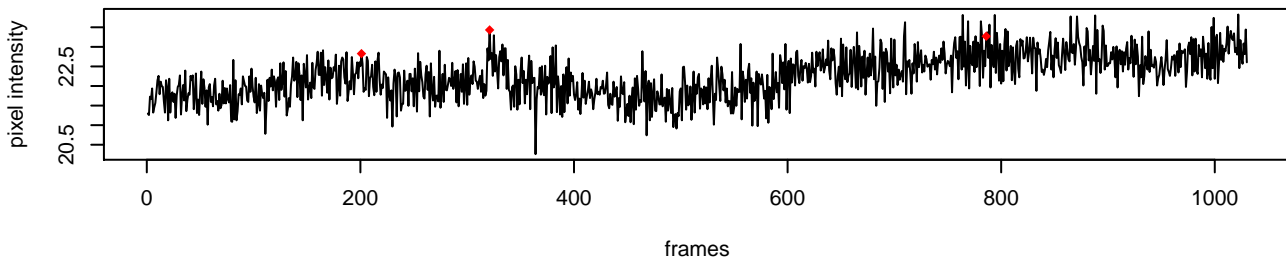

**Graph 27 , 12    Total Activity 3    Position in Array 951**

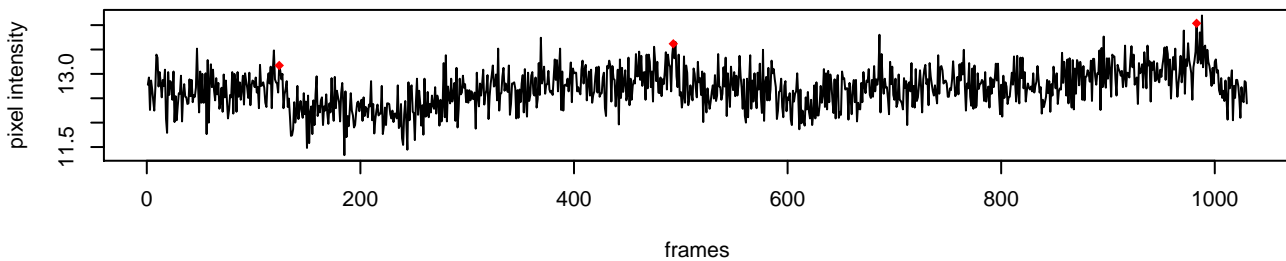



**Graph 28 , 12    Total Activity 6    Position in Array 952**

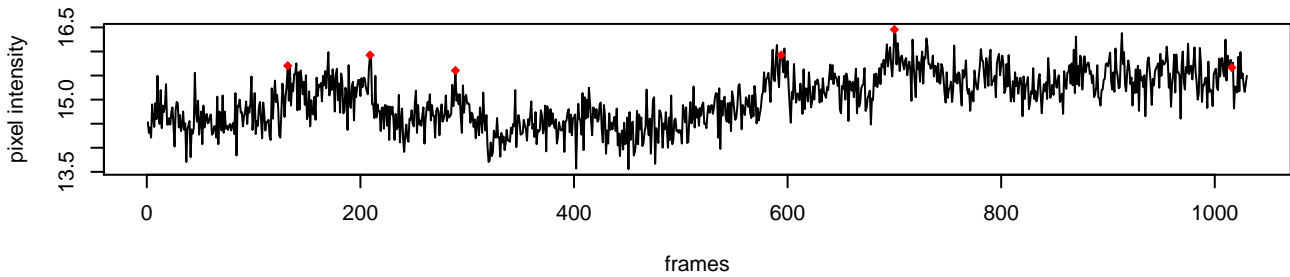

**Graph 33 , 12    Total Activity 2    Position in Array 957**

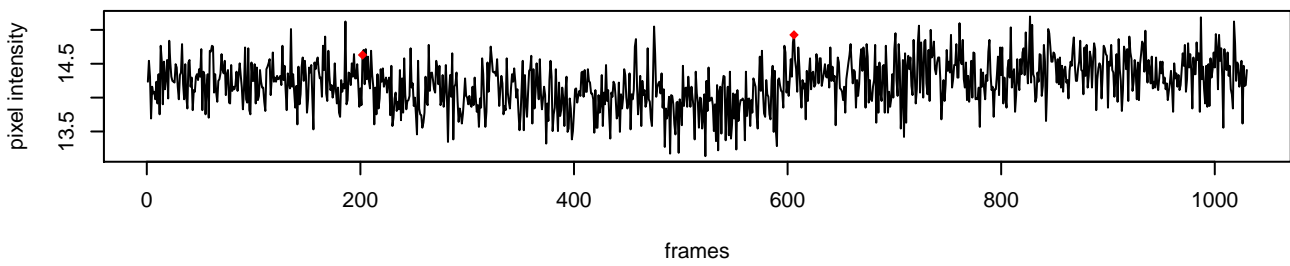

**Graph 34 , 12    Total Activity 3    Position in Array 958**

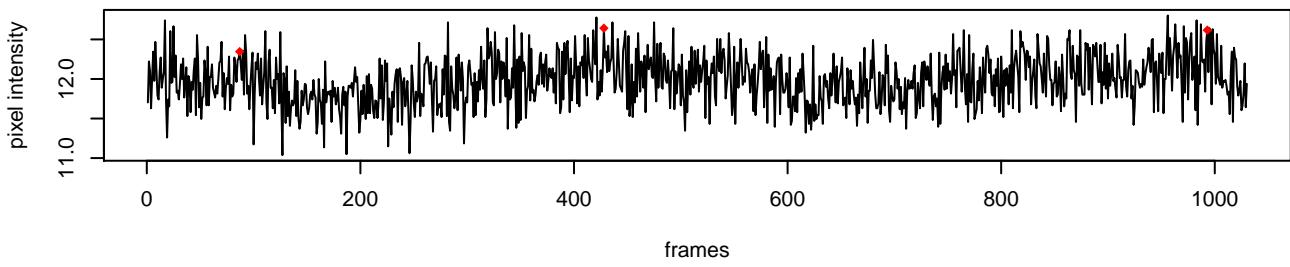

**Graph 36 , 12    Total Activity 6    Position in Array 960**

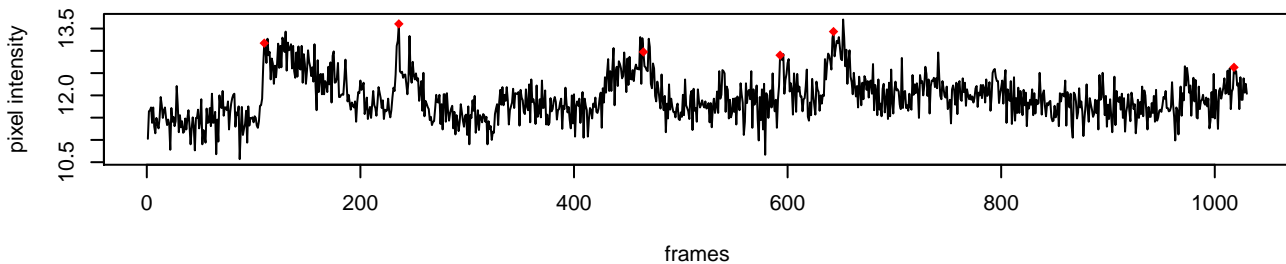

**Graph 37 , 12    Total Activity 9    Position in Array 961**

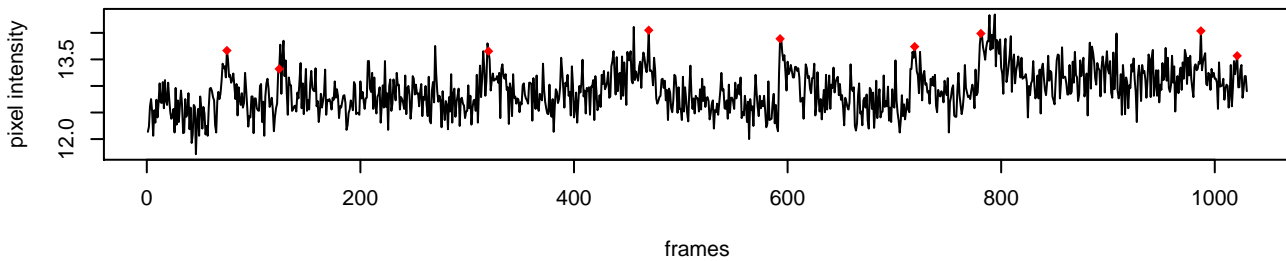

**Graph 42 , 12    Total Activity 3    Position in Array 966**

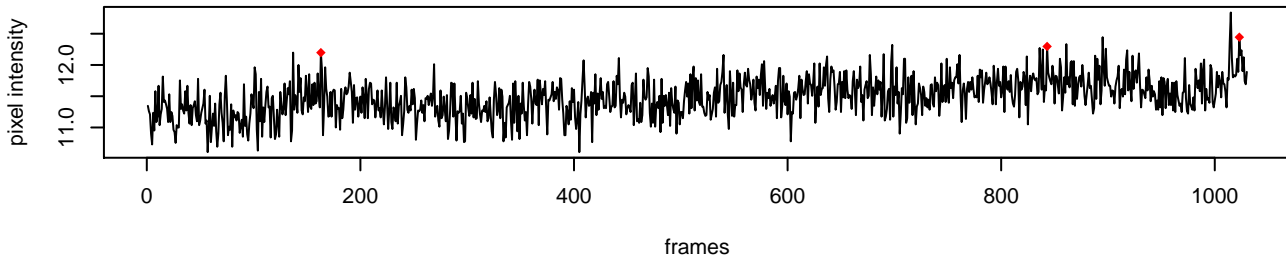

**Graph 43 , 12    Total Activity 3    Position in Array 967**

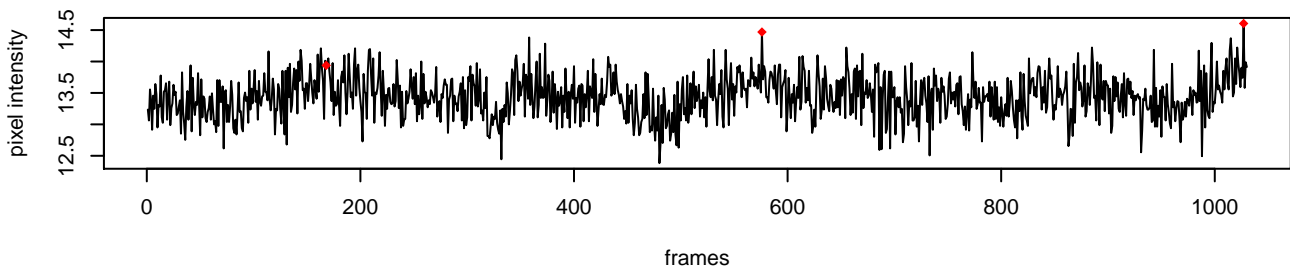

**Graph 12 , 11    Total Activity 3    Position in Array 980**

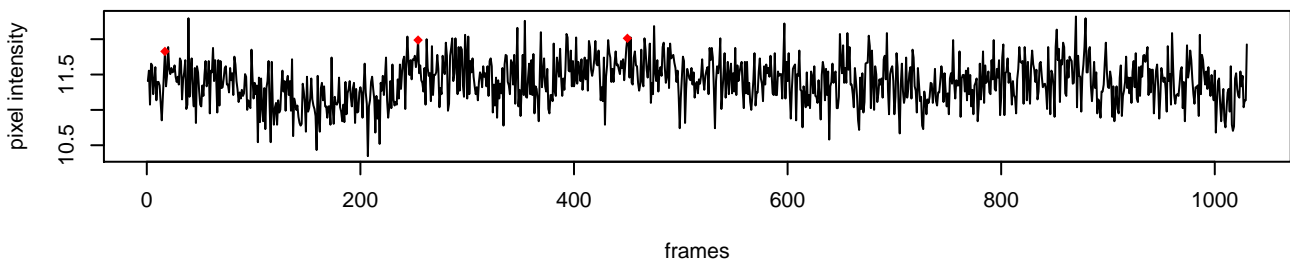

**Graph 17 , 11    Total Activity 4    Position in Array 985**

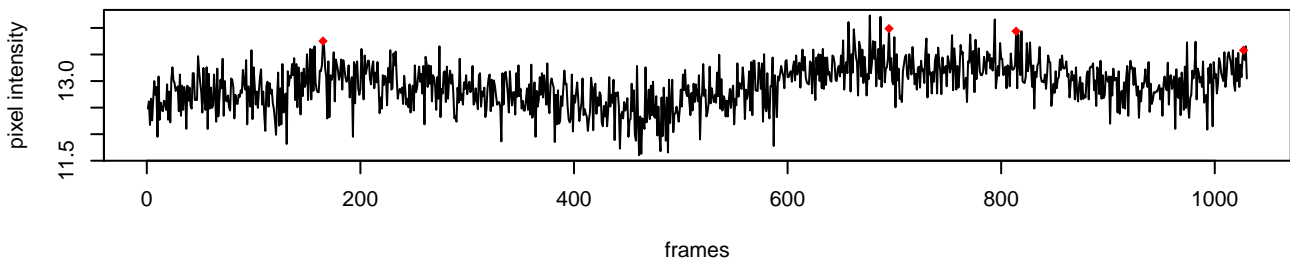

**Graph 20 , 11    Total Activity 4    Position in Array 988**

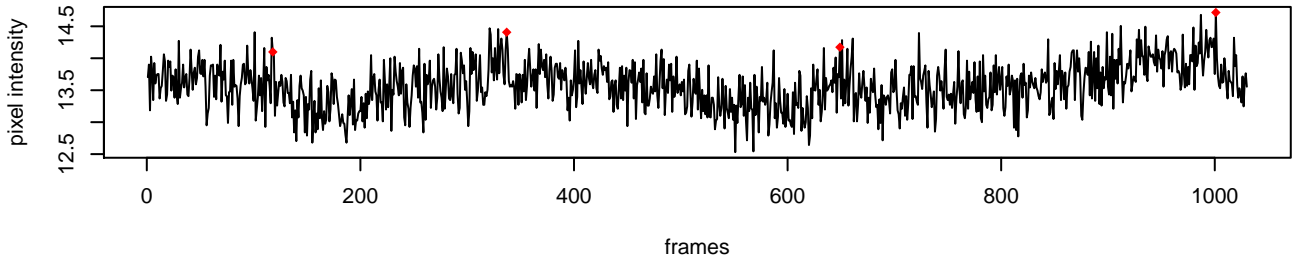

**Graph 21 , 11    Total Activity 2    Position in Array 989**

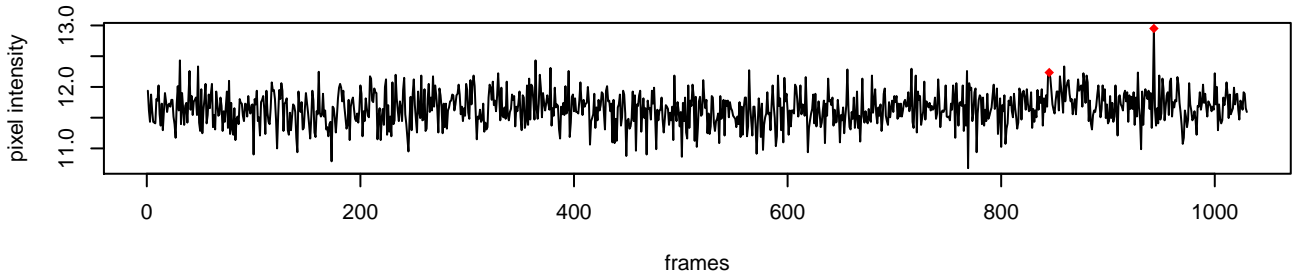

**Graph 22 , 11    Total Activity 3    Position in Array 990**

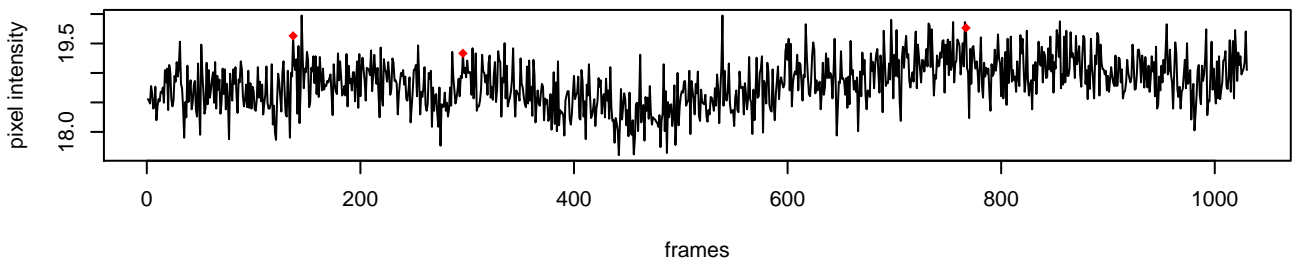

**Graph 28 , 11    Total Activity 4    Position in Array 996**

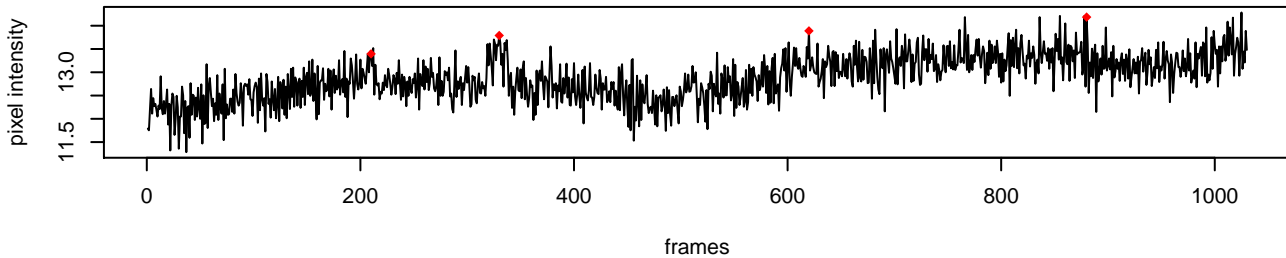

**Graph 29 , 11    Total Activity 9    Position in Array 997**

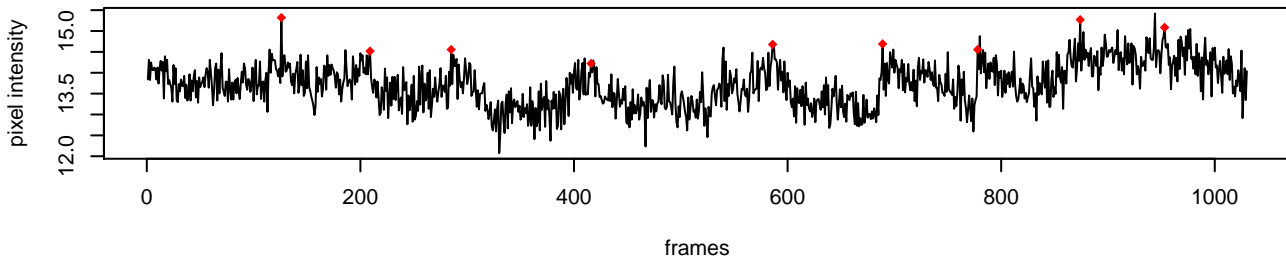

**Graph 30 , 11    Total Activity 3    Position in Array 998**

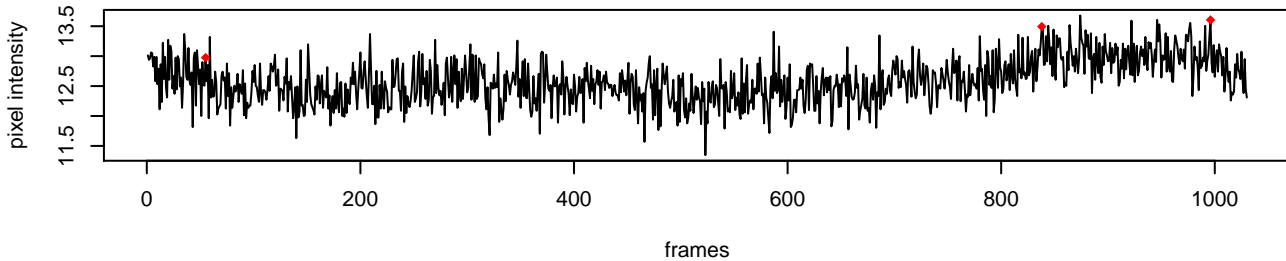

**Graph 34 , 11    Total Activity 3    Position in Array 1002**

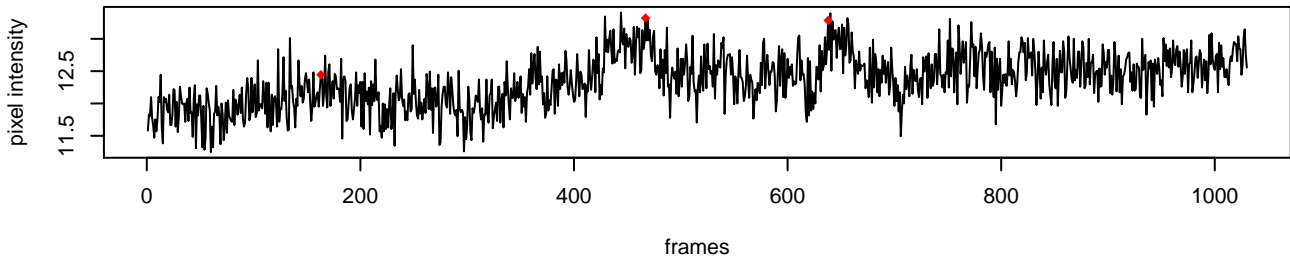

**Graph 35 , 11    Total Activity 6    Position in Array 1003**

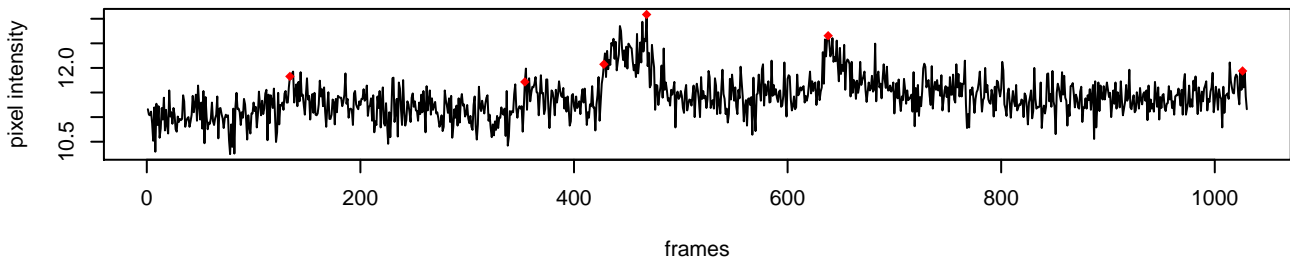

**Graph 36 , 11    Total Activity 4    Position in Array 1004**

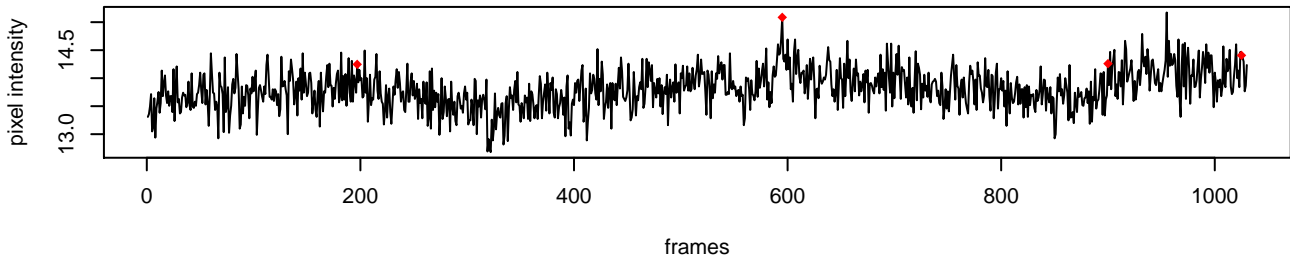

**Graph 40 , 11    Total Activity 6    Position in Array 1008**

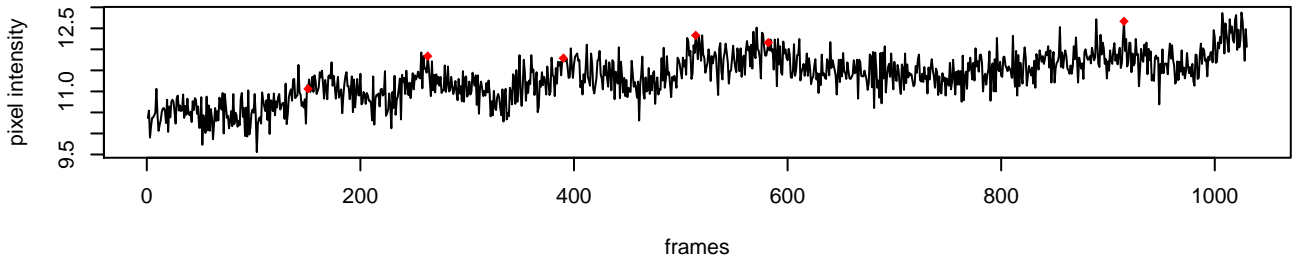

**Graph 1 , 10    Total Activity 3    Position in Array 1013**

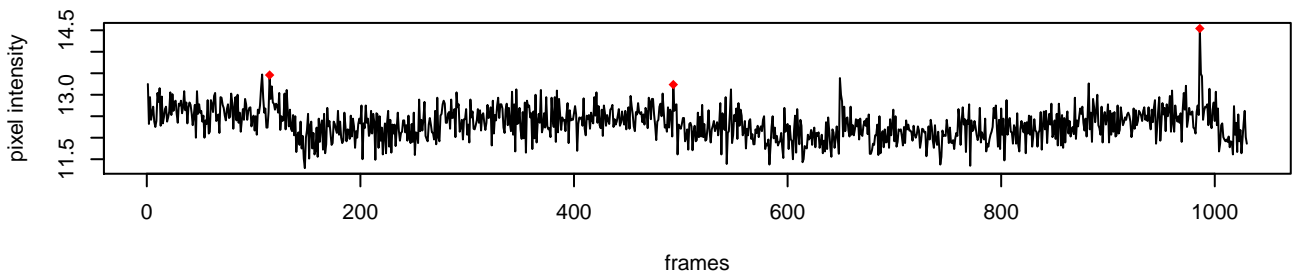

**Graph 13 , 10    Total Activity 2    Position in Array 1025**

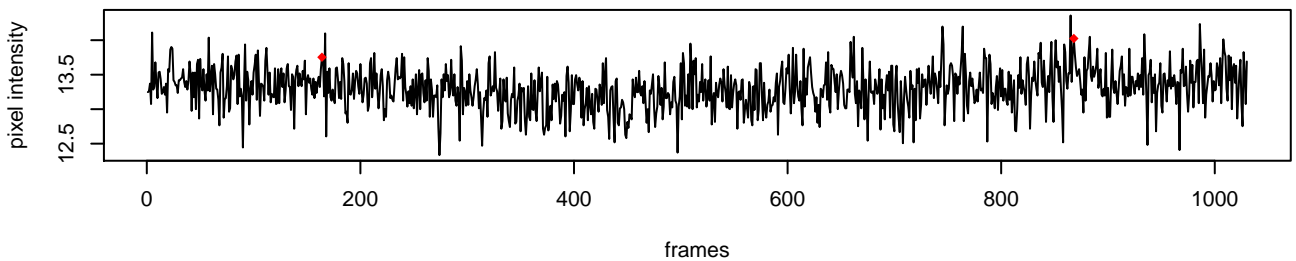

**Graph 17 , 10    Total Activity 2    Position in Array 1029**

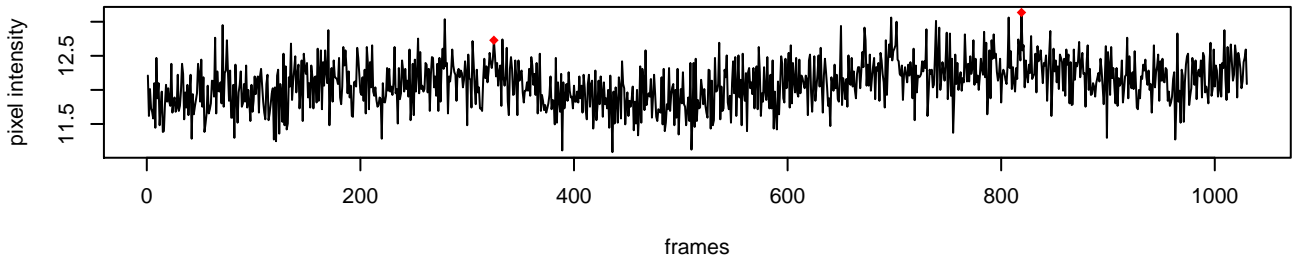

**Graph 18 , 10    Total Activity 2    Position in Array 1030**

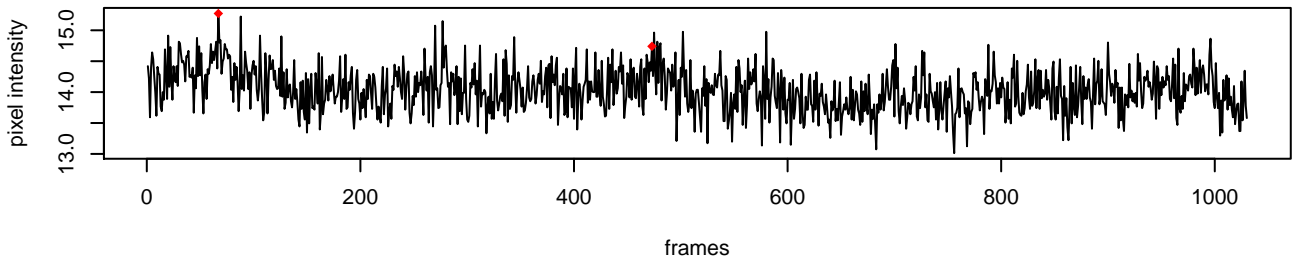

**Graph 22 , 10    Total Activity 5    Position in Array 1034**

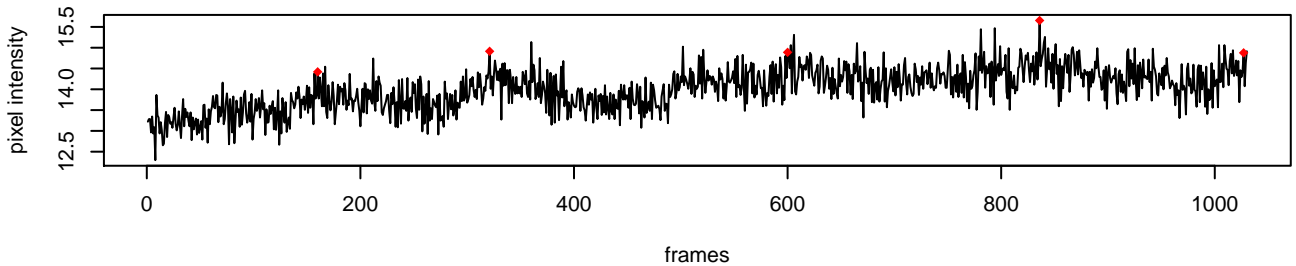



**Graph 23 , 10    Total Activity 4    Position in Array 1035**

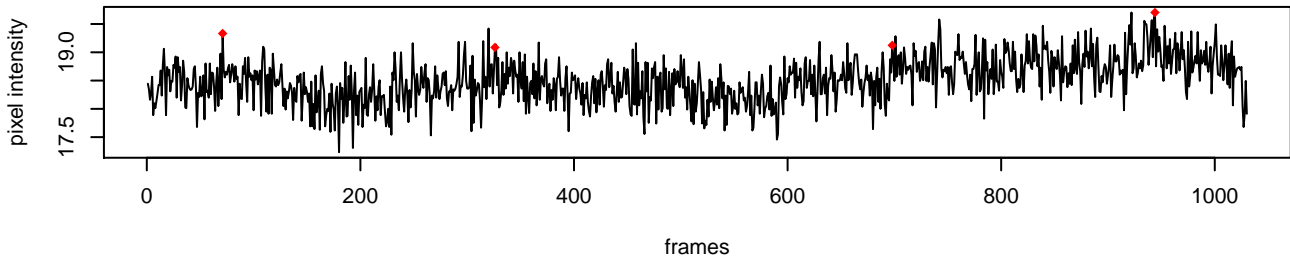

**Graph 27 , 10    Total Activity 3    Position in Array 1039**

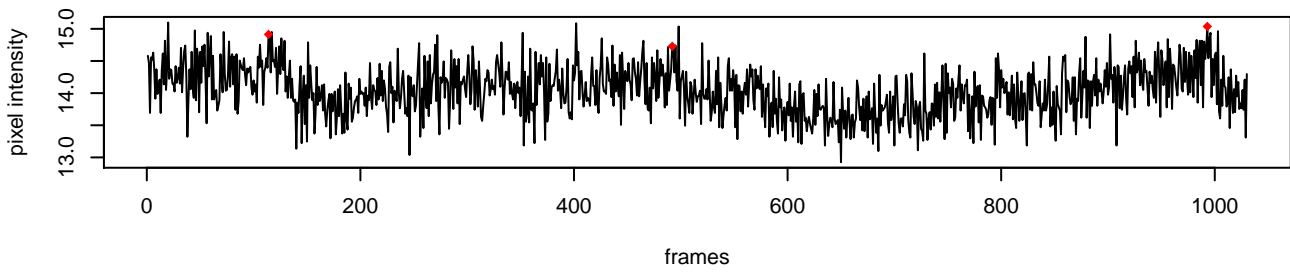

**Graph 28 , 10    Total Activity 4    Position in Array 1040**

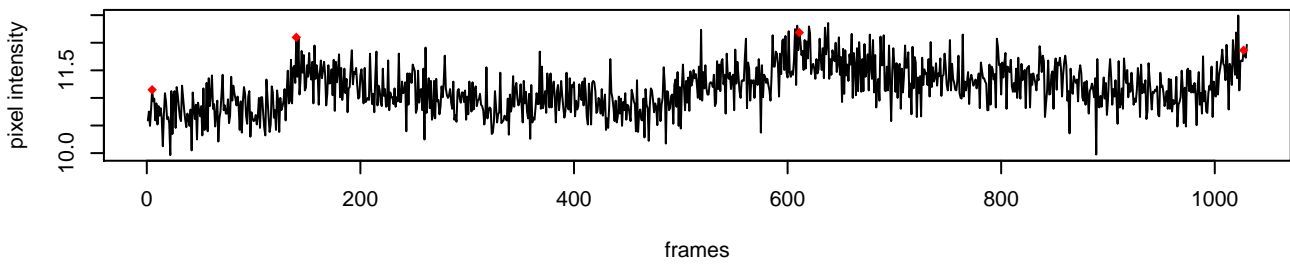

**Graph 29 , 10    Total Activity 3    Position in Array 1041**

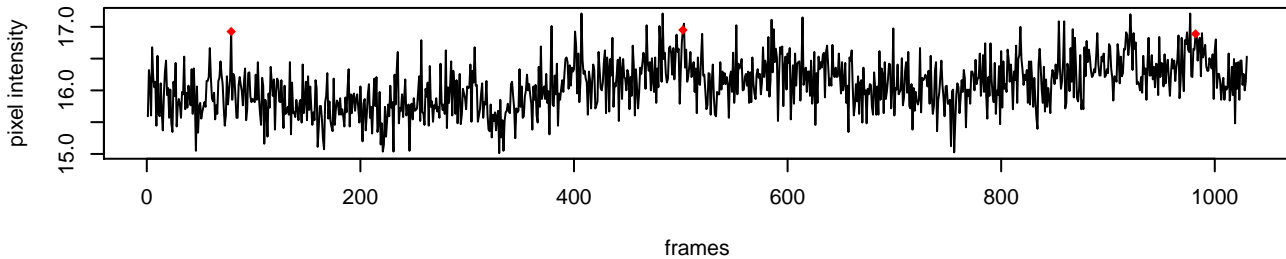

**Graph 30 , 10    Total Activity 6    Position in Array 1042**

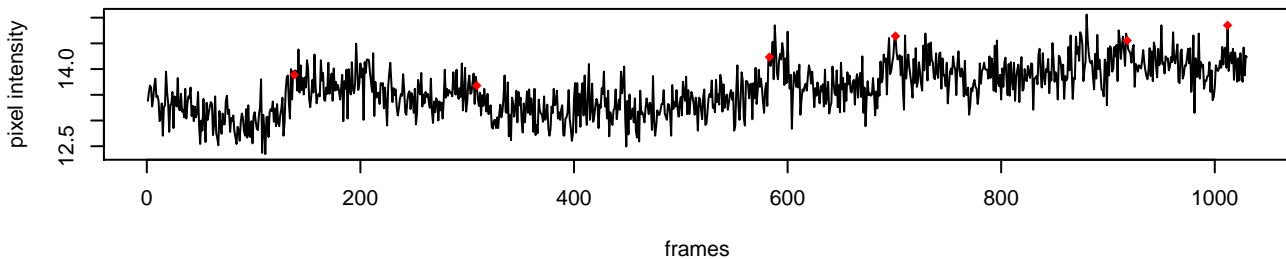

**Graph 34 , 10    Total Activity 2    Position in Array 1046**

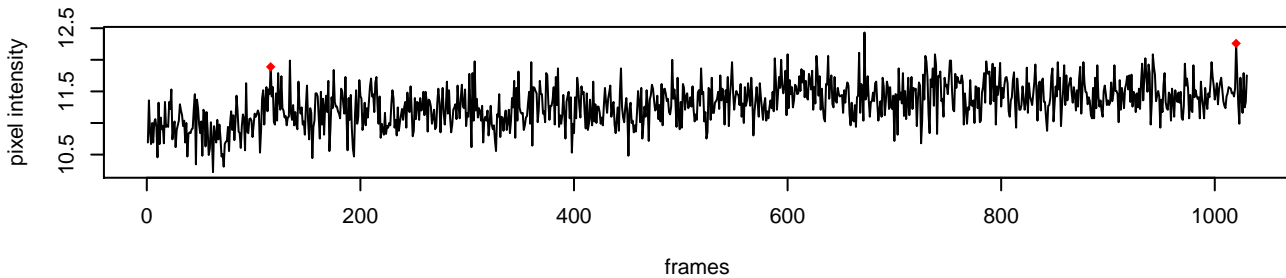

**Graph 35 , 10    Total Activity 2    Position in Array 1047**

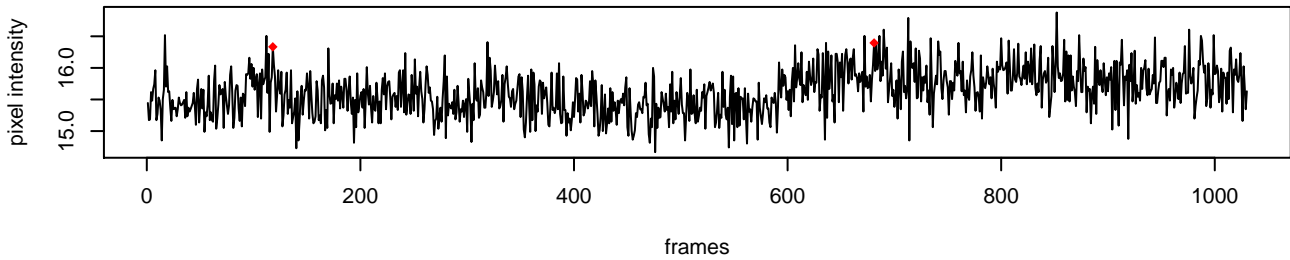

**Graph 36 , 10    Total Activity 4    Position in Array 1048**

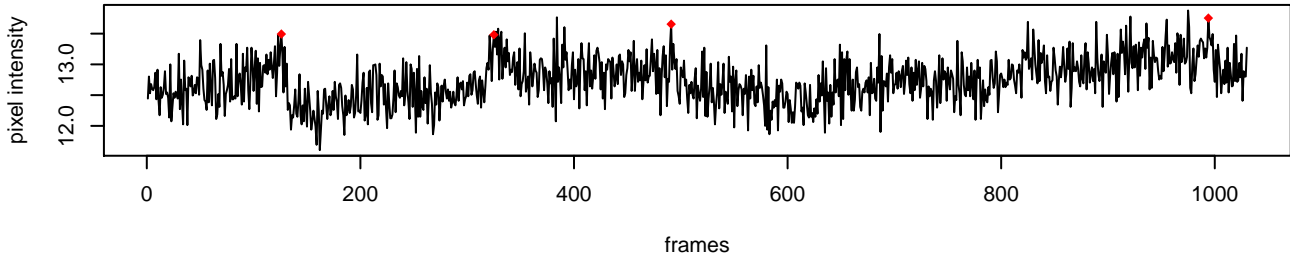

**Graph 38 , 10    Total Activity 9    Position in Array 1050**

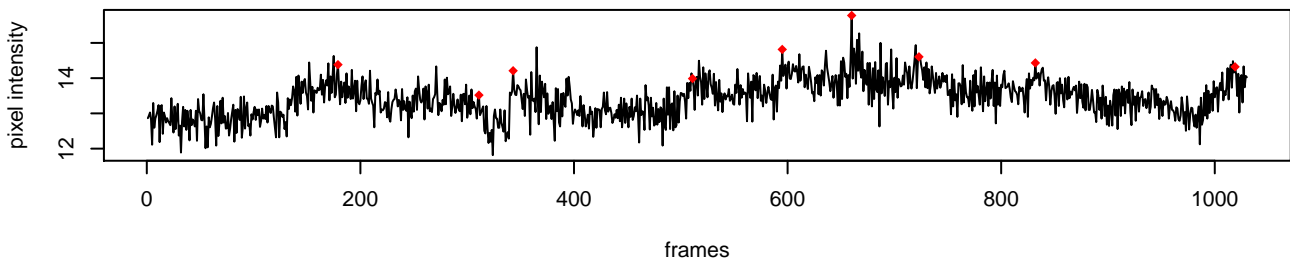

**Graph 39 , 10    Total Activity 5    Position in Array 1051**

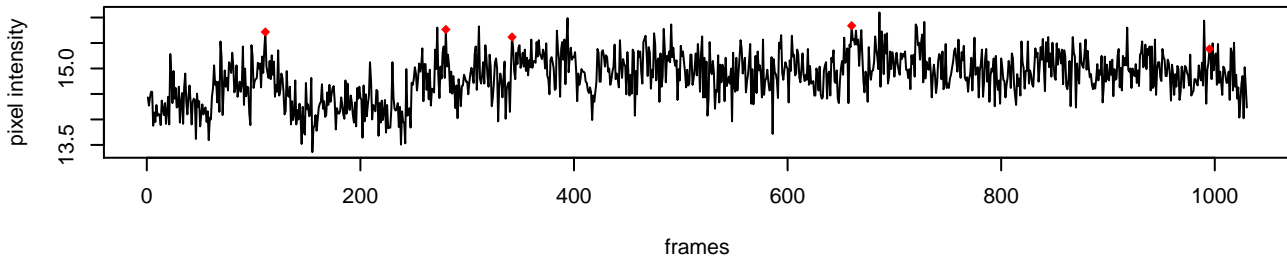

**Graph 15 , 9    Total Activity 3    Position in Array 1071**

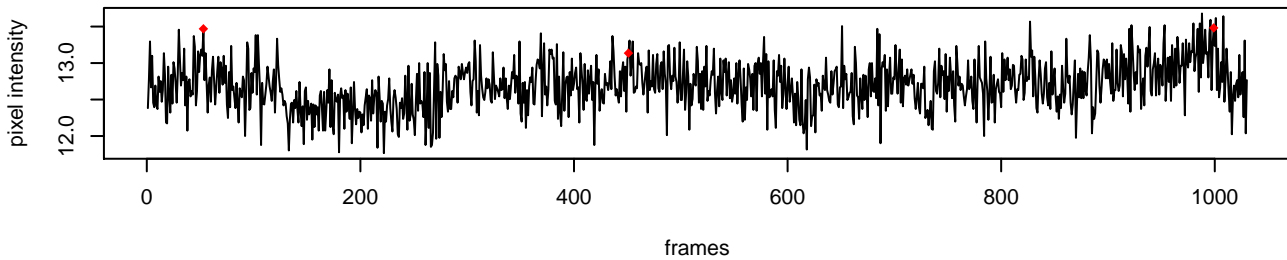

**Graph 16 , 9    Total Activity 2    Position in Array 1072**

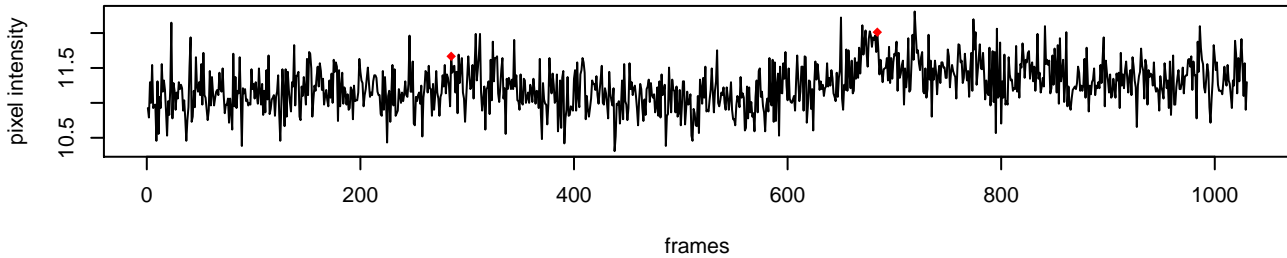

**Graph 18 , 9    Total Activity 4    Position in Array 1074**

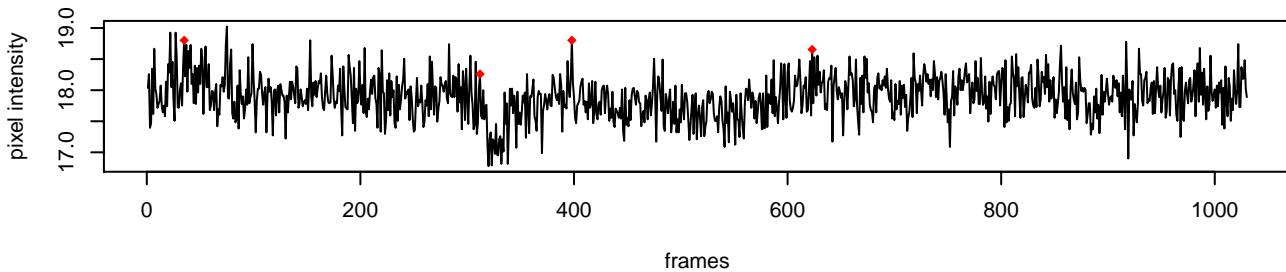

**Graph 23 , 9    Total Activity 5    Position in Array 1079**

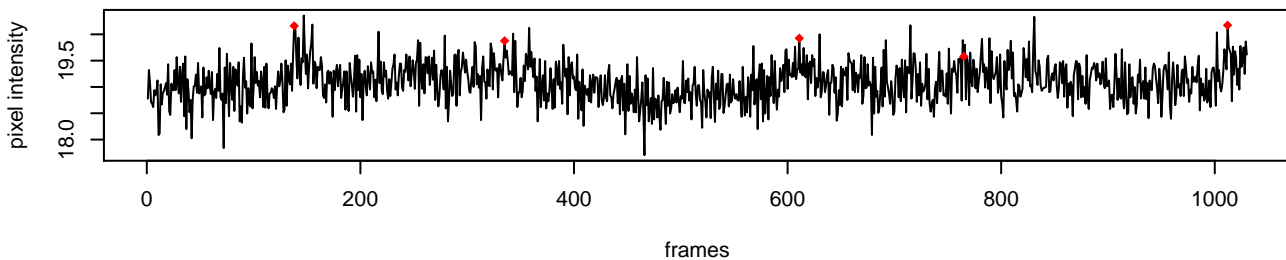

**Graph 26 , 9    Total Activity 3    Position in Array 1082**

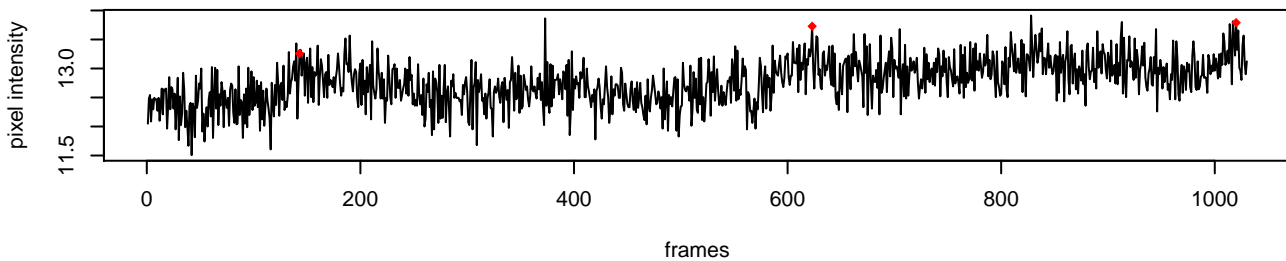

**Graph 27 , 9    Total Activity 4    Position in Array 1083**

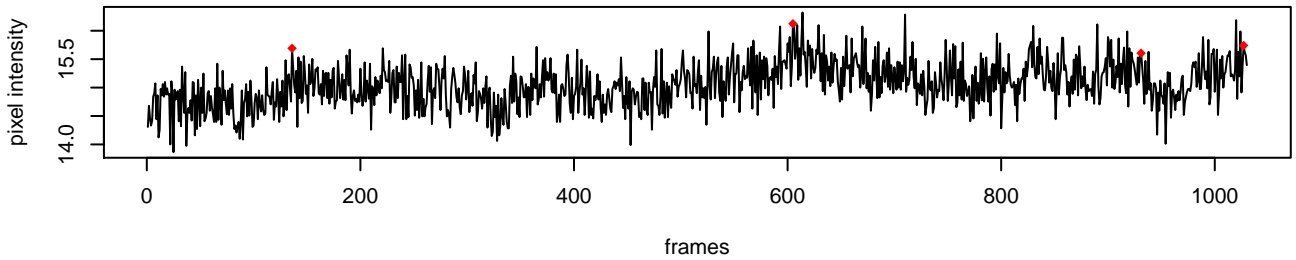

**Graph 28 , 9    Total Activity 3    Position in Array 1084**

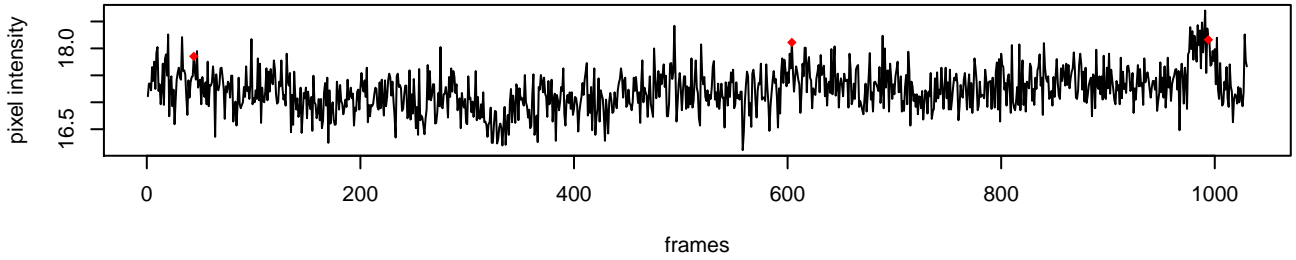

**Graph 29 , 9    Total Activity 4    Position in Array 1085**

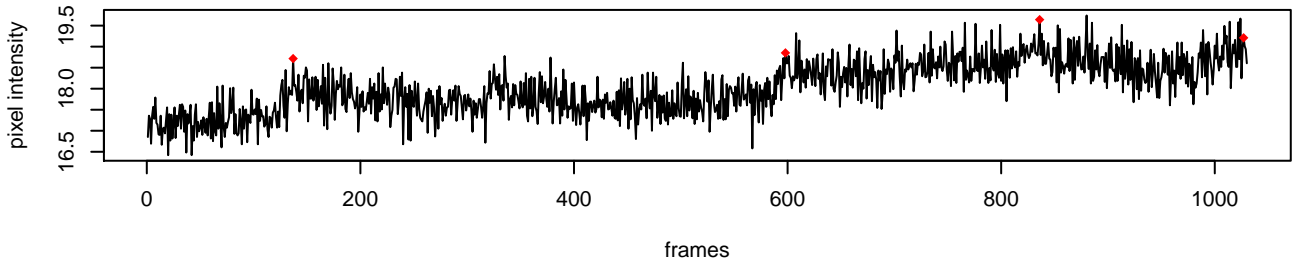

**Graph 30 , 9    Total Activity 3    Position in Array 1086**

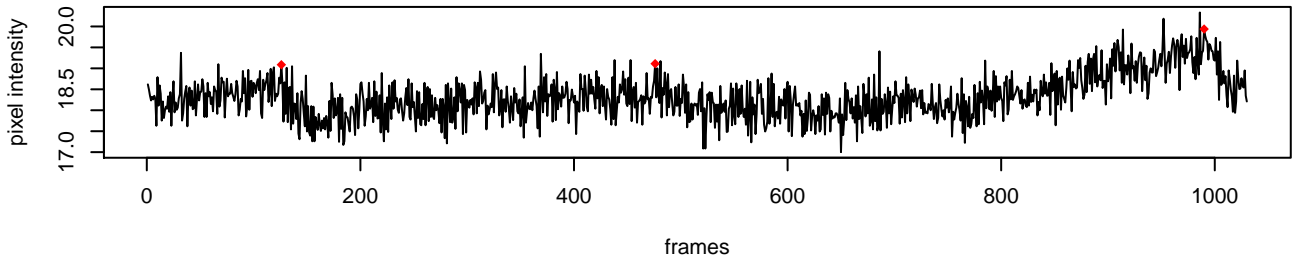

**Graph 32 , 9    Total Activity 4    Position in Array 1088**

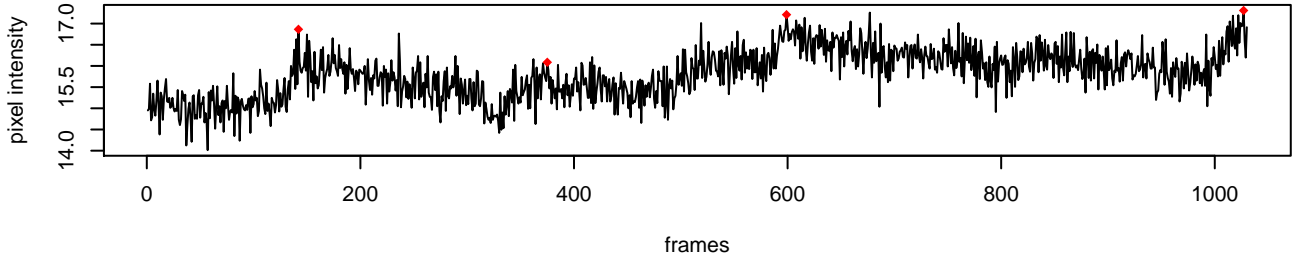

**Graph 33 , 9    Total Activity 3    Position in Array 1089**

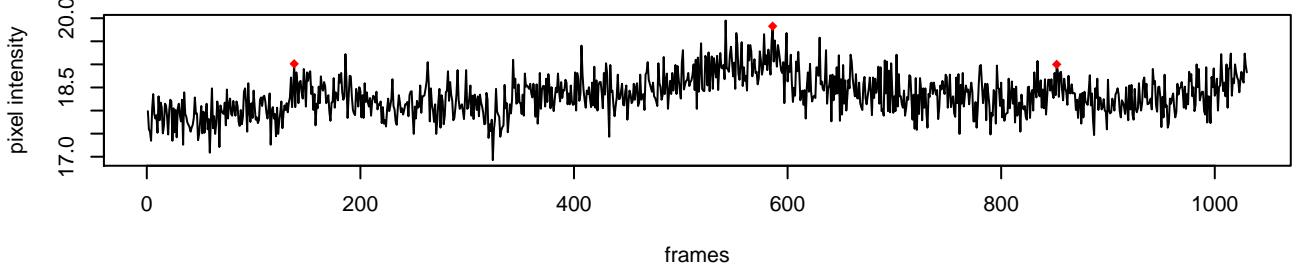

**Graph 34 , 9    Total Activity 6    Position in Array 1090**

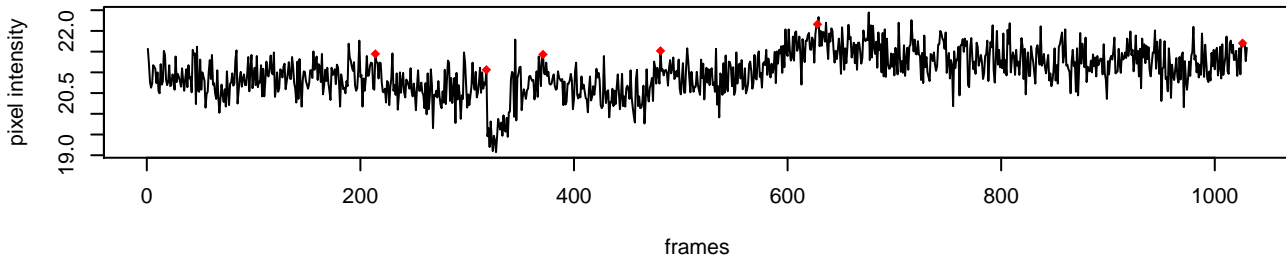

**Graph 35 , 9    Total Activity 2    Position in Array 1091**

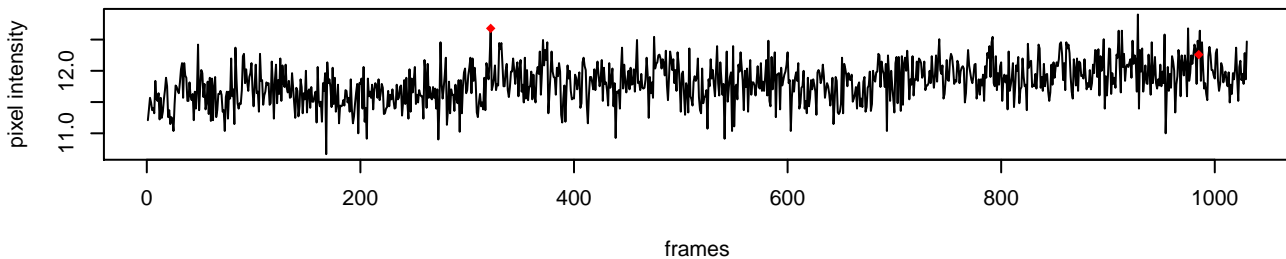

**Graph 37 , 9    Total Activity 5    Position in Array 1093**

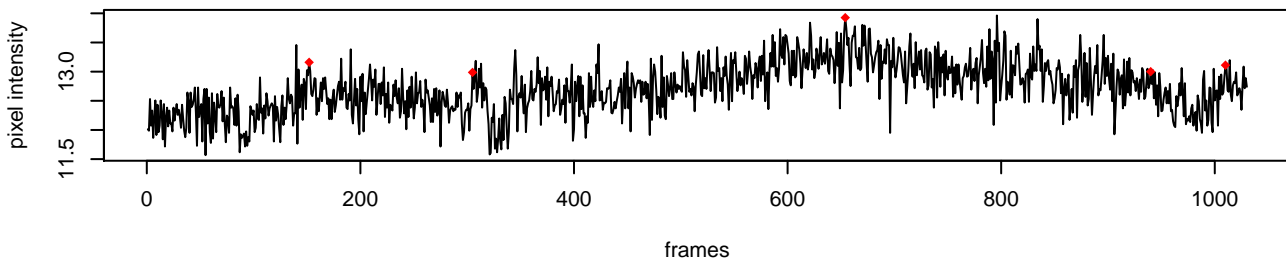



**Graph 38 , 9    Total Activity 5    Position in Array 1094**

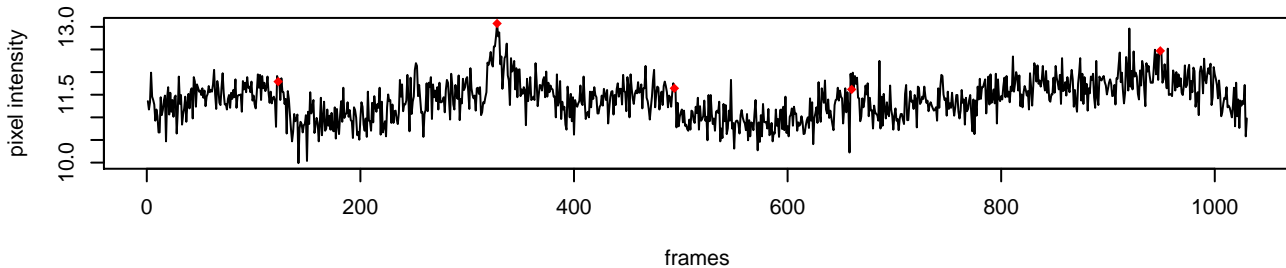

**Graph 17 , 8    Total Activity 2    Position in Array 1117**

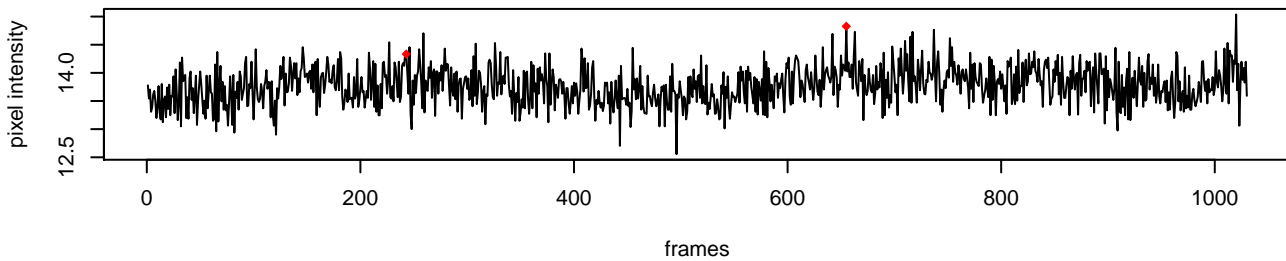

**Graph 18 , 8    Total Activity 3    Position in Array 1118**

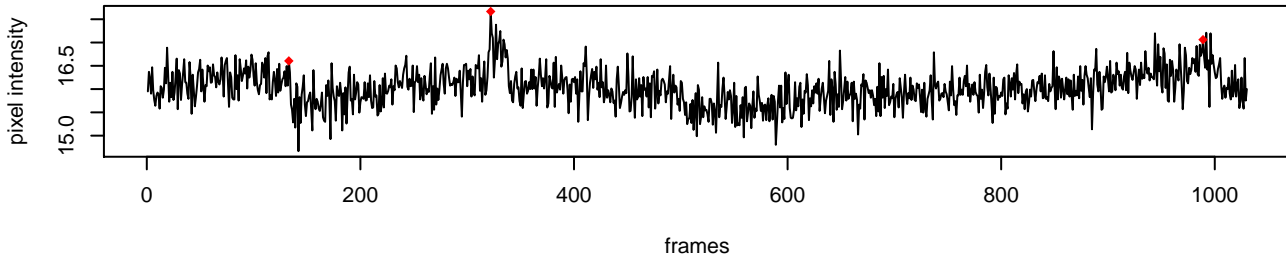

**Graph 23 , 8    Total Activity 4    Position in Array 1123**

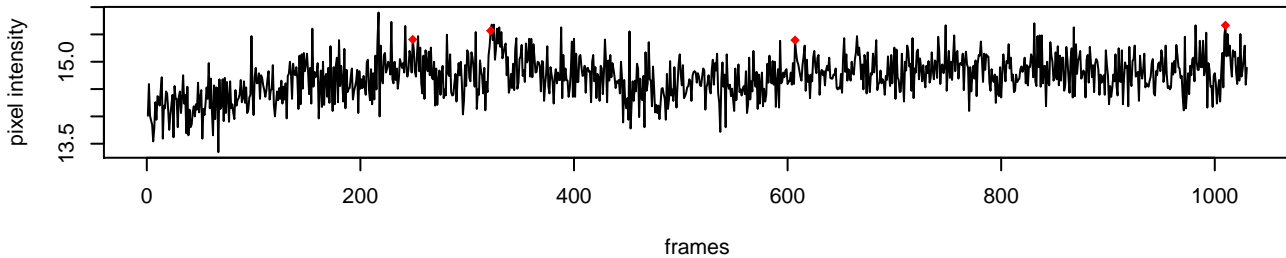

**Graph 24 , 8    Total Activity 5    Position in Array 1124**

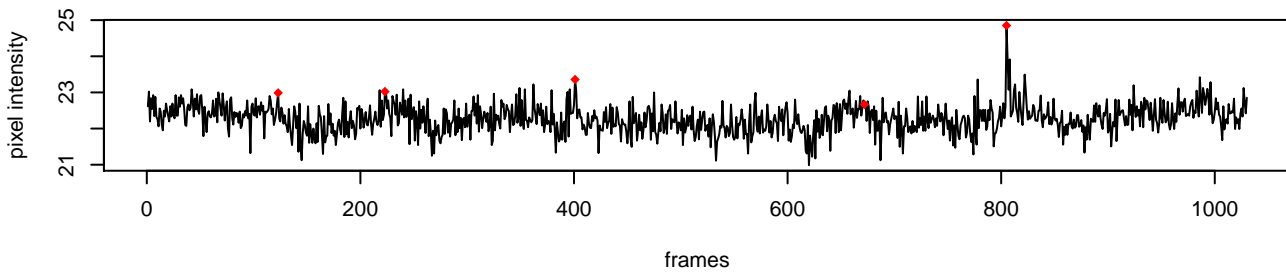

**Graph 25 , 8    Total Activity 2    Position in Array 1125**

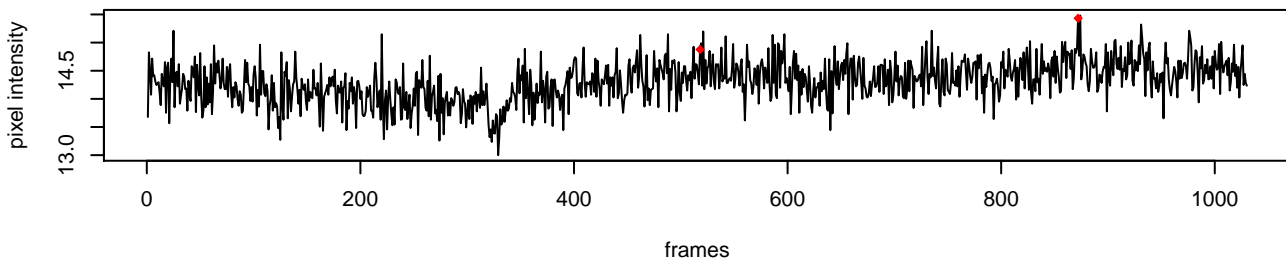

**Graph 26 , 8    Total Activity 4    Position in Array 1126**

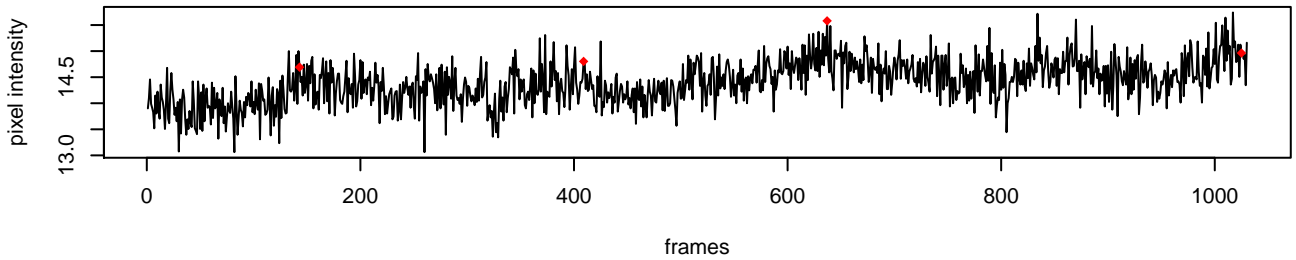

**Graph 27 , 8    Total Activity 3    Position in Array 1127**

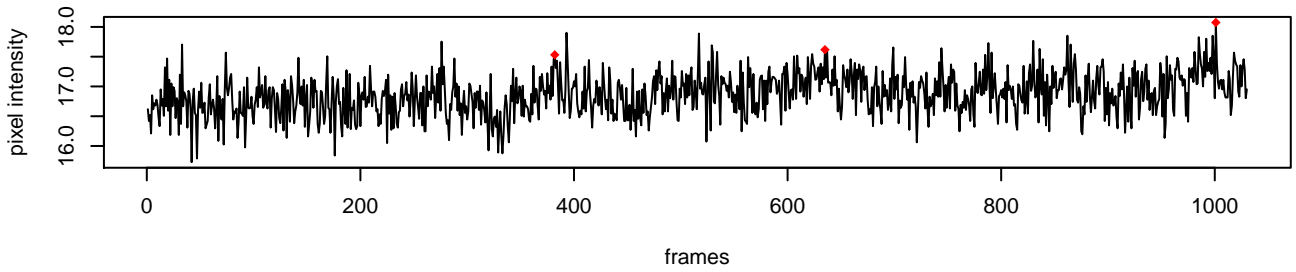

**Graph 28 , 8    Total Activity 3    Position in Array 1128**

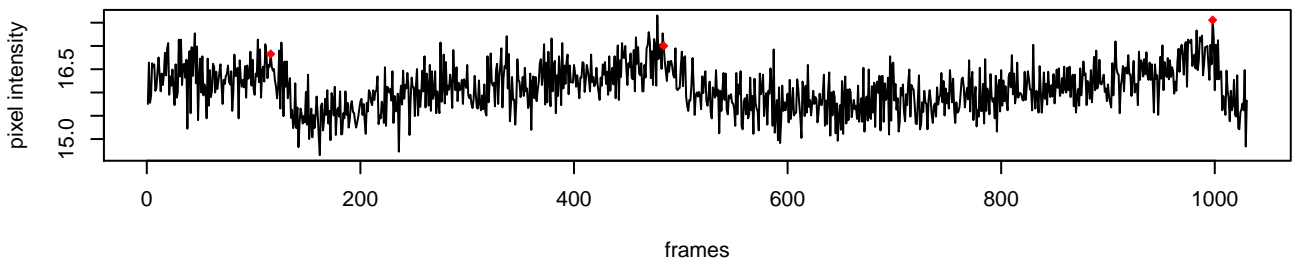

**Graph 30 , 8    Total Activity 3    Position in Array 1130**

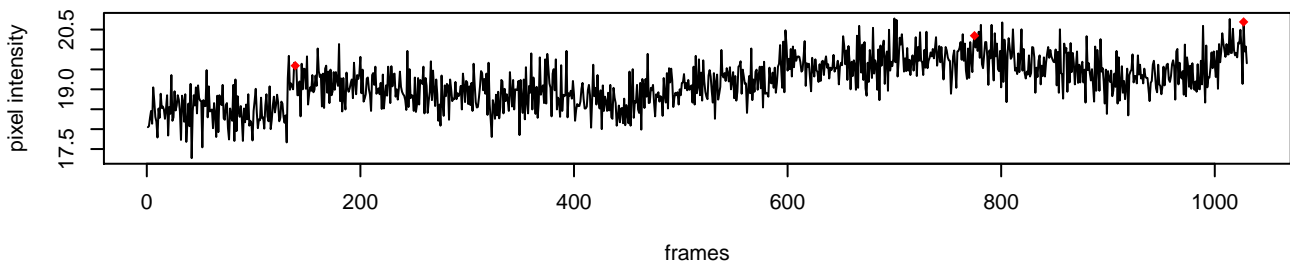

**Graph 31 , 8    Total Activity 4    Position in Array 1131**

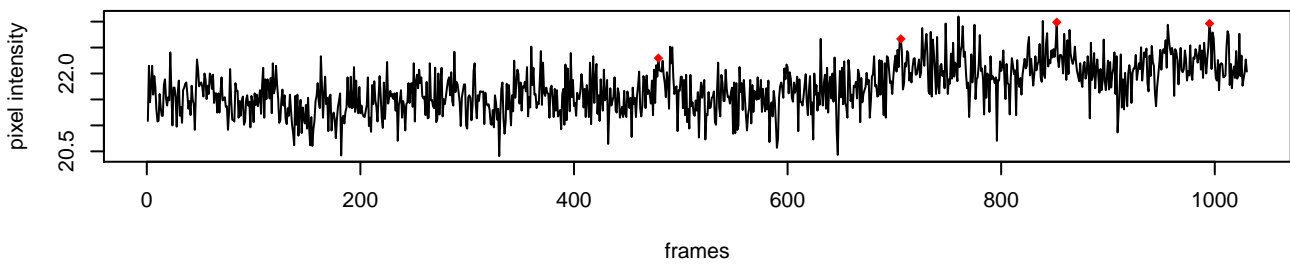

**Graph 32 , 8    Total Activity 5    Position in Array 1132**

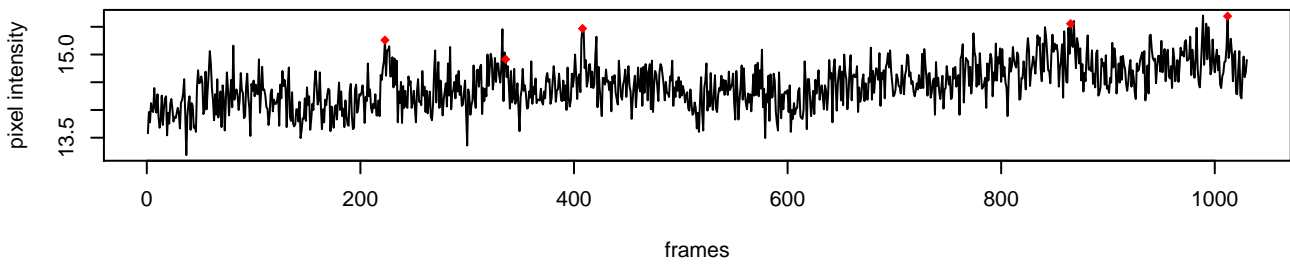

**Graph 33 , 8    Total Activity 2    Position in Array 1133**

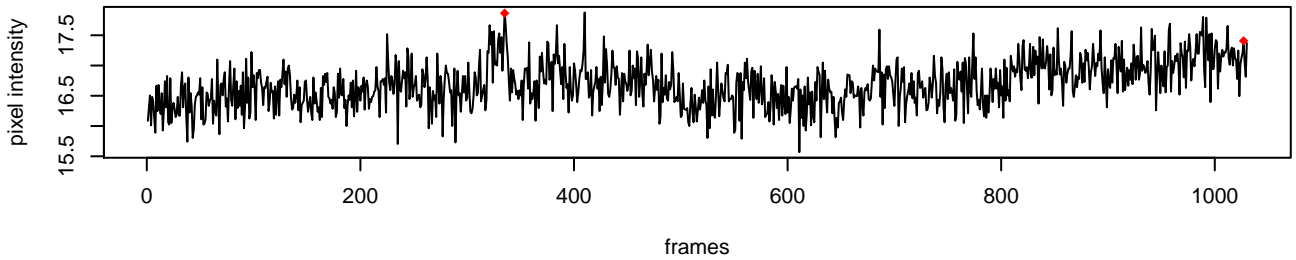

**Graph 34 , 8    Total Activity 4    Position in Array 1134**

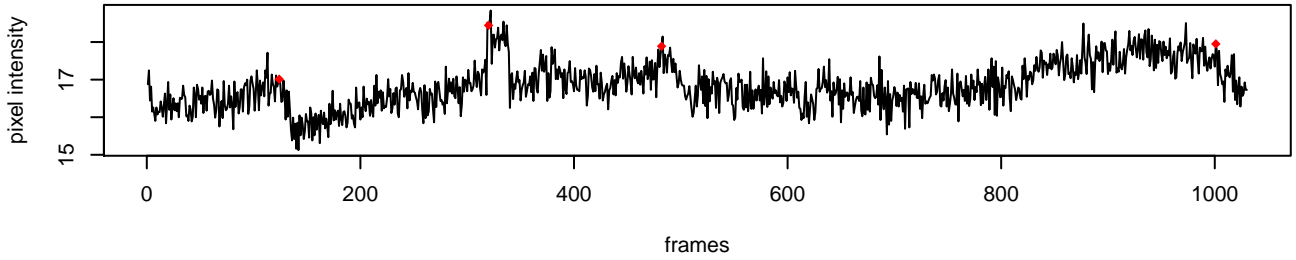

**Graph 21 , 7    Total Activity 5    Position in Array 1165**

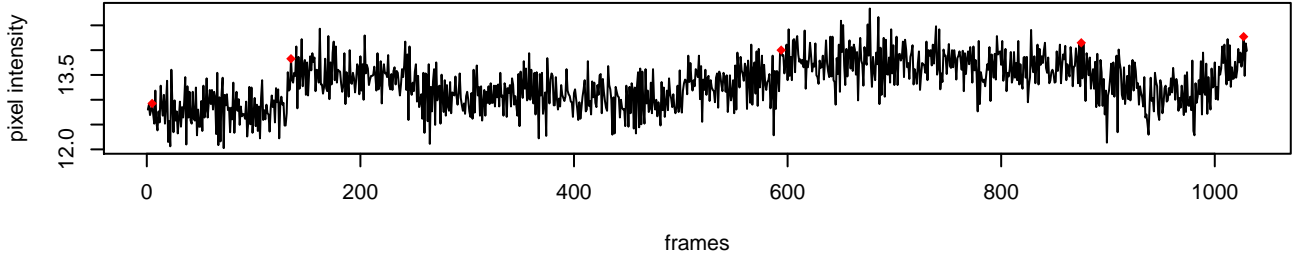

**Graph 24 , 7    Total Activity 5    Position in Array 1168**

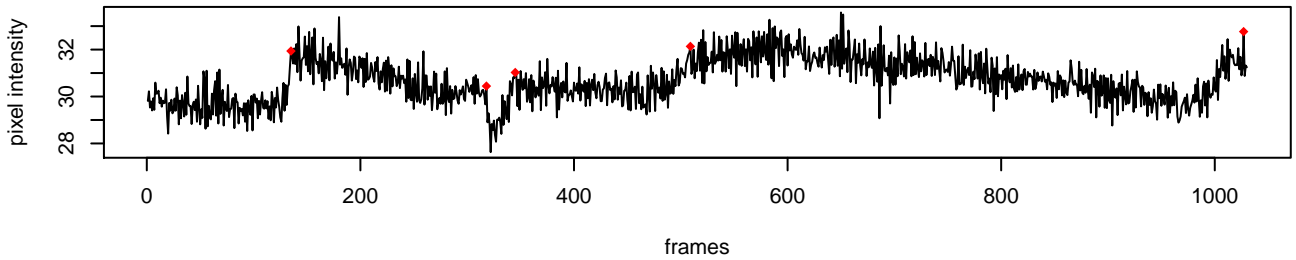

**Graph 25 , 7    Total Activity 5    Position in Array 1169**

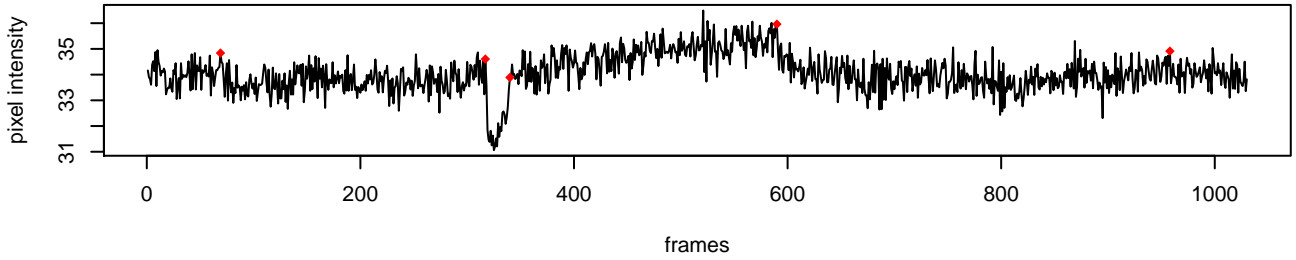

**Graph 26 , 7    Total Activity 5    Position in Array 1170**

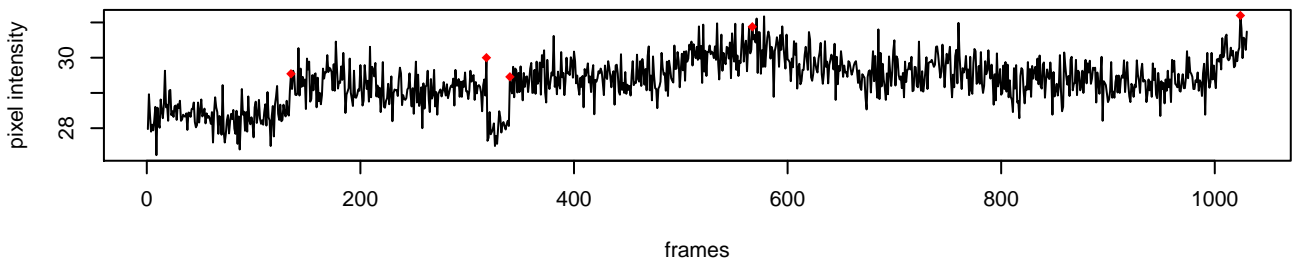

**Graph 27 , 7    Total Activity 4    Position in Array 1171**

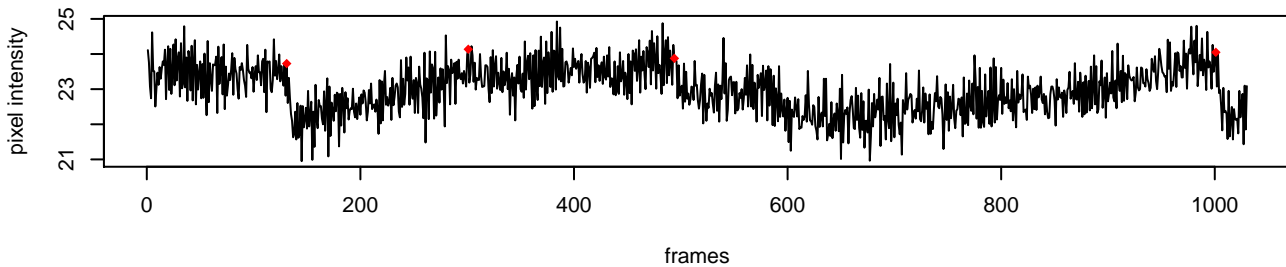

**Graph 29 , 7    Total Activity 2    Position in Array 1173**

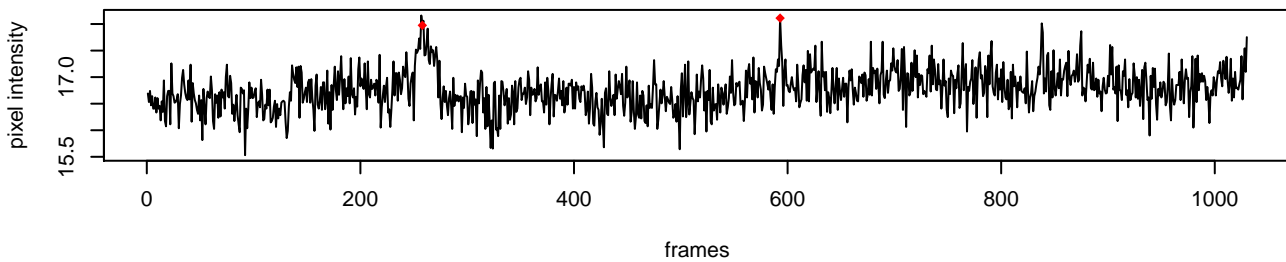

**Graph 30 , 7    Total Activity 4    Position in Array 1174**

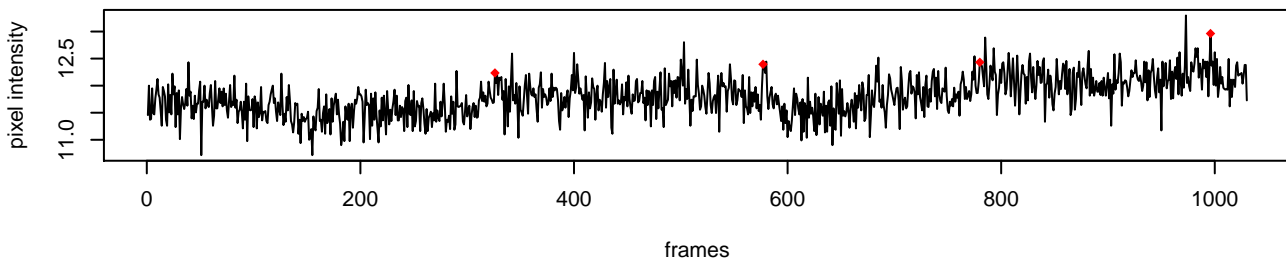

**Graph 31 , 7    Total Activity 2    Position in Array 1175**

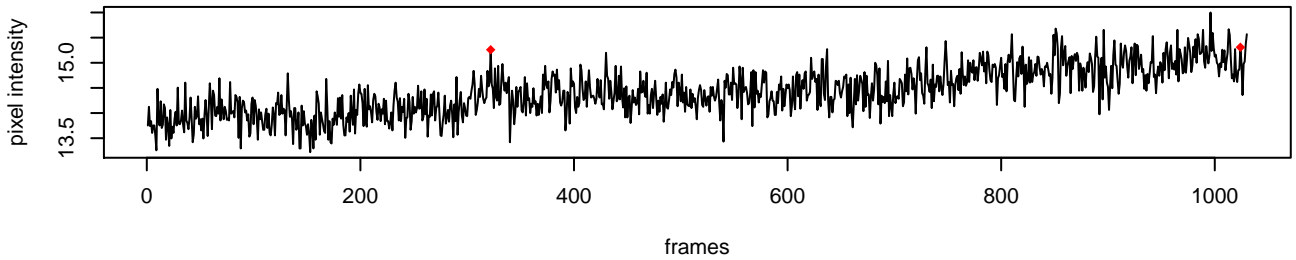

**Graph 36 , 7    Total Activity 5    Position in Array 1180**

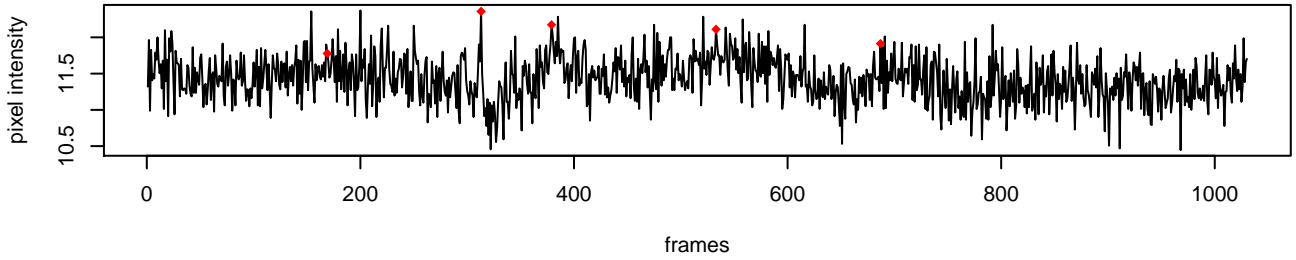

**Graph 18 , 6    Total Activity 2    Position in Array 1206**

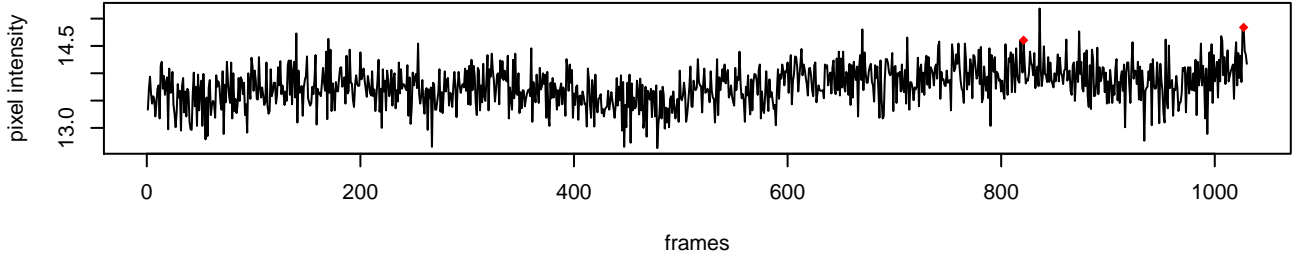



**Graph 19 , 6    Total Activity 4    Position in Array 1207**

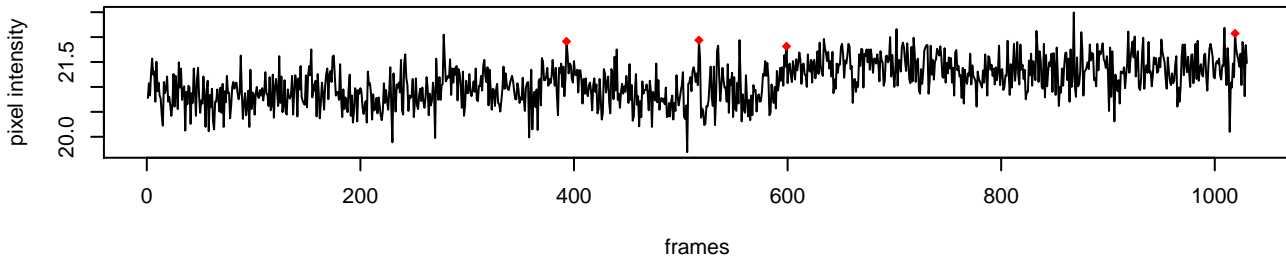

**Graph 20 , 6    Total Activity 4    Position in Array 1208**

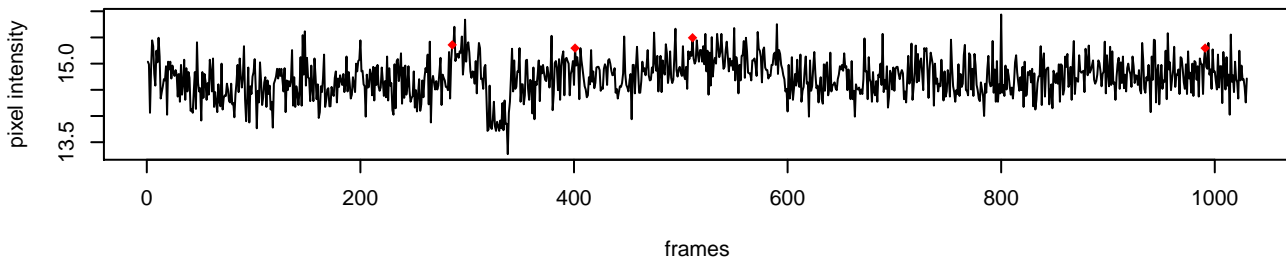

**Graph 21 , 6    Total Activity 3    Position in Array 1209**

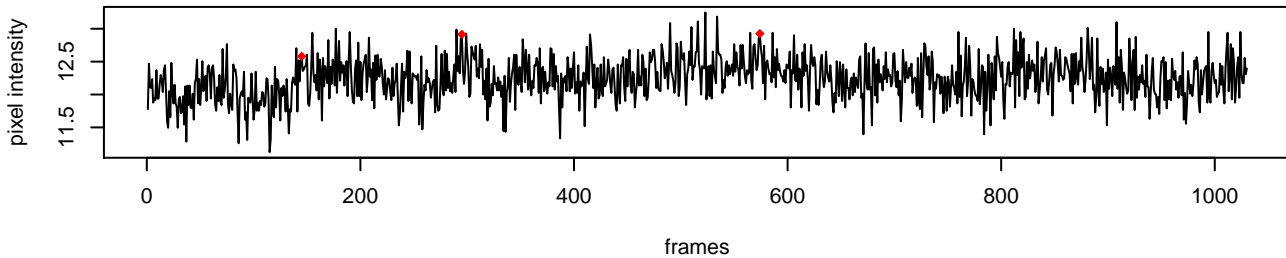

**Graph 22 , 6    Total Activity 3    Position in Array 1210**

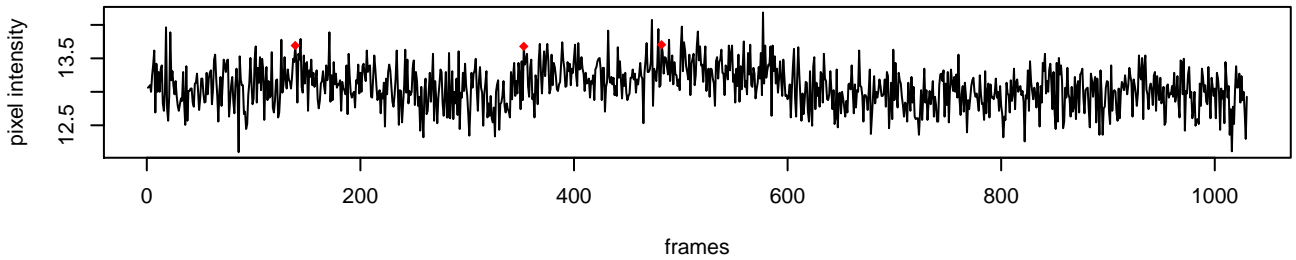

**Graph 23 , 6    Total Activity 6    Position in Array 1211**

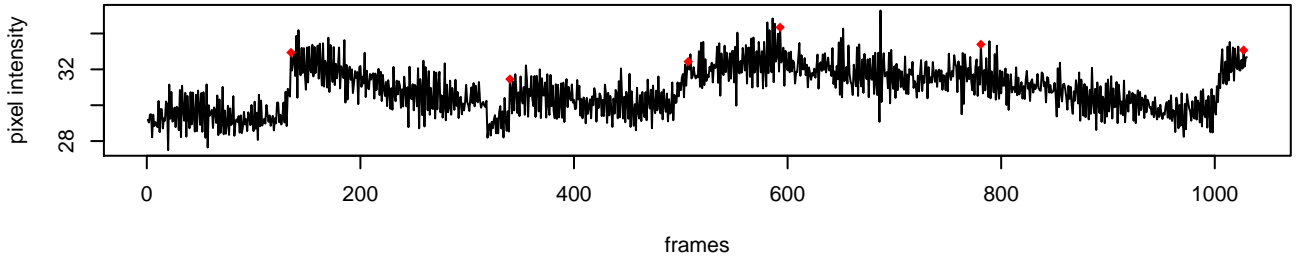

**Graph 24 , 6    Total Activity 7    Position in Array 1212**

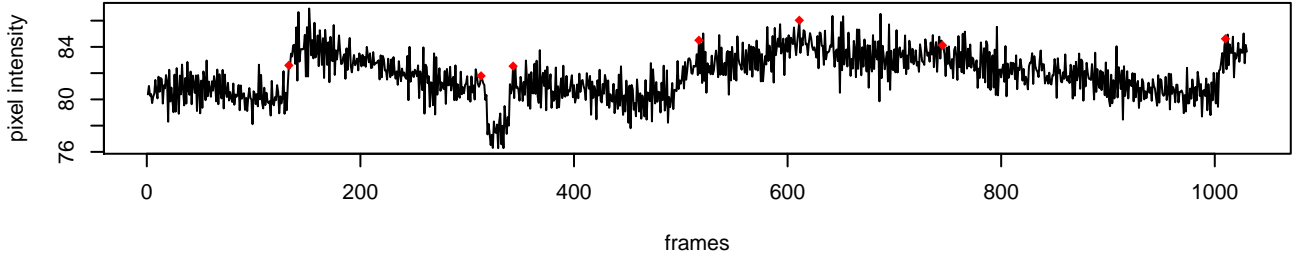

**Graph 25 , 6    Total Activity 6    Position in Array 1213**

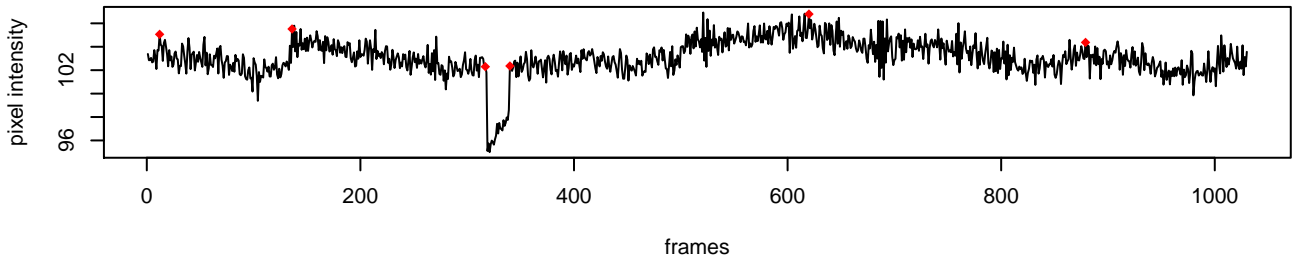

**Graph 26 , 6    Total Activity 3    Position in Array 1214**

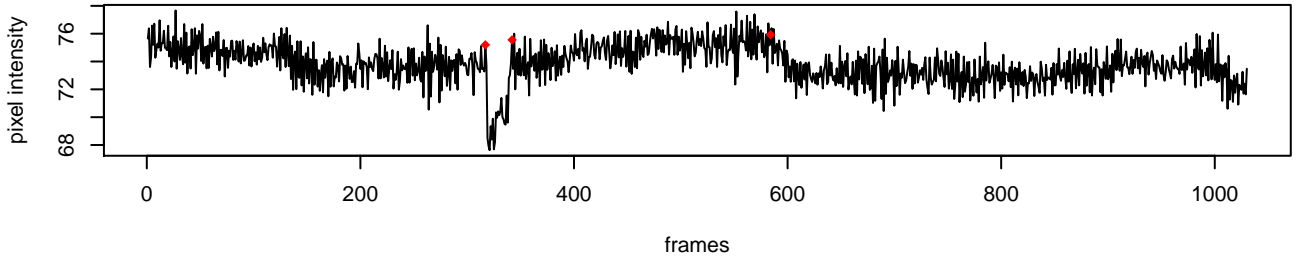

**Graph 27 , 6    Total Activity 7    Position in Array 1215**

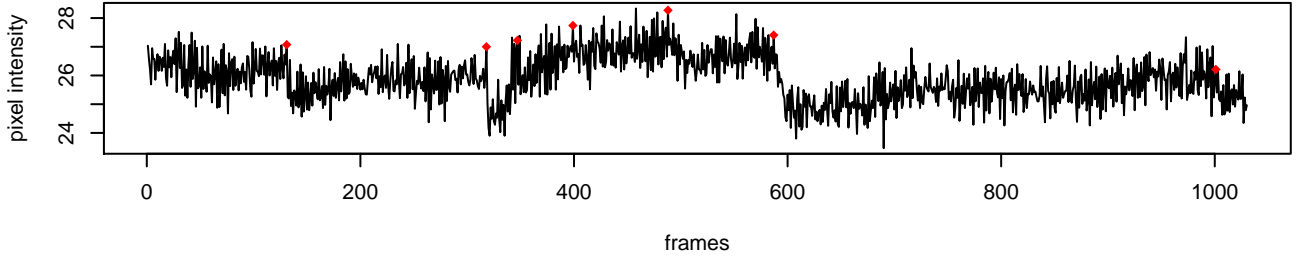

**Graph 28 , 6    Total Activity 3    Position in Array 1216**

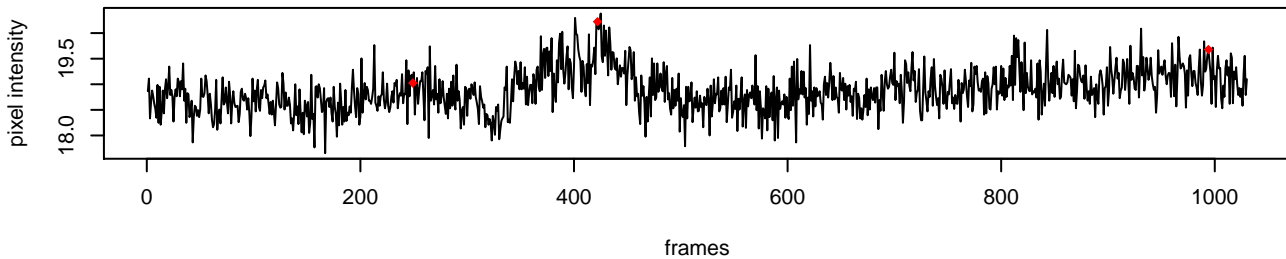

**Graph 29 , 6    Total Activity 3    Position in Array 1217**

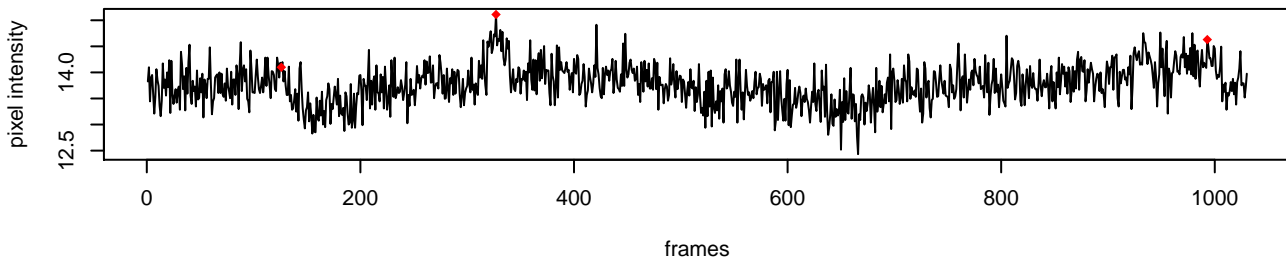

**Graph 30 , 6    Total Activity 4    Position in Array 1218**

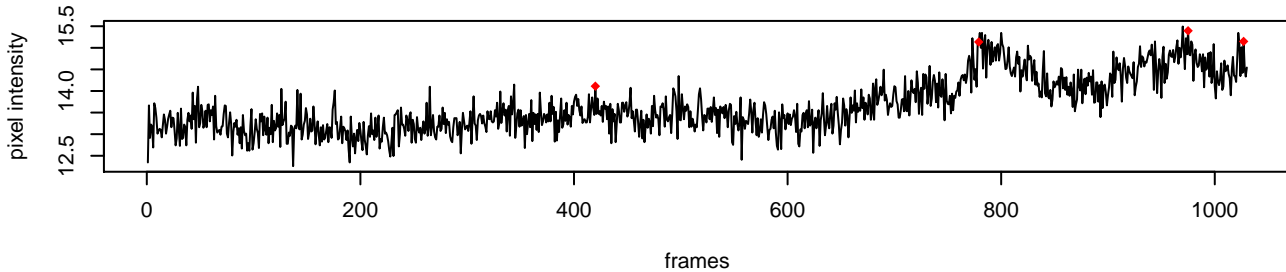

**Graph 31 , 6    Total Activity 4    Position in Array 1219**

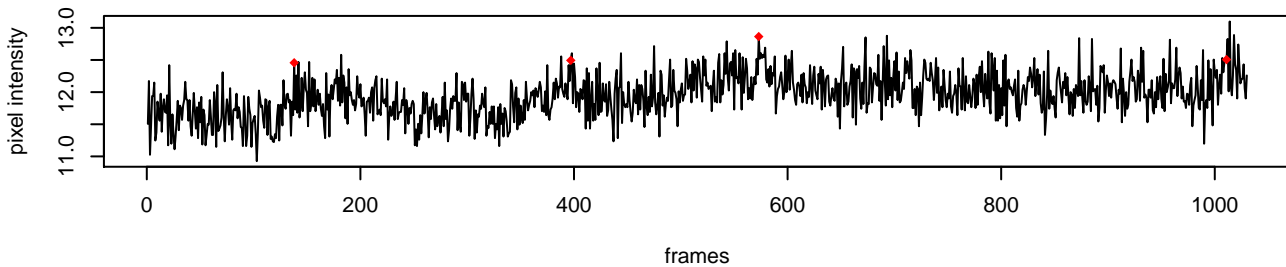

**Graph 15 , 5    Total Activity 3    Position in Array 1247**

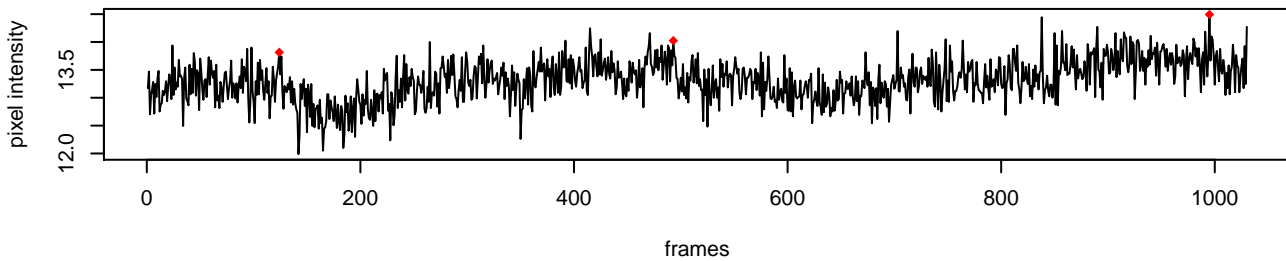

**Graph 19 , 5    Total Activity 4    Position in Array 1251**

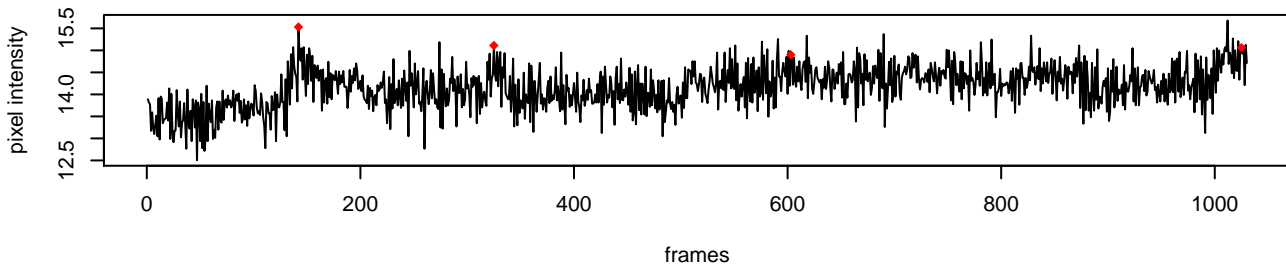

**Graph 20 , 5    Total Activity 3    Position in Array 1252**

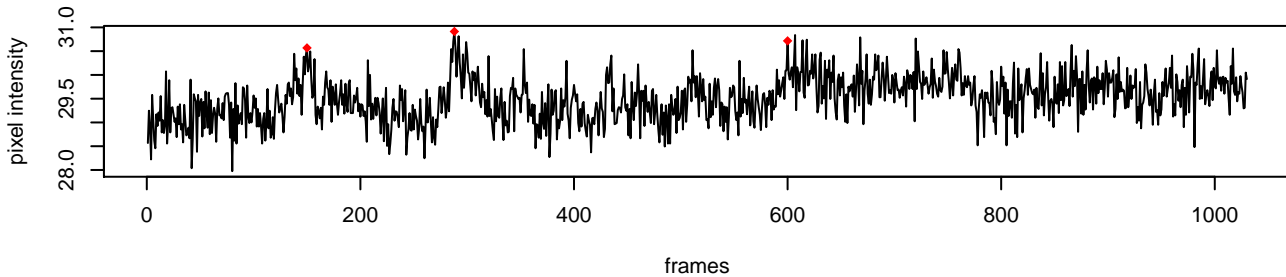

**Graph 21 , 5    Total Activity 5    Position in Array 1253**

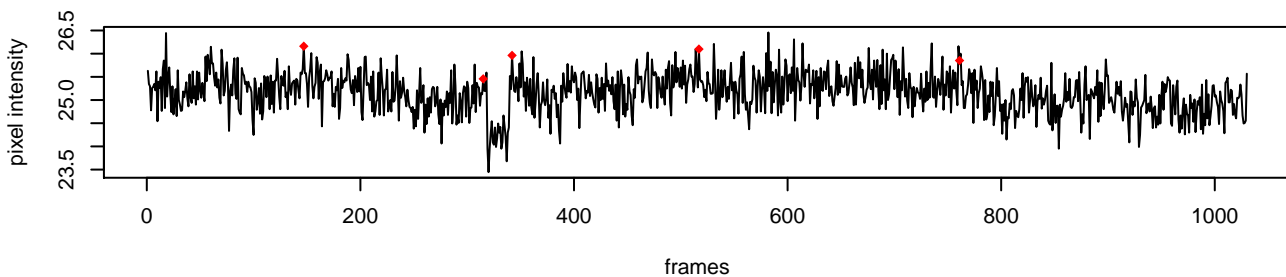

**Graph 22 , 5    Total Activity 5    Position in Array 1254**

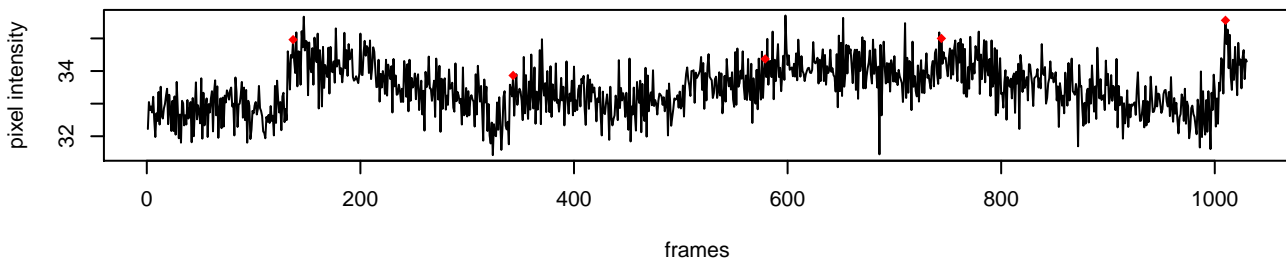

**Graph 23 , 5    Total Activity 4    Position in Array 1255**

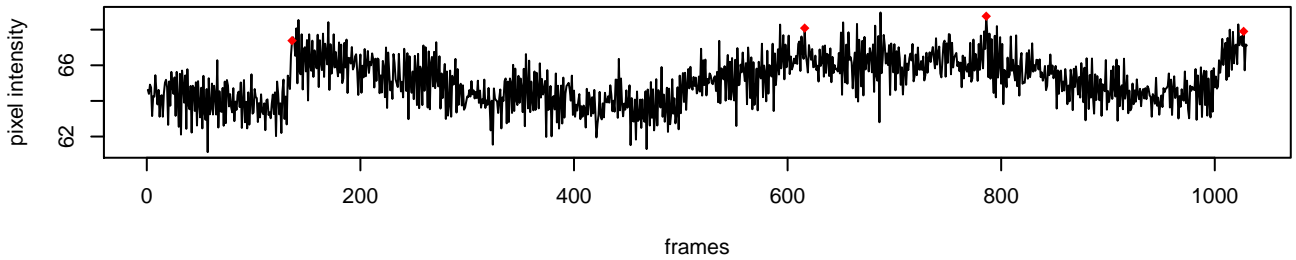

**Graph 24 , 5    Total Activity 6    Position in Array 1256**

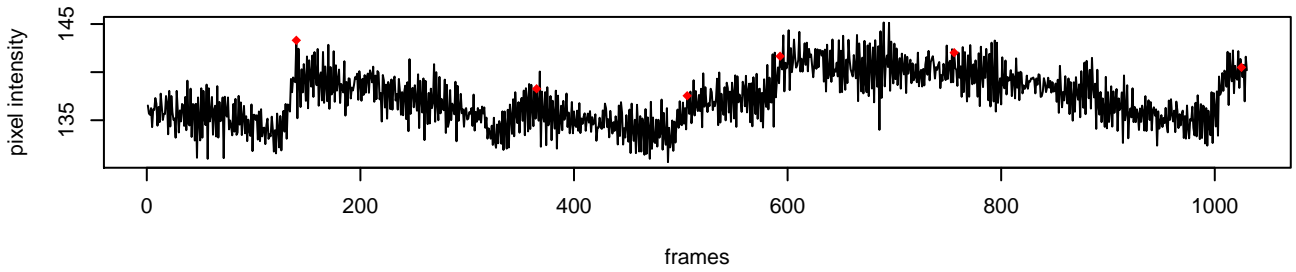

**Graph 25 , 5    Total Activity 7    Position in Array 1257**

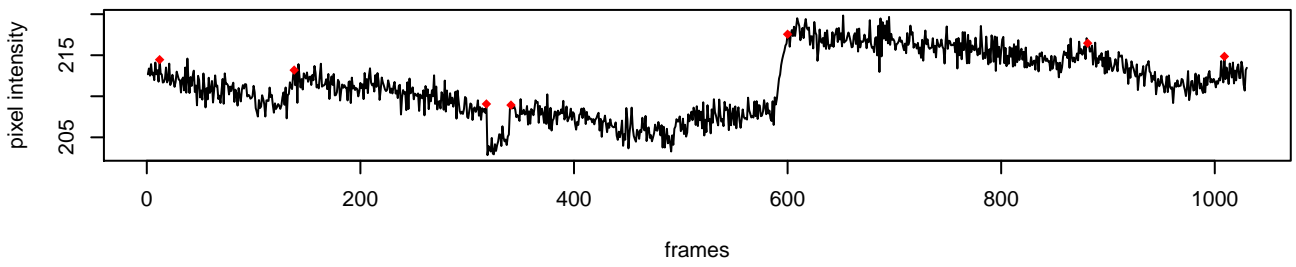

**Graph 26 , 5    Total Activity 4    Position in Array 1258**

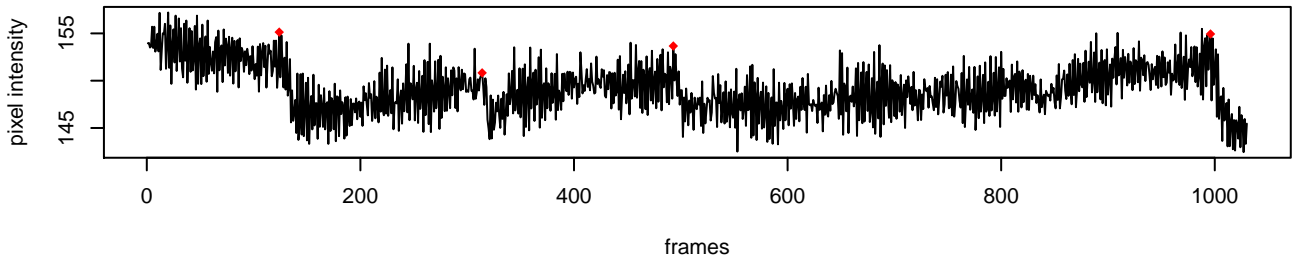

**Graph 27 , 5    Total Activity 4    Position in Array 1259**

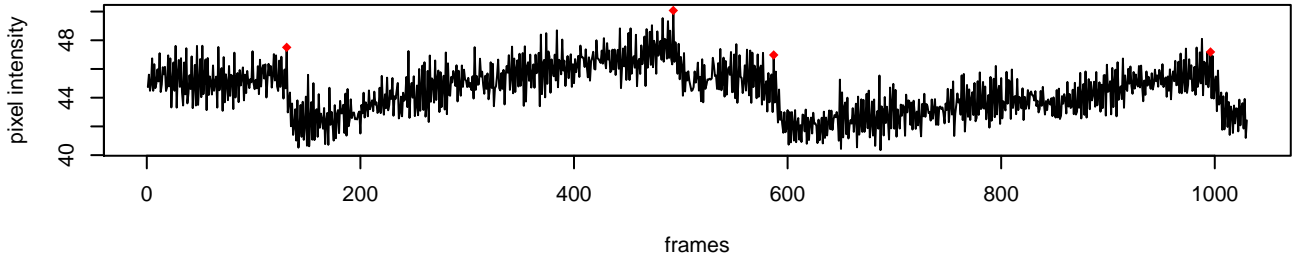

**Graph 28 , 5    Total Activity 3    Position in Array 1260**

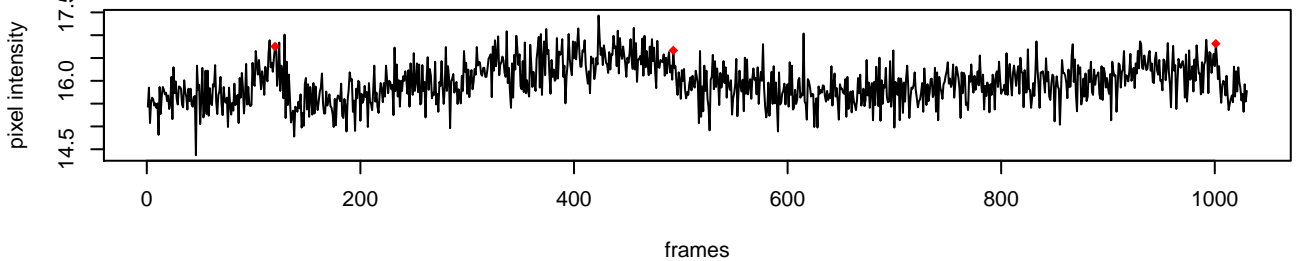



**Graph 29 , 5    Total Activity 5    Position in Array 1261**

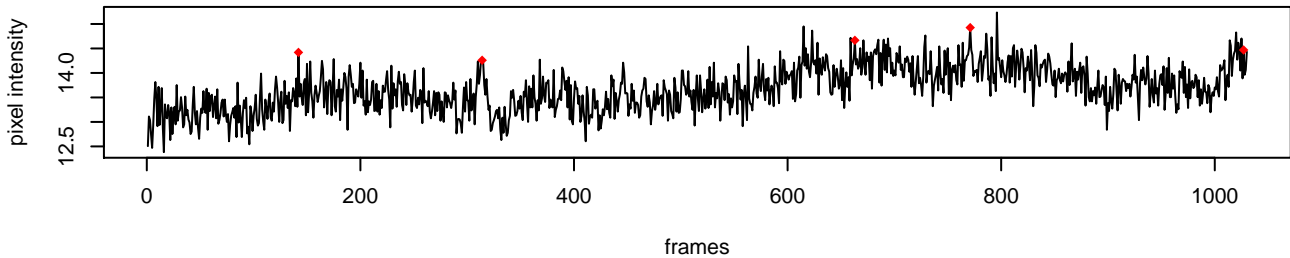

**Graph 30 , 5    Total Activity 5    Position in Array 1262**

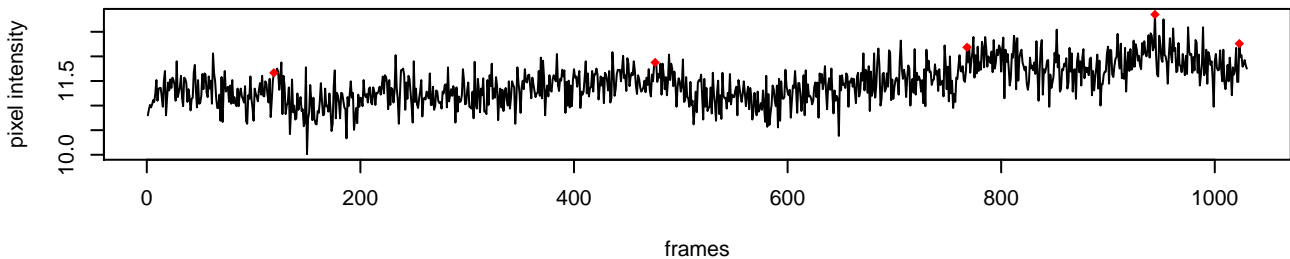

**Graph 32 , 5    Total Activity 3    Position in Array 1264**

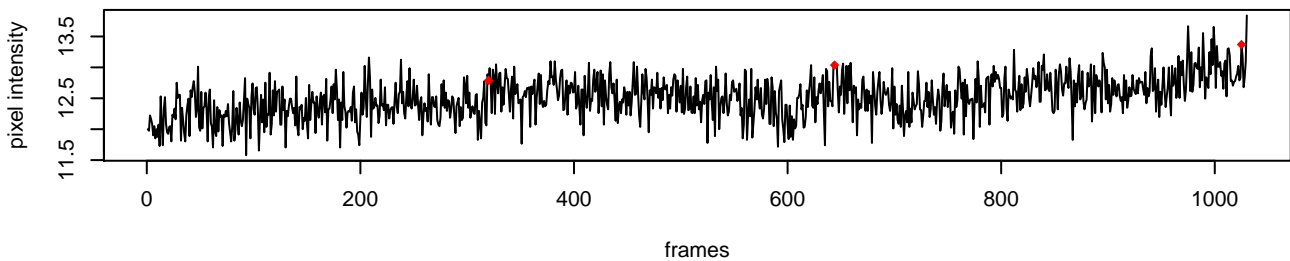

**Graph 36 , 5    Total Activity 4    Position in Array 1268**

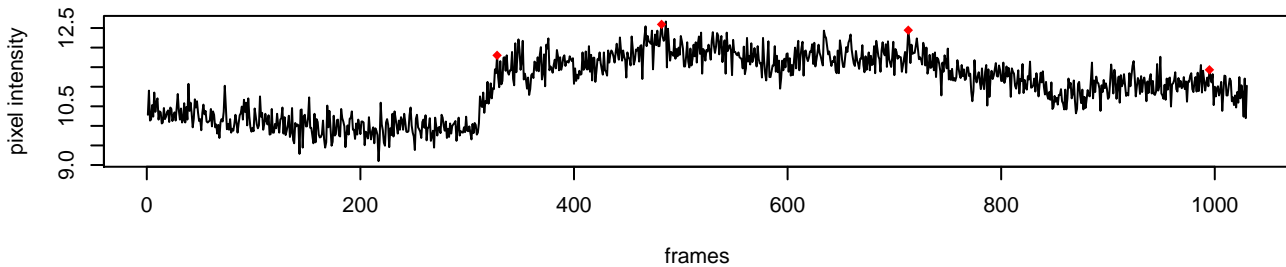

**Graph 19 , 4    Total Activity 5    Position in Array 1295**

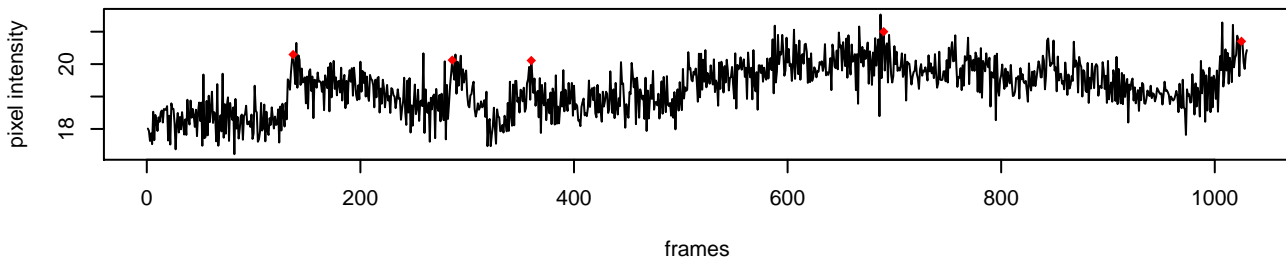

**Graph 20 , 4    Total Activity 6    Position in Array 1296**

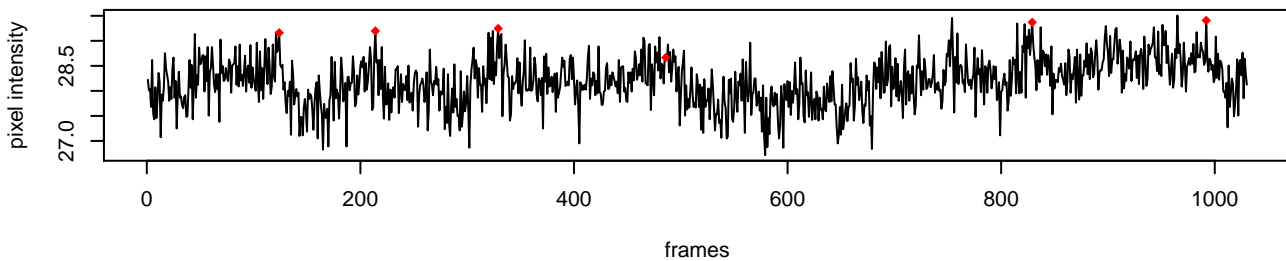

**Graph 21 , 4    Total Activity 5    Position in Array 1297**

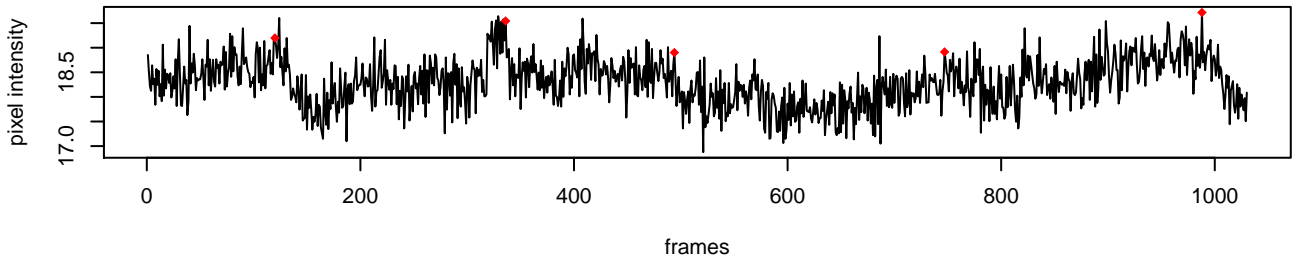

**Graph 22 , 4    Total Activity 2    Position in Array 1298**

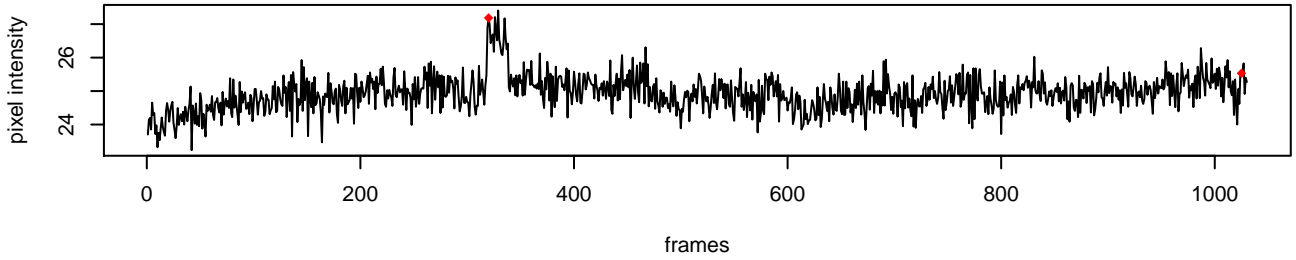

**Graph 23 , 4    Total Activity 4    Position in Array 1299**

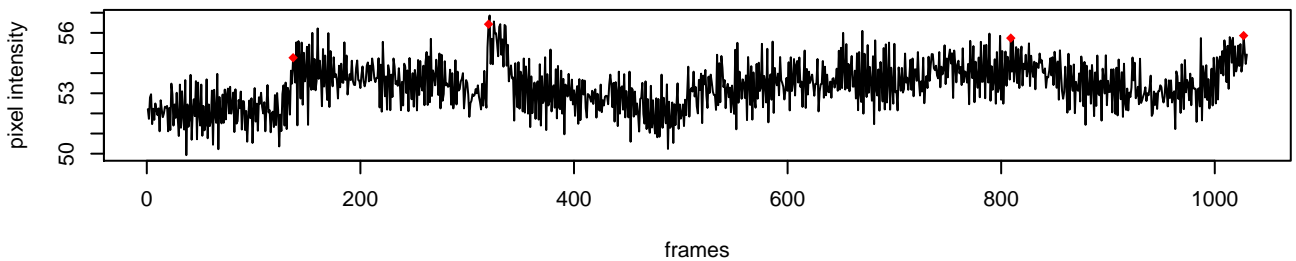

**Graph 24 , 4    Total Activity 5    Position in Array 1300**

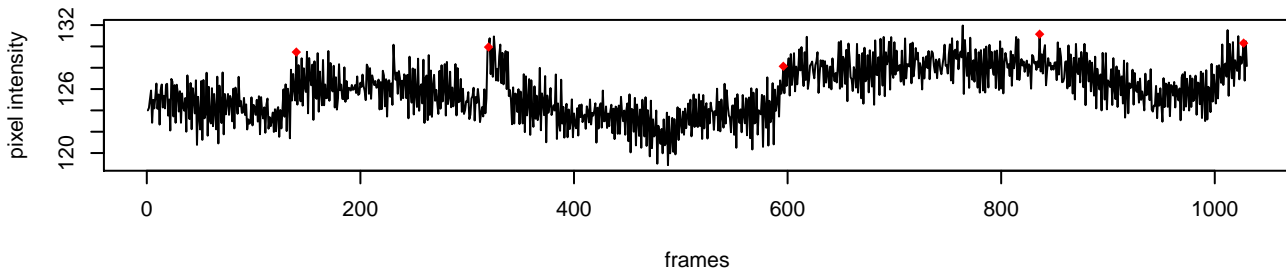

**Graph 25 , 4    Total Activity 7    Position in Array 1301**

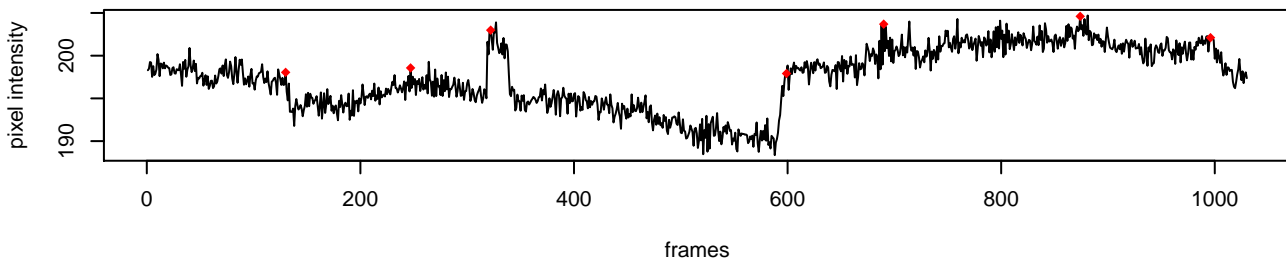

**Graph 26 , 4    Total Activity 4    Position in Array 1302**

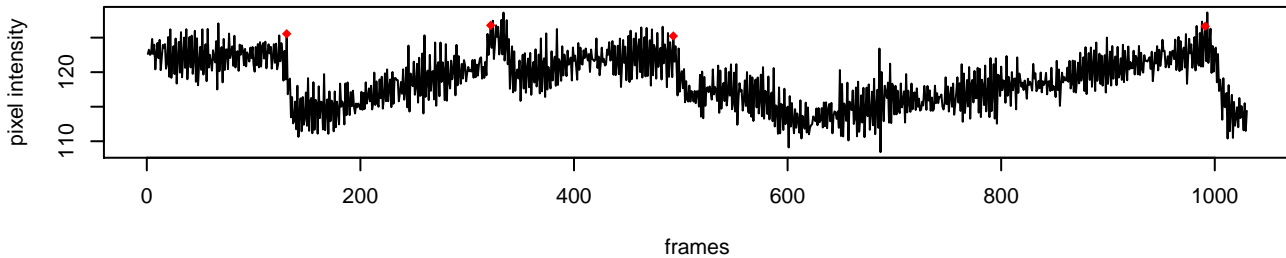

**Graph 27 , 4    Total Activity 6    Position in Array 1303**

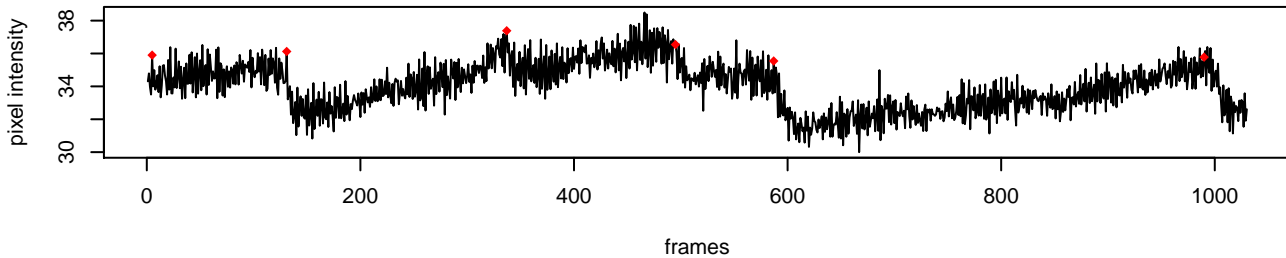

**Graph 28 , 4    Total Activity 2    Position in Array 1304**

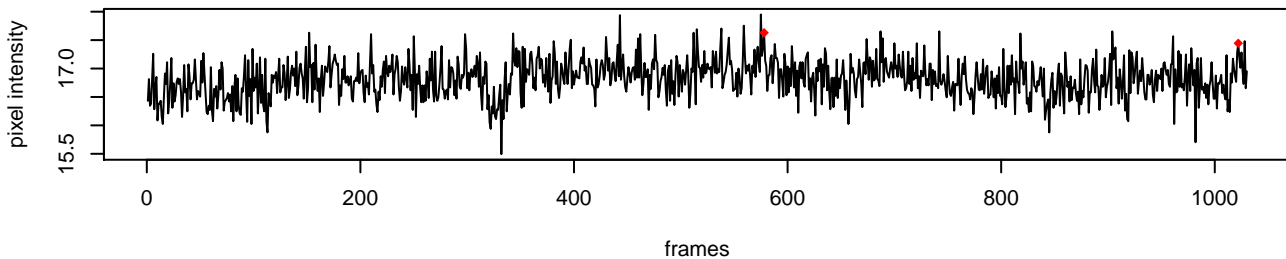

**Graph 29 , 4    Total Activity 2    Position in Array 1305**

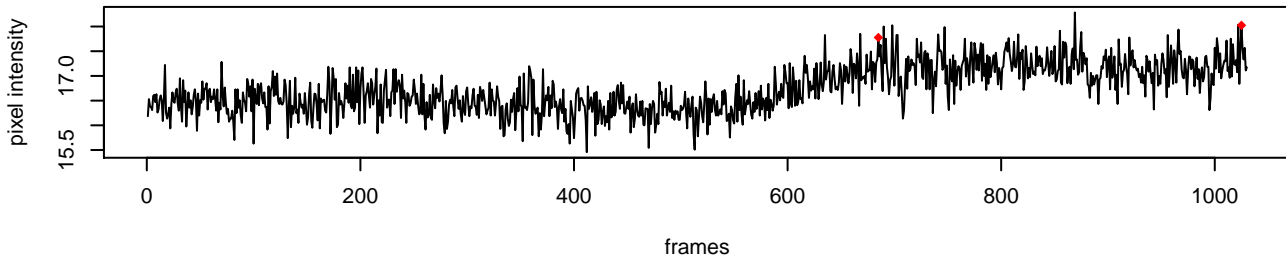

**Graph 19 , 3    Total Activity 11    Position in Array 1339**

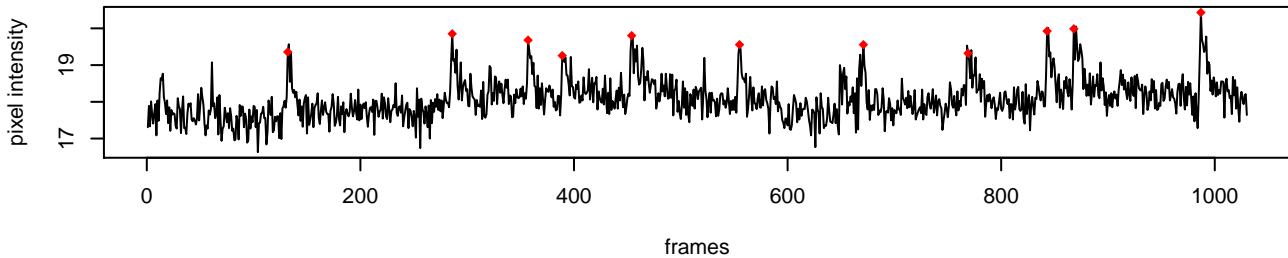

**Graph 20 , 3    Total Activity 5    Position in Array 1340**

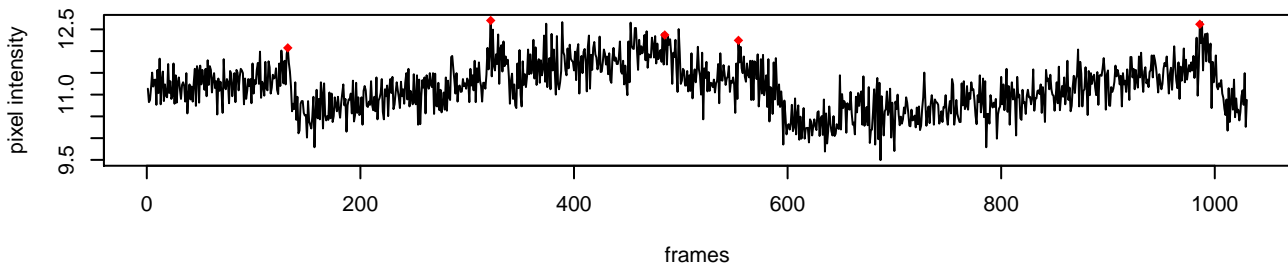

**Graph 23 , 3    Total Activity 5    Position in Array 1343**

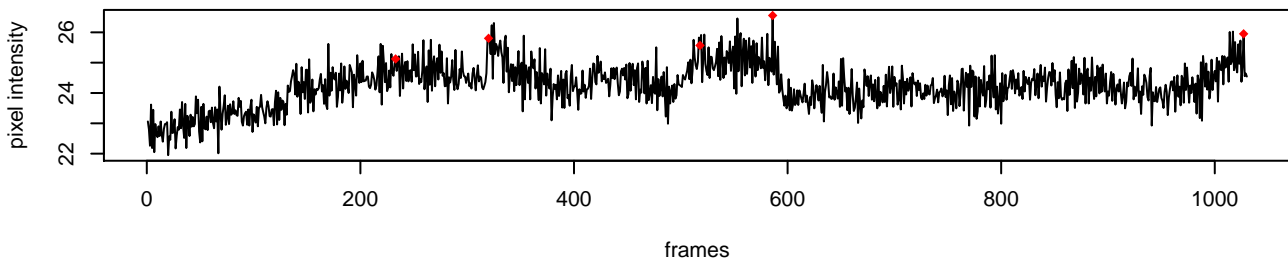

**Graph 24 , 3    Total Activity 3    Position in Array 1344**

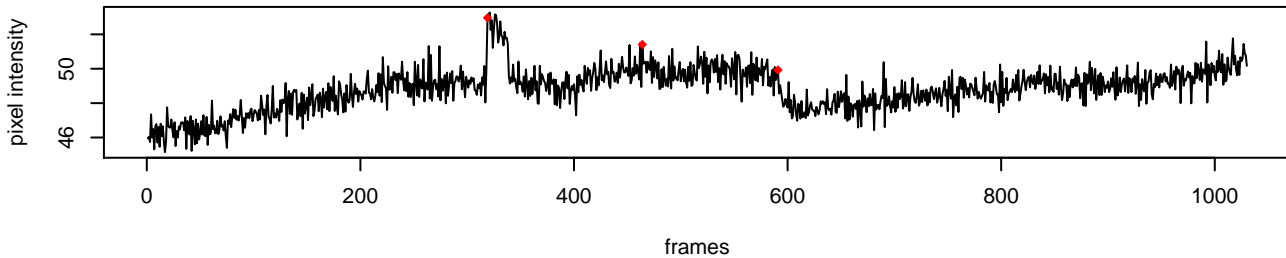

**Graph 25 , 3    Total Activity 6    Position in Array 1345**

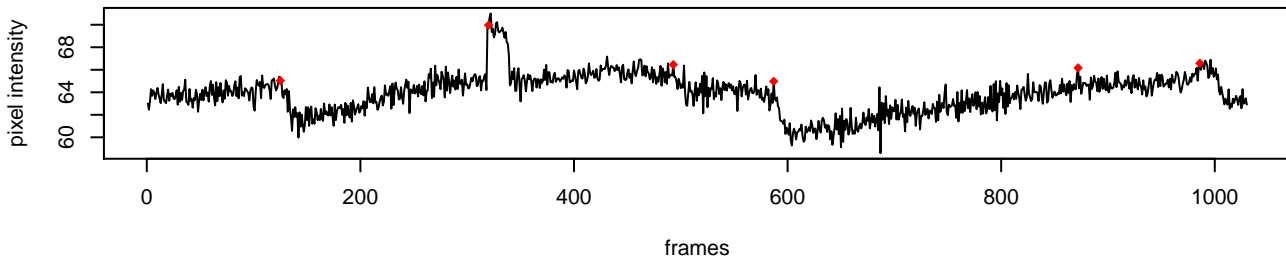

**Graph 26 , 3    Total Activity 5    Position in Array 1346**

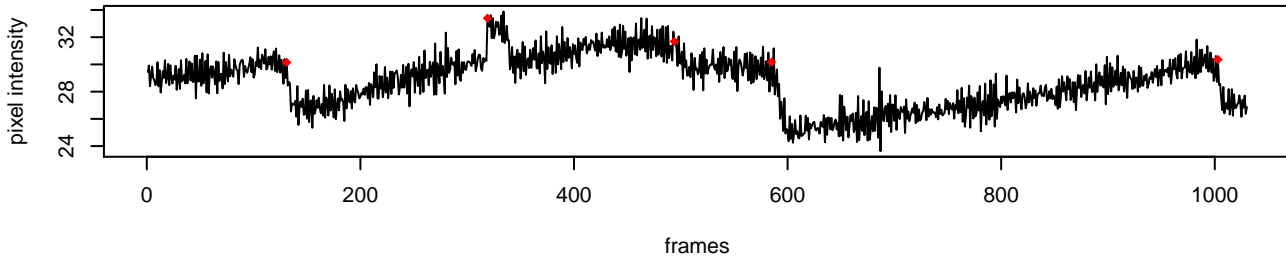

**Graph 27 , 3    Total Activity 5    Position in Array 1347**

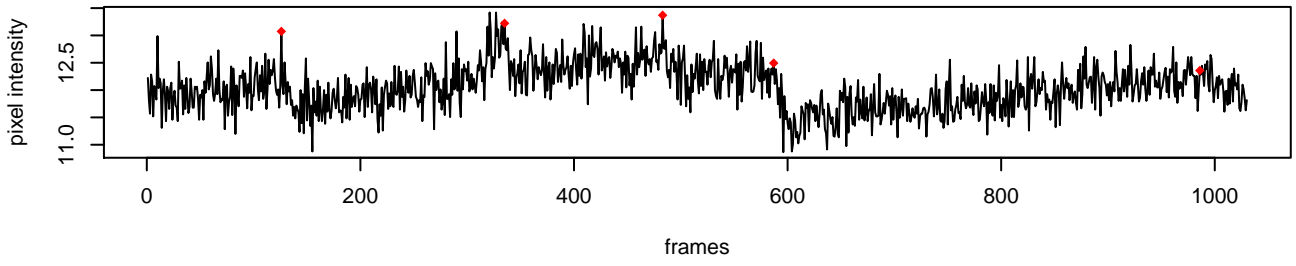

**Graph 25 , 2    Total Activity 3    Position in Array 1389**

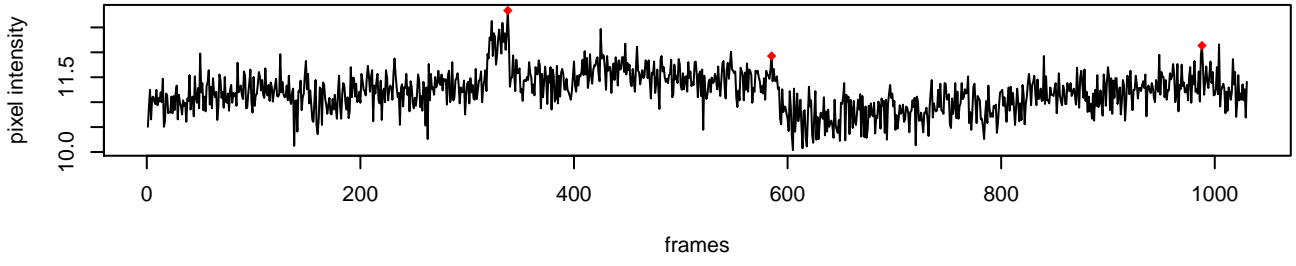

Supplement: pcbi.1006054.s005.pdf [file pcbi.1006054.s005.pdf]
