# Supplementary material for: An open source tool for automatic spatiotemporal assessment of calcium transients and local ‘signal-close-to-noise’ activity in calcium imaging data
Source: PubMed Central journal article supplement (PMC5895056; doi:10.1371/journal.pcbi.1006054), 2018-03-30

# Total activity 6706

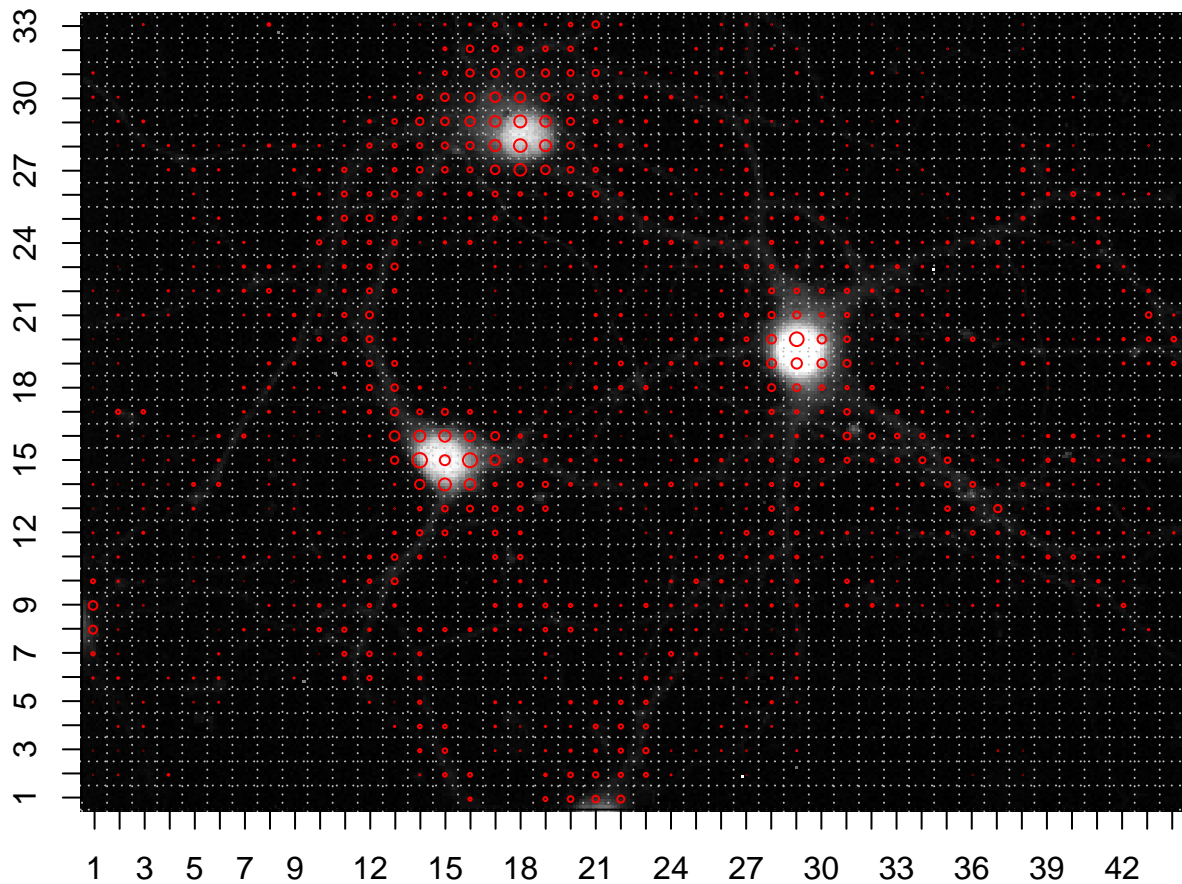

**Graph 17 , 33 Total Activity 12**

**Variance Area 1797**

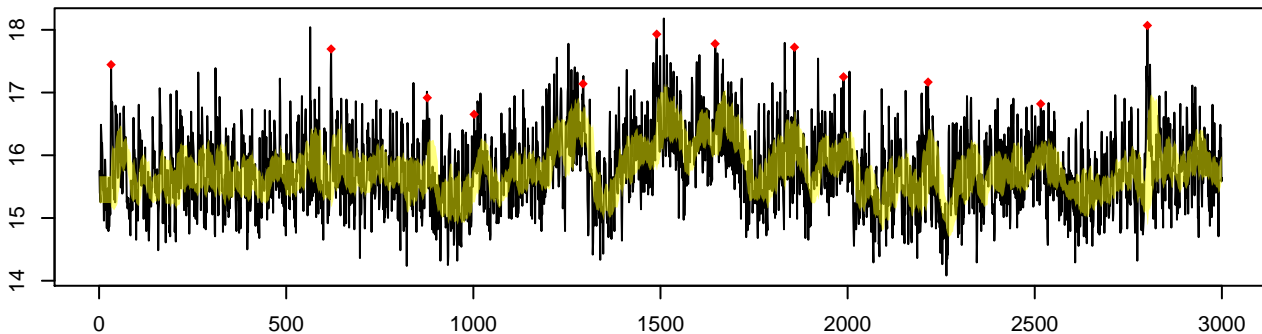

**Graph 18 , 33 Total Activity 8**

**Variance Area 572**

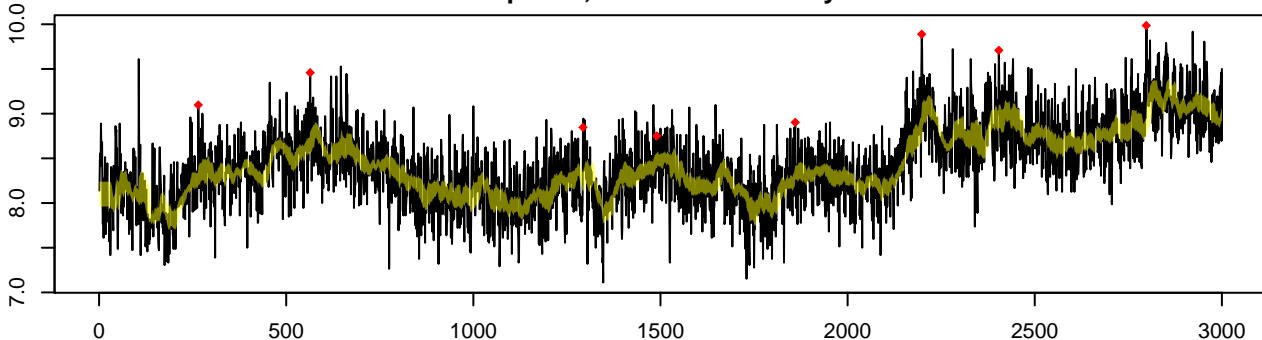

**Graph 19 , 33 Total Activity 4**

**Variance Area 416**

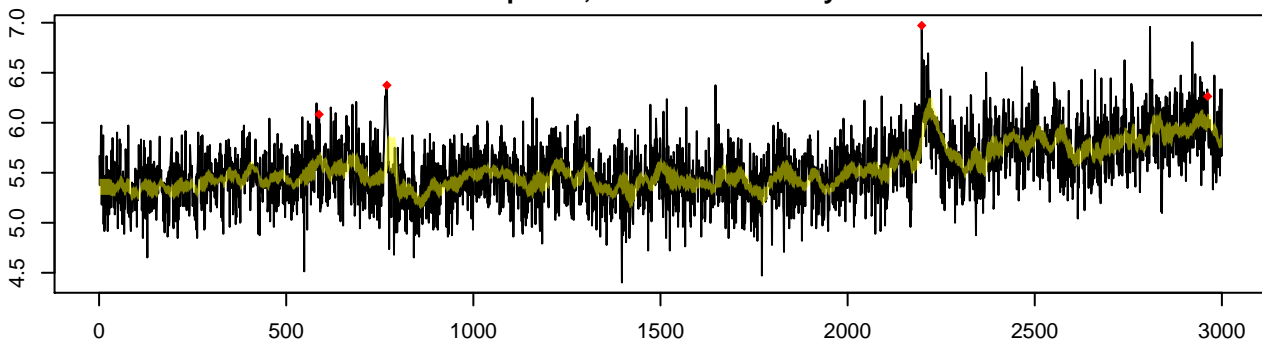

**Graph 20 , 33 Total Activity 11**

**Variance Area 837**

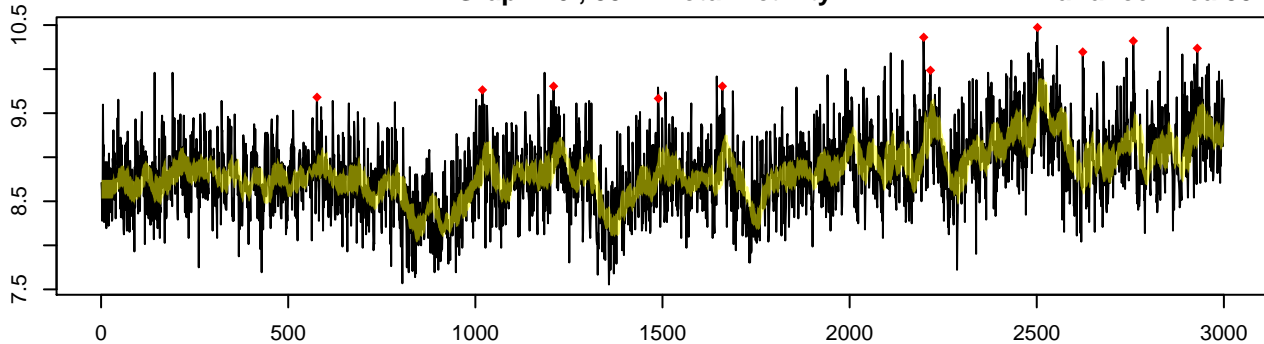

**Graph 21 , 33 Total Activity 20**

**Variance Area 1208**

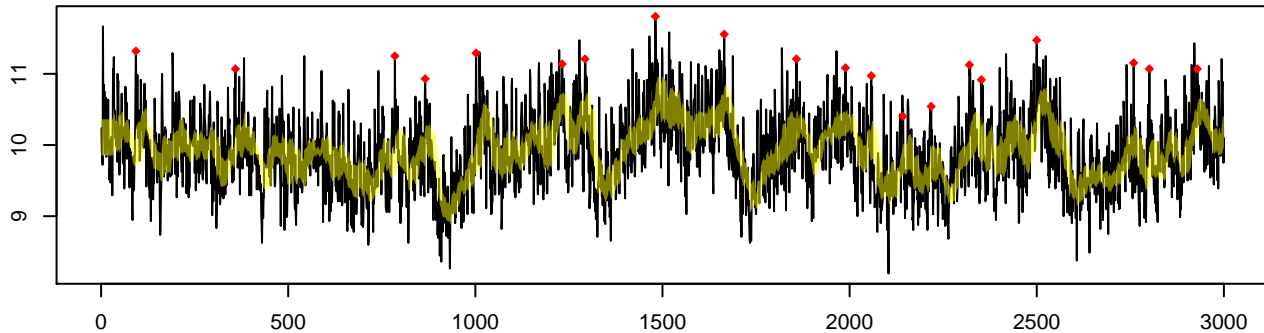

**Graph 22 , 33 Total Activity 5**

**Variance Area 372**

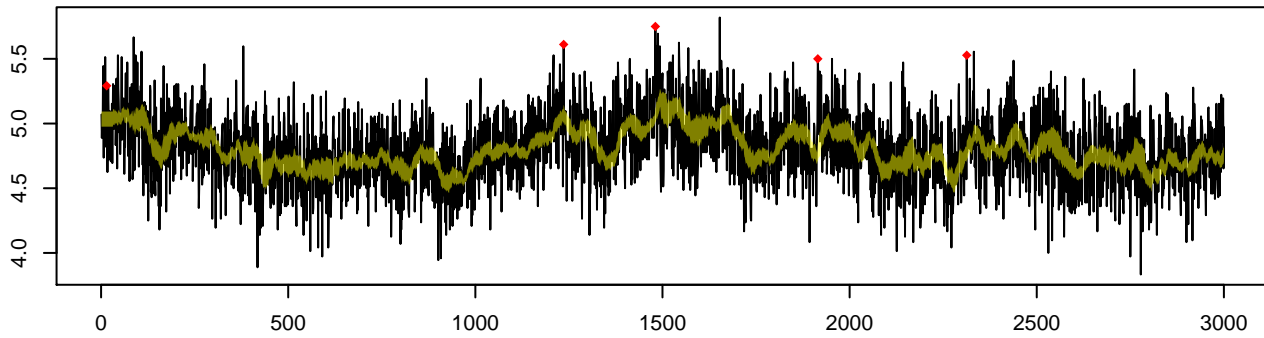

**Graph 26 , 33 Total Activity 4**

**Variance Area 389**

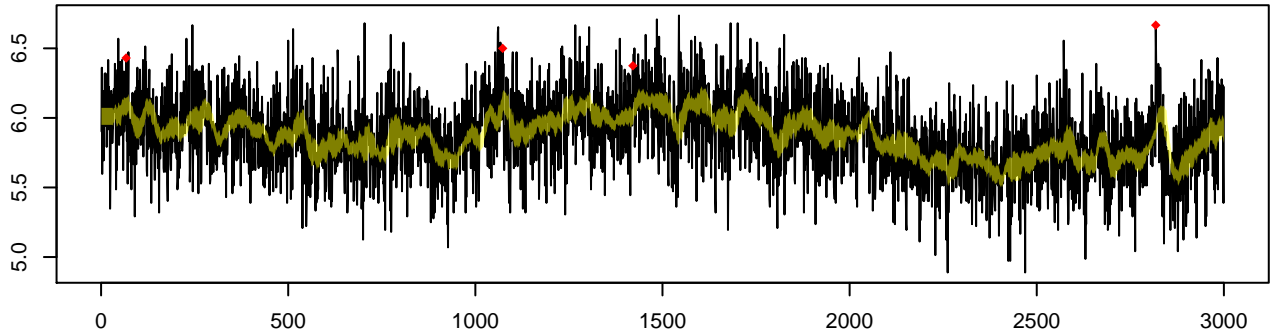

**Graph 27 , 33 Total Activity 5**

**Variance Area 468**

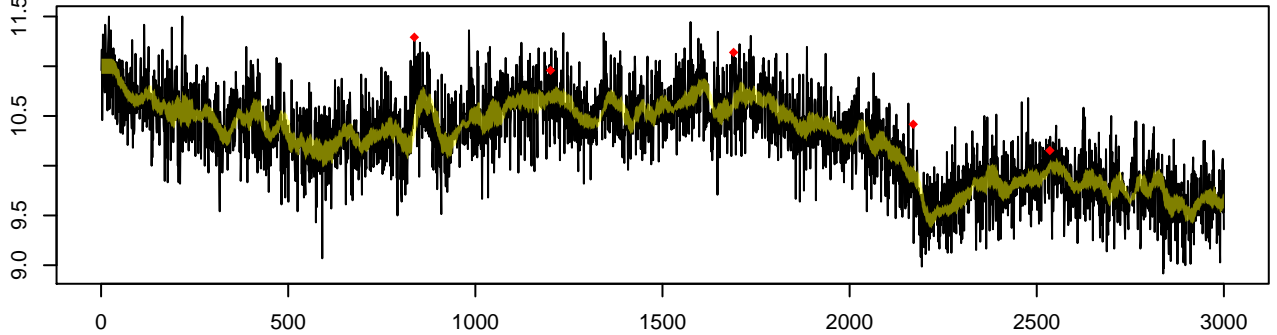

**Graph 28 , 33 Total Activity 2**

**Variance Area 407**

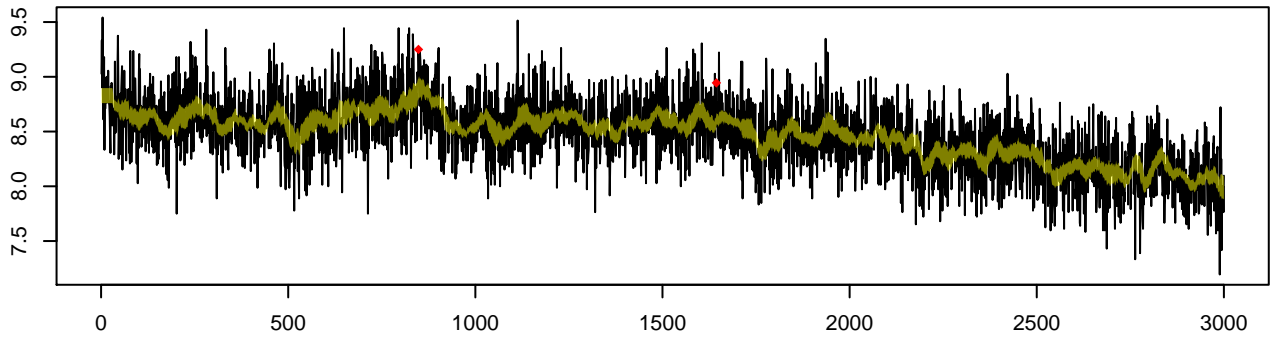

**Graph 32 , 33 Total Activity 1**

**Variance Area 334**

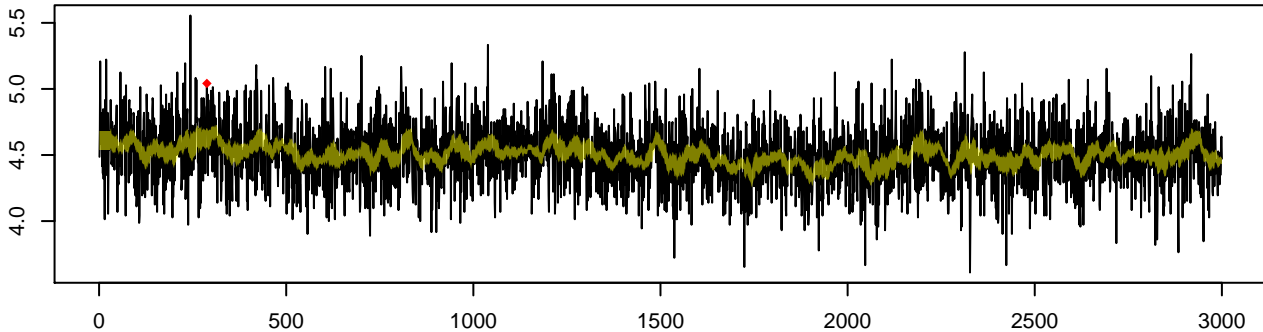

**Graph 38 , 33 Total Activity 2**

**Variance Area 322**

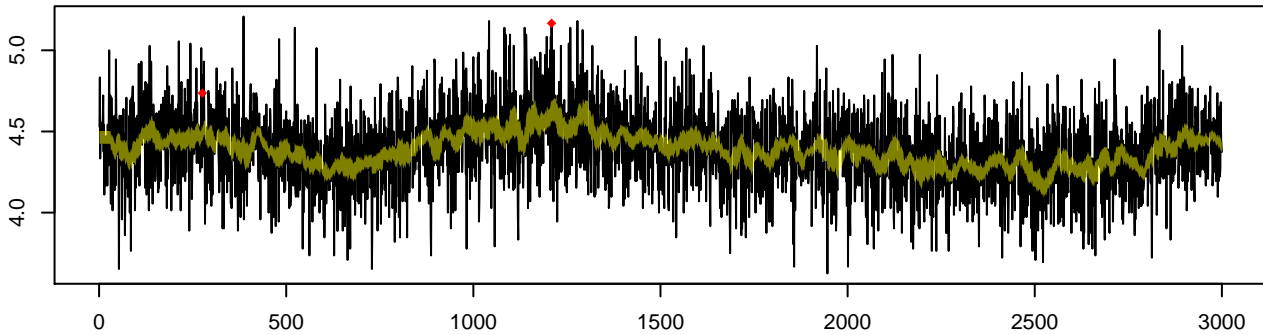

**Graph 15 , 32 Total Activity 9**

**Variance Area 480**

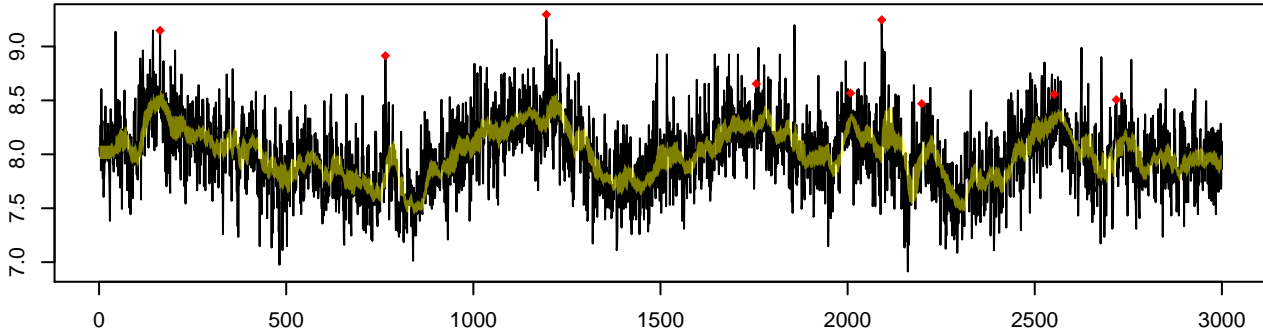

**Graph 16 , 32 Total Activity 20**

**Variance Area 1508**

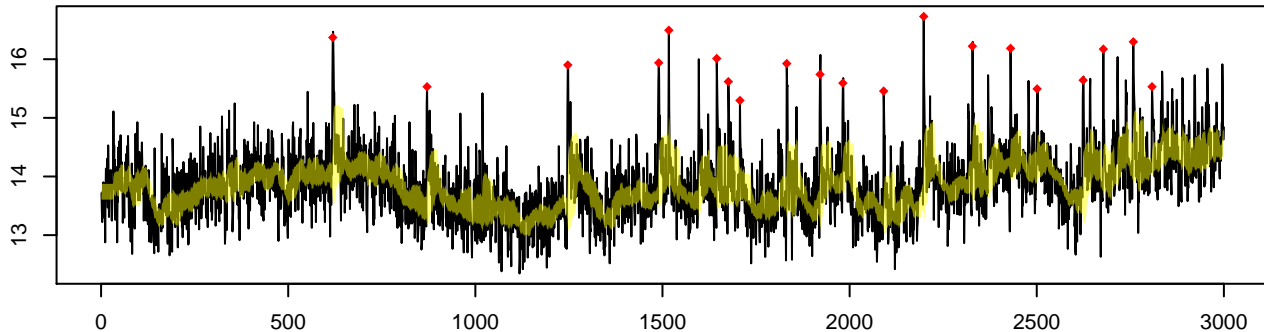

**Graph 17 , 32 Total Activity 17**

**Variance Area 1489**

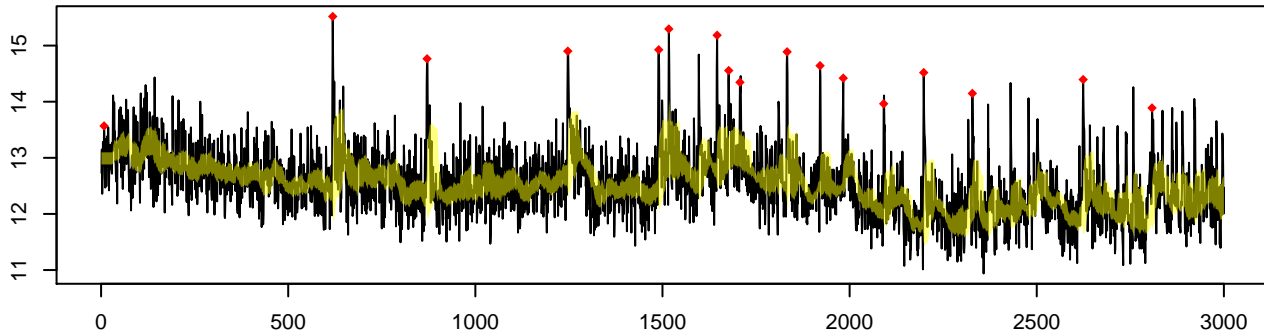

**Graph 18 , 32 Total Activity 12**

**Variance Area 1722**

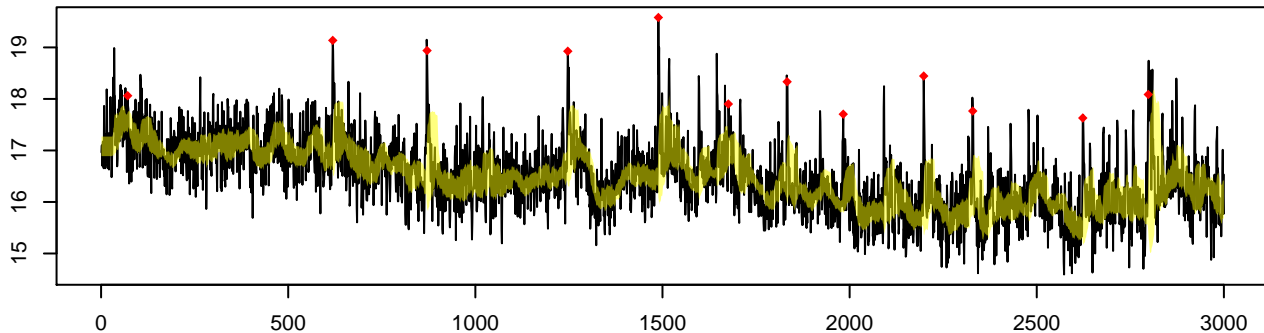

**Graph 19 , 32 Total Activity 14**

**Variance Area 1640**

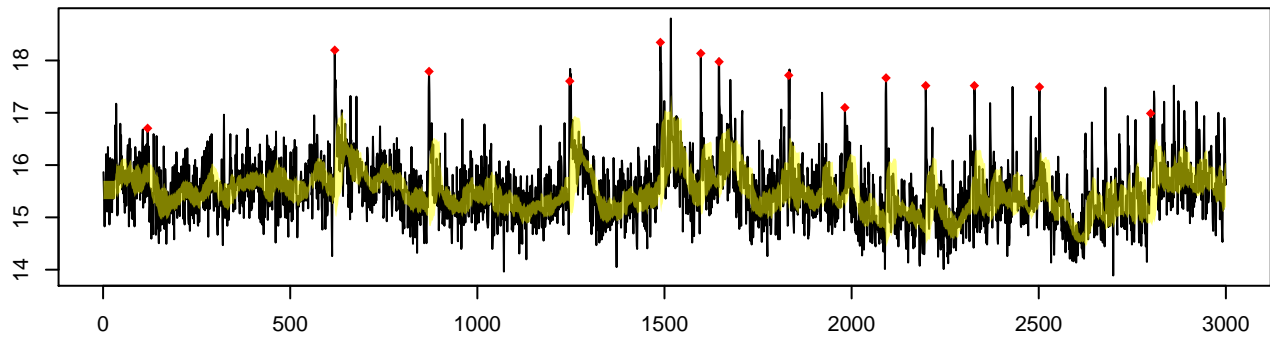

**Graph 20 , 32 Total Activity 14**

**Variance Area 1202**

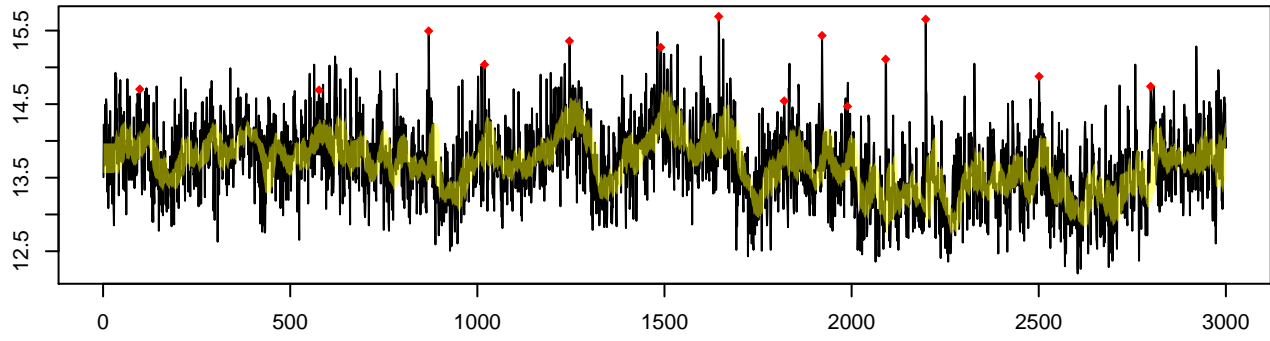

**Graph 21 , 32 Total Activity 5**

**Variance Area 370**

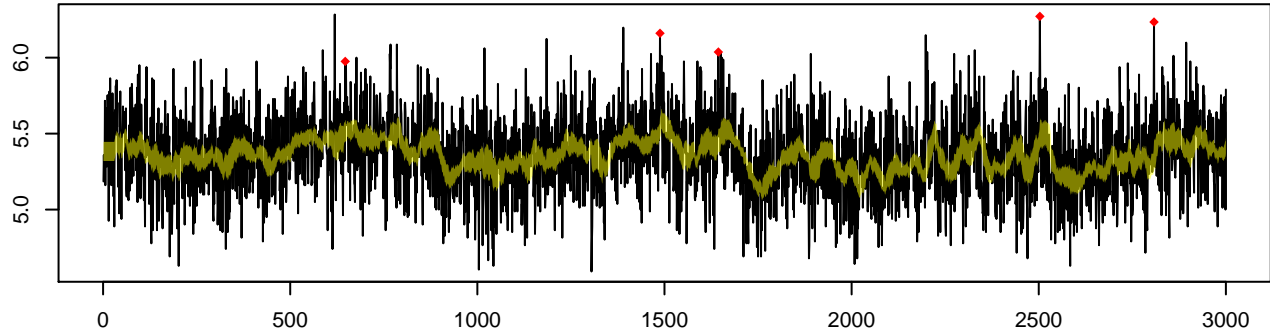

**Graph 25 , 32 Total Activity 5**

**Variance Area 292**

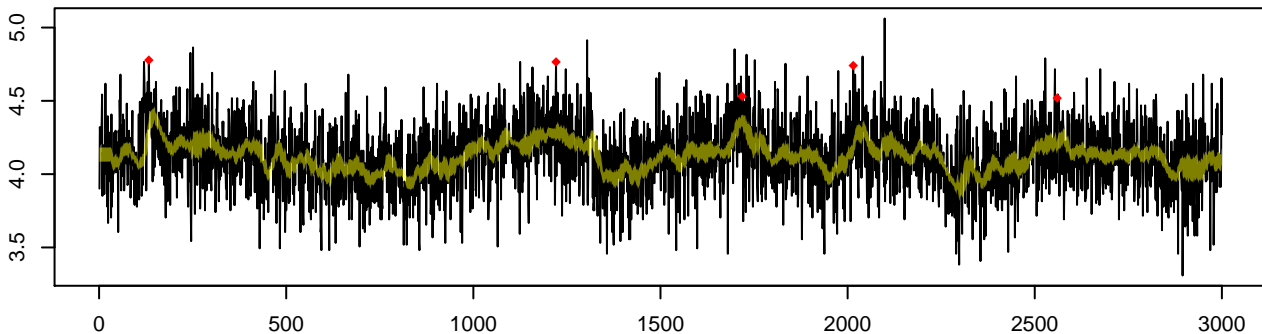

**Graph 26 , 32 Total Activity 5**

**Variance Area 342**

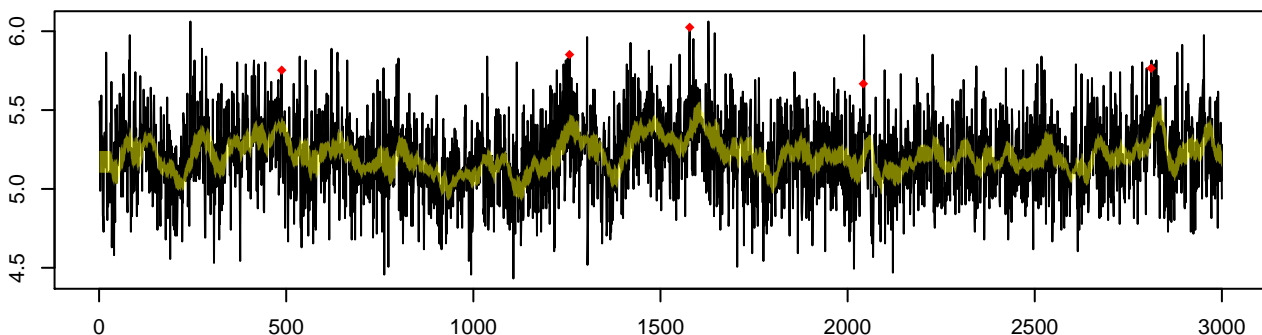

**Graph 27 , 32 Total Activity 2**

**Variance Area 362**

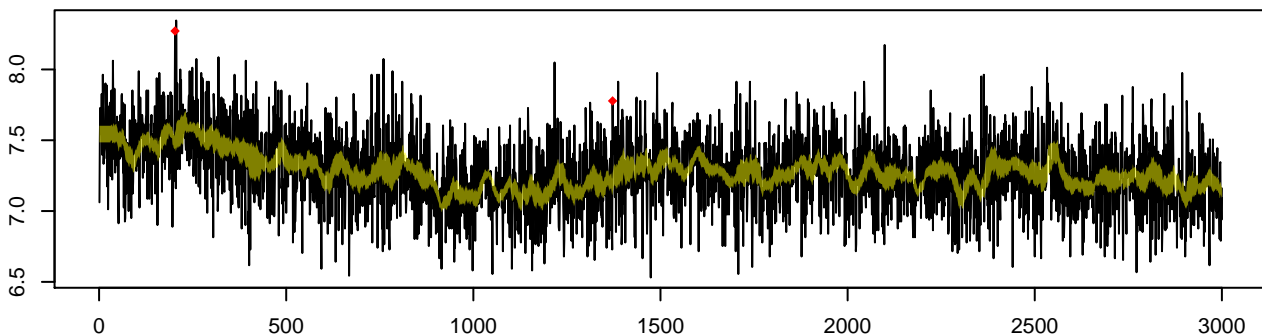



**Graph 28 , 32 Total Activity 3**

**Variance Area 311**

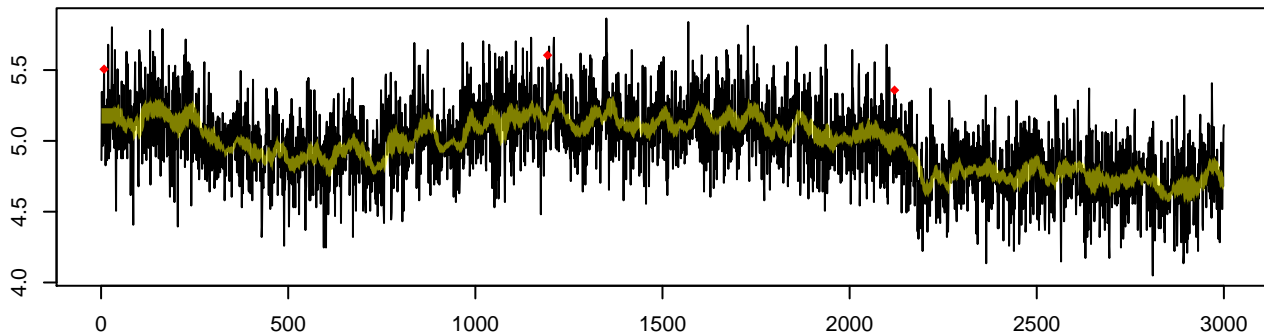

**Graph 29 , 32 Total Activity 3**

**Variance Area 345**

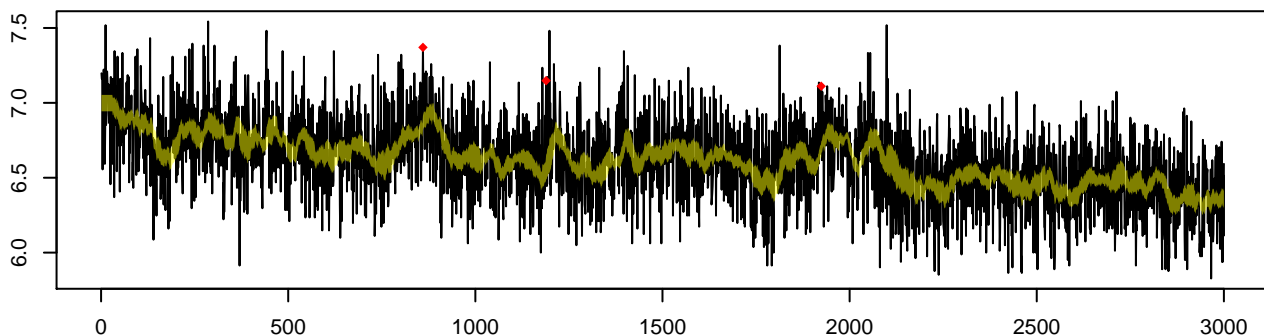

**Graph 33 , 32 Total Activity 1**

**Variance Area 289**

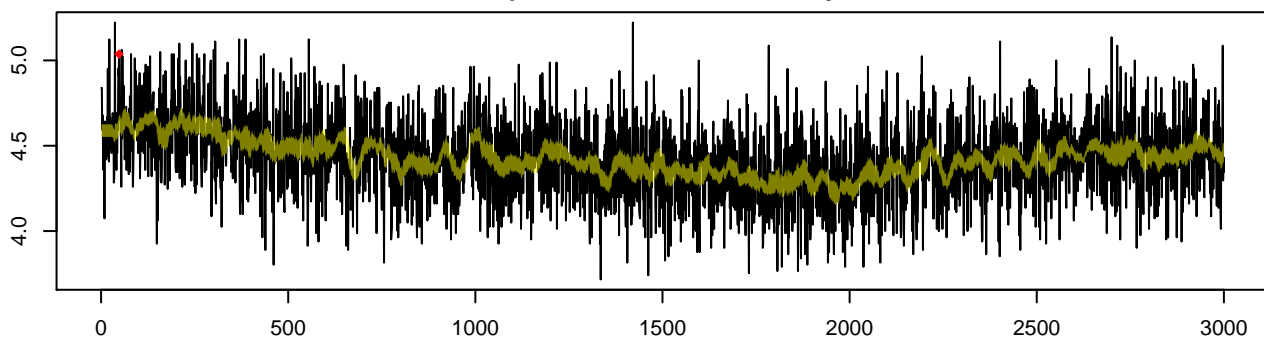

**Graph 35 , 32 Total Activity 2**

**Variance Area 301**

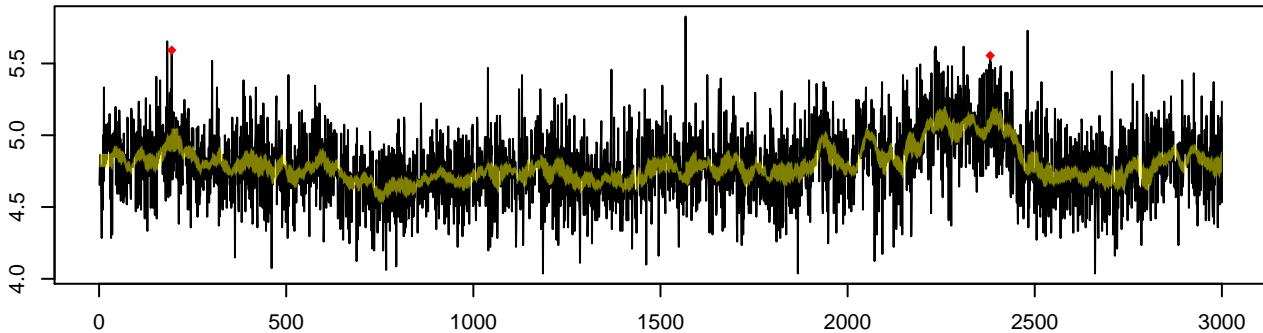

**Graph 38 , 32 Total Activity 2**

**Variance Area 275**

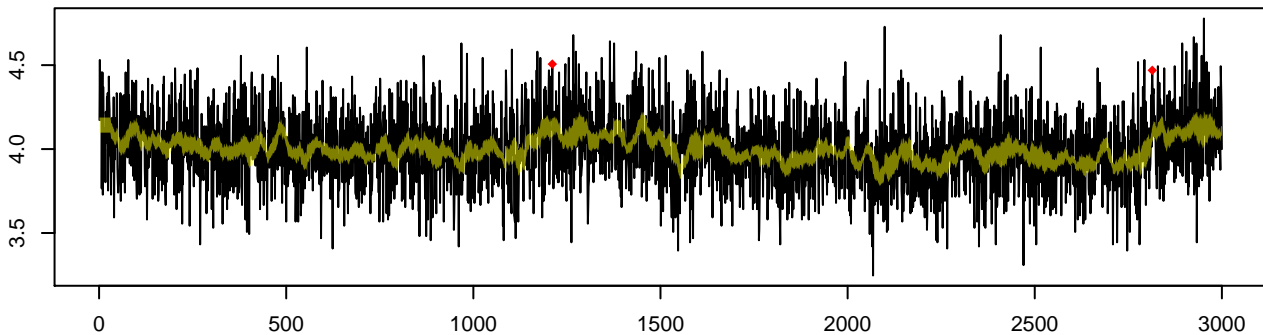

**Graph 1 , 31 Total Activity 4**

**Variance Area 358**

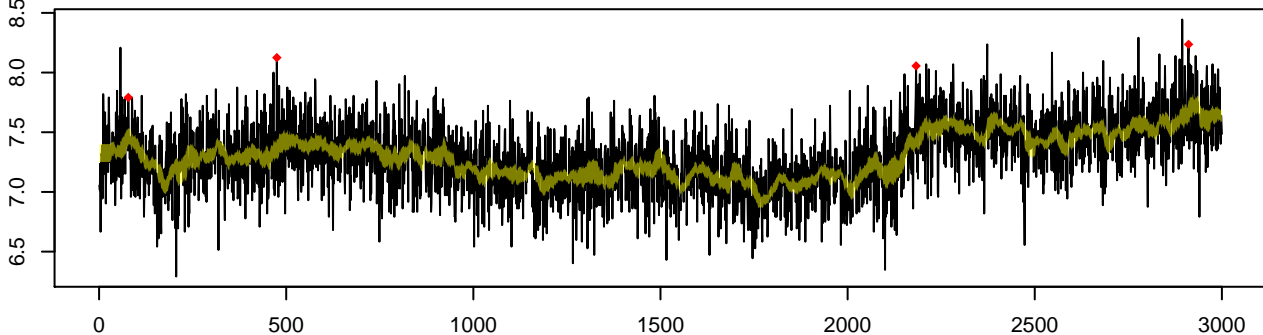

**Graph 14 , 31 Total Activity 3**

**Variance Area 375**

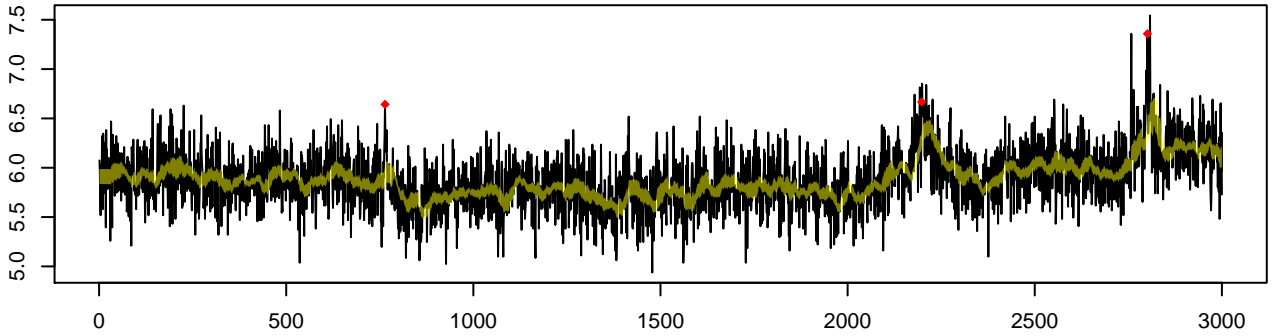

**Graph 15 , 31 Total Activity 12**

**Variance Area 1106**

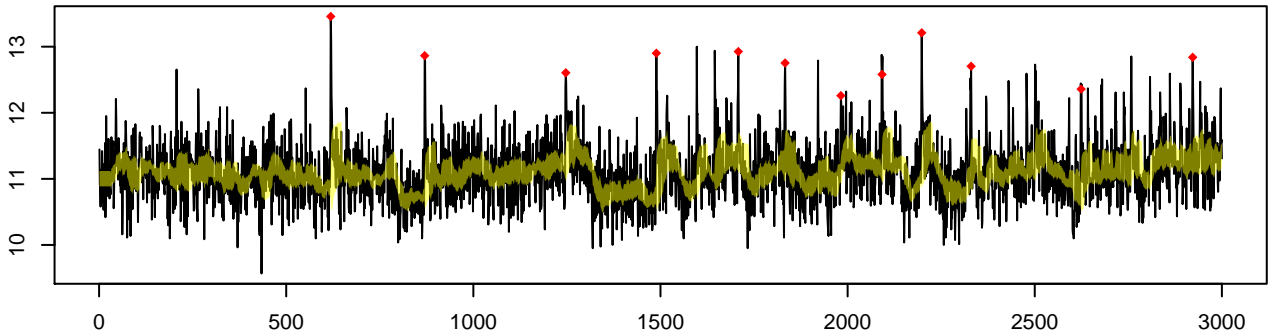

**Graph 16 , 31 Total Activity 22**

**Variance Area 3279**

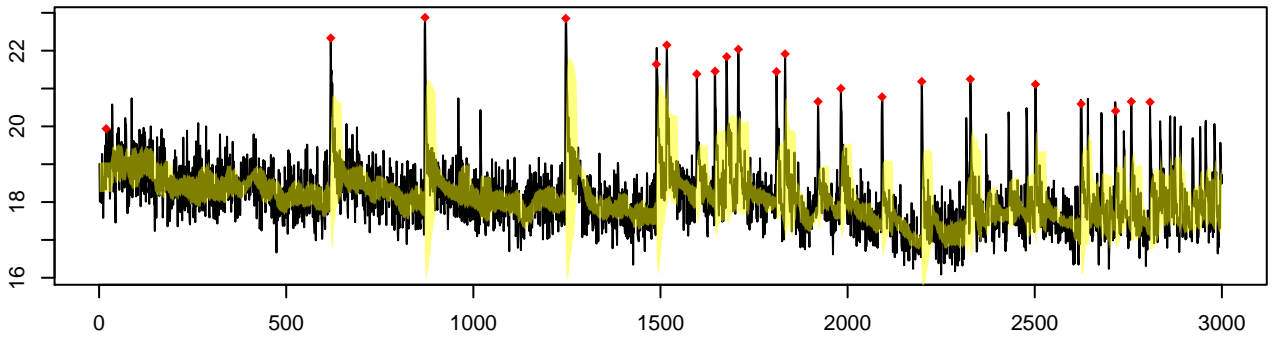

**Graph 17 , 31 Total Activity 24**

**Variance Area 5255**

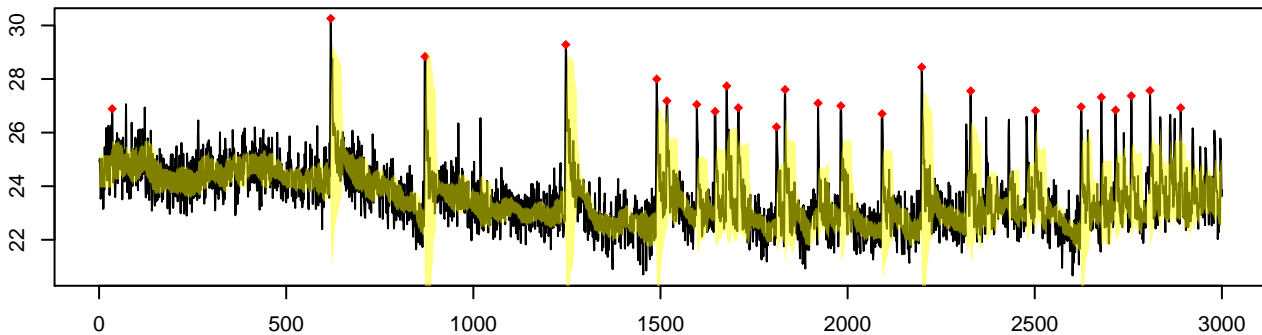

**Graph 18 , 31 Total Activity 24**

**Variance Area 5696**

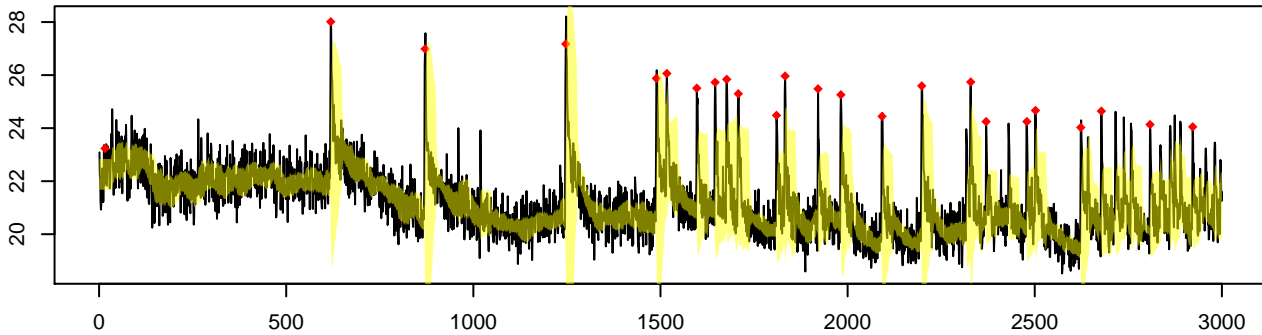

**Graph 19 , 31 Total Activity 22**

**Variance Area 3159**

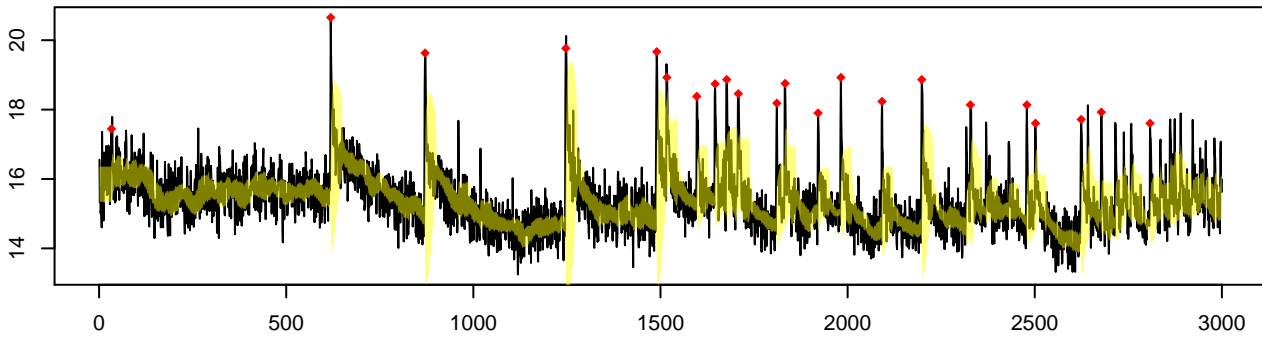

Supplement: pcbi.1006054.s007.pdf [file pcbi.1006054.s007.pdf]
