# Supplementary material for: An open source tool for automatic spatiotemporal assessment of calcium transients and local ‘signal-close-to-noise’ activity in calcium imaging data
Source: PubMed Central journal article supplement (PMC5895056; doi:10.1371/journal.pcbi.1006054), 2018-03-30

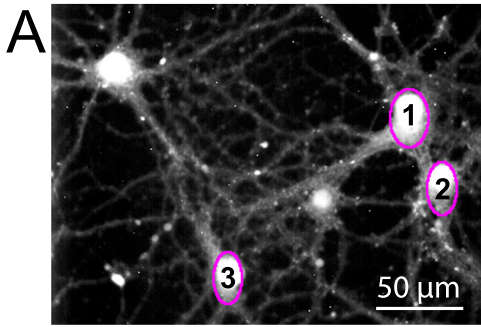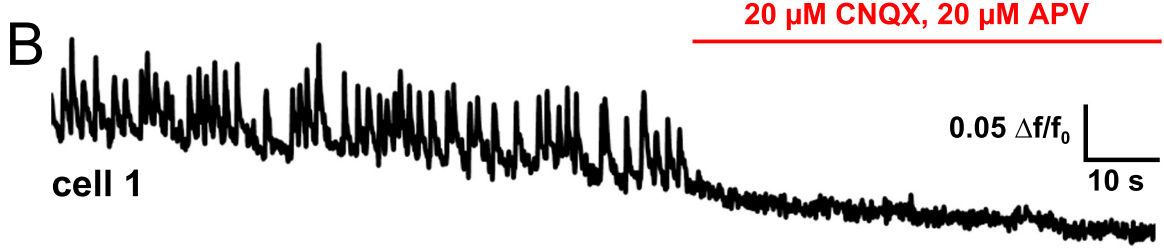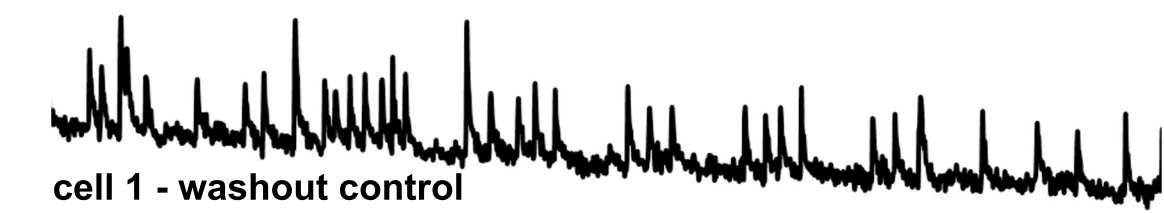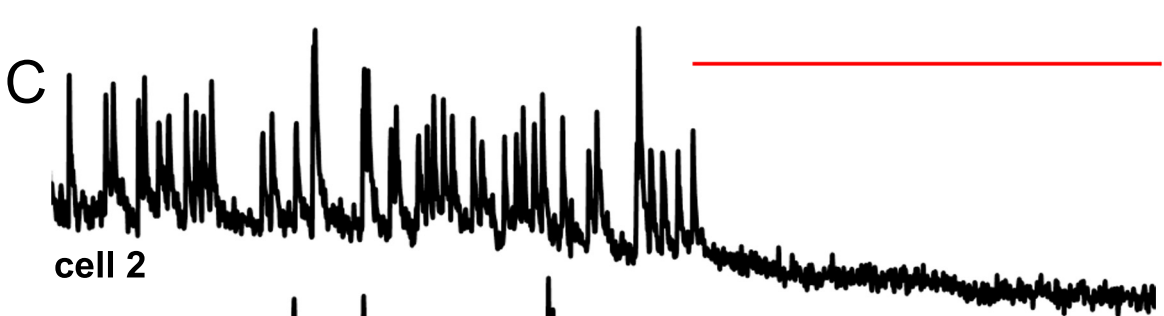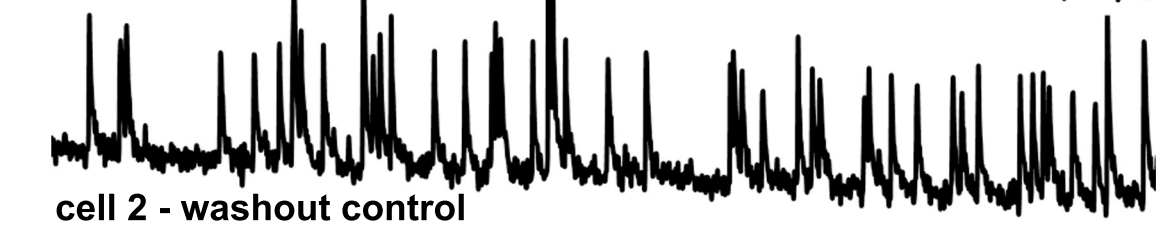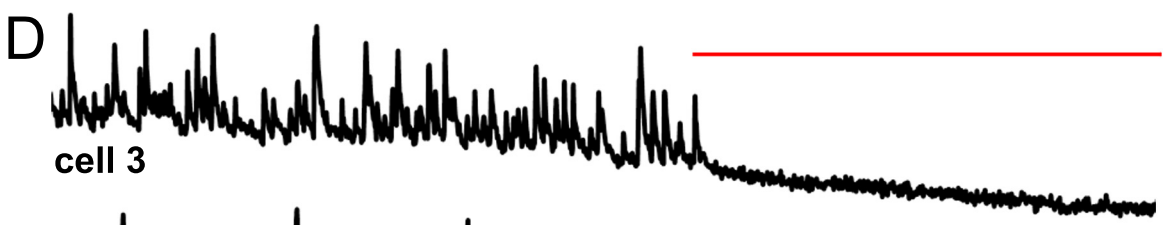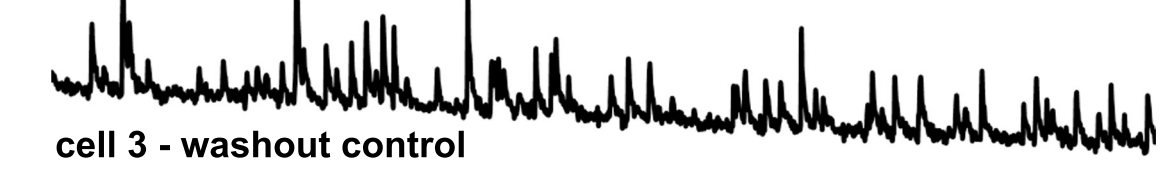

Supplement: pcbi.1006054.s008.pdf [file pcbi.1006054.s008.pdf]
