# Supplementary material for: An open source tool for automatic spatiotemporal assessment of calcium transients and local ‘signal-close-to-noise’ activity in calcium imaging data
Source: PubMed Central journal article supplement (PMC5895056; doi:10.1371/journal.pcbi.1006054), 2018-03-30

# Centers of ROI

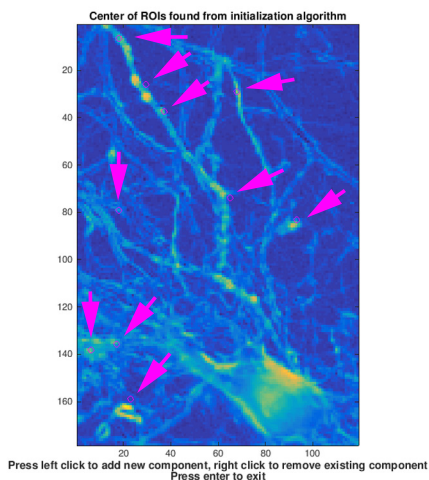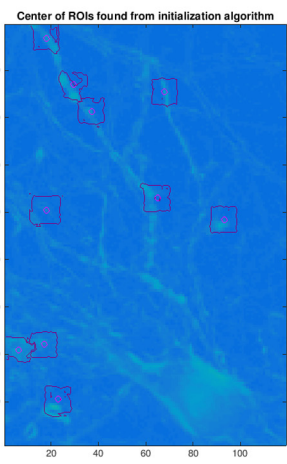

## computed components

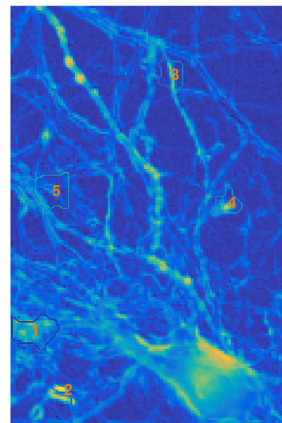

## detected component 1

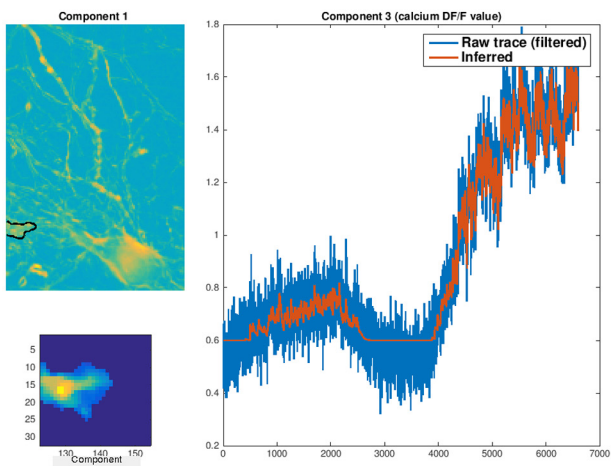

## detected component 3

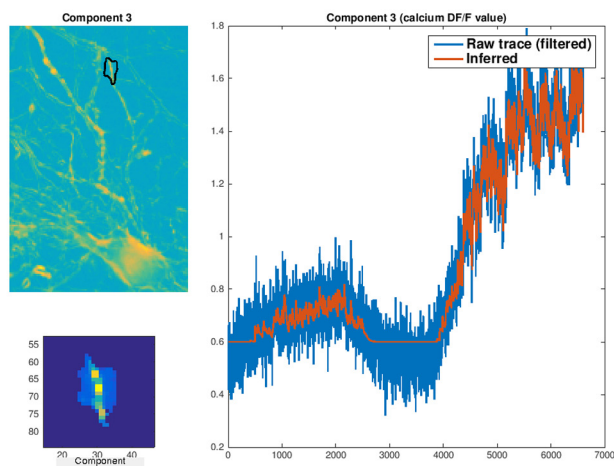

## detected component 4

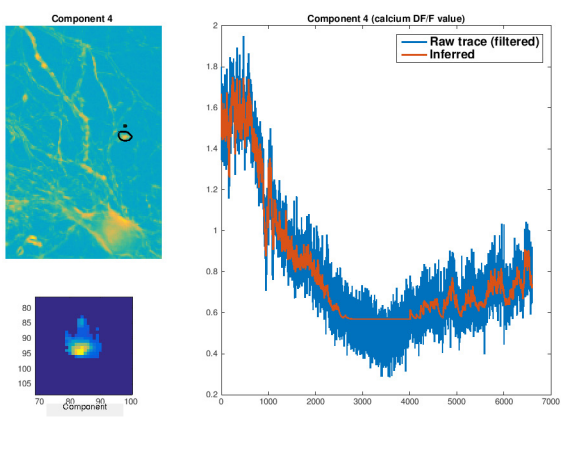

## background activity

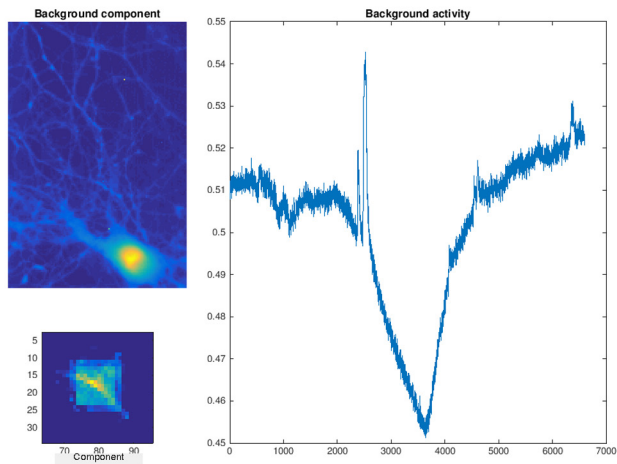

Supplement: pcbi.1006054.s009.pdf [file pcbi.1006054.s009.pdf]
